# Supplementary material for: MicroRNA Transcriptome of Poly I:C-Stimulated Peripheral Blood Mononuclear Cells Reveals Evidence for MicroRNAs in Regulating Host Response to RNA Viruses in Pigs
Source: Int J Mol Sci. 2016 Sep 22;17(10):1601. doi: 10.3390/ijms17101601 (PMC5085634; doi:10.3390/ijms17101601)
Supplement: Supplementary file 1 [file ijms-17-01601-s001.xlsx]

## Sheet: Table S1
Table S1: Overview of reads from raw data to mappable sequences
	DP11				DP12				DP19				DP11P				DP12P				DP19P				L1				L8				L9				PL1				PL8				PL9
type	Total	% of Total	uniq	% of uniq	Total	% of Total	uniq	% of uniq	Total	% of Total	uniq	% of uniq	Total	% of Total	uniq	% of uniq	Total	% of Total	uniq	% of uniq	Total	% of Total	uniq	% of uniq	Total	% of Total	uniq	% of uniq	Total	% of Total	uniq	% of uniq	Total	% of Total	uniq	% of uniq	Total	% of Total	uniq	% of uniq	Total	% of Total	uniq	% of uniq	Total	% of Total	uniq	% of uniq
Raw reads	11374118	100	454277	100	12657483	100	498354	100	17823904	100	616979	100	14095067	100	553907	100	9928894	100	742862	100	12993667	100	644017	100	15910120	100	789484	100	12526302	100	709139	100	10132009	100	601456	100	10477369	100	549995	100	14097600	100	750649	100	12579307	100	680001	100
3ADT&length filter	4483666	39.42	266575	58.68	3715867	29.36	297844	59.77	4476027	25.11	348704	56.52	4514400	32.03	330892	59.74	4520580	45.53	496607	66.85	4999040	38.47	397004	61.64	4575484	28.76	494688	62.66	1382401	11.04	422127	59.53	1075463	10.61	352037	58.53	1425099	13.6	333398	60.62	1521080	10.79	425487	56.68	1373538	10.92	409001	60.15
Junk reads	9337	0.08	2649	0.58	16573	0.13	3520	0.71	23147	0.13	5029	0.82	13795	0.1	3111	0.56	10291	0.1	2917	0.39	16797	0.13	3685	0.57	17028	0.11	3771	0.48	19194	0.15	5915	0.83	17246	0.17	4492	0.75	11183	0.11	3003	0.55	26135	0.19	5483	0.73	19381	0.15	4336	0.64
Rfam	594223	5.22	26829	5.91	802770	6.34	27191	5.46	1173359	6.58	34484	5.59	1021646	7.25	30567	5.52	616156	6.21	47022	6.33	895706	6.89	32354	5.02	963200	6.05	43116	5.46	716915	5.72	31515	4.44	636796	6.28	28361	4.72	688670	6.57	24322	4.42	1075402	7.63	35604	4.74	658344	5.23	32072	4.72
mRNA	50176	0.44	26411	5.81	63455	0.5	25581	5.13	96522	0.54	40612	6.58	78460	0.56	34999	6.32	54098	0.54	24700	3.32	90934	0.7	43984	6.83	75851	0.48	31334	3.97	64763	0.52	33255	4.69	61098	0.6	31662	5.26	46542	0.44	21739	3.95	99155	0.7	50485	6.73	79613	0.63	39552	5.82
Repeats	38390	0.34	3498	0.77	35344	0.28	3728	0.75	49218	0.28	4832	0.78	56165	0.4	4203	0.76	81218	0.82	4019	0.54	53908	0.41	4503	0.7	55829	0.35	4560	0.58	29400	0.23	4179	0.59	28404	0.28	3469	0.58	19194	0.18	2751	0.5	42774	0.3	4544	0.61	31608	0.25	3670	0.54
mappable sequences	6240282	54.86	131356	28.92	8064522	63.71	143731	28.84	12067229	67.7	187713	30.42	8475034	60.13	153905	27.79	4729401	47.63	171385	23.07	6999230	53.87	166574	25.86	10277767	64.6	215860	27.34	10340107	82.55	215893	30.44	8341394	82.33	184482	30.67	8307084	79.29	167070	30.38	11378176	80.71	232896	31.03	10448453	83.06	194726	28.64

## Sheet: Table S2
Table S2: Detailed information of the known and novel miRNA identified in this study
Pre-miRNA Index	miRNA_Index	miR_name	miR_seq	len	genomeID	strand	start	end	genome_seq	#mir	mirIDs,	rep_mirID	rep_mirSeq	rep_miRID	rep_miRSeq	type	Sequence in miRbase	group	SS	hairpinLen	CG%	dG	DP11(norm)	DP11P(norm)	DP12(norm)	DP12P(norm)	DP19(norm)	DP19P(norm)	L1(norm)	L8(norm)	L9(norm)	PL1(norm)	PL8(norm)	PL9(norm)	Expression level
312	304	PC-3p-51651_22	TGGGCCTCTGGATGCACG	18	1	+	2144387	2144457	caaggcgtgctccaggtgatggtgtgaatgcctcttgctgcatcactcGGGGCCTCTGGATGCACGcccct	0						3'	New	gp4	...((((((((((((((..(((.((((.(((........))))))))))..)))..)))).)))))))...	65	62	-31.4	7.00003	6.6251	0	6.93999	4.09941	2.55272	0	2.87336	0	0	0	1.35553	low
57	51	PC-5p-90965_9	TGGTTCAGGTCCGGGTGC	18	1	+	5698199	5698286	ggtgcTGGTTCAGGTCCTGGTGCgggaggcgtctgctctccaccgtctgcgtccagaagtctcatcgaagccaggaaacaccggttac	0						5'	New	gp4	...((((((.....(((((((.((((((((.((((.....((.....))....)))).))))).)))..)))))))...))))))...	82	61.4	-31.1	0	0.66251	1.03181	3.46999	0.819882	0.638181	0.385248	0	0	0	0	0	low
47	40	PC-5p-157402_4	AGAGGACGCTTGTTGTCGGCGT	22	1	+	9388468	9388569	gccgttaagtAGAGGACGCTTGTTGTCGGCGTccggcgtctcgggcacgCAAGGCAGCATGTGTTCTCTCTttgggccctcgggttggaaggcgtggattga	0						5'	New	gp4	(((....((.(((((((((.(((((((.((((((((....))))..))))..))))))).)))))))))))((..(((....)))..)).))).........	64	60.8	-40.9	0	0	0	0	0.819882	1.27636	1.54099	1.43668	3.46704	1.01428	0.620322	1.35553	low
47	41	PC-3p-117123_6	CAAGGCAGCATGTGTTCTCTCT	22	1	+	9388468	9388569	gccgttaagtAGAGGACGCTTGTTGTCGGCGTccggcgtctcgggcacgCAAGGCAGCATGTGTTCTCTCTttgggccctcgggttggaaggcgtggattga	0						3'	New	gp4	(((....((.(((((((((.(((((((.((((((((....))))..))))..))))))).)))))))))))((..(((....)))..)).))).........	64	60.8	-40.9	0	2.65004	2.06363	0	2.45964	1.27636	0.770496	0	3.46704	0	0	4.74437	low
489	481	PC-3p-102257_8	CCCGCTCGAGCAGATCCGGCTGTT	24	1	+	9475922	9475992	ttccagCCGGGTCTGCGGAGACGGGCACgcggctgaaagggagctgCCCGCTCGAGCAGATCCGGCTGTTt	0						3'	New	gp4	...(((((((((((((.(((.((((((.((..((....))..)))))))))))..)))))))))))))...	65	67.6	-49.3	1.75001	0	4.12725	1.735	0	0	0	2.87336	4.3338	0	1.86097	2.0333	low
409	401	PC-3p-74066_13	TGGACTAACTGTGGTATTGGGA	22	1	+	24218167	24218248	accccgtttgagctcccagtaccacagtaaggccatgttaacaagagaTGGACTAACTGTGGTATTGGGAgctcaaaggagc	0						3'	New	gp4	...((.((((((((((((((((((((((.((.((((.((.....)).)))).)).))))))))))))))))))))))))...	76	50	-50.7	0	2.65004	6.19088	0	1.63976	2.55272	2.31149	4.31003	0.86676	6.0857	3.10161	0.677767	low
70	62	PC-5p-122702_6	GCCGCCGAGTCGCGCGGA	18	1	-	44781305	44781409	tcctggtgagttacctgcgGCCGCCGAGGCGCGCGGAaggcgggtcgcgggccccgggacgggccggctcccggccaccccgcgctcccttggcgctcgccgacc	0						5'	New	gp4	....((((...))))..((((((((((((.((((((..(((.((..((.(((((......))))).))..)).)))...))))))..))))))))...))))...	85	81	-61.4	0	0	3.09544	1.735	0	1.27636	0.770496	0	0	0	0	0	low
25	23	PC-5p-72243_13	AGGCCCTTACATAGTCAGACT	21	1	+	56916474	56916564	nnntcacattcggttAGGCCCTTACATAGTCAGACTcttgtgtgacatagcagtgagtctgactatgtaggggcctaaccaaatgggaaaa	0						5'	New	gp4	...((.((((.((((((((((((((((((((((((((((((........)))).)))))))))))))))))))))))))).)))).))...	85	44	-57.8	0.875004	3.31255	1.54772	1.735	0.409941	1.27636	1.15574	1.79585	1.73352	1.52142	1.24064	1.69442	low
17	25	ssc-miR-30c-3p	CTGGGAGAAGGCTGTTTACTCT	22	1	-	57721695	57721837	ccccccagcccctccctagagctcactgagggacagatacTGTAAACATCCTACACTCTCAGCTgtggaaagtaagaaagCTGGGAGAAGGCTGTTTACTCTctctgccttggaaatcagctaaagagaaatggactgggagt	34	ssc-mir-30c-1,ssc-mir-30c-2,ssc-mir-30b,bta-mir-30c,bta-mir-30f,bta-mir-30b,oar-mir-30b,eca-mir-30c,eca-mir-30c-2,eca-mir-30b,cfa-mir-30c-1,cfa-mir-30c-2,cfa-mir-30b,hsa-mir-30c-2,hsa-mir-30b,ptr-mir-30c-1,ggo-mir-30c,ggo-mir-30b,mml-mir-30c-2,age-mir-30b,cgr-mir-30c,cgr-mir-30b,mmu-mir-30c-2,mmu-mir-30c-1,mmu-mir-30b,rno-mir-30c-2,rno-mir-30b,mdo-mir-30c-1,mdo-mir-30c-2,mdo-mir-30b,sha-mir-30c,o…	ssc-mir-30c-2	gacagatacTGTAAACATCCTACACTCTCAGCtgtggaaagtaagaaagCTGGGAGAAGGCTGTTTACTCTctctgcctt	ssc-miR-30c-3p	CTGGGAGAAGGCTGTTTACTCT	3'	Yes	gp2	...(((((((..((.((..((((..(..(((..((((....(((((((.(((...(((((((((..............))))))))).))).)))))))....)))))))..).....))))..)).))...)).)))))...	137	50.3	-51.1	1.75001	5.30008	5.67497	4.33749	4.50935	5.74363	6.16397	2.15502	3.90042	7.60712	1.86097	2.71107	low
14	19	ssc-miR-30a-5p_R+2_1ss13CT	TGTAAACATCCTTGACTGGAAGCT	24	1	-	57750779	57750873	tccctgcgacagtgagcggcTGTAAACATCCTCGACTGGAAGCTgtgaggctgaagacgggCTTTCAGTCGGATGTTTGCAGCcgccgactgcct	31	ssc-mir-30a,ssc-mir-30d,ssc-mir-30e,bta-mir-30a,bta-mir-30d,bta-mir-30e,eca-mir-30e,eca-mir-30d,cfa-mir-30a,cfa-mir-30e,cfa-mir-30d,hsa-mir-30a,hsa-mir-30d,ptr-mir-30e,ggo-mir-30e,mml-mir-30a,mml-mir-30d,mml-mir-30e,cgr-mir-30a,cgr-mir-30e,cgr-mir-30d,mmu-mir-30a,mmu-mir-30d,mmu-mir-30e,rno-mir-30a,mdo-mir-30a,mdo-mir-30d,sha-mir-30e,oan-mir-30a,oan-mir-30d,oan-mir-30e,	ssc-mir-30a	tccctgcgacagtgagcggcTGTAAACATCCTCGACTGGAAGctgtgaggctgaagacgggCTTTCAGTCGGATGTTTGCAGCcgccgactgcctcccgcatcagga	ssc-miR-30a-5p	TGTAAACATCCTCGACTGGAAG	5'	Diff	gp2	.........((((..((((((((((((((((..(((((((((((((..........)).)))))))))))))))))))))))))))..))))...	83	58.9	-50.6	59345.4	69292.6	68139.9	43717.6	70059.3	54480.9	73916.4	70646.8	65643.2	95758.5	58695.5	54128.8	high
14	20	ssc-miR-30a-3p_1ss18GA	CTTTCAGTCGGATGTTTACAGC	22	1	-	57750779	57750873	tccctgcgacagtgagcggcTGTAAACATCCTCGACTGGAAGCTgtgaggctgaagacgggCTTTCAGTCGGATGTTTGCAGCcgccgactgcct	31	ssc-mir-30a,ssc-mir-30d,ssc-mir-30e,bta-mir-30a,bta-mir-30d,bta-mir-30e,eca-mir-30e,eca-mir-30d,cfa-mir-30a,cfa-mir-30e,cfa-mir-30d,hsa-mir-30a,hsa-mir-30d,ptr-mir-30e,ggo-mir-30e,mml-mir-30a,mml-mir-30d,mml-mir-30e,cgr-mir-30a,cgr-mir-30e,cgr-mir-30d,mmu-mir-30a,mmu-mir-30d,mmu-mir-30e,rno-mir-30a,mdo-mir-30a,mdo-mir-30d,sha-mir-30e,oan-mir-30a,oan-mir-30d,oan-mir-30e,	ssc-mir-30a	tccctgcgacagtgagcggcTGTAAACATCCTCGACTGGAAGctgtgaggctgaagacgggCTTTCAGTCGGATGTTTGCAGCcgccgactgcctcccgcatcagga	ssc-miR-30a-3p	CTTTCAGTCGGATGTTTGCAGC	3'	Diff	gp2	.........((((..((((((((((((((((..(((((((((((((..........)).)))))))))))))))))))))))))))..))))...	83	58.9	-50.6	551.253	486.945	1073.6	654.094	581.706	1075.97	1045.95	1404.71	1552.8	1498.1	1246.54	595.757	middle
132	124	PC-3p-99994_8	TTCTATGATGACTTGATGTCTGAGG	25	1	+	58912756	58912824	gtaccaaagacataaagcatcagcagatgctttcgagaagtTTCTATGATGACTTGATGTCTGAGGaag	0						3'	New	gp4	...((..((((((.((((((((..(((..((((...))))..))).))))).))).))))))..))...	63	40.6	-22.7	0	0	0	1.735	0	2.55272	4.62298	0.718339	0.86676	0	0	1.35553	low
92	84	PC-5p-59701_18	TCTGTCTCCTCCCAACCTCAGT	22	1	-	80608420	80608495	cTCTGTCTCCTCCAAACCTCAGTgttcagcccatttactaactaatctagggtgtgcactgagtttaaggggaaat	0						5'	New	gp4	.....((((((..(((.((((((((...((((.................))))..))))))))))).))))))...	68	44.7	-25.8	0	0	0	0	0	0	3.85248	1.43668	2.60028	7.09998	0.620322	0.677767	low
273	265	PC-5p-366483_2	CCGGCCTCCGTGTCGCTGCCGT	22	1	-	93439617	93439738	tacgctgggagctgtcactaggccctccggctcCCGGCCTCCGTGTCGCTGCCGCggttgccaggagagcggcgccggcagggagcggtcgagcccgaggaaggtaacagcgtccccgcccc	0						5'	New	gp4	...((.(((((((((.(((....((((.((((((((..((((.(((((..(((((..((.....))..)))))..))))).)))))))..))))).))))..))).))))).)))).))...	116	73.8	-63.3	1.75001	0	0	5.20499	0	0	0	0	0	0	0	0	low
180	172	PC-3p-279488_2	AGGTGCTGCTGATGAAGTC	19	1	+	103887487	103887545	ccatgtgttcatagccccacatctatctaggtacATGTGCTGCTGATGAAGTCacattc	0						3'	New	gp4	..(((((((((((((..(((((.(((....))).)))))..))).)))))..)))))..	55	45.8	-17.2	0	0	0	3.46999	0	0	0	0	0	0	0	0	low
231	223	PC-5p-226254_3	ACCCTGTGAGTAAGGGAGGCTG	22	1	+	117532020	117532117	gttctgcgcggcacctCCCCTGTGAGTAAGGGAGGCTGgatctcaggcttgtttgagcacagctttccgtgcgttatcttggagcaagcgcgcaggct	0						5'	New	gp4	..((((((((....((((...(((((((.(((((((((...(((((......)))))..))))))))).))).))))...))))....))))))))..	94	59.2	-41.7	0	0	0	0	0	0	0	0	0	3.04285	0	0	low
405	397	PC-5p-30575_47	TTGGATGTGAAAGCCCTGGGC	21	1	+	118116051	118116194	aggcccctgaggagcttacgtctagcacaggaagccaaaggagATGGATGTGAAAGCCCTGGGCcctctgatgaaattgcttcagggcctagagttaacatctttgcctcttccctagaccagatagagcttgtctaccagggg	0						5'	New	gp4	...((((((((((((((..((((((....(((((....(((....((((((....((.(((((((((..((..........))))))))))).))..))))))...))))))))))))))......))))))..))..))))))	141	52.8	-53	0	0	0	0	0	0	103.246	0	0	0	0	0	middle
66	58	PC-5p-277405_2	GTTGTATGGTTAAGTGACT	19	1	-	119655924	119656036	tttgtgttctattcctttatGTTGTATGGTTAATTGACTgctcccttggcttatagaatggcagtaggataagacagttatacataggatagaaataaggatttgggcatcca	0						5'	New	gp4	...(((..(...(((((..(((..((((..((((((.((..(((....(((........)))....)))..)).))))))..))))..))).....)))))...)..)))...	107	36.3	-28.3	0	0	0	3.46999	0	0	0	0	0	0	0	0	low
53	71	ssc-miR-190a_R+1	TGATATGTTTGATATATTAGGT	22	1	-	120448046	120448134	tctgcaggcctctgtgTGATATGTTTGATATATTAGGTtgttatttaatccaaCTATATATCAAACATATTCCTacagtgtcttgccct	9	ssc-mir-190a,bta-mir-190a,eca-mir-190a,cgr-mir-190a,mmu-mir-190a,rno-mir-190a-1,mdo-mir-190a,sha-mir-190,oan-mir-190a,	ssc-mir-190a	ggcctctgtgTGATATGTTTGATATATTAGGttgttatttaatccaactatatatcaaacatattcctacagtgtcttgccc	ssc-miR-190a	TGATATGTTTGATATATTAGG	5'	Diff	gp2	...(((((...(((((.((((((((((((((((..(((((..........)))))))))))))))))))))..)))))...)))))...	83	34.8	-30.7	56.0003	87.4514	58.8133	78.0749	75.4291	67.6472	98.6235	91.229	86.676	80.1284	106.075	139.62	middle
53	72	mmu-miR-190a-3p_L-1_1ss13GA	CTATATATCAAACATATTCCT	21	1	-	120448046	120448134	tctgcaggcctctgtgTGATATGTTTGATATATTAGGTtgttatttaatccaaCTATATATCAAACATATTCCTacagtgtcttgccct	9	ssc-mir-190a,bta-mir-190a,eca-mir-190a,cgr-mir-190a,mmu-mir-190a,rno-mir-190a-1,mdo-mir-190a,sha-mir-190,oan-mir-190a,	mmu-mir-190a	ctgtgTGATATGTTTGATATATTAGGTtgttatttaatccaACTATATATCAAGCATATTCCTacag	mmu-miR-190a-3p	ACTATATATCAAGCATATTCCT	3'	Diff	gp2	...(((((...(((((.((((((((((((((((..(((((..........)))))))))))))))))))))..)))))...)))))...	83	34.8	-30.7	1.75001	2.65004	0	6.93999	0.819882	3.82909	0.770496	3.59169	0.86676	3.04285	2.48129	1.35553	low
101	93	PC-3p-303530_2	CATTGCCTCAGTTCCAGGTC	20	1	-	124654398	124654482	caaatctggtttctgtccagtggtgctgatgccacagatcctctttgggagacgtgcctgcccCATTGCCTCAGTGCCAGGTCaa	0						3'	New	gp4	...(((((((..(((..((((((.((....((.((...((((....))))...))))..)).))))))...))).)))))))...	79	55.3	-28.3	0	0	0	3.46999	0	0	0	0	0	0	0	0	low
385	377	PC-5p-258348_2	TTTGATTAGTTGATGTCC	18	1	-	129652179	129652267	ggatTTTGATTAGTTCATGTCCataagactgctctctttcagcagaatgattagagcaatgtttccttgtccatgtattttcaagaaag	0						5'	New	gp4	...((((((..(((.((((..((..((((((((((...(((......)))..))))))..))))...))..)))).))).))))))...	83	36	-21.3	3.50002	0	0	0	0	1.27636	0	0	0	0	0	0	low
253	245	PC-5p-35960_37	ACAGCCTCTGGCATGTTGG	19	1	-	130386251	130386312	gaACAGCCTCTGGCATTTTGGgagtcctgtttacagtctctctttgatcagtcattggcagt	0						5'	New	gp4	.....(((..(((((((..(((((..(((....))).)))))...)))..))))..)))...	54	46.8	-18	15.7501	9.27515	6.19088	8.67499	4.09941	15.3163	3.85248	1.43668	0.86676	0	1.86097	0.677767	middle
99	91	PC-5p-65323_15	TAGTCTCCCATTGTCAACAGTCT	23	1	-	145957228	145957324	tcccacctgggacatctccTAGTCTCCCATTGTCAACAGTCTtaagagggtagaaGACTGGTTGGATTGGAGACTAGGagatacctcccaagtgtgc	0						5'	New	gp4	...(((.(((((.((((((((((((((.....(((((((((((..........)))))).)))))...))))))))))))))...))))).)))...	91	50.5	-46.3	1.75001	2.65004	4.12725	0	1.63976	0	2.31149	4.31003	0.86676	3.04285	4.96258	4.0666	low
209	201	PC-5p-462079_2	TTTAGCTCTGTGGGTAGGCTT	21	1	+	154076081	154076152	gattTTTAGCTCTGTGGGTAGGCTTgaggcccagagccgtgattctcaaccctcccccagaagctaaaatgc	0						5'	New	gp4	...(((((((((((.(((.(((.((((((..((......))..)))))).))).)))))).))))))))...	66	52.8	-28.4	0	0	0	3.46999	0	0	0	0	0	0	0	0	low
164	156	PC-3p-122452_6	TCCCGCAGGCTGTGCCCTTTACC	23	1	-	159473674	159473766	ggagggtctggccaggtgggggcgccttgctgtgggtgagactcagtggcacgctcTCCCGCAGGCTGTGCCCTTTACCtggggaggccctgc	0						3'	New	gp4	..(((((((..((((((..(((.((...((((((((.(((.............))).)))))).))...)))))..))))))..)))))))..	89	69.9	-49.6	0	0	0	0	0	0	3.08198	0.718339	0	1.01428	0.620322	0	low
419	411	PC-5p-159391_4	GAAAAAGAAGAAAGAAAGAAGA	22	1	-	167667128	167667217	ttagaGAAAAAGAAGAAAGGAAGAAGAggaagacacagattacaatgagataggaacttaattctttctttcttttacaattttcttaag	0						5'	New	gp4	...((((((((((((((((((((((....(((......(((.......))).....)))..)))))))))))))))....)))))))...	84	28.9	-19.8	0	0	0	0	0	0	0	1.43668	3.46704	0	0	0	low
211	203	PC-5p-165945_4	ATCCGCACGGCTGTCAGGCA	20	1	+	169146494	169146592	aaacagatgacATCCGCACGGCTGTCAGGCAgcagctccagaaagaattgatggctcttttcaataccttgctgctcagtttcgtggctgttactgaca	0						5'	New	gp4	...(((.(((((.((((...((((...((((((((.....((((((.........)))))).......))))))))))))...)))).))))))))...	93	48.5	-29.1	0	0	0	0	0	0	3.08198	0	0	0	0	0	low
129	121	PC-3p-93683_9	GGGTCCCATCTGGGGTGCCA	20	1	-	173927157	173927217	ccgggtaccccagatgtggggatgtctgttgtggagcagGGGTCCCAGCTGGGGTGCCAag	0						3'	New	gp4	...((((((((((.....(((((..(((((....)))))..)))))..))))))))))...	55	65.6	-36.4	0	0	0	0	4.91929	1.27636	0	0	0	0	0	2.0333	low
168	160	PC-3p-483770_2	ATGAAAATAGCAGGGAGAA	19	1	+	175179064	175179134	atatctaccatagtattcagcttttctccctttctcttggggaaaaaaagATGAAAATAGCAGGTAGAAaa	0						3'	New	gp4	...((((((...((.((((.(((((.(((((.......)))))..))))).)))).))....))))))...	65	33.8	-19.2	3.50002	0	0	0	0	0	0	0	0	0	0	0	low
476	468	PC-3p-472528_2	AAGATGCACTGGATTGTACT	20	1	+	178514608	178514716	cttagtggtagcaggccatgcctccctctgctttctgagattaatgctgtggtttgtccccagcacctattggtcatgcAAGAGGCACTGGATTGTACTtaccactccc	0						3'	New	gp4	...((((((((((..(((((((((....(((...(..(......(((((.((.....)).)))))....)..)....))).)))))).)))..)))...)))))))...	103	51.4	-36.8	3.50002	0	0	0	0	0	0	0	0	0	0	0	low
9	10	PC-5p-49116_24	TTGCCGTTGGGTCTGGGGTGT	21	1	-	182942496	182942586	actgcttttgctgctcCTGCCGTTGGGTCTGGGGTGTgttttcttcccctggaaaCACCCCAGACCCAATGGCAAGAagagcgaaagtcct	0						5'	New	gp4	...(((((((((..((.((((((((((((((((((((...((((......)))))))))))))))))))))))).))..)))))))))...	85	54.9	-56.9	2.62501	2.65004	2.06363	5.20499	1.63976	0	0	0	1.30014	0	0	2.71107	low
9	11	PC-3p-77802_12	CACCCCAGACCCAATGGCAAGA	22	1	-	182942496	182942586	actgcttttgctgctcCTGCCGTTGGGTCTGGGGTGTgttttcttcccctggaaaCACCCCAGACCCAATGGCAAGAagagcgaaagtcct	0						3'	New	gp4	...(((((((((..((.((((((((((((((((((((...((((......)))))))))))))))))))))))).))..)))))))))...	85	54.9	-56.9	7.00003	0	1.03181	1.735	0.819882	1.27636	2.31149	2.15502	0	4.05713	0	0.677767	low
187	179	PC-5p-349869_2	GGGTGCGTCAGGCTGTTCTT	20	1	+	185452768	185452840	aagctgggctGGGTGGGTCAGGCTGTTCTTgctggtttacctcaaagcacacgttcctatccatgtccagggt	0						5'	New	gp4	...((((((((((((((....(((((.(((...((....))...))).))).)).)))))))).))))))...	67	54.8	-27.6	0	0	0	4.33749	0	0	0	0	0	0	0	0	low
351	343	PC-5p-188776_3	AGCGGTCAGCCCTGAGAAGG	20	1	-	188410858	188410943	attgggggcggggagAGCGGTCAGCCCTGAGAAGGctggaacatcgaggcctgttcccggggcagcagtagaatcccgtcctccgt	0						5'	New	gp4	..(((((((((((...((.((..((((((.(((((((.(.....)..)))))..)).)))))).)).))....)))))))).))).	83	65.1	-37.5	0	0	0	0	0	0	0	0	4.3338	0	0	0	low
123	115	PC-3p-167786_4	TAGGTCAGTTTGAGAACCTCT	21	1	-	191456722	191456793	tgctgaagcagaggttctgaaactcacccggctcaactgagcTAGGTCAGTTTGAGAACCTCTgcttcattc	0						3'	New	gp4	...(((((((((((((((.(((((.(((..((((....))))..))).))))).)))))))))))))))...	66	50	-46.7	0	0	0	0	0	0	0	0	3.46704	0	0	0	low
485	477	PC-3p-55446_20	AGACCGGGGACCGGAGCGAGCAGT	24	1	+	201953134	201953234	gccgcgtcgtcggtgcctgcgccGCTCGCTCTTCCTCGGTTCTcccctcccggctgaAGACCGGGGACCGGAGCGAGCAGActgggaccatgttccgacgc	0						3'	New	gp4	...((((((..(((.((......(((((((((((((((((..((.((....))..))..))))))))..))))))))).....)).)))......))))))	98	71.3	-49.4	1.75001	5.30008	6.19088	1.735	7.37893	6.38181	6.16397	5.74671	6.93408	4.05713	6.20322	7.45544	low
280	272	PC-5p-25787_60	CGGCAGACTGGGACTTGTTGTT	22	1	+	212651362	212651501	gcgggacgcctggcccggctgcagtggccggcaccatgCGGCAGACTGGGACTTGTTGTTgagcgcagtgagacaacaacaaaatcactagtcttccagatggggctggctgtccatggcccattctgccaggtgttcgg	0						5'	New	gp4	...(((((((((((..((((...(..((((((.((((..((.(((((((((.(((((((((............)))))))))..)).))))))).))..)))).))))))..)....))))......)))))))))))..	135	61.4	-66.3	1.75001	0	8.2545	0	4.09941	2.55272	3.85248	5.02837	32.9369	5.07142	3.10161	25.0774	middle
203	195	PC-5p-7575_315	TTCTACAGTGGCTGTGGCT	19	1	+	215881736	215881817	ataaccactcggcattgcTTCTACAGTGGCTGTGGCTggacccccgtctcgggaacctccatatgctacagaggcagcctnn	0						5'	New	gp4	..........(((..(((((((...((((((((((..((...((((...))))..)).))))).)))))))))))))))...	69	56.1	-31.4	22.7501	21.2003	10.3181	13.88	20.497	38.2909	23.8854	11.1343	16.0351	18.7642	20.7808	6.0999	middle
23	29	ssc-miR-31_R+1	AGGCAAGATGCTGGCATAGCTGT	23	1	+	224397146	224397250	ctcctgtaacttggaactggagaggAGGCAAGATGCTGGCATAGCTGTtaaactgagaaccTGCTATGCCAACATATTGCCATCtttcttgtctgacagcagcca	10	ssc-mir-31,bta-mir-31,eca-mir-31,cfa-mir-31,hsa-mir-31,cgr-mir-31,mmu-mir-31,rno-mir-31a,mdo-mir-31,oan-mir-31,	ssc-mir-31	actggagaggAGGCAAGATGCTGGCATAGCTGttaaactgagaacctgctatgccaacatattgccatctttcttgtc	ssc-miR-31	AGGCAAGATGCTGGCATAGCTG	5'	Diff	gp2	...((((...(..((...((((((..(((((.(((.(((((((((.(((........)))..))))))))).))).)))))..))))))..))..)..))))...	99	47.6	-42.4	701.753	512.783	316.767	355.674	476.351	499.058	521.626	428.13	702.076	373.256	343.038	586.269	middle
23	30	hsa-miR-31-3p_R+1	TGCTATGCCAACATATTGCCATC	23	1	+	224397146	224397250	ctcctgtaacttggaactggagaggAGGCAAGATGCTGGCATAGCTGTtaaactgagaaccTGCTATGCCAACATATTGCCATCtttcttgtctgacagcagcca	10	ssc-mir-31,bta-mir-31,eca-mir-31,cfa-mir-31,hsa-mir-31,cgr-mir-31,mmu-mir-31,rno-mir-31a,mdo-mir-31,oan-mir-31,	hsa-mir-31	ggagaggAGGCAAGATGCTGGCATAGCTgttgaactgggaaccTGCTATGCCAACATATTGCCATctttcc	hsa-miR-31-3p	TGCTATGCCAACATATTGCCAT	3'	Diff	gp2	...((((...(..((...((((((..(((((.(((.(((((((((.(((........)))..))))))))).))).)))))..))))))..))..)..))))...	99	47.6	-42.4	17.5001	30.4755	16.509	22.555	22.9567	31.9091	14.6394	14.3668	19.9355	16.2285	19.8503	42.6993	middle
13	14	PC-5p-77175_12	ATTCCGTCTCTGGGCACCA	19	1	+	237531258	237531340	aagactgATTCCTTCTCTGGGCACCAaaacatgatttatgaggagatagtaattgaggtggtcgtaaagaataggtaggtaga	0						5'	New	gp4	...(((....(((..(((..((((((...((....((((......))))....))...)))).))..)))..)))..)))...	77	39.8	-15.3	0	0	0	30.3625	0	0	0	0	0.43338	0	0	0	middle
76	68	PC-5p-153445_4	ACGATCTCCTTCTGACCCT	19	1	+	249830951	249831021	accaATGATCTCCTTCTGACCCTcctatgaaaattagtttatagagggattccattaggttctttattatt	0						5'	New	gp4	...(((((...(((..((.((((.(((((((......)))))))))))....))..)))....)))))...	65	33.8	-15.1	0	0	0	0	3.27953	0	0	0	0	0	0	0	low
108	100	PC-3p-143568_5	CACTTCTTCCATTTTCACCAGT	22	1	-	264150067	264150152	agatggtgagtgtgggagaggaggagaggactgcccttggagaggtgcgtttagacagaatttCACTTCTTCCATTTTCACCAGGt	0						3'	New	gp4	...(((((((..(((((((((..((((.(((.((((((...)))).))))).........)))).)))))))))..)))))))...	80	50	-29.1	0	3.97506	2.06363	3.46999	0	0	1.54099	0.718339	0	2.02857	1.24064	0.677767	low
422	414	PC-3p-154257_4	CATTGCTGTGGCTGTGGCT	19	1	-	278516779	278516857	tttccactctggtcatagcaatgcttctaaaattgtcatttaaaaaaatgcctatttggCATTGCTGTGGCTGTGGCGn	0						3'	New	gp4	...((((...(((((((((((((((....((((...(((((....)))))...)))))))))))))))))))))))...	73	39.2	-28.4	0	2.65004	3.09544	1.735	0	2.55272	0.770496	2.15502	0.86676	0	0.620322	0	low
108	134	ssc-mir-4331-p3_1ss21TC	TGGCATTGCTGTGGCTGTGGC	21	1	-	278516783	278516861	tttccactctggtcatagcaatgcttctaaaattgtcatttaaaaaaatgcctattTGGCATTGCTGTGGCTGTGGCgn	1	ssc-mir-4331,	ssc-mir-4331	ccatgagctatggcgtagatcacagacacagctcagatctggcattgcTGTGGCTGTGGTGTAGGCCAGCagctttgctc	ssc-mir-4331-p3	tggcattgcTGTGGCTGTGGT	3'	New	gp2	...((((...(((((((((((((((....((((...(((((....)))))...)))))))))))))))))))))))...	73	39.2	-28.4	0	6.6251	0	0	0.819882	0	2.31149	0.718339	1.73352	0	0	0	low
45	60	ssc-miR-181a_R-1	AACATTCAACGCTGTCGGTGAGT	23	1	+	299322135	299322239	gactcagtcttcagagaactccaaggAACATTCAACGCTGTCGGTGAGTttgggatttgaaaaaACCACCGACCGTTGACTGTACCttggggttcttactgacaa	53	ssc-mir-181a-2,ssc-mir-181a-1,ssc-mir-181b-2,ssc-mir-181b-1,bta-mir-181a-1,bta-mir-181a-2,bta-mir-181b-2,bta-mir-181b-1,oar-mir-181a-1,oar-mir-181a-2,eca-mir-181a,eca-mir-181a-2,eca-mir-181b,cfa-mir-181a-1,cfa-mir-181a-2,cfa-mir-181b-1,cfa-mir-181b-2,hsa-mir-181a-1,hsa-mir-181a-2,hsa-mir-181b-1,ptr-mir-181b-1,ptr-mir-181b-2,ppy-mir-181b,ppy-mir-181b-2,ggo-mir-181a-1,ggo-mir-181a-2,mml-mir-181a-2,…	ssc-mir-181a-1	gagtttagaggttgcttcagtgAACATTCAACGCTGTCGGTGAGTTtggaattcaaatcaaaaccatcgaccgttgattgtaccctatggccaaccatcagctc	ssc-miR-181a	AACATTCAACGCTGTCGGTGAGTT	5'	Diff	gp2	...(((((.....(((((((((((((.(((.((((((..(((((((.((((...........))))))))))))))))).))).))))))))))))))))))...	99	46.7	-49.8	146294	158484	180262	125382	176741	121953	222814	222431	206531	408440	180409	95619.4	high
45	61	hsa-miR-181a-3p_2ss5TC16TC	ACCACCGACCGTTGACTGTACC	22	1	+	299322135	299322239	gactcagtcttcagagaactccaaggAACATTCAACGCTGTCGGTGAGTttgggatttgaaaaaACCACCGACCGTTGACTGTACCttggggttcttactgacaa	53	ssc-mir-181a-2,ssc-mir-181a-1,ssc-mir-181b-2,ssc-mir-181b-1,bta-mir-181a-1,bta-mir-181a-2,bta-mir-181b-2,bta-mir-181b-1,oar-mir-181a-1,oar-mir-181a-2,eca-mir-181a,eca-mir-181a-2,eca-mir-181b,cfa-mir-181a-1,cfa-mir-181a-2,cfa-mir-181b-1,cfa-mir-181b-2,hsa-mir-181a-1,hsa-mir-181a-2,hsa-mir-181b-1,ptr-mir-181b-1,ptr-mir-181b-2,ppy-mir-181b,ppy-mir-181b-2,ggo-mir-181a-1,ggo-mir-181a-2,mml-mir-181a-2,…	hsa-mir-181a-1	tgagttttgaggttgcttcagtgAACATTCAACGCTGTCGGTGAGTttggaattaaaatcaaaACCATCGACCGTTGATTGTACCctatggctaaccatcatctactcca	hsa-miR-181a-3p	ACCATCGACCGTTGATTGTACC	3'	Diff	gp2	...(((((.....(((((((((((((.(((.((((((..(((((((.((((...........))))))))))))))))).))).))))))))))))))))))...	99	46.7	-49.8	706.128	665.823	757.867	598.574	453.804	421.838	548.979	358.092	637.069	482.292	249.059	445.632	middle
47	63	ssc-miR-181b_R-1	AACATTCATTGCTGTCGGTGGGT	23	1	+	299324012	299324098	tgatggctgcactcAACATTCATTGCTGTCGGTGGGTttgagtctgaatcaaCTCACTGATCAATGAATGCAAactgcggaccaaac	35	ssc-mir-181b-2,ssc-mir-181b-1,ssc-mir-181d,bta-mir-181b-2,bta-mir-181b-1,bta-mir-181d,eca-mir-181b,cfa-mir-181b-1,cfa-mir-181b-2,cfa-mir-181d,hsa-mir-181b-1,hsa-mir-181d,ptr-mir-181b-1,ptr-mir-181b-2,ptr-mir-181d,ppy-mir-181b,ppy-mir-181b-2,ppy-mir-181d,ggo-mir-181d,mml-mir-181b-1,mml-mir-181d,cgr-mir-181b,cgr-mir-181d,mmu-mir-181b-2,mmu-mir-181b-1,mmu-mir-181d,rno-mir-181b-2,rno-mir-181b-1,rno-m…	ssc-mir-181b-1	ggtcacaatcAACATTCATTGCTGTCGGTGGGTTgaactgtgtagacaagctcactgaacaatgaatgcaactgtggccc	ssc-miR-181b	AACATTCATTGCTGTCGGTGGGTT	5'	Diff	gp2	...((((((((.....(((((((((..(((((((((((.((.......)))))))))))))))))))))).....))))).)))...	81	46	-34.7	32588.6	32142.4	45879.6	38865.7	39222.3	30735.4	48585.2	39639.7	45500.1	56193.3	37254.7	31928.3	high
47	64	hsa-miR-181b-3p	CTCACTGAACAATGAATGCAA	21	1	+	299324012	299324098	tgatggctgcactcAACATTCATTGCTGTCGGTGGGTttgagtctgaatcaaCTCACTGATCAATGAATGCAAactgcggaccaaac	35	ssc-mir-181b-2,ssc-mir-181b-1,ssc-mir-181d,bta-mir-181b-2,bta-mir-181b-1,bta-mir-181d,eca-mir-181b,cfa-mir-181b-1,cfa-mir-181b-2,cfa-mir-181d,hsa-mir-181b-1,hsa-mir-181d,ptr-mir-181b-1,ptr-mir-181b-2,ptr-mir-181d,ppy-mir-181b,ppy-mir-181b-2,ppy-mir-181d,ggo-mir-181d,mml-mir-181b-1,mml-mir-181d,cgr-mir-181b,cgr-mir-181d,mmu-mir-181b-2,mmu-mir-181b-1,mmu-mir-181d,rno-mir-181b-2,rno-mir-181b-1,rno-m…	hsa-mir-181b-1	cctgtgcagagattattttttaaaaggtcacaatcAACATTCATTGCTGTCGGTGGGTtgaactgtgtggacaagCTCACTGAACAATGAATGCAActgtggccccgctt	hsa-miR-181b-3p	CTCACTGAACAATGAATGCAA	3'	Yes	gp2	...((((((((.....(((((((((..(((((((((((.((.......)))))))))))))))))))))).....))))).)))...	81	46	-34.7	78.7504	55.6509	46.4316	85.0149	44.2736	72.7527	44.6888	28.7336	38.1375	25.3571	62.6525	82.6876	middle
181	173	PC-3p-130389_5	CAGCCTGCCCTCCTGCCTGCA	21	1	-	299413127	299413208	ttggcactaggggctggttgggaaatgggctttctctcgcttccagtgagctgttctccCAGCCTGCCCTCCTGCGTGCAtt	0						3'	New	gp4	...(((((((((((.((((((((...(..(.....(((((.....)))))..)..))))))))).))))..))).))))...	76	58.5	-37.4	0	0	0	0	0	0	0	3.59169	0	0	0	0	low
152	144	PC-5p-95103_9	AAGGGGTCTGTTCTCTCCCTGA	22	1	+	301364137	301364264	tttgctaatcgggtatagagtatgccttttcctgtcagactgcctaagtAAGGGGTCTGTTCTCTCCCTGAagcacttgctccactcctgtcaaagccgtgtgcctcagggggaggctggaccccaag	0						5'	New	gp4	..........(((((((...)))))))...........(((.....)))..(((((((..(((((((((((.((((..(((..((....))...)))...)))).)))))))))))..)))))))...	74	53.9	-50.5	3.50002	2.65004	1.03181	3.46999	0.819882	1.27636	6.16397	4.31003	5.20056	0	3.10161	4.74437	low
358	350	PC-5p-245349_2	AACACAGACTGCTCCCTG	18	1	-	301631105	301631215	ggaggtactgagagtggaaagggcaccaagAACACAGACTGCTCCCTGctccgccgtcagaaggacagctggtctgtaggtgtgggcctcaccccaccctgaggtacctgt	0						5'	New	gp4	..(((((((.((.((((...((((.(((.....((((((((((.(((.((........)).)))..))).))))))).....)))))))....)))).))..)))))))..	107	60.4	-42.6	0	0	0	3.46999	0	0	0	0	0	0	0	0	low
488	480	PC-5p-56290_19	CCTTGACTTTACTCAGCAGCC	21	1	-	302323756	302323847	aaagttcagtgtagctgcCCTTGACTTTACTCAGCAGCCcctggagaaagccctggctgttgtgaggagtcagccacagctgcctgaatcaa	0						5'	New	gp4	...((((((.(((((((...(((((((....((((((((...((......))..))))))))....)))))))...)))))))))))))...	86	53.3	-40.5	0	2.65004	6.19088	3.46999	4.91929	3.82909	3.08198	4.31003	2.60028	8.11426	4.34225	4.0666	low
110	136	ssc-mir-4332-p5_1ss1TC	CGGGGCCGGGGGTGGGGCC	19	1	-	302579940	302580008	cttgagggCGGGGCCGGGGGCGGGGCCtgggcaccaggtctcagaagcccccctcctctgctcctcccc	2	ssc-mir-4332,mmu-mir-5126,	ssc-mir-4332	cggcggggggtgtcgcgggggtgggcgggctggggccgggggtggggccggcgggggcacgacccccggtcggcgtcCACGGCCGCCGCCGGGCGCCtttccaccgc	ssc-mir-4332-p5	tggggccgggggtggggcc	5'	New	gp2	...((((((((((..(((((((((((((((...)))))))))....))))))..)).)))).))))...	63	76.8	-42.1	1.75001	3.97506	3.09544	5.20499	3.27953	14.04	3.85248	4.31003	4.3338	6.0857	2.48129	2.71107	middle
70	90	bta-miR-219-5p_R+2_1ss22TC	TGATTGTCCAAACGCAATTCTCGT	24	1	-	302806874	302806984	ggggcccttaactcaggggcttcgccacTGATTGTCCAAACGCAATTCTTGTacgagtctgcggccaaccgAGAATTGTGGCTGGACATCTGTggctgagctccgggcgca	20	ssc-mir-219b,ssc-mir-219a,bta-mir-219-1,bta-mir-219-2,eca-mir-219-2,eca-mir-219-1,cfa-mir-219-1,cfa-mir-219-2,hsa-mir-219a-1,ptr-mir-219-2,ptr-mir-219-1,ppy-mir-219-1,mml-mir-219-1,mmu-mir-219a-1,mmu-mir-219a-2,rno-mir-219a-1,rno-mir-219a-2,mdo-mir-219-2,mdo-mir-219-1,oan-mir-219,	bta-mir-219-1	actcaggagcttcgccacTGATTGTCCAAACGCAATTCTTgtacgagtctgcggccaaccgAGAATTGTGGCTGGACATCTGtggctgagctctgg	bta-miR-219-5p	TGATTGTCCAAACGCAATTCTT	5'	Diff	gp2	...((((........((((((..(((((.((.((((((..(((((((((((.....((.....))....)))))))))))..)))))))).)))))..))))))))))...	105	58.6	-53.3	56.0003	72.2136	31.4703	42.5074	52.8824	38.9291	39.2953	32.3252	44.6382	38.0356	38.46	50.4936	middle
70	91	ssc-miR-219b-3p_R+2_1ss10GC	AGAATTGTGCCTGGACATCTGT	22	1	-	302806874	302806984	ggggcccttaactcaggggcttcgccacTGATTGTCCAAACGCAATTCTTGTacgagtctgcggccaaccgAGAATTGTGGCTGGACATCTGTggctgagctccgggcgca	20	ssc-mir-219b,ssc-mir-219a,bta-mir-219-1,bta-mir-219-2,eca-mir-219-2,eca-mir-219-1,cfa-mir-219-1,cfa-mir-219-2,hsa-mir-219a-1,ptr-mir-219-2,ptr-mir-219-1,ppy-mir-219-1,mml-mir-219-1,mmu-mir-219a-1,mmu-mir-219a-2,rno-mir-219a-1,rno-mir-219a-2,mdo-mir-219-2,mdo-mir-219-1,oan-mir-219,	ssc-mir-219b	ggcttcgccactgattgtccaaacgcaattcttgtacgagtctgcggccaaccgAGAATTGTGGCTGGACATCTgtggctgagc	ssc-miR-219b-3p	AGAATTGTGGCTGGACATCT	3'	Diff	gp2	...((((........((((((..(((((.((.((((((..(((((((((((.....((.....))....)))))))))))..)))))))).)))))..))))))))))...	105	58.6	-53.3	1.75001	0	0	0	2.45964	3.82909	2.31149	0	0	1.01428	0	0.677767	low
270	262	PC-5p-262371_2	TGACAGCCCGTCCCTCTTCAGT	22	1	+	305431715	305431788	ccaggcccctccagTGACAGCCCGTCCCTCTTCAGTcctctcagatggagatgaagggcttccactttgccgac	0						5'	New	gp4	...(((......((((..(((((.((..((((((.((......)))))))).)).)))))..))))..)))...	68	60.8	-23.1	0	0	0	3.46999	0.819882	0	0	0	0	1.01428	0	0	low
398	390	PC-5p-47671_25	CGAGAGAGGGGCCCGTGC	18	1	-	308138873	308138930	gatggtctcaaGGAGAGAGGGGCCCGTGCtccccaaagcagctccctccagagccccc	0						5'	New	gp4	...((.(((..((((...(((((...((((......))))))))))))).)))))...	52	67.2	-19.4	1.75001	1.32502	2.06363	1.735	4.09941	8.93454	2.31149	0.718339	0.86676	2.02857	6.20322	0	low
96	122	hsa-mir-1244-3-p3	TTTGTATGAGATGGTTAA	18	1	-	312561658	312561731	ttgctttataatcacctcaaattaacttagccatactataagtagttggTTTGTATGAGATGGTTAAaaaggat	8	eca-mir-1244,hsa-mir-1244-3,ptr-mir-1244-7,ptr-mir-1244-9,ptr-mir-1244-4,ptr-mir-1244-1,ptr-mir-1244-5,ptr-mir-1244-8,	hsa-mir-1244-3	atcttattccgagcattccagtaacttttttgtgtatgtacttagctgtactatAAGTAGTTGGTTTGTATGAGATGGTTaaaaa	hsa-mir-1244-3-p3	TTTGTATGAGATGGTTaa	3'	New	gp2	...((((.((((((.((((.....((..(((((.((((....))))))))).)).)))).)))))).))))...	68	29.7	-17.3	3.50002	1.32502	1.03181	0	4.09941	1.27636	0	1.43668	1.73352	0	0	0.677767	low
31	41	mmu-miR-126b-5p_L+1R-1	CATTATTACTCACGGTACGAGT	22	1	-	313734617	313734720	tcggtgctgggctgccgacagcgCATTATTACTCACGGTACGAGTttgaagtgtcacagCGCGTACCAAAAGTAATAATGTcccgtcgccagcgcgagcgctgt	2	mmu-mir-126b,rno-mir-126b,	mmu-mir-126b	ATTATTACTCACGGTACGAGTTtgaagtgtcacagCGCGTACCAAAAGTAATAATGTG	mmu-miR-126b-5p	ATTATTACTCACGGTACGAGTT	5'	Diff	gp2	.((((((((.((((.((((...(((((((((((...((((((.((((((....))).))).))))))...)))))))))))...)))).)))).).))))))).	102	55.8	-48.8	7.00003	0	5.15907	3.46999	2.45964	1.27636	0	2.15502	4.3338	4.05713	1.86097	3.38884	low
31	42	mmu-miR-126b-3p_R-1	CGCGTACCAAAAGTAATAATGT	22	1	-	313734617	313734720	tcggtgctgggctgccgacagcgCATTATTACTCACGGTACGAGTttgaagtgtcacagCGCGTACCAAAAGTAATAATGTcccgtcgccagcgcgagcgctgt	2	mmu-mir-126b,rno-mir-126b,	mmu-mir-126b	ATTATTACTCACGGTACGAGTTtgaagtgtcacagCGCGTACCAAAAGTAATAATGTG	mmu-miR-126b-3p	CGCGTACCAAAAGTAATAATGTG	3'	Diff	gp2	.((((((((.((((.((((...(((((((((((...((((((.((((((....))).))).))))))...)))))))))))...)))).)))).).))))))).	102	55.8	-48.8	31.5001	5.30008	31.9862	13.88	13.1181	12.7636	3.85248	15.0851	8.6676	0	9.92515	6.0999	middle
30	39	ssc-miR-126-5p	CATTATTACTTTTGGTACGCG	21	1	+	313734653	313734763	acagcgctcgcgctggcgacgggaCATTATTACTTTTGGTACGCGctgtgacacttcaaacTCGTACCGTGAGTAATAATGCGctgtcggcagcccagcaccgagagcacg	14	ssc-mir-126,bta-mir-126,eca-mir-126,cfa-mir-126,hsa-mir-126,ptr-mir-126,ppy-mir-126,mml-mir-126,cgr-mir-126,mmu-mir-126a,rno-mir-126a,mdo-mir-126,sha-mir-126,oan-mir-126,	ssc-mir-126	cgacgggaCATTATTACTTTTGGTACGCGctgtgacacttcaaacTCGTACCGTGAGTAATAATGCGctgtcg	ssc-miR-126-5p	CATTATTACTTTTGGTACGCG	5'	Yes	gp2	...((.((((.(((((((((((..((((((((((..(((((((.....(((....)))....)))))))..))))))))))..)))))).....)))))..)))).))...	105	56.8	-48.1	3437.02	3005.15	4223.21	4486.7	3485.32	2255.33	5559.13	4580.85	2422.59	7974.29	4468.8	2378.96	middle
30	40	ssc-miR-126-3p	TCGTACCGTGAGTAATAATGCG	22	1	+	313734653	313734763	acagcgctcgcgctggcgacgggaCATTATTACTTTTGGTACGCGctgtgacacttcaaacTCGTACCGTGAGTAATAATGCGctgtcggcagcccagcaccgagagcacg	14	ssc-mir-126,bta-mir-126,eca-mir-126,cfa-mir-126,hsa-mir-126,ptr-mir-126,ppy-mir-126,mml-mir-126,cgr-mir-126,mmu-mir-126a,rno-mir-126a,mdo-mir-126,sha-mir-126,oan-mir-126,	ssc-mir-126	cgacgggaCATTATTACTTTTGGTACGCGctgtgacacttcaaacTCGTACCGTGAGTAATAATGCGctgtcg	ssc-miR-126-3p	TCGTACCGTGAGTAATAATGCG	3'	Yes	gp2	...((.((((.(((((((((((..((((((((((..(((((((.....(((....)))....)))))))..))))))))))..)))))).....)))))..)))).))...	105	56.8	-48.1	1874.26	1183.24	1469.3	2312.75	1367.56	999.392	1598.78	1267.87	817.355	1767.9	1207.15	920.408	middle
475	467	PC-5p-51369_22	TCATGCCGGCTCTTGGCTCAGT	22	2	-	145468	145550	nnntgcTCATGCCGGCTCTTGGCTCAGGtgttcggcatgatcttcacgtgctgcctgtacaagagcctgaagctggagcacta	0						5'	New	gp4	...(((((..((.((((((((...(((((....((((((.......)))))))))))..))))))))....))..)))))...	77	54.2	-35.6	0	2.65004	3.09544	1.735	4.09941	3.82909	3.85248	4.31003	3.46704	2.02857	1.86097	0	low
407	399	PC-3p-159473_4	CTGACCTGCCACCCCACCCACA	22	2	-	157559	157641	acgGTGGGTGGGGCGGGCGGGTGGCGTCaaggaggggggccctggctgcagctccctgaCTGACCTGCCACCCCACCCACAgc	0						3'	New	gp4	...((((((((((..(((((((...((((.((((...(((....)))....)))).))))..))))))).))))))))))...	77	74.7	-50.7	1.75001	3.97506	2.06363	3.46999	1.63976	6.38181	1.54099	1.43668	0	2.02857	0	0	low
376	368	PC-5p-35107_38	AAGTAGGGCCCCTTGCCGTTGCT	23	2	-	3032547	3032625	gtggagcggacAAGTAGGGCCCCTTGCCGTTGCTgagttaactgcccttagcagcggggggacttactctctgctcnnn	0						5'	New	gp4	...(((((((..((((((.((((...(((((((((((.........))))))))))))))).)))))).)))))))...	73	58.2	-40.1	8.75004	1.32502	0	3.46999	5.73917	1.27636	11.5574	15.8035	11.2679	11.1571	15.5081	9.48874	middle
418	410	PC-5p-100816_8	CCCTTCCCGGGGTGTGGGG	19	2	+	3795990	3796069	acatgctgCCCTTCCCGGGGTGGGGGGcttgcatttttcaaaggcagcaggctgtccagccagaccgaagtggtgcaatc	0						5'	New	gp4	...(((.(((((((...((.(((..(((((((..............)))))))..))).)).....)))).))))))...	74	60	-30.2	1.75001	0	0	3.46999	0.819882	0	0.770496	2.15502	0	0	0.620322	0	low
145	137	PC-5p-115333_6	TCTCCCATCCTGTTCTTTGGCT	22	2	+	3975044	3975141	gacccggagggcctcaggccctgcTCTCCCATCCTGTTCTTTGGCTcgtgaccaccagccagagccaggtctgggacagtgggtgaaggagccggaac	0						5'	New	gp4	...((((....(((...((((.(((.(((((.((((..((((((((.((....)).)))))))).))))..))))).)))))))..)))..))))...	92	65.3	-46.5	0	0	0	0	0	0	0	0.718339	0	5.07142	0.620322	0	low
74	66	PC-5p-1655196_1	ATCTGTTTCAGTCAGGAGAG	20	2	-	4006241	4006314	cacggATCTGTTTCAGTCAGGAGAGgctcagcgtgagggctctgcagccttttctaagacagaaacatgcctgc	0						5'	New	gp4	...((...((((((.((((((((((((((((.((....)).))).))))))))))..))).))))))..))...	68	54.1	-29.2	0	0	0	3.46999	0	0	0	0	0	0	0.620322	0.677767	low
246	238	PC-5p-378766_2	TGAAGAGCTTTTAGTGGGC	19	2	-	6104644	6104722	nnngtaatgttgaTGAAGAGCTTTTAGTGGGAtggggaatgttgacactatgctactaaacagtatttataattacatt	0						5'	New	gp4	.....(((((..(((((..(((((((((((.((((............)))).)))))))).))).)))))....)))))	74	31.6	-18.3	0	0	0	3.46999	0	0	0	0	0	0	0	0	low
56	74	ssc-miR-192	CTGACCTATGAATTGACAGCC	21	2	+	6416956	6417083	gtcggcaggctgccaagaccgagtgcacagggctCTGACCTATGAATTGACAGCCagtgctctcatctcccctctggCTGCCAATTCCATAGGTCACaggtatgttcgcctcaatgccagcctccagg	41	ssc-mir-192,ssc-mir-215,bta-mir-192,bta-mir-215,eca-mir-192,eca-mir-215,cfa-mir-192,hsa-mir-192,hsa-mir-215,ptr-mir-192,ptr-mir-215,ppy-mir-215,ggo-mir-192,ggo-mir-215,mml-mir-192,mml-mir-215,cgr-mir-192,cgr-mir-215,mmu-mir-192,rno-mir-192,mdo-mir-215,oan-mir-192,oan-mir-215,	ssc-mir-192	gcacagggctCTGACCTATGAATTGACAGCCagtgctctcatctcccctctggctgccaattccataggtcacaggtatg	ssc-miR-192	CTGACCTATGAATTGACAGCC	5'	Yes	gp2	...((.((((((.((.....(((.(((((..(((.((((((((((((((.(((((((................))))))).))))).)))))))))..))).)))..)))))..)).))))))))...	122	57.8	-50.7	176.751	222.604	289.939	162.222	194.722	195.922	306.657	466.202	373.574	453.385	334.354	210.447	middle
370	362	PC-3p-7739_307	TTTGTTGGCTCCTCTGAAGTGAT	23	2	-	7444656	7444745	tttaggttcctttttcactctccgaggggccttcaagggcaagttcttgtcaccTTTGTTGGCTCCTCTGAAGTGAGaaggaaaccttcc	0						3'	New	gp4	...(((((.((((((((((.((.((((((((..(((((((((....)))...))))))..)))))))).)))))))))))).)))))...	84	48.9	-42.7	24.5001	39.7506	35.0816	19.085	22.1368	21.6982	54.7052	49.5654	38.1375	67.957	34.1177	16.9442	middle
120	146	ssc-miR-7142-5p	ACTCTCCGAGGGGCCTTCAAGGG	23	2	-	7444657	7444746	tttaggttcctttttcACTCTCCGAGGGGCCTTCAAGGGcaagttcttgtcaccTTTGTTGGCTCCTCTGAAGTGAgaaggaaaccttcc	1	ssc-mir-7142,	ssc-mir-7142	ACTCTCCGAGGGGCCTTCAAGGGcaagttcttgtcaccTTTGTTGGCTCCTCTGAAGTGA	ssc-miR-7142-5p	ACTCTCCGAGGGGCCTTCAAGGG	5'	Yes	gp2	...(((((.((((((((((.((.((((((((..(((((((((....)))...))))))..)))))))).)))))))))))).)))))...	84	48.9	-42.7	1.75001	0	2.06363	1.735	2.45964	3.82909	0.770496	2.15502	0	1.01428	5.5829	4.0666	low
120	147	ssc-miR-7142-3p	TTTGTTGGCTCCTCTGAAGTGA	22	2	-	7444657	7444746	tttaggttcctttttcACTCTCCGAGGGGCCTTCAAGGGcaagttcttgtcaccTTTGTTGGCTCCTCTGAAGTGAgaaggaaaccttcc	1	ssc-mir-7142,	ssc-mir-7142	ACTCTCCGAGGGGCCTTCAAGGGcaagttcttgtcaccTTTGTTGGCTCCTCTGAAGTGA	ssc-miR-7142-3p	TTTGTTGGCTCCTCTGAAGTGA	3'	Yes	gp2	...(((((.((((((((((.((.((((((((..(((((((((....)))...))))))..)))))))).)))))))))))).)))))...	84	48.9	-42.7	1284.51	1669.53	1009.11	706.144	960.081	701.999	1569.5	1494.14	1180.53	2052.91	1406.89	807.898	middle
272	264	PC-3p-68400_14	TTCCCACTGTCCCTACCT	18	2	+	12919978	12920040	tctgggtggaaaagcctggggagattttctggattgccttgtTTCCCACTGGCCCTACCTtag	0						3'	New	gp4	...((((((....(((..(((((((.....((....))..)))))))...))).))))))...	57	52.4	-21.9	0	3.97506	1.03181	1.735	1.63976	5.10545	4.62298	0	0	0	0	0	low
158	150	PC-5p-221013_3	GGTAGGATGCCGGGCTGG	18	2	+	17307761	17307816	gcggcGGTAGGATGCCGGGCTGGgcctcccaggctcctcccgggcctacctgcaag	0						5'	New	gp4	...((((((((...(((((..(((((.....)))))..))))).)))))).))...	50	75	-30.7	0	0	3.09544	0	0	0	0	0	0	0	0	0	low
92	118	hsa-miR-670-3p_R+3	TTTCCTCATATTCATTCAGGAGTG	24	2	-	20399886	20399980	ttcggggtggatctgacatccctgagtgtatgtggtgaacctgaatttgccttgggTTTCCTCATATTCATTCAGGAGTGtcagttcccccttca	5	bta-mir-670,eca-mir-670,hsa-mir-670,ptr-mir-670,mml-mir-670,	hsa-mir-670	gtttaggggtggacctgatGTCCCTGAGTGTATGTGGTGaacctgaatttgccttgggTTTCCTCATATTCATTCAGGAgtgtcagttgccccttcac	hsa-miR-670-3p	TTTCCTCATATTCATTCAGGA	3'	Diff	gp2	...((((.(((.((((((..((((((((.((((((..((((..(.......)..))))..).))))).))))))))..)))))).)))))))...	89	48.4	-47.9	0	0	2.06363	3.46999	0	1.27636	0.770496	0	1.73352	2.02857	0.620322	0	low
408	400	PC-3p-472146_2	ACACGTGCTACAATGGATG	19	2	-	41723713	41723772	aatccccttcatctagcattgttatatgtaaatgtaACACCTGCTACAATGGATGggcag	0						3'	New	gp4	...(((.(((((.(((((.((((((((....))))))))..)))))..))))).)))...	54	40	-19.3	0	0	0	6.93999	0	0	0	0	0	0	0	0	low
446	438	PC-5p-182189_3	TCTGCTCTGGATGTCTGCTTCA	22	2	+	42961934	42961997	TCTGCTCTGGATGTCTGCTTCAttctcactagaacagaatgaagccacaaatcttcagggcagc	0						5'	New	gp4	.(((((((((((((..((((((((((.........)))))))))).)))....)))))))))).	62	46.9	-26.5	0	0	0	0	0	0	0	0	0	3.04285	0	0.677767	low
117	109	PC-3p-340401_2	TCCGCCCCGCGCGTCGGCG	19	2	+	45220418	45220514	tttgggggcaccggtcgttgggagtgcgggggaggggaagtgggcaaaggcgacctcgccaccagtTCCGCCCCGCGCGTCGGCCcctccccccacc	0						3'	New	gp4	..((((((....(((((......((((((((....((((.(((.....((((....)))).))).)))).))))))))..)))))....))))))..	93	74.2	-50.7	3.50002	0	0	0	0	0	0	0	0	0	0	0	low
83	75	PC-5p-62400_16	GAGGTGGAGCATGAGCGC	18	2	-	51892732	51892813	cttggtgGAGGTGGAGCAGGAGCGCccttggggacccggaggaataggtcacgtgcgcgcagtcgagtctgtctccaccctc	0						5'	New	gp4	...((((((((..((...((.((((...((..((((..........)))).))...))))..))...))..))))))))...	76	65.9	-31.3	1.75001	3.97506	0	1.735	0	3.82909	6.16397	0	0	1.01428	1.24064	0	low
420	412	PC-3p-223323_3	TGGACCTGGCGCTGGGCGATAGC	23	2	-	53790912	53790993	ggcgctcgcttccgcctggcccaggacggggacctgtaccgcctcaccatccTGGACCTGGCGCTGGGCGATAGCgggcagt	0						3'	New	gp4	...(((((((..((((..(((((((.(((((..................)))))..))))).))..))))..)))))))...	76	72	-44.8	0	0	0	0	0	0	0	0	0	3.04285	0	0	low
109	101	PC-3p-49848_23	TTCCCTCCTGCTGGTACTCCCT	22	2	-	58934959	58935041	tgtgggggctctcaggagttaccagttccagggctggctgattgaacagTTCCCTCCTGCTGGTACTCCCCagcgtcccctct	0						3'	New	gp4	...((((((.((..((((.(((((((...((((...((((......)))).))))...)))))))))))..)).))))))...	77	60.2	-40	0	1.32502	6.19088	3.46999	5.73917	3.82909	6.16397	2.87336	2.60028	6.0857	6.20322	4.74437	low
224	216	PC-5p-116742_6	TTCGGGTGCAGGGACTGAGAGC	22	2	+	59066319	59066398	tcaggtggtcgaTTCGGGTGCAGGGACTGAGAGCtgggaccgtagcctcaggacccccacctgccacagaggccaccgcc	0						5'	New	gp4	...(((((((....((((((..((..(((((.((((......)))))))))..))..)))))).......)))))))...	74	67.5	-39.2	0	0	1.03181	1.735	0	0	1.54099	0.718339	6.06732	2.02857	1.24064	0	low
219	211	PC-5p-306935_2	TGGCCGGACCGGCAGGACCA	20	2	-	60989136	60989224	atcTGGCCGGACCGGCAGGACCActgttttgttgccattctgttgaatgtgtcagtttgagtgttcctggatttttgtcttggtcaatc	0						5'	New	gp4	...(((((((((..((((((.(((((..(((..(((((((....))))).)))))..).)))).)))))....)..))).))))))...	83	47.2	-25.9	0	0	0	3.46999	0	0	0	0	0	0	0	0	low
316	308	PC-3p-318217_2	TGGGCCCGGGCTCAGCTCTCAC	22	2	+	65114896	65114966	cggGTAAGAGCTGAGCCTGGGGTGGAGGtgcagaccaaaaggcaccTGGGCCCGGGCTCAGCTCTCACagg	0						3'	New	gp4	...((.(((((((((((((((.(..((((((..........))))))..)))))))))))))))).))...	65	66.2	-42.9	0	1.32502	0	1.735	0	1.27636	2.31149	3.95086	1.73352	0	1.86097	0.677767	low
17	16	PC-5p-43711_28	TCCTCCCGCCCCCCCGCCTCCC	22	2	+	65179427	65179490	tcTCCTCCCGCTCCCCCGCCTCCCcaagagagctatcctggtgaggccgggcagaggcgggccc	0						5'	New	gp4	......((((((.(((.(((((.(((.((......)).))).))))).)))....))))))...	55	73.4	-30.3	3.50002	8.61264	5.15907	21.6875	4.91929	12.7636	5.39347	4.31003	3.90042	5.07142	5.89306	3.38884	middle
249	241	PC-3p-346615_2	CGGATGTGGTAGAGTACT	18	2	+	65372932	65373030	cactgctcactcatcccctccattccaacacagttctgggcgcaaggagaagccctctgatcctgtggaatggacggtgaCGGATGTGGTAGAGTACTt	0						3'	New	gp4	...((((((((((((((((((((((((.((..(((..((((..........))))...)))..))))))))))).))....))))).))).)))))...	93	54.5	-37.6	3.50002	0	0	0	0	0	0	0	0	0	0	0	low
208	200	PC-3p-96497_8	TGTGCCCCTTCCCGTGCCCAGT	22	2	+	65396073	65396139	tggtgggcatccagagggggcactacaggaagtaggatagtccaTGTGCCCCTTCCCGTGCCCAGAg	0						3'	New	gp4	...(((((((...((((((((((....(((..........)))..))))))))))..)))))))...	61	61.2	-32.8	1.75001	0	3.09544	0	0	0	0	0.718339	0	0	1.86097	1.35553	low
48	65	ssc-miR-181c_R+1	AACATTCAACCTGTCGGTGAGTT	23	2	-	65553700	65553786	caagggtttgggggAACATTCAACCTGTCGGTGAGTTtgggcagctcaggcaaACCATCGACCGTTGAGTGGACCccgaggcctgga	61	ssc-mir-181c,ssc-mir-181a-1,ssc-mir-181b-2,ssc-mir-181b-1,ssc-mir-181d,bta-mir-181c,bta-mir-181a-1,bta-mir-181b-2,bta-mir-181b-1,bta-mir-181d,oar-mir-181a-1,eca-mir-181a-2,eca-mir-181b,cfa-mir-181c,cfa-mir-181a-1,cfa-mir-181b-2,cfa-mir-181b-1,cfa-mir-181d,hsa-mir-181c,hsa-mir-181a-1,hsa-mir-181b-1,hsa-mir-181d,ptr-mir-181b-2,ptr-mir-181b-1,ptr-mir-181d,ppy-mir-181c,ppy-mir-181b-2,ppy-mir-181b,ppy…	ssc-mir-181c	caagggtttgggggAACATTCAACCTGTCGGTGAGTttgggcagctcaggcaaaccatcgaccgttgagtggaccccgaggcctgga	ssc-miR-181c	AACATTCAACCTGTCGGTGAGT	5'	Diff	gp2	...(((..(.((((..((((((((..(((((((.(((((((....))...)))))))))))).))))))))..)))).)..)))...	81	58.6	-41.7	22536.6	22978.5	52710.2	30520.3	32705.9	14084.7	67748.2	62556.5	54252.3	119295	40494.6	28459.4	high
48	66	hsa-miR-181c-3p_L-1R+1	ACCATCGACCGTTGAGTGGACC	22	2	-	65553700	65553786	caagggtttgggggAACATTCAACCTGTCGGTGAGTTtgggcagctcaggcaaACCATCGACCGTTGAGTGGACCccgaggcctgga	61	ssc-mir-181c,ssc-mir-181a-1,ssc-mir-181b-2,ssc-mir-181b-1,ssc-mir-181d,bta-mir-181c,bta-mir-181a-1,bta-mir-181b-2,bta-mir-181b-1,bta-mir-181d,oar-mir-181a-1,eca-mir-181a-2,eca-mir-181b,cfa-mir-181c,cfa-mir-181a-1,cfa-mir-181b-2,cfa-mir-181b-1,cfa-mir-181d,hsa-mir-181c,hsa-mir-181a-1,hsa-mir-181b-1,hsa-mir-181d,ptr-mir-181b-2,ptr-mir-181b-1,ptr-mir-181d,ppy-mir-181c,ppy-mir-181b-2,ppy-mir-181b,ppy…	hsa-mir-181c	cggaaaatttgccaagggtttgggggAACATTCAACCTGTCGGTGAGTttgggcagctcaggcaAACCATCGACCGTTGAGTGGACcctgaggcctggaattgccatcct	hsa-miR-181c-3p	AACCATCGACCGTTGAGTGGAC	3'	Diff	gp2	...(((..(.((((..((((((((..(((((((.(((((((....))...)))))))))))).))))))))..)))).)..)))...	81	58.6	-41.7	2771.14	2831.57	6027.34	4961.22	3361.1	1733.94	8004.3	6123.12	5477.06	10794.5	4164.53	3495.58	high
236	228	PC-5p-197384_3	AGGGTGAGAGGCAGGCAAGGAG	22	2	+	66657391	66657520	gcaggtccagggccagcccaagtaggtagtgcAGGGTGAGAGGCAGGCAAGGAGccacccttagatgggccagcccttagcctttctcctaccccaccccagtacatgctgcagaggacccaggaccacg	0						5'	New	gp4	...(((((.(((((......((((.(((.((..((((..(((..((((((((.((..(((......)))...)))))).))))..)))..)))).....)).))).)))).....)).))).)))))...	124	63.1	-55.1	0	0	0	0	0	0	0	0	0	3.04285	0	0	low
107	99	PC-3p-179623_3	ACTCTCACCTGCCCTGGCCCCA	22	2	+	66720734	66720801	ccaggccagggagtgggcatgagaagcagctggggtcccttacctgACTCTCACCTGCCCTGGCCCCA	0						3'	New	gp4	...((((((((...((...(((((..(((.(..(....)..).)))..)))))))..))))))))...	62	66.2	-31.9	1.75001	0	0	1.735	0	1.27636	0.770496	0	1.73352	0	4.96258	0	low
102	94	PC-3p-28966_51	TGCCTCTGCCTGCCCTGCCAGT	22	2	-	69296233	69296309	cagtggccagggtggtggcggcagtggcggggggtgcggcagtcccgtctgagcTGCCTCTGCCTGCCCTGCCAGGa	0						3'	New	gp4	...(((.((((((((..(.(((((((((((((..........)))))))...)))))).)..)).)))))))))...	71	74	-44.1	7.00003	3.97506	9.28632	10.41	2.45964	8.93454	5.39347	5.02837	6.93408	0	6.20322	6.77767	middle
137	129	PC-5p-27839_53	CGCCGAGGGCGCACCACC	18	2	+	69570825	69570887	agcgggacCGCTGAGGGCGCACCACCtgggcgcaggggtgagtgtacagcactgggtcccttt	0						5'	New	gp4	...((((((((((...((.((((.((((....)))))))).))...))))....))))))...	57	68.3	-30.2	7.00003	11.9252	13.4136	20.82	2.45964	7.65817	6.16397	1.43668	5.20056	0	2.48129	2.71107	middle
430	422	PC-5p-182422_3	CTGGCTAACTGTTCTTCTTGCC	22	2	+	69818756	69818826	acaCTGGCTAACTGTTCTTCTTGCCtttcagcccctcgagctcctctgtgagaagtccattggcacagcca	0						5'	New	gp4	...((((((((.((..(((((..(.....(((.......))).....)..)))))..))))))).)))...	65	53.5	-21.1	5.25002	1.32502	0	0	0	1.27636	0.770496	0	0	0	0	0.677767	low
372	364	PC-3p-41594_30	GATCCCTCTGCTATCCCCCAGT	22	2	+	71114328	71114400	atgaggacTGGGGGACAGCAGGGGCATCAGTgtggctggggttctGATCCCTCTGCTATCCCCCAGCcctgaa	0						3'	New	gp4	...(((.((((((((.((((((((.(((((.............))))).)))))))).)))))))).)))...	67	61.6	-41.7	7.00003	3.97506	4.12725	3.46999	2.45964	0	6.16397	0	4.3338	10.1428	4.96258	8.81097	middle
159	151	PC-3p-22245_73	CAGCACCTCCAGCTCTGCCCTCT	23	2	+	71852000	71852085	aggctgggggcatggaggggggctgtggagtgcagcatcagtgtccaaggCAGCACCTCCAGCTCTGCCCTCGtgcccaccaggct	0						3'	New	gp4	((.(((((((((((..(((((((((..(.((((.((.............)).)))))..))))))).))..))))))).)))).))	86	67.4	-47.1	1.75001	3.97506	10.3181	10.41	6.55905	7.65817	13.8689	5.74671	7.80084	9.12855	5.5829	5.42214	middle
131	123	PC-5p-33873_41	GGAAGGGCGGGAGCGGCC	18	2	-	71905655	71905726	tgggggaagGGAAGGGCGGGAGGGGCCccagggcttcccctcagcgcctccccatgccatccctgcacctgc	0						5'	New	gp4	.(((...(((((..(((((((((.((...((((....))))..)).))))))...))).)))))...)))..	69	73.6	-37.7	1.75001	1.32502	2.06363	10.41	3.27953	5.10545	3.08198	2.87336	1.73352	3.04285	3.72193	2.71107	middle
156	148	PC-5p-236318_3	TCCCAGGGCCCTCTCGAGAGAAC	23	2	-	74936492	74936614	aatgcagggctggggcctggggcccaTCCCAGGGCCCTCTCGAGAGAACcagcccatggttggatggatggtgggctcgggctgccctggatgggcctgggacagagcgcaccctcctgctgg	0						5'	New	gp4	...((((((..((((((((((((((((((.(((((...((((((...((((..((((......)))).))))...))))))..)))))))))))))))....))).))...)))))))))...	117	69.1	-67.1	0	0	0	0	0	0	0	0	0	3.04285	0	0	low
102	128	bta-mir-2904-1-p3	AGCCTCGGTTGGCCTCGG	18	2	-	75808561	75808658	cgggccgagaccagagcacagtgcttgctcaaatcagccctgctgggaggccatgtggttgatggggagtgggggaagtgAGCCTCGGTTGGCCTGGG	1	bta-mir-2904-1,	bta-mir-2904-1	acggcagcgccgcGGGAGCCTCGGTTGGCCTCggatagccggtcccccgccgtccccgccggcgggccgt	bta-mir-2904-1-p3	AGCCTCGGTTGGCCTCgg	3'	New	gp2	((((((..((((.((((((....((..(((..(((((((..(((((....))).)))))))))...)))..))....)))...)))))))))))))..	96	64.3	-40.6	3.50002	1.32502	0.515907	5.20499	2.45964	3.82909	1.54099	0.359169	1.30014	1.01428	1.86097	1.35553	low
112	138	ssc-miR-4332_L-1R-1	ACGGCCGCCGCCGGGCGC	18	2	-	75828886	75828954	agagcgcgcaGCGGCCGCCGCCGGGCGCcttgaacttggagccgggcgggcggccgcgctgagcgccgc	1	ssc-mir-4332,	ssc-mir-4332	cggcggggggtgtcgcgggggtgggcgggctggggccgggggtggggccggcgggggcacgacccccggtcggcgtcCACGGCCGCCGCCGGGCGCCtttccaccgc	ssc-miR-4332	CACGGCCGCCGCCGGGCGCC	5'	Diff	gp2	...((((.((((((((((((((.(((.((........)).))).))).)))))))..)))).))))...	63	82.6	-47.4	126.001	145.752	166.122	182.175	156.597	248.891	50.0822	66.0872	53.7391	33.4713	104.214	34.5661	middle
278	270	PC-3p-89192_9	AGCCTCTCTGCTCCTTCCCAGT	22	2	-	76370734	76370803	ctccttTGGGAAGGGGCACTGAGAGGTCTgggggccccaccaagAGCCTCTCTGCTCCTTCCCAGGgacc	0						3'	New	gp4	.(((.(((((((((((((..(((((((((..((......)).))).))))))))))))))))))))))..	67	65.7	-42.3	0	0	0	5.20499	0.819882	2.55272	0	0.718339	0	0	0.620322	1.35553	low
366	358	PC-3p-5692_464	TGAGATGAGAGCCCTTGGCCACT	23	2	+	76693945	76694073	gctggcagctgttggcgagagatgtaacgggcacagGGTCCAGGGCTTCCCATCCCAGCttggcctatttgtTGAGATGAGAGCCCTTGGCCACTgtgaacctcagtctcttcttcctaccctgctgat	0						3'	New	gp4	...(((((..((.((.(((((((.....((.(((((((((.(((((((..((((.((((...........)))).)))).))))))).)))).)))))..))...)))))))...)).)).)))))...	123	56.6	-52.3	26.2501	23.8504	89.7677	60.7249	37.7146	21.6982	90.148	133.611	104.011	123.743	97.3906	78.621	middle
91	83	PC-3p-233538_3	GAGCTCCCTGATTCTGCCCTCC	22	2	+	77337458	77337537	actggctaggagggcagagccaggatctgatctctcggccaggtggccaaGAGCTCCCTGATTCTGCCCTCTgagccctg	0						3'	New	gp4	...((((..(((((((((..((((....((.((((.((((....)))).)))).))))))..)))))))))..))))...	74	62.5	-47.1	0	0	0	0	0	0	0	0	0	3.04285	0	0	low
287	279	PC-5p-190229_3	CAGCATCATGGCGGACCG	18	2	+	77485908	77486010	cacagCAGCATCATGGCAGACCGctccgggcacctggcagccctgatcctcctcggagcagctgtatgtggtgagtggacccgggactggggtgccagctggg	0						5'	New	gp4	.....((((....(((((..(((.((((((((((..(((((..((.(((.....))).)))))))....))))......))))))..)))..)))))))))..	96	67	-41.8	0	2.65004	0	0	2.45964	3.82909	0	0	0	0	0	0	low
201	193	PC-3p-190574_3	AACGCCCGCCTAGGGAGGACG	21	2	+	77667004	77667095	gatctcgcgtggttttgaatgcaaggcctctctggaggcgtagtttctgctcAACGCCCGCCTAGGGAGGACGtttagaatccagcgaggca	0						3'	New	gp4	..((((((.((((((((((((.....(((((((((.((((((((....)))..)))))...))))))))).))))))))).)))))))))..	88	56.5	-40	3.50002	0	1.03181	3.46999	2.45964	3.82909	0	1.43668	1.73352	6.0857	0	0	low
331	323	PC-5p-395037_2	AGGTCTGGAGTTCTAAAGT	19	2	-	77805689	77805805	gttgggagccgaggtcggAGGTCTGGAGTTCTAAAGTcttccatgggaccgggcgagtgcagtgctcctgggcgggggccgggctcggggactctggtgcccctgcctgggctcctc	0						5'	New	gp4	...(((((((.(((..((.((((..(((((((..((((((((......(((((..(((.....))))))))....)))..)))))..)))))))..).)))))..))).))))))).	113	69.2	-58.9	0	0	0	3.46999	0	0	0	2.87336	0	0	0	0	low
449	441	PC-5p-1247251_1	TCTCGACTGGCTGTGGCTCC	20	2	+	79772624	79772748	nnnctgtgcacacctgtctcagcaattgttttagatcttttcTCTGGACTGGCTGTGGCTCCattgagatctgccagcttgaagccacctcagagttcaggtctctgagactggtctcacagagg	0						5'	New	gp4	...(((((...(((.(((((((..........((((((...((((((..(((((..((((.((........))..))))...)))))..))))))...))))))))))))).)))..)))))...	119	49.6	-45.1	0	0	0	3.46999	0	0	0.770496	0	0.86676	0	0	0	low
477	469	PC-3p-66297_15	GCCCCGGGCGGGTCGCGC	18	2	-	80750327	80750389	cccctgcgcgaccaacccggccccgaagttggccaacttgGCCCCGGGCGGGGCGCGCggagt	0						3'	New	gp4	...(((((((.((..(((((..((.(((((....)))))))..)))))..)).)))))))...	57	77.8	-34.8	0	2.65004	1.03181	0	3.27953	5.10545	0	0	1.73352	1.01428	1.24064	0	low
196	188	PC-5p-30288_47	TCCCCTTTCTAAAAGCACTCAGA	23	2	+	83796913	83796979	tTCCCCTTTCTAAAAGCACTCAGAggggctttcaataatgacccactgagctgtcaagaaagggcag	0						5'	New	gp4	...((((((((....((((((((.(((..............))).))))).)))..))))))))...	61	47.8	-24.7	14.0001	25.1754	14.4454	13.88	22.9567	19.1454	10.7869	10.7751	17.3352	7.09998	17.9893	26.4329	middle
428	420	PC-3p-209203_3	GAAGAAGATGGAGGCTTTT	19	2	-	89301685	89301745	tttgtgctaaatatctttaaactttccaatccgGAAGAAGATTGAGGCTTTTtggcattgt	0						3'	New	gp4	...((((((((...((((((.((((((.....)))..))).))))))...))))))))...	55	34.4	-15.4	0	3.97506	0	0	0	0	0	0	0	0	0	0	low
1	1	ssc-miR-9-2_R-1	TCTTTGGTTATCTAGCTGTATG	22	2	-	98744595	98744705	agaggctgtgagggaagcgagttgttaTCTTTGGTTATCTAGCTGTATGagtgtattggtcttcATAAAGCTAGATAACCGAAAGTaaaaactccttcaagatcgcccgga	21	ssc-mir-9-3,ssc-mir-9-2,ssc-mir-9-1,bta-mir-9-1,eca-mir-9a-2,eca-mir-9a,cfa-mir-9-3,cfa-mir-9-2,cfa-mir-9-1,hsa-mir-9-3,ptr-mir-9-1,ppy-mir-9-2,mml-mir-9-3,cgr-mir-9,mmu-mir-9-2,rno-mir-9a-3,mdo-mir-9a-1,mdo-mir-9a-3,sha-mir-9,oan-mir-9-1,oan-mir-9-2,	ssc-mir-9-1	cggggttggttgttaTCTTTGGTTATCTAGCTGTATGAgtggtgtggagtcttcataaagctagataaccgaaagtaaaaataacccca	ssc-miR-9-2	TCTTTGGTTATCTAGCTGTATGA	5'	Diff	gp2	...((..((((..((((.(((((.(((..(((((((((((((((.((((((..(....)..)))))).)))))))))))))))..))).)))))))))....))))))...	105	42.3	-45.4	190.751	245.129	71.711	60.7249	118.883	138.485	93.23	195.029	100.978	82.6641	137.712	87.432	middle
1	2	bta-miR-9-3p_R+5	ATAAAGCTAGATAACCGAAAGT	22	2	-	98744595	98744705	agaggctgtgagggaagcgagttgttaTCTTTGGTTATCTAGCTGTATGagtgtattggtcttcATAAAGCTAGATAACCGAAAGTaaaaactccttcaagatcgcccgga	21	ssc-mir-9-3,ssc-mir-9-2,ssc-mir-9-1,bta-mir-9-1,eca-mir-9a-2,eca-mir-9a,cfa-mir-9-3,cfa-mir-9-2,cfa-mir-9-1,hsa-mir-9-3,ptr-mir-9-1,ppy-mir-9-2,mml-mir-9-3,cgr-mir-9,mmu-mir-9-2,rno-mir-9a-3,mdo-mir-9a-1,mdo-mir-9a-3,sha-mir-9,oan-mir-9-1,oan-mir-9-2,	bta-mir-9-1	ggaggcccgtttctcTCTTTGGTTATCTAGCTGTATGagtgccacagagccgtcATAAAGCTAGATAACCGaaagtagaaatgactctca	bta-miR-9-3p	ATAAAGCTAGATAACCG	3'	Diff	gp2	...((..((((..((((.(((((.(((..(((((((((((((((.((((((..(....)..)))))).)))))))))))))))..))).)))))))))....))))))...	105	42.3	-45.4	16.6251	16.5628	4.64316	4.33749	12.7082	15.9545	10.4017	11.4934	5.63394	7.60712	14.5776	22.0274	middle
305	297	PC-5p-145038_5	GAATCTGAGTCACGGCACCA	20	2	-	101463065	101463166	tcacttacttgGAATCTGAGTCACGGGACCAgttgccaaagggagtaccccaatttgtctaatggcatagatggtacccatttcttagttaaaagtaagccc	0						5'	New	gp4	...(((((((..((.(((((....(((((((..(((((..(((..............)))..)))))....)))).)))....)))))))..)))))))...	96	44.1	-31.6	0	0	0	0	0	0	4.62298	0	0	0	0	0	low
177	169	PC-3p-1287648_1	TCTGTTTAGTTGAATCTT	18	2	-	118638903	118639078	ttatcattagctgacaggtatacaagcatagttccgagatgcttcataagaataaaatgtaacagagttaaaactaggatTCTGTTTAGTTGAATCTTagctgcatccagggaacttaccccatgttctgtaaatagttgcctctcaggataaataggtgtgtaagacatggtcac	0						3'	New	gp4	(((((.....((((.((((((((((((((((((((..(((((....(((((....(((..(((((((((........)))))))))..)))...)))))...)))))...))))))......))))).))))......))))).)))))))))....((((.....))))......	153	37.5	-42.4	3.50002	0	0	0	0	0	0	0	0	0	0	0	low
195	187	PC-3p-114093_6	TGAACAATGAATGCAATTT	19	2	-	122129634	122129708	ggagagaagggttttgtattttatattactatatgcctctggtatTGAATAATGAATGCAATTTtctagctttcc	0						3'	New	gp4	((((((..(((..((((((((..((((.....(((((...)))))..))))..))))))))...)))..))))))	75	32	-19.4	0	0	0	0	2.45964	3.82909	0.770496	0	0	0	0.620322	0	low
392	384	PC-3p-286050_2	CCATGTCCAGGTTGAAGGTG	20	2	+	123526542	123526610	ttatccacctgtgaaccacatatgactgtttgcccagctctcatCCATGGCCAGGTTGAAGGTGgagac	0						3'	New	gp4	...(((((((...((((...((((..((...((...))...))..))))....))))..)))))))...	63	50.7	-19.1	0	0	0	6.93999	0	0	0.770496	0	0	0	0	0	low
295	287	PC-5p-305979_2	ACACTGATGCTGGAGAAGGGA	21	2	+	124780354	124780447	taACACTGATGCTGGAGAAGGGGgcttgtatctatgaacagaaaacttcctggtattggagctgaaattaacccctttcccaacagcagtggca	0						5'	New	gp4	...(((((.((.(((.((((((((.(((..((((....(((........)))....))))........)))))))))))))).)).)))))...	88	45.7	-30.4	3.50002	0	0	0	0	0	0	0	0	0	0	0	low
426	418	PC-3p-61500_17	GAAGGCTTCTGCTCTCACCCT	21	2	-	140215389	140215457	gcagggagagggcagaagctacacccagaacacaccaaggacctgGAAGGCTTCTGCTCTCACCCTagc	0						3'	New	gp4	((((((.(((((((((((((....((((..............))))..))))))))))))).)))).))	69	59.4	-35	1.75001	0	2.06363	1.735	0.819882	0	7.70496	0.718339	2.60028	3.04285	3.10161	1.35553	low
2	3	PC-5p-229904_3	TGTTGAGACAATTGAGAGATGA	22	2	-	147020908	147020995	taccttgtagggcTGTTGAGACAATTGAGAGATGAttgctaaattcattatttacaTCTCTTAATTGTCTCAACAGCCctacaagaat	0						5'	New	gp4	...(((((((((((((((((((((((((((((((.....(((((.....))))))))))))))))))))))))))))))))))))...	82	35.2	-55.1	0	1.32502	5.67497	1.735	0.409941	0	0.385248	0	0.43338	0	0	0	low
1	1	PC-5p-41468_30	TGTTGAGACAATTAAGAGATGT	22	2	+	147020955	147021040	ttcttgtagggcTGTTGAGACAATTAAGAGATGTaaataatgaatttagcaatcaTCTCTCAATTGTCTCAACAGCCctacaaggt	0						5'	New	gp4	.((((((((((((((((((((((((.(((((((....(((.....))).....))))))).)))))))))))))))))))))))).	84	36	-52.4	5.25002	7.95013	1.54772	0	0.409941	2.55272	3.46723	1.43668	2.1669	1.01428	3.72193	3.38884	low
1	2	PC-3p-66016_15	TCTCTCAATTGTCTCAACAGCC	22	2	+	147020955	147021040	ttcttgtagggcTGTTGAGACAATTAAGAGATGTaaataatgaatttagcaatcaTCTCTCAATTGTCTCAACAGCCctacaaggt	0						3'	New	gp4	.((((((((((((((((((((((((.(((((((....(((.....))).....))))))).)))))))))))))))))))))))).	84	36	-52.4	4.37502	5.30008	4.12725	0	4.91929	4.46727	1.92624	6.10588	2.60028	3.04285	1.55081	2.37218	low
213	205	PC-3p-212665_3	ATGCGCGAGGAGAAGGGC	18	2	-	147028478	147028642	acggggtctgaggtccggctaaaatcgcgcgcgcatgtgtgggcgggggacggggccgtcttagggggcgctacgaaacgATGCGCGAGGAGAAGGGCcaaagccgcgacaccgagaaagaaacgctgctcaaacggataagcttttccgagtctgcgaaaccct	0						3'	New	gp4	..(((((....(((((..((....(((((((((....(((((((...(((((....)))))......)).)))))...)).)))))))..))..))))).....((((((..((..((((.....(((......))).....))))..)).))).)))..)))))	88	61.8	-59.1	0	1.32502	5.15907	0	0.819882	0	1.54099	0	0	0	0	0.677767	low
471	463	PC-3p-434302_2	AGTAGGGCACATGGCAGAGCT	21	2	-	148053755	148053812	gtttctgcctcatgccctgctctggatgggagaagccAGTAGGGCACATGGCAGAGCA	0						3'	New	gp4	(.(((((((...(((((((((..((..........)))))))))))...)))))))).	57	58.6	-26.9	0	0	0	3.46999	0	0	0	0	0	0	0	0	low
105	97	PC-3p-55904_19	TGCTCTGCAGTGCCCCACCTTG	22	2	+	149836662	149836736	cttgcagcaaggtggggtgctccagaggcgctgcctccttcctgggTGCTCTGCAGTGCCCCACCTTGctgcttg	0						3'	New	gp4	...((((((((((((((..((.(((((.(((..((........)))))))))).))..))))))))))))))...	69	65.3	-49.8	0	1.32502	6.19088	0	0	5.10545	8.47546	2.87336	8.6676	7.09998	4.34225	10.8443	middle
44	37	PC-5p-2049_2014	AGACGGATGACCTTGCTGTTT	21	2	-	151102683	151102792	atagctccaagaagaaaggggaaaaaaAGACGGATGACCTTGCTGTTTacatttagaaaggaTAAGCAGCAAGGTTGTCTGTCTttttttcctctctgttcttcagccca	0						5'	New	gp4	...(((....((((((((((((((((((((((((..(((((((((((((..(((...)))..)))))))))))))..))))))))))))))))))...)))))))))...	104	40.9	-56.3	264.251	323.305	177.472	175.235	273.84	307.603	233.46	262.912	305.1	234.299	263.637	243.318	middle
44	38	PC-3p-1771_2544	TAAGCAGCAAGGTTGTCTGTCT	22	2	-	151102683	151102792	atagctccaagaagaaaggggaaaaaaAGACGGATGACCTTGCTGTTTacatttagaaaggaTAAGCAGCAAGGTTGTCTGTCTttttttcctctctgttcttcagccca	0						3'	New	gp4	...(((....((((((((((((((((((((((((..(((((((((((((..(((...)))..)))))))))))))..))))))))))))))))))...)))))))))...	104	40.9	-56.3	400.752	441.232	258.985	360.879	410.761	505.439	315.133	457.582	345.837	232.271	534.718	332.106	middle
363	355	PC-3p-16524_109	CTCTGCCACACCACCCGCCTGC	22	3	+	2177103	2177177	gtgggcaggcgggtgctgggaggaggcagaggggcttctggggtctgctCTCTGCCACACCACCCGCCTGCctgg	0						3'	New	gp4	..(((((((((((((.((((..(((((((((((...)))....))))).)))..)).)).)))))))))))))..	71	72	-46.7	7.00003	9.27515	14.4454	13.88	10.6585	6.38181	12.3279	10.0567	13.0014	19.2714	12.4064	11.522	middle
23	22	PC-3p-139500_5	TCGCGCCCACCGCCTCACC	19	3	-	7607948	7608013	gcaggtgagctggggggagggctggccgccagtcagccgccggcTCGCGCCCACCTCCTCACCacc	0						3'	New	gp4	...((((((..(((((..((((((((.((......)).))))))))...))).))..))))))...	60	77.3	-37.5	0.875004	0	0.515907	3.46999	0	0	0	0	0.86676	0.507142	0	0.338884	low
299	291	PC-5p-198895_3	TCCAGTGACTGTTTGGTC	18	3	+	8153199	8153303	cctggccTCCAGTGACTGTTTGGTCtcttccctccccacttctttcccaggtttcggtctaagtaccacccagatgaggtgggcaagcgtcggcaggaggcccgg	0						5'	New	gp4	((.(((((((.(((((.(((((............((((((((..((...(((...(((......))))))..)).))))))))))))))))).).))))))).))	105	61	-39.9	1.75001	3.97506	1.03181	0	0	1.27636	1.54099	0	0	0	0.620322	0.677767	low
394	386	PC-5p-483965_2	CTGGATGCCCCAAGGGTCA	19	3	+	12099962	12100041	gaagagagaagttgtcCTGGTTGCCCCAAGGGTCAggaactttctgtcccctgtccagcttggatggcatgcatctcata	0						5'	New	gp4	...((((...((..(((..((((...((.(((.(((((...))))).))).))..))))..)))..)).....))))...	74	52.5	-28.9	0	0	0	3.46999	0	0	0	0	0	0	0	0	low
230	222	PC-3p-85307_10	TTCAGAGAACTGTAAACGCCT	21	3	-	16644693	16644788	atagaataagcagaaggcatttccagtcctctgggtgtggaagagtaacggtacctacaTTCAGAGAACTGTAAACGCCTgtctgtttcattcatt	0						3'	New	gp4	...(((((((((((((((.(((.((((.(((((..(((((..............)))))..))))).)))).))).)))).))))))).))))...	90	42.7	-38.8	3.50002	3.97506	3.09544	1.735	0.819882	0	1.54099	0	1.73352	1.01428	0	1.35553	low
310	302	PC-5p-416184_2	TTTGCTGGCCTGGCCCTCGCCC	22	3	+	18825832	18825903	TTTGCTGGCCTGGCCCTCGCCCtgcagcagctctgctcttgagggctgtgcagcgagcagctaggccaggtc	0						5'	New	gp4	....((((((((((.(((((..((((.(((((((.......))))))))))))))))..))))))))))...	65	66.7	-43.1	0	0	1.03181	0	0	5.10545	0	0.718339	0	0	0	0	low
217	209	PC-3p-172399_4	ACACAGTGATCCAACTGGAT	20	3	-	23230312	23230372	gggccggattgggttcactgactccaggcctcacccctggACACAGTGATCCAACTGGAAa	0						3'	New	gp4	...((((.(((((.((((((..((((((.......))))))..)))))))))))))))...	55	59	-28.4	0	0	0	3.46999	0.819882	0	0.770496	0	0	0	0	0	low
81	104	ssc-miR-365-3p	TAATGCCCCTAAAAATCCTTAT	22	3	-	29976179	29976282	gttggttaccgcagggaaaatgAGGGACTTTTGGGGGCAGATGTGTttccattccactatcaTAATGCCCCTAAAAATCCTTATtgctcttgcagtattcctcg	18	ssc-mir-365-1,ssc-mir-365-2,bta-mir-365-2,bta-mir-365-1,eca-mir-365-2,eca-mir-365-1,cfa-mir-365-2,ptr-mir-365-2,ptr-mir-365-1,ggo-mir-365a,mml-mir-365-2,cgr-mir-365,mmu-mir-365-2,mmu-mir-365-1,rno-mir-365,mdo-mir-365,oan-mir-365-1,oan-mir-365-2,	ssc-mir-365-2	aaaaatGAGGGACTTTCAGGGGCAGCTGTgttttctgactcagtcaTAATGCCCCTAAAAATCCTTATtgttcttgcagt	ssc-miR-365-3p	TAATGCCCCTAAAAATCCTTAT	3'	Yes	gp2	...((.(((.((((((..((((((((..(((((((((((..((((...............)))).))))))))))).))))))))..)))))).)))..))...	98	45.2	-39	57.7503	68.2386	53.1384	72.0024	79.1186	79.1345	100.935	103.441	105.745	105.485	147.637	225.019	middle
147	139	PC-5p-930651_1	CAGATCTCGGTGGAACCTC	19	3	-	32835828	32835943	cccgggaaggctgcactctCAGATCTCGGGGGAACCTCgtgactcaagccaagacagaaaatacctctggcgtcccacgcagcccctcctcagtctgtaaccagcaccttccccgc	0						5'	New	gp4	...(((((((.(((.....(((((...(((((...((((((......((((.((...........))))))....)))).))..)))))...)))))......))))))))))...	110	61.2	-39.2	0	0	0	3.46999	0	0	0	0	0	0	0	0	low
472	464	PC-5p-156065_4	TGCCTCCCTTGAGCAGCGGACT	22	3	+	38654289	38654381	gggccctggtcTGCCTCCCTTGAGCAGCGGACTgcctgctggtgtccccagctcccagcctcagttcctgccttgggaggccaaccagggggt	0						5'	New	gp4	...(((((((..(((((((....((((.((((((...(((((.((.....))..)))))..))))))))))...)))))))..)))))))...	87	68.8	-52.2	0	0	3.09544	0	0	0	0	2.15502	0	0	0.620322	0	low
454	446	PC-5p-135573_5	ATTCTAACTGCATTTAGACTCT	22	3	-	38805392	38805456	aaaATTCTAACTGCATTTAGACTCTgaggtgaccaagtcagagtctaattgcagttagcagtgac	0						5'	New	gp4	...((((((((((((.(((((((((((((...))...))))))))))).))))))))).)))...	59	40	-30.1	0	0	3.09544	0	0	1.27636	0.770496	0.718339	0	1.01428	0.620322	0	low
348	340	PC-3p-111832_7	ACCCCCACCCTCCACCCCCAGT	22	3	+	39035267	39035337	cagctgggggtggggggtggacagtggctcctgagggacccagcatcACCCCCACCCTCCACCCCCAGGcc	0						3'	New	gp4	...(((((((((((((((((...((((((((....)))....))..)))..)))))))))))))))))...	65	73.2	-44.6	0	0	1.03181	3.46999	0.819882	1.27636	1.54099	0.718339	0	0	0.620322	0	low
252	244	PC-5p-93775_9	CCTGCCAGGGAGAGGGGACAGC	22	3	-	40874922	40874989	gaggccCCTGCCAGGGAGAGGGGACAGCtggcttcccttTGCTGAGTCCCTCCCCTGGCAGGggcacc	0						5'	New	gp4	...(((((((((((((.((((((.((((.((....))...))))..)))))))))))))))))))...	62	70.6	-49.7	0	0	1.03181	1.735	0	0	0.770496	2.15502	3.46704	2.02857	0	1.35553	low
130	122	PC-5p-76176_12	TCCCCGGCACCTCCACTGT	19	3	-	41671058	41671166	tcccctctgaaTCCCCGTCACCTCCACTGTcctgggggctgctctgagcaaggtctgcttcaccacggcctgggggaaagtgggtggcactggggctgggcagaggtcg	0						5'	New	gp4	...((((((...((((((((((..((((.((((..((((((...((((((.....))).)))...))))))..)))).))))))))))...)))).....))))))...	103	66.1	-50.1	3.50002	1.32502	2.06363	5.20499	0.819882	1.27636	0	0	0	0	0	2.0333	low
71	63	PC-5p-17771_99	CCTCCACCCGCCCTCCGTC	19	3	-	42110879	42110960	catccggctttcaCCTCCACCCGCCCTCCCTCccgggcccacctccacccttcccgagagcagggcctggaggcgctggctg	0						5'	New	gp4	((.(((((.....((((((...(((((..(((.((((...............)))).))).))))).)))))).))))).))	82	73.2	-32.6	50.7502	46.3757	14.4454	62.4599	12.2982	51.0545	16.9509	7.90173	6.93408	10.1428	15.5081	12.1998	middle
72	64	PC-5p-34337_40	AGTGCGCCCCGGGCGGGT	18	3	+	42726252	42726308	cgAGTCCGCCCCGGGCGGGTaggagcccagcgccaactccgtctcgggcgcgacctg	0						5'	New	gp4	...((((((((..(((((((.((.((...)).)).)).)))))..))))).)))...	51	77.2	-29.1	8.75004	6.6251	7.22269	8.67499	1.63976	7.65817	0.770496	2.15502	1.73352	0	1.24064	2.0333	low
125	153	ssc-let-7f_R+1	TGAGGTAGTAGATTGTATAGTTG	23	3	+	44864801	44864893	ctatcagagTGAGGTAGTAGATTGTATAGTTGtggggtagtgattttaccctgttcaggagataaCTATACAATCTATTGCCTTCCCtgagga	51	ssc-let-7f-2,ssc-let-7a-2,ssc-let-7e,ssc-let-7a-1,bta-let-7f-1,bta-let-7a-3,bta-let-7a-1,bta-let-7e,bta-let-7a-2,bta-let-7b,oar-let-7a,oar-let-7b,eca-let-7f,eca-let-7a-2,eca-let-7e,cfa-let-7f,cfa-let-7e,cfa-let-7a-2,cfa-let-7a-1,cfa-let-7b,hsa-let-7b,ptr-let-7f-1,ptr-let-7a-3,ptr-let-7a-1,ptr-let-7e,ptr-let-7a-2,ptr-let-7b,ppy-let-7b,ggo-let-7f,ggo-let-7a,ggo-let-7e,ggo-let-7b,mml-let-7a-2,cgr-le…	ssc-let-7f-2	tctatcagagTGAGGTAGTAGATTGTATAGTTgtggggtagtgattttaccctgttcaggagataactatacaatctattgccttccctgaggagta	ssc-let-7f	TGAGGTAGTAGATTGTATAGTT	5'	Diff	gp2	...((((...((((((((((((((((((((((((((((((.....))))))).........)))))))))))))))))))))))..))))...	87	40.9	-42	568.753	410.757	524.161	364.349	386.574	366.954	435.33	610.947	483.652	519.313	457.177	413.438	middle
125	154	mmu-let-7f-1-3p_1ss22CT	CTATACAATCTATTGCCTTCCT	22	3	+	44864801	44864893	ctatcagagTGAGGTAGTAGATTGTATAGTTGtggggtagtgattttaccctgttcaggagataaCTATACAATCTATTGCCTTCCCtgagga	51	ssc-let-7f-2,ssc-let-7a-2,ssc-let-7e,ssc-let-7a-1,bta-let-7f-1,bta-let-7a-3,bta-let-7a-1,bta-let-7e,bta-let-7a-2,bta-let-7b,oar-let-7a,oar-let-7b,eca-let-7f,eca-let-7a-2,eca-let-7e,cfa-let-7f,cfa-let-7e,cfa-let-7a-2,cfa-let-7a-1,cfa-let-7b,hsa-let-7b,ptr-let-7f-1,ptr-let-7a-3,ptr-let-7a-1,ptr-let-7e,ptr-let-7a-2,ptr-let-7b,ppy-let-7b,ggo-let-7f,ggo-let-7a,ggo-let-7e,ggo-let-7b,mml-let-7a-2,cgr-le…	mmu-let-7f-1	atcagagTGAGGTAGTAGATTGTATAGTTgtggggtagtgattttaccctgtttaggagataaCTATACAATCTATTGCCTTCCCtgag	mmu-let-7f-1-3p	CTATACAATCTATTGCCTTCCC	3'	Diff	gp2	...((((...((((((((((((((((((((((((((((((.....))))))).........)))))))))))))))))))))))..))))...	87	40.9	-42	260.751	263.679	151.677	185.645	218.089	238.68	167.968	158.035	185.487	175.471	187.958	310.417	middle
210	202	PC-5p-103516_8	ACACTCAGCATGCACATGGAGG	22	3	-	55091547	55091624	catgtccACACTCAGCATGCACATGGAGGctttgagttttcctagaaaccagcctcgtgcacactgagtaagggcacg	0						5'	New	gp4	..(((((..((((((..(((((...((((((..(.(((((....)))))))))))))))))..))))))..)))))..	74	52.6	-32.8	0	0	0	1.735	1.63976	1.27636	1.54099	0	7.80084	0	0	4.0666	low
468	460	PC-3p-297646_2	AACAGCATGTTTGGAGAGATTG	22	3	+	58217103	58217179	nnnggcattccccacagtgctgtcctcaaggacaagtgtggttataagggAACAGCATGTTTGGAGAGATTGctcta	0						3'	New	gp4	...(((((((.(((..((((((((((....(((.......)))....))).)))))))...))).)))..))))...	71	46.8	-22.6	0	3.97506	0	0	0	0	0.770496	0	0	0	1.24064	0	low
291	283	PC-5p-116058_6	TGCCTGGGCTGTGCTTGGGTCC	22	3	+	59035774	59035843	ctgtgggcTGCCTGGGCTGTGCTTGGGTCCcagcagtagtagccttgggtccggccacagtgcaggccct	0						5'	New	gp4	....(((((((((((((((..((..((.....((.......))))..))..))))).))).)))).))).	65	67.1	-32.4	0	0	1.03181	1.735	0.819882	6.38181	1.54099	1.43668	1.73352	0	1.24064	1.35553	low
404	396	PC-3p-67497_15	CCTGTGCTTCCTCACCTGCAGT	22	3	+	59037862	59037929	cacctgccggtgtggggggcacggccagatccaagacaaacgtgCCTGTGCTTCCTCACCTGCAGAag	0						3'	New	gp4	...((((.((((.(((..(((((((..................))).))))..))))))).))))...	62	63.2	-30.2	1.75001	0	1.03181	1.735	3.27953	1.27636	0.770496	0.718339	1.73352	2.02857	3.10161	2.71107	low
173	165	PC-5p-71057_13	AAGGCCTTTGTCTCTGAAGTGC	22	3	-	59261921	59261981	ccAAGGCCTTTGTCTCTGAAGTGCtggtttccctggtccttcaggggccccatggcctccc	0						5'	New	gp4	...(((((...((((((((((..(..(.....)..)..)))))))))).....)))))...	55	62.3	-28.4	0	0	1.03181	0	0	0	2.31149	0.718339	4.3338	2.02857	0.620322	0.677767	low
483	475	PC-5p-11687_175	CCTGAGGATCTGAGGGGA	18	3	-	88284346	88284402	caagtcCCTGAGGATCTGAGGGGAggtccaatgccgtcccttagatgccggggccaa	0						5'	New	gp4	...(((((...(((((((((((..(((.....)))..))))))))).)))))))...	51	61.4	-28.4	14.0001	10.6002	14.4454	10.41	12.2982	24.2509	18.4919	17.2401	19.9355	18.2571	8.06419	3.38884	middle
68	88	ssc-miR-216_R-2	TAATCTCAGCTGGCAACTGTG	21	3	+	90058971	90059075	cctggatggctgtgagttggctTAATCTCAGCTGGCAACTGTGagatgttcatacaatcccccacagtggtctctgggattatgctaaacagagcaatttccttg	13	ssc-mir-216-1,ssc-mir-216-2,bta-mir-216a,eca-mir-216a,cfa-mir-216a,hsa-mir-216a,ppy-mir-216a,mml-mir-216a,mmu-mir-216a,rno-mir-216a,mdo-mir-216,sha-mir-216a,oan-mir-216a,	ssc-mir-216-2	tgagttggctTAATCTCAGCTGGCAACTGTGAGatgttcatacaatcccccacagtggtctctgggattatgctaaacagag	ssc-miR-216	TAATCTCAGCTGGCAACTGTGAG	5'	Diff	gp2	...(((..(((.((..(((((.(((((((((..(((.((((((.(((((....)).)))...)))))).))).))))))))).))))).)).)))....)))...	99	47.6	-39	0	0	0	0	1.63976	0	0.770496	0	0	3.04285	0	0	low
161	153	PC-3p-185058_3	CAATCGGAAGTGGTTCCA	18	3	-	92688172	92688248	gagttgcaccactttctgtgcatataaaattagttggactagtagaacttatattaCAATCGGAAGTGGTTCAAgag	0						3'	New	gp4	...(((.(((((((((((((.((((((.(((((.....))))).....))))))))))...))))))))).)))...	71	36.4	-18.9	0	0	0	0	0	0	3.08198	0	0	0	0	0	low
281	273	PC-5p-242971_3	TTAATCTCTTGTTGTCTGAT	20	3	+	104117154	104117220	gatcaatTTAATCTCTTTTTGTCTGATaagtaagacttgagtgggcatttggggttttgagttgcaa	0						5'	New	gp4	...((((((((.((((...(((((..((((.....))))...)))))...))))..))))))))...	61	35.8	-15.2	0	0	0	8.67499	0	0	0	0	0	0	0	0	low
55	50	PC-3p-42443_29	GCACCTTTATTCTTCTAACTG	21	3	+	106224401	106224485	atacctttgctggtcAGTTAGAAGAATAAAGATGCTatgtgatcaacttaGCACCTTTATTCTTCTAACTGaccagcaaagggtg	0						3'	New	gp4	...((((((((((((((((((((((((((((.(((((.((.....)).))))).))))))))))))))))))))))))))))...	79	38.8	-56.8	4.37502	6.6251	3.61135	3.46999	2.0497	1.91454	0	2.15502	0.43338	0	1.55081	0.677767	low
425	417	PC-5p-337639_2	CTCTCGTTCGTTTTCCTGTA	20	3	-	125748180	125748262	ctgccaccgcagtctgcctgCTTTCGTTCGTTTTCCTGTAcctttgctgaggcctagagcgacccgggaggaagctaggccgg	0						5'	New	gp4	((((....)))).(.((((((((((..(((..(..((.((((((....))))..)).))..)..)))..)))))).)))).).	69	61.4	-24.9	1.75001	5.30008	2.06363	0	1.63976	3.82909	3.08198	1.07751	2.60028	6.0857	2.48129	2.37218	low
98	90	PC-3p-50933_22	CTGGCTCAGCGTGTGCCT	18	3	+	130888499	130888626	cgacatggccatctaagcgcatctctacaaagacaagcgcaggcctgggggctgctctgaagagcatccacacttgctgcCGGGCTCAGCGTGTGCCTcccgtcgagatgcagagggcttttgtcaga	0						3'	New	gp4	.((((.((((.(((....(((((((.((..((.((..(((.(((((((..(((((((....))))).........))..)))))))..)))..)).))...)).)))))))))).))))..))))...	124	59.4	-53.1	3.50002	7.95013	2.06363	6.93999	3.27953	10.2109	6.93447	0	3.46704	1.01428	3.10161	0	middle
166	158	PC-3p-107895_7	CCCGGGGCTGCAGAAAGAC	19	3	-	134114929	134115053	ggacaccaggattcacaaggttaatccgtggccccggtgtaatcaagtgatctctgccccagaaatcagaagtcactaccCCCGGGGCTGCAGAAAGAAcggtgagtcagtggtctgtttccttt	0						3'	New	gp4	(((.((((.(((((((...(((..((.(..(((((((.((.....(((((..((((..........))))..)))))))..)))))))..).))...))).)))))))..)))).....)))...	122	52.8	-46	1.75001	3.97506	2.06363	1.735	0	2.55272	0	2.15502	1.73352	3.04285	0	0.677767	low
98	124	oan-miR-1329-5p_L-1R+2_1ss2AC	CCAGTGATCAGGTTACGATGGAT	23	3	+	134560386	134560470	ctggttgtagggatCCAGTGATCAGGTTACGATGGATttctcaagtggcaacctcgtagcttgctcaccaaatccctataacacg	1	oan-mir-1329,	oan-mir-1329	gaggaatctcaatctggttgtaggggTACAGTGATCAGGTTACGATGGatttctcaagtaacaaCCTCGTAGCTCGGTCACGATAtccatatgactcgaagagcaacaattttggtcccgttcctc	oan-miR-1329-5p	TACAGTGATCAGGTTACGATGG	5'	Diff	gp2	...(((((((((((...((((.((((((((((.((...((......))...)))))))))))).))))...)))))))))))...	79	48.2	-36.8	31.5001	41.0757	0	0	17.2175	16.5927	33.9018	12.2118	0.86676	16.2285	16.7487	0.677767	middle
176	168	PC-5p-284802_2	TTTAGGCAACAGAGCTGTTC	20	3	+	137688862	137688960	TTTAGGCAACAGAGCTGTTCccaggactggagtcagggcctaggctgggagaggcggtcgagcttagggctgaggtcggggagcggctgtggggtcagc	0						5'	New	gp4	....(((..((.((((((((((..((((....(((.(.((((((((.((........)).)))))))).)))))))).)))))))))).))..)))...	92	64.6	-51.4	0	0	1.03181	0	0	0	0	0	0.86676	5.07142	0	0	low
94	86	PC-5p-118649_6	CCGGCCGTGCCGGCGGCCC	19	3	-	141628291	141628364	ccacagccgtCCGTCCGTGCCGGCGGCCCctgctccatccatgcagggctcgccctgctgggatccggctgcag	0						5'	New	gp4	...((((((...((((..((.((((..((((((.........))))))..))))..))..)))).))))))...	68	74.3	-37.5	0	0	1.03181	6.93999	1.63976	1.27636	2.31149	1.43668	0	1.01428	0.620322	0	low
264	256	PC-5p-490277_2	CTGGGCTGACACGCTGTGCC	20	4	+	606346	606452	ggaacgggggtggggttccaggCTGGGCTGACACGCTGTGCCccggctctctgtcttgcaggtcttgagcaatgcacggctgtttctagagaacctcatcaagtgag	0						5'	New	gp4	...((...((((((((((....(((((..((((.(((((((....((((((((.....))))....))))...)))))))))))))))).))))))))))..))...	101	59.8	-42.7	3.50002	0	0	0	0	0	0	0	0	0	0	0	low
19	26	hsa-miR-30d-3p_L-1R+1	TTTCAGTCAGATGTTTGCTGCT	22	4	+	6713500	6713611	atttgttgtctagaaagtctgttgtTGTAAACATCCCCGACTGGAAGCTgtaagacatagctaagcTTTCAGTCAGATGTTTGCTGCCaccgactcttcacaggcatcattt	19	ssc-mir-30d,ssc-mir-30a,bta-mir-30d,bta-mir-30a,eca-mir-30d,cfa-mir-30d,cfa-mir-30a,hsa-mir-30d,hsa-mir-30a,mml-mir-30d,mml-mir-30a,cgr-mir-30d,cgr-mir-30a,mmu-mir-30d,mmu-mir-30a,rno-mir-30a,mdo-mir-30a,oan-mir-30d,oan-mir-30a,	hsa-mir-30d	gttgtTGTAAACATCCCCGACTGGAAGctgtaagacacagctaagCTTTCAGTCAGATGTTTGCTGCtac	hsa-miR-30d-3p	CTTTCAGTCAGATGTTTGCTGC	3'	Diff	gp2	...((.(((((.(((((((.((.(..(((((((((...(((((((((((..............))))))))))).)))))))))..).)).)))).)))..))))).))...	106	42.9	-40.4	434.877	614.81	618.056	445.027	616.141	456.3	805.554	834.71	847.692	1238.95	870.932	588.641	middle
20	27	ssc-miR-30b-3p_R+1	CTGGGAGGTGGATGTTTACTTC	22	4	+	6717634	6717726	aaaccgagttttcagttcgTGTAAACATCCTACACTCAGCTgtaatacatggattggCTGGGAGGTGGATGTTTACTTCagctgacttggaat	34	ssc-mir-30b,ssc-mir-30c-1,ssc-mir-30c-2,bta-mir-30b,bta-mir-30c,bta-mir-30f,oar-mir-30b,eca-mir-30b,eca-mir-30c,eca-mir-30c-2,cfa-mir-30b,cfa-mir-30c-1,cfa-mir-30c-2,hsa-mir-30b,hsa-mir-30c-2,ptr-mir-30c-1,ggo-mir-30b,ggo-mir-30c,mml-mir-30c-2,age-mir-30b,cgr-mir-30b,cgr-mir-30c,mmu-mir-30b,mmu-mir-30c-2,mmu-mir-30c-1,rno-mir-30b,rno-mir-30c-2,mdo-mir-30b,mdo-mir-30c-1,mdo-mir-30c-2,sha-mir-30c,o…	ssc-mir-30b	tttcagttcgTGTAAACATCCTACACTCAGCTgtaatacatggattggCTGGGAGGTGGATGTTTACTTcagctga	ssc-miR-30b-3p	CTGGGAGGTGGATGTTTACTT	3'	Diff	gp2	...(((((...((((((...((((((((((.((.(((((((..............)))))))..))))))))))))...)))))))))))...	87	43	-36.1	29.7501	30.4755	33.5339	18.2175	32.7953	24.2509	40.8363	35.5578	39.4376	42.0927	39.0803	35.5828	middle
182	174	PC-5p-479002_2	CAAAGGAATCCTCCAGGCAGAGC	23	4	-	12487221	12487282	ttCAAAGGAATCCTCCAGGCAGAGCgtcctctttaagagacgcccagggggattcctttatg	0						5'	New	gp4	...(((((((((((((.((....(((((.((.....))))))))).)))))))))))))...	56	51.6	-30.3	0	0	0	3.46999	0	0	0	0	0	0	0	0	low
474	466	PC-3p-68730_14	TGTTTGACAATGGCAGCATC	20	4	+	16819689	16819776	atctgttgtggatctcccaaaatactctatttgagaaaacgtttctcaaatgtccttaatttctgagTGTTTGAGAATGGCAGCATCt	0						3'	New	gp4	...((((((...((((...(((((((((((((((((((...)))))))))))............))))))))))))...))))))...	82	36.4	-23.7	3.50002	7.95013	1.03181	0	0	2.55272	0	0	1.73352	3.04285	0	0	low
204	196	PC-5p-349490_2	AGGAGTCGGGAAGGGGTG	18	4	+	37826484	37826587	gtctcttgccctcgAGGAGTCGGGAAGGGGTGtgctggggagatgtgtttgagtgtttttcagtgcataccgatttatttttagctcccagagaagcaggatgt	0						5'	New	gp4	...((((((.(((..(((((..((((..(((((((..(..(((..(......)..)))..)...)))))))..)))....)..)))))..)))..))))))...	98	50	-36.6	0	0	0	3.46999	0	0	0	0	0	0	0	0	low
232	224	PC-5p-291770_2	ATTAGGGGAGTAGAGCCAGTT	21	4	+	38940691	38940806	aatttctatatttcccatgtggtttttatgtttaatATTAGGGGAGTAGAGCCAGTTaacatttagggagttatctgttttcatcttgaggtggccaatatggggatgtggaattt	0						5'	New	gp4	...(((((((.((((((((((((.........((...((((((....(((((.((.((((.........)))).)))))))..))))))..))))).))))))))))))))))...	110	35.3	-26.3	0	0	1.03181	3.46999	0.819882	0	0.770496	0.718339	0	0	1.24064	2.71107	low
90	115	mdo-miR-599-5p_R-1_1ss9TG	TTTGATAAGCTGACATGGGACA	22	4	+	40328415	40328516	aaaggcatgctgtccatagtgtgTTTGATAAGCTGACATGGGACAgggattcttttcactgTTGTGTCAGTTTATCAAACCCatacatggacgacagtcaat	16	bta-mir-599,bta-mir-875,bta-mir-875,cfa-mir-599,cfa-mir-875,cfa-mir-875,hsa-mir-599,hsa-mir-875,hsa-mir-875,ptr-mir-599,ptr-mir-875,ptr-mir-875,ppy-mir-875,ppy-mir-875,mml-mir-875,mml-mir-875,mmu-mir-599,mmu-mir-875,mmu-mir-875,rno-mir-875,rno-mir-875,mdo-mir-599,mdo-mir-875,oan-mir-875,	mdo-mir-599	ctgtccagagtgtgTTTGATAATCTGACATGGGACAGaggttcttttcactGTTGTGTCAGTTTATCAAACccatacctggat	mdo-miR-599-5p	TTTGATAATCTGACATGGGACAG	5'	Diff	gp2	...(((.((..((((((.(((((((((((((((((((((..((((((((.....))).))))))))))))))))))))))..))))))))))..)))))...	96	42.2	-45.7	668.503	515.433	560.274	603.779	599.333	403.33	513.921	749.227	429.046	662.327	602.333	556.447	middle
90	116	bta-miR-599_L-1R+2	TTGTGTCAGTTTATCAAACCC	21	4	+	40328415	40328516	aaaggcatgctgtccatagtgtgTTTGATAAGCTGACATGGGACAgggattcttttcactgTTGTGTCAGTTTATCAAACCCatacatggacgacagtcaat	16	bta-mir-599,bta-mir-875,bta-mir-875,cfa-mir-599,cfa-mir-875,cfa-mir-875,hsa-mir-599,hsa-mir-875,hsa-mir-875,ptr-mir-599,ptr-mir-875,ptr-mir-875,ppy-mir-875,ppy-mir-875,mml-mir-875,mml-mir-875,mmu-mir-599,mmu-mir-875,mmu-mir-875,rno-mir-875,rno-mir-875,mdo-mir-599,mdo-mir-875,oan-mir-875,	bta-mir-599	aaagacgtgctgtccacagtgtgtttgataagctgacatgggacagggactcttttcactGTTGTGTCAGTTTATCAAACccatacgtggatgac	bta-miR-599	GTTGTGTCAGTTTATCAAAC	3'	Diff	gp2	...(((.((..((((((.(((((((((((((((((((((..((((((((.....))).))))))))))))))))))))))..))))))))))..)))))...	96	42.2	-45.7	287.001	204.053	185.726	232.49	282.859	188.902	171.821	215.502	124.813	177.5	291.551	189.775	middle
240	232	PC-3p-158767_4	TTTCTGCAGATGTCTTGTGACC	22	4	-	46192572	46192631	cctcacagcacctgcagttgaggaacattacttccTTTCTGCAGATGTCTTGTGACCcgg	0						3'	New	gp4	..((((((((.((((((..((((((......)))))).)))))).)))..))))).....	53	51.7	-23.3	1.75001	0	0	3.46999	0	0	2.31149	0.718339	0.86676	0	0.620322	1.35553	low
229	221	PC-5p-152073_4	GTGGGCTGGGGAAGTGCT	18	4	-	46460093	46460167	agtGTGGGCTGGGGAAGTGCTctggggcagccctggaagggtggtaagagccccaagcaattttcagtctgctac	0						5'	New	gp4	...(..(((((..((..((((.((((((.((((.....)))).......)))))))))).))..)))))..)...	69	58.7	-34.8	0	0	0	3.46999	1.63976	1.27636	0	0	0	1.01428	0	0	low
256	248	PC-5p-300380_2	GGCTTAGTGAGATCTCTG	18	4	-	63381044	63381133	tGGCTGAGTGAGATCTCTGacgtggcacagctcaagtcctcatggcagaaggtgcagcagctgtgcgatatctcagtgtctgcttagaag	0						5'	New	gp4	...((((((.((((..((((.((.((((((((...((((((......).))).))...)))))))).))...)))).))))))))))...	84	53.3	-31.2	0	0	0	5.20499	0	0	0	0	0	0	0	0	low
251	243	PC-3p-76751_12	TATTCAAACGAGAACTTTG	19	4	+	81803927	81804012	tgtggggccatgtgtcagtccaatcattttgtttaaccacatatgttTATTTAAACGAGAACTTTGgactcaaatattgtccctgt	0						3'	New	gp4	...(((((.((((...(((((((...((((((((((..((....))....))))))))))...)))))))...)))).)))))...	80	37.2	-27	3.50002	5.30008	1.03181	0	3.27953	3.82909	6.16397	2.15502	0.86676	0	1.86097	0	low
101	127	bta-mir-2310-p5_1ss3TG	TGGTTTGTTTGGGTTTGTT	19	4	-	89089747	89089837	tggctttcctgtTGGTTTGTTTGGGATTGTTttgcagcagcctctgtgtgctatttgtcaacttcccatcacctgccaaccttcagagaca	11	bta-mir-2310,bta-mir-1814c,bta-mir-331,eca-mir-331,aja-mir-331,hsa-mir-331,ptr-mir-331,ppy-mir-331,ggo-mir-331,mml-mir-331,mmu-mir-331,	bta-mir-2310	ggttttttGTTTTGTTTGGGTTTGTTTCTggatgccagggaaaacctggacctgtctctgaacc	bta-mir-2310-p5	tGTTTTGTTTGGGTTTGTT	5'	New	gp2	.(.((((...((((((..((.((((((((....(((((((...)))).))).......)))..)))))..))..))))))....)))).).	89	47.3	-21.6	18.3751	24.5129	12.3818	11.2775	19.6772	12.1254	17.7214	14.7259	17.3352	7.60712	15.1979	15.2498	middle
438	430	PC-5p-123442_6	TAGGAAAAGGGAAGAAGACAAT	22	4	-	91061793	91061865	atgaagaggTAGGAAAAGGGAAGAAGACAATctgactgaagtatggctttccttccttttcctccttcttgtt	0						5'	New	gp4	...((((((.(((((((((((.((((.((..((......))..))..)))).))))))))))).))))))...	67	41.1	-25.9	3.50002	2.65004	2.06363	0	0.819882	0	0.770496	1.43668	1.73352	0	0.620322	0	low
250	242	PC-3p-477431_2	CCGGGGGAGAGGGTGTAAA	19	4	-	93113860	93113923	tgggctcgctgctcctccgtggtcgctgagaaggatttgggtggaCCGGGGGAGAGGGGGTAAA	0						3'	New	gp4	...((((.((.((((((((...((((..(((....)))..))))..)))))))))).))))...	58	64.1	-26.6	3.50002	0	0	1.735	0	1.27636	0	0	0	0	0	0	low
284	276	PC-3p-461282_2	GTGAACTGTGGTGTAGGTG	19	4	+	97227372	97227440	atgcctgtggtgtgcatcatgctgtcacgtcagagtccacGTGAACTGTGGTGTATGTGccacaggatt	0						3'	New	gp4	...(((((((((((((((((....((((((........))))))...)))))))))..))))))))...	63	52.2	-31.3	3.50002	0	0	0	0	0	0	0	0	0	0	0	low
296	288	PC-5p-145723_5	ACTTGGTCAAACTTGGTC	18	4	+	97598357	97598486	cactctagcctgactgggggagtccagcccctctgtggacaaTCTTGGTCAAACTTGGTCaagagggacattttccctaccccgtggaccagaggcagtcctcagagagggcccctggtctgccagaggt	0						5'	New	gp4	..((((.((..(((..(((.......(((((((((.((((..((((((((..((..(((....(((((.....))))))))..)).))))).)))..)))).))))).)))))))..))).)).))))..	126	59.2	-60.2	0	0	0	10.41	0	0	0	0	0	0	0	0	middle
309	301	PC-3p-161470_4	TTTCTCTGATGAGAACATTT	20	4	+	98531156	98531286	nnntgccagggggtgtcaggaaaccattataggaaagatgatctctaggggaacttgacaagcaaaaaggagtTTTCTCTGTTGAGAACATTTtcagtctgataatggaagcgccacagcctttgtcaaga	0						3'	New	gp4	...((.((..((.(((..((...(((((((..((((((((.((((((((..(((((.............)))))..).)))..)))).))))))...))..))))))).....))))).))..)).))...	125	42.7	-35.1	5.25002	0	0	0	0.819882	1.27636	0.770496	0	0	0	0.620322	0	low
387	379	PC-3p-424016_2	TTTCTTCCTCTCATCTCGGGA	21	4	-	100602684	100602741	gaaatcctggatcagaggaagctgtgatgttctTTTCTTCCTCTCATCTCGGGAtgca	0						3'	New	gp4	...(((((((((.((((((((....(.....)....)))))))).))).))))))...	52	46.6	-22.4	0	0	0	3.46999	0	0	0	0	0	0	0	0	low
3	3	ssc-miR-9-2	TCTTTGGTTATCTAGCTGTATGA	23	4	-	102543244	102543336	ggcggggttggttgttaTCTTTGGTTATCTAGCTGTATGAgtggtgtggagtcttcaTAAAGCTAGATAACCGAAAGTaaaaataaccccata	21	ssc-mir-9-1,ssc-mir-9-3,ssc-mir-9-2,bta-mir-9-1,eca-mir-9a-2,eca-mir-9a,cfa-mir-9-3,cfa-mir-9-2,cfa-mir-9-1,hsa-mir-9-3,ptr-mir-9-1,ppy-mir-9-2,mml-mir-9-3,cgr-mir-9,mmu-mir-9-2,rno-mir-9a-3,mdo-mir-9a-3,mdo-mir-9a-1,sha-mir-9,oan-mir-9-1,oan-mir-9-2,	ssc-mir-9-2	ggaagcgagttgttaTCTTTGGTTATCTAGCTGTATGAgtgtattggtcttcataaagctagataaccgaaagtaaaaactccttca	ssc-miR-9-2	TCTTTGGTTATCTAGCTGTATGA	5'	Yes	gp2	...(((((((....(((..(((((((((((((((.((((((.((.......)))))))).)))))))))))))))..)))...)))))))...	87	40.9	-41.7	303.626	336.555	89.7677	109.305	211.12	253.996	164.501	261.475	139.548	120.193	214.942	181.303	middle
3	4	bta-miR-9-3p_L-1R+5	TAAAGCTAGATAACCGAAAGT	21	4	-	102543244	102543336	ggcggggttggttgttaTCTTTGGTTATCTAGCTGTATGAgtggtgtggagtcttcaTAAAGCTAGATAACCGAAAGTaaaaataaccccata	21	ssc-mir-9-1,ssc-mir-9-3,ssc-mir-9-2,bta-mir-9-1,eca-mir-9a-2,eca-mir-9a,cfa-mir-9-3,cfa-mir-9-2,cfa-mir-9-1,hsa-mir-9-3,ptr-mir-9-1,ppy-mir-9-2,mml-mir-9-3,cgr-mir-9,mmu-mir-9-2,rno-mir-9a-3,mdo-mir-9a-3,mdo-mir-9a-1,sha-mir-9,oan-mir-9-1,oan-mir-9-2,	bta-mir-9-1	ggaggcccgtttctcTCTTTGGTTATCTAGCTGTATGagtgccacagagccgtcATAAAGCTAGATAACCGaaagtagaaatgactctca	bta-miR-9-3p	ATAAAGCTAGATAACCG	3'	Diff	gp2	...(((((((....(((..(((((((((((((((.((((((.((.......)))))))).)))))))))))))))..)))...)))))))...	87	40.9	-41.7	13.1251	11.9252	3.09544	2.6025	9.42864	10.8491	5.39347	6.46505	4.76718	5.07142	9.92515	9.82762	middle
54	73	ssc-miR-190b	TGATATGTTTGATATTGGGTTG	22	4	+	104457796	104457901	aaagctctcctgcctgcttctgtgTGATATGTTTGATATTGGGTTGtttaattaggaaccaACTAAATGTCAAACATATTCTTacagcagtaggcaattcggcatc	11	ssc-mir-190b,bta-mir-190b,eca-mir-190b,cfa-mir-190b,hsa-mir-190b,ptr-mir-190b,ggo-mir-190b,mml-mir-190b,cgr-mir-190b,mmu-mir-190b,mdo-mir-190b,	ssc-mir-190b	tgcttctgtgTGATATGTTTGATATTGGGTTGtttaattaggaaccaactaaatgtcaaacatattcttacagcagtaggcaa	ssc-miR-190b	TGATATGTTTGATATTGGGTTG	5'	Yes	gp2	...(((....((((((((.(((((.(((((((((((((((..(((((((......))).))))..)))))))))))))))..))))).))))))))....)))...	100	38.7	-44.2	11.3751	10.6002	7.7386	7.80749	9.42864	16.5927	10.0164	6.10588	4.76718	11.1571	7.44387	7.79432	middle
167	159	PC-3p-1880582_1	TGAACACAGCAGGGACCCTTCA	22	4	+	105093400	105093461	cttggggtccctctgcgtgcatgaggcactgagccctgcaTGAACACAGCAGGGACCCTTCA	0						3'	New	gp4	...((((((((((((.((.((((.(((.....)))...)))).)).))).)))))))))...	56	61.3	-31.5	0	0	0	3.46999	0	1.27636	0	0.718339	0	0	0	0	low
34	46	ssc-miR-137	TTATTGCTTAAGAATACGCGTAG	23	4	-	131567036	131567124	ctgactctcttcggtgacgggtattcttgggtggataatacggattacgttgTTATTGCTTAAGAATACGCGTAGtcgaggagagtacc	9	ssc-mir-137,bta-mir-137,eca-mir-137,cfa-mir-137,ptr-mir-137,cgr-mir-137,rno-mir-137,mdo-mir-137a,oan-mir-137a,	ssc-mir-137	actctcttcggtgacgggtattcttgggtggataatacggattacgttgTTATTGCTTAAGAATACGCGTAGtcgaggagag	ssc-miR-137	TTATTGCTTAAGAATACGCGTAG	3'	Yes	gp2	...(((((((((((..(((.((((((((..(..(.(((((((.....)).))))))..)..)))))))).)))..)))))))))))...	83	46.1	-42.8	3.50002	2.65004	4.12725	3.46999	0	7.65817	12.3279	8.62007	1.73352	10.1428	10.5455	2.71107	middle
235	227	PC-5p-443336_2	CTGCTGCAAGGTTGCCCT	18	4	-	134358495	134358586	actgggaattCTGCTGCAAGGTTGCCCTcggggtgtggatcccaggggggcatccaccacccaggctcagcatccccagcagagagcccgcc	0						5'	New	gp4	...(((..((((((((...((.((((((.(((..(((((((((....))).))))))..))))))....))).)).))))))))..)))...	86	66.3	-45.9	0	0	0	3.46999	0	0	0	0	0	0	0	0	low
349	341	PC-5p-102795_8	GCCGAGGAGCCGTGAGCTC	19	4	+	138967539	138967669	nttgccgaggaagaggggtctctgctggtcactGCAGAGGAGCCGTGAGCTCtctggtgacaccgctctgtccttccatgctccaagctccttctgcgaattgcagcaagttctcagttcaccaaggctgc	0						5'	New	gp4	...(((...(((..(((..((.(((((.....(((((((((((...((((.....((.((((......)))))).....))))...))))).)))))).....)))))))..)))..))).....)))...	125	57.3	-46.7	5.25002	0	1.03181	0	0	1.27636	0.770496	0.718339	0.86676	0	0	0.677767	low
81	73	PC-5p-53802_21	CACTCCTCCCCTGTGTGCCAGGT	23	5	-	4411882	4412022	cctgtcttagctcatttggtgaaatggcagccatcttagCACTCCTCCCCTGTGTGCCAGGTcctgggctagaagctggcacaggggggtggggagcggggactggtagtgcatagcagccagcactgtgcctgggactcg	0						5'	New	gp4	...(((..(((.((.(((((......((((((((((..((.((((.((((..((((((((.((........))..))))))))..)))).)))).))..))).))))..)))......)))))...)).)).)..)))...	135	61	-60.7	3.50002	1.32502	1.03181	3.46999	3.27953	0	2.31149	2.87336	3.46704	4.05713	4.34225	8.1332	low
344	336	PC-5p-72053_13	AATTCTAGGGTAGGAAGCCAGTT	23	5	-	5294044	5294130	AATTCTAGGGTAGGAAGCCAGTTtttggaagatggtttatttaaCTGTATCTTATCCTAGATAGAcggctgtttctttcctgttaat	0						5'	New	gp4	...((((((((((((...(((((....(((.....)))....)))))..))))))))))))..(((((...........)))))...	58	35.6	-21.6	0	1.32502	1.03181	1.735	1.63976	1.27636	2.31149	1.43668	3.46704	2.02857	1.86097	0.677767	low
333	325	PC-3p-95331_9	TCACAGCCCCTCCCCGCCAGT	21	5	-	7565295	7565422	ctgggggccacctagagggaggaggtgctgacgggcaggcagcgggctgggcggggccagaggagggcttggtggccTCACAGCCCCTCCCCGCCAGGacaagcgcttcacctcggggaagtaccaag	0						3'	New	gp4	.(((..((..((..((((...((((((((....(((.((.((.((((((...((((((((((.....)))..))))))).)))))))).)).)))......)))))))).))))..))..)).)))..	125	71.1	-60.1	0	0	1.03181	0	0	1.27636	0.770496	0.718339	1.73352	3.04285	1.24064	0.677767	low
275	267	PC-5p-74132_13	ACGGCAAGAGGCTTGTGTTT	20	5	-	9353024	9353094	aacgcACTGCAAGAGGCTTGTGTTTtcacagagaagttgctggaaagagaactcgagaccttcagcgccct	0						5'	New	gp4	...((.(((...((((((((.((((((.(((........)))....)))))).)))).))))))).))...	65	50.7	-20.8	1.75001	7.95013	4.12725	0	4.09941	0	3.85248	4.31003	3.46704	0	3.72193	1.35553	low
465	457	PC-3p-50812_22	TTAAGGACGAGAAAACAGA	19	5	+	17513536	17513665	tccggggcacttgctttgctcccttgcctccttcccctctttttggtgaatcctcagctacctatttaaatgctgtTTAAGGACGAGAAAAGAGAgagctgagaaaggattctgagccaccttcccctta	0						3'	New	gp4	...((((.....((((.....((((..(((.(((..((((((((..((..((((((((.............))))....)))))).)))))))).)))..))).)))).....))))......))))...	124	48.5	-33.5	0	0	1.03181	0	0	1.27636	0	0	0	0	0	19.6552	middle
365	357	PC-3p-236926_3	ATGGTACTGTCACCCCTT	18	5	+	18854811	18854900	taggagactgggggcagcggcagtggcagggagagaggccccccaggggcagcttttctcatctacATGGTACTGTCACCCCTTctcagc	0						3'	New	gp4	...((((..((((((((..((..((..(((((((((((((((....)))..))))))))).))).))..)).))))).)))..))))...	84	62.2	-39.4	0	3.97506	0	0	0	0	0	0	0	0	0	0	low
60	78	ssc-miR-196a	TAGGTAGTTTCATGTTGTTGGG	22	5	-	19655003	19655091	tcagctgatctgtggctTAGGTAGTTTCATGTTGTTGGGattgagttttgaactcggcaacaagaaactgcctgagttacatcagtcgg	30	ssc-mir-196a-2,ssc-mir-196a-1,ssc-mir-196b-1,ssc-mir-196b-2,bta-mir-196a-2,bta-mir-196a-1,bta-mir-196b,eca-mir-196a,eca-mir-196b,cfa-mir-196a-2,cfa-mir-196a-1,cfa-mir-196b,hsa-mir-196a-2,hsa-mir-196a-1,hsa-mir-196b,ptr-mir-196a-1,ptr-mir-196b,mml-mir-196b,age-mir-196,lla-mir-196,cgr-mir-196a,cgr-mir-196c,cgr-mir-196b,mmu-mir-196a-1,rno-mir-196a,rno-mir-196c,mdo-mir-196a,mdo-mir-196b,oan-mir-196a,…	ssc-mir-196a-1	ctgagtgaatTAGGTAGTTTCATGTTGTTGGGcctggatttctgaacacaacgacattaaaccacccgactcacggcagt	ssc-miR-196a	TAGGTAGTTTCATGTTGTTGGG	5'	Yes	gp2	...(((((..(((..(((((((((((((.(((((..(((.(..(...)..).)))..))))).)))))))))))))..))))))))...	83	44.9	-42.6	1.75001	1.98753	2.06363	0.867499	0	1.27636	5.00822	0.718339	0.86676	2.53571	1.24064	1.35553	low
39	53	ssc-miR-148b-3p	TCAGTGCATCACAGAACTTTGT	22	5	+	20388181	20388273	caccattagcatttgaggtGAAGTTCTGTTATACACTCAGGCTgtggctctctgaaagTCAGTGCATCACAGAACTTTGTctcgaaagctttc	31	ssc-mir-148b,ssc-mir-148a,ssc-mir-152,bta-mir-148b,bta-mir-152,oar-mir-152,eca-mir-148b,cfa-mir-148b,cfa-mir-148a,cfa-mir-152,hsa-mir-148b,hsa-mir-148a,hsa-mir-152,ptr-mir-148b,ptr-mir-148a,ptr-mir-152,ppy-mir-152,ggo-mir-148b,ggo-mir-152,ggo-mir-148a,cgr-mir-148b,cgr-mir-152,mmu-mir-148b,mmu-mir-152,mmu-mir-148a,rno-mir-148b,rno-mir-148a,rno-mir-152,mdo-mir-148,mdo-mir-152,oan-mir-148,	ssc-mir-148b	atttgaggtGAAGTTCTGTTATACACTCAGGCtgtggctctctgaaagTCAGTGCATCACAGAACTTTGTctcgaaagct	ssc-miR-148b-3p	TCAGTGCATCACAGAACTTTGT	3'	Yes	gp2	.......(((.(((((((..(((((((((.((.((((..((((.............)))))))).)).)))))))))..))))))).)))...	83	44.1	-33.5	12300.8	12470.4	10015.8	10464.6	11892	9799.27	11306.6	12422.2	11989	15266	13758.7	11111	high
239	231	PC-3p-132790_5	TCAGTCTCCCCTCCATCCCACA	22	5	-	20447395	20447497	gtggcaggggtggggtgggggaggagtctggtgcaagcgggttccttcctggctgggccccaaaggcgctTCAGTCTCCCCTCCATCCCACAgcaagaatctc	0						3'	New	gp4	...((....((((((((((((.((((.(((((((....(((..((.........))..)))....))))..))).)))))))))))))))).)).........	91	65	-50.4	0	0.66251	2.06363	1.735	1.63976	2.55272	1.15574	0.718339	1.73352	5.07142	1.24064	1.69442	low
144	136	PC-5p-379868_2	CACGCGGTAATTCAGTGGCTGA	22	5	-	20835239	20835295	aCACGTGGTAATTCAGTGGCTGAtgaactgaagcgcagccactggagtctccgcaag	0						5'	New	gp4	....((((...(((((((((((.((........)))))))))))))....))))...	50	54.4	-25.3	0	3.97506	0	1.735	0	2.55272	0	0	0	0	0	0	low
342	334	PC-3p-938019_1	CTGTCTCCCTTGCTCTACCAGCCTTA	26	5	+	22811814	22811916	gacaaggttggggcggggccagggaacaggatgcctaggtcctcagttcctaccagtaagtccctaggcctctgtCTGTCTCCCTTGCTCTACCAGCCTTAcc	0						3'	New	gp4	...((((((((...(((((.((((((((((..(((((((..((...............))..))))))).....))))).))))).))))).))))))))...	97	59.2	-44.4	0	0	0	3.46999	0	0	0.770496	0	0	1.01428	0	0	low
283	275	PC-5p-415695_2	TTAGGAGAGGAGCTGAGAAA	20	5	+	23214629	23214767	gaatcgagttaggctgggtacagagcaggcagtcatacctgTTAGGAGAGGAGCTGAGAAAggggctgagccggactgacccccttccaactccctccacacaggtgggtgaactccctgcagccggccagagtgaccc	0						5'	New	gp4	...(((..((.((((((.......(((((.((((((((((((..((((.((((.((.(((.((((..(........)..)))).))))).))))))))..))))))..)))).)).)))))..))))))))..)))...	133	60.4	-55.1	0	0	0	0	0	2.55272	0	0.718339	3.46704	0	1.24064	0	low
338	330	PC-3p-334777_2	CATCCTGACTTGTGTCTCCC	20	5	+	24787324	24787443	ggaagcaacagagctgcaggtaagactgagatgtgggggaatcacaggcaggcaggccattgctttgcatggcCATCCTGACTTGTGTCTCCCgcattttagccagctttgtccgctgcc	0						3'	New	gp4	((.(((.(((((((((.........(((((((((((((((..((((((((((..((((((.((...))))))))..)))).))))))))))))))))))))).)))))))))..))).))	120	55.8	-61.9	0	0	0	3.46999	0	0	0	0	0	0	0	0	low
38	31	PC-3p-78451_12	TCACAAGTATTTGCATCGTTGT	22	5	+	24827232	24827305	agagaccgatgatgcaaacactggtgttcctgtaaatttaataaagggTCACAAGTATTTGCATCGTTGTcatt	0						3'	New	gp4	...((.((((((((((((.(((.(((..(((.............)))..))).))).))))))))))))))...	68	37.8	-27.2	0.875004	1.32502	2.06363	0.867499	3.68947	0	0.770496	0.359169	0.43338	1.52142	1.86097	0.677767	low
373	365	PC-5p-103233_8	TCTCGCAGGAAACAGTTT	18	5	+	26793455	26793555	catcacaatgttcggagcctcaaatTCTCTCAGGAAACAGTTTatttagcttctgtctttaaactctgtcctctggaatttgaaggctggacattgtgggc	0						5'	New	gp4	..(((((((((((..(((((((((((((...((((...((((((....((....))...))))))...))))..)))))))).))))))))))))))))..	97	42.6	-38.6	0	3.97506	2.06363	1.735	0	1.27636	0.770496	0	0	0	0	0.677767	low
126	155	ssc-let-7i_R+3	TGAGGTAGTAGTTTGTGCTGTT	22	5	+	30021209	30021319	cccgacaccatggccctggcTGAGGTAGTAGTTTGTGCTGTTggtcgggttgtgacattgcccgctgtggagataaCTGCGCAAGCTACTGCCTTGCTagtgctggtgatg	29	ssc-let-7i,ssc-let-7g,bta-let-7i,bta-let-7g,bta-let-7b,oar-let-7b,eca-let-7g,cfa-let-7g,cfa-let-7b,hsa-let-7g,hsa-let-7b,ptr-let-7i,ptr-let-7b,ppy-let-7b,ggo-let-7i,ggo-let-7g,ggo-let-7b,cgr-let-7i,cgr-let-7g,cgr-let-7b,mmu-let-7j,mmu-mir-3970,mmu-let-7b,rno-let-7b,mdo-let-7b,sha-let-7i,sha-let-7g,oan-let-7g,oan-let-7b,	ssc-let-7i	ctggcTGAGGTAGTAGTTTGTGCTgttggtcgggttgtgacattgcccgctgtggagataactgcgcaagctactgccttgctag	ssc-let-7i	TGAGGTAGTAGTTTGTGCT	5'	Diff	gp2	.....((((..(((.(((((.(((((((((((((((((.(((((.(((((.........)))))))........))).)))))))))))))))))))))).)))))))...	103	56.8	-52.5	98114.2	102910	95169.8	85786.1	84749.5	78255.7	94085.7	89920.9	71694.1	97179.5	83242.9	64170.3	high
126	156	cgr-let-7i_R+1	CTGCGCAAGCTACTGCCTTGCT	22	5	+	30021209	30021319	cccgacaccatggccctggcTGAGGTAGTAGTTTGTGCTGTTggtcgggttgtgacattgcccgctgtggagataaCTGCGCAAGCTACTGCCTTGCTagtgctggtgatg	29	ssc-let-7i,ssc-let-7g,bta-let-7i,bta-let-7g,bta-let-7b,oar-let-7b,eca-let-7g,cfa-let-7g,cfa-let-7b,hsa-let-7g,hsa-let-7b,ptr-let-7i,ptr-let-7b,ppy-let-7b,ggo-let-7i,ggo-let-7g,ggo-let-7b,cgr-let-7i,cgr-let-7g,cgr-let-7b,mmu-let-7j,mmu-mir-3970,mmu-let-7b,rno-let-7b,mdo-let-7b,sha-let-7i,sha-let-7g,oan-let-7g,oan-let-7b,	cgr-let-7i	tggctgaggtagtagtttgtgctgttggtcgggttgtgacattgcccgctgtggagataaCTGCGCAAGCTACTGCCTTGCtagtgctgg	cgr-let-7i	CTGCGCAAGCTACTGCCTTGC	3'	Diff	gp2	.....((((..(((.(((((.(((((((((((((((((.(((((.(((((.........)))))))........))).)))))))))))))))))))))).)))))))...	103	56.8	-52.5	388.502	300.78	316.767	461.509	403.382	511.821	248.87	295.956	285.164	211.985	449.113	408.694	middle
115	107	PC-3p-127667_5	CTGGCTTCGGTCCGCGCGGC	20	5	+	32052726	32052794	atccgggcccgcgggccgtcgtccgcactctccatgaggctgCTGGCTTCGGTCCGCGCGGCgccgaca	0						3'	New	gp4	...(((((((((((((((..(((.(((..(((...)))..))).)))..))))))))).))).)))...	63	75.4	-41.5	0	0	5.15907	0	0	2.55272	0.770496	0.718339	0.86676	0	1.24064	2.0333	low
463	455	PC-3p-55284_20	TACTGAAAAGTTTGAAAGCATT	22	5	+	45601811	45601898	ttttttgtgaaTGCTTTCAAACTTTTCAGTATcaaacttcatttgcaaaaactttgaTACTGAAAAGTTTGAAAGCATTcacaaactg	0						3'	New	gp4	...(((((((((((((((((((((((((((((((((................)))))))))))))))))))))))))))))))))...	82	28.4	-46.2	5.25002	0	2.06363	1.735	1.63976	0	1.54099	4.31003	1.73352	0	1.24064	2.0333	low
62	81	bta-miR-200c	TAATACTGCCGGGTAATGATGGA	23	5	-	66194075	66194169	ggcggggtgggggcccccgtcttacccagcagtgtttgggtgctgcttgcgagtctcTAATACTGCCGGGTAATGATGGAggcccctgcccctgt	20	bta-mir-200c,bta-mir-200b,eca-mir-200c,eca-mir-200b,cfa-mir-200c,cfa-mir-200b,hsa-mir-200c,hsa-mir-200b,ptr-mir-200c,ggo-mir-200c,ggo-mir-200b,cgr-mir-200c,cgr-mir-200b,mmu-mir-200c,mmu-mir-200b,rno-mir-200b,mdo-mir-200c,mdo-mir-200b,sha-mir-200b,oan-mir-200b,	bta-mir-200c	cgtcttacccagcagtgtttgggtgctggttgggagtctcTAATACTGCCGGGTAATGATGGAgg	bta-miR-200c	TAATACTGCCGGGTAATGATGGA	3'	Yes	gp2	...((((..((((((.(((((((((((.((((((((.((((((.....)))...))).)))))))).)))))).))))).))))))..))))...	89	64.2	-62.5	48.1252	40.4131	31.9862	34.6999	28.2859	20.4218	28.1231	19.036	20.3689	28.9071	34.4279	20.333	middle
424	416	PC-3p-123166_6	TCTCTCTGGTCTGGCTCTGCCT	22	5	+	67035121	67035237	gaagccctggtcccagcagagccggaacccggagaggctatagggaagggctgggagccacagcgaacccagagcccgccTCTCTCTGGTCTGGCTCTGCCAcggactgggtgtggc	0						3'	New	gp4	...((((..((((..(((((((((((.((.((((((((....(((.....(((((.((....))...)))))..)))))))))).).)))))))))))))...))))..)).))...	111	67.5	-64.9	1.75001	0	2.06363	1.735	2.45964	3.82909	2.31149	2.15502	0	10.1428	1.86097	0	middle
415	407	PC-3p-72778_13	TGGCTGCTCTCGTCCATCCCAGTT	24	5	+	69622862	69622939	gctggccgggggtgggcagcggccatccggctccctctcatgcTGGCTGCTCTCGTCCATCCCAGCTcctcggcttca	0						3'	New	gp4	...((((((((((((((((((((((....((..........))))))))))...))))))))).......)))))...	72	70.5	-34.4	1.75001	1.32502	4.12725	1.735	0	0	2.31149	1.43668	0	0	1.86097	4.74437	low
185	177	PC-3p-5389_503	AGTAAGGTCAGCTAAGCTA	19	5	+	71704354	71704449	gaatagggagaatgttgattttaagctcctggagccttcaggatggggttatttgccagggAGTCAGGTCAGCTAAGCTAcgccctttccctacct	0						3'	New	gp4	...((((((((..((....((((.((((((((..((((..((.(..(....)..)))))))..)))))..)))))))....))..))))))))...	90	50	-27.9	89.2504	83.4763	43.3361	55.5199	56.5718	56.1599	31.5903	27.2969	24.2693	13.1857	34.1177	25.0774	middle
244	236	PC-5p-27863_53	AAATGAAAAGGATTGGTTTCTC	22	5	-	77831991	77832085	tgaaaaggattcttaacaaAAATGAAAAGGATTGGTTTCTCttatgttcctaatgagaagtcaatccttttcgtttttgttaggaatgcttttat	0						5'	New	gp4	..(((((.((((((((((((((((((((((((((..((((((((......))).)))))..)))))))))))))))))))))))))).)))))..	91	29.5	-48.7	10.5	2.65004	5.15907	8.67499	4.91929	5.10545	8.47546	6.46505	13.0014	4.05713	3.10161	5.42214	middle
367	359	PC-3p-98926_8	ATCTGCGGTTGGTTGAATCTGT	22	5	+	92085999	92086128	tccatagtaggccctctgttagcttcaggtttccaatctgcggattccaccaacggcacagatgtaaattttgATCTGCAGTTGGTTGAATCTGTgcatatgaaacctttggaggaccagcagctgtann	0						3'	New	gp4	...(((((.((.(((((.........(((((((......((((((((.((((((.(((((((.......))))...))).)))))).))))))))......)))))))..))))).))....)))))...	124	45.4	-40.5	0	0	1.03181	0	2.45964	0	0	2.15502	0.86676	2.02857	2.48129	4.0666	low
76	98	ssc-miR-331-3p_R-1	GCCCCTGGGCCTATCCTAGA	20	5	-	92224921	92225039	atcccaaggagtttggtttgtttgggtttgtTCTAGGTATGGTCCCAGGGATCccagatcaaaccagGCCCCTGGGCCTATCCTAGAaccaacctaaactcgcgcatcattcctggaat	14	ssc-mir-331,bta-mir-331,bta-mir-2310,bta-mir-1814c,eca-mir-331,aja-mir-331,hsa-mir-331,ptr-mir-331,ppy-mir-331,ppy-mir-331,ggo-mir-331,mml-mir-331,cgr-mir-331,mmu-mir-331,rno-mir-331,	ssc-mir-331	ttgtttgggtttgtTCTAGGTATGGTCCCAGGGATcccagatcaaaccagGCCCCTGGGCCTATCCTAGAAccaacctaa	ssc-miR-331-3p	GCCCCTGGGCCTATCCTAGAA	3'	Diff	gp2	...((.((((((.((((..(((((((((.((((((((.((((.(((((((..(.............)..))))))).)))))))))))).)))))))))..)).))..))))))))...	113	50.4	-54.9	796.254	779.112	2532.07	1908.5	1379.04	995.563	1504.78	1366.28	1637.31	2116.81	1907.49	1369.09	middle
490	482	PC-3p-171139_4	ACACGTAGCCTTTAAGTAGTG	21	5	+	93395359	93395500	cagatgtttctccaatttgccttattgttagattctattattGCTACTTAAAGGCTACATGCGctaacattaataatcgcACACGTAGCCTTTAAGTAGTGataatagattctcgtggggcataattatattgagcattatt	0						3'	New	gp4	..(((((((....((((((((..((....(((.((((((((..(((((((((((((((.((.((..............)).)).)))))))))))))))..)))))))).))).))..)))).)))).....)))))))...	137	33.8	-55.6	1.75001	3.97506	1.03181	3.46999	1.63976	0	0.770496	0	1.73352	0	1.86097	0	low
50	43	PC-3p-51474_22	TTCTACCTCTGCTCCTGGCCCAGT	24	5	+	110667464	110667575	gaggtgagttgggcagggtggacctgctgtcgggtaggaggtggggagaaaccagtgactcattgcTTCTACCTCTGCTCCTGGCCCAGGagtccacaccccagcttgcggt	0						3'	New	gp4	...(..(((((((....((((((((...((((((..(((((((((.((....(((((...))))))))))))))))...))))))...)).))))))..)))))))..)...	106	61.6	-52.6	1.75001	0	1.54772	0.867499	1.63976	1.27636	2.31149	2.51419	1.30014	3.04285	4.03209	2.71107	low
481	473	PC-5p-70704_14	TGTCCTGCCACCGCTCTGAGC	21	6	+	1759245	1759359	atgtccaggggcacgtctgcgcgtggccgggctTGTCCTGCCACCGCTCTGAGCctcggaccctctcgggcgcggggctgtggcgggtctggtcctgcacgttgcccctgggggt	0						5'	New	gp4	...((((((((((.......(((((.(.(((((...((((((((.((((((.(((.(((......)))))).)))))).))))))))...))))).))))))))))))))))...	109	73	-68.8	1.75001	3.97506	4.12725	1.735	3.27953	2.55272	1.54099	4.31003	0	2.02857	2.48129	0	low
269	261	PC-3p-105866_7	TCAGCCGCTGCCGGCTCGGC	20	6	+	2670138	2670218	ctctcagttctccgccttgcctgggcttcggacaggcctcgtcagatgccTCAGCCGCTGCAGGCTCGGCgggtctgaccc	0						3'	New	gp4	...((((..(.(((((..((((..((..(((..((((.((....)).))))...)))..))))))..)))))).))))...	75	67.9	-36.1	0	0	0	0	0	0	0	2.15502	3.46704	0	0.620322	0.677767	low
226	218	PC-5p-11885_171	CCCCCCACAACCACGTTTT	19	6	-	2841035	2841141	ctggctcaCCCCCCACAACCACGTTTCccacctgctccctgggcgaccgcccttcccgccgccgcccctcggagccagtgcatcgacaagttgtgccgggtgagtgt	0						5'	New	gp4	...((((((((..((((((...(((...(((..(((((..(((((...((.......))...)))))...)))))..)))....)))..))))))..))))))))..	102	69.2	-45	19.2501	19.8753	49.527	34.6999	49.1929	12.7636	30.0493	26.5785	20.8022	36.5142	31.6364	56.2547	middle
293	285	PC-3p-52509_21	ACCCAGCCTCAGTCCCCTCGAT	22	6	-	3622495	3622576	TCTCCGAGGGAACCGAGGCTGGCTgggtctcgaggtgggggccctctcgcttcacttccACCCAGCCTCAGTCCCCTCGATg	0						3'	New	gp4	....((((((.((.((((((((.((((....(((((((((....)))))))))...)))).)))))))).)).))))))...	75	67.1	-49.3	0	0	5.15907	5.20499	7.37893	6.38181	1.54099	0.718339	2.60028	1.01428	1.86097	2.0333	low
114	106	PC-3p-1737408_1	TGTGATGTCAACTCCTGAGGCCCT	24	6	-	9212794	9212899	gaggctggtgaccttctcaaggccgggcagccggcatcagagcgtggattcccactccgatccTGTGATGTCAACTCCTGAGGCCCCgagatgtcatcactgcgtg	0						3'	New	gp4	...(((((((((..((((..(((((((.((..(((((((.((..((((.......))))...)).)))))))..)))))..))))..)))).)))))))..))...	100	61.3	-41.9	0	0	0	0	0	0	0	0	3.46704	0	0	0.677767	low
199	191	PC-3p-239708_3	TATGTTGGAAGAAGCCACC	19	6	+	17204867	17204922	aggggcccttccccagcatacacatcaatgtgtcTATGTTGGAAGAAGCCGCCatc	0						3'	New	gp4	...(((.((((.((((((((.((((....)))).))))))))..))))..)))...	50	53.6	-20.4	1.75001	5.30008	0	0	0	0	0	0	0	0	0	0	low
227	219	PC-3p-62235_17	GTGCGCGGGAGGGGTGCG	18	6	-	28167226	28167324	tactctgcccgggccccctttccagctcgcacctcttgactccgggctactctcagaggcgtagggtgggagcttgccgaGTGCGCGGGCGGGGTGCGt	0						3'	New	gp4	(((((((((((.((...(((..((((((.(((((..((.(((.(((.....))).))).))..))))).)))).))..))).)).)))))))))))...	96	68.7	-48.7	0	1.32502	1.03181	3.46999	0.819882	5.10545	3.85248	0.718339	0.86676	0	0	0.677767	low
90	82	PC-5p-62180_17	GTCTCCTCCCGCCCCCCCGC	20	6	+	30828911	30828997	cccctcttGTCTCCTCCCGCCCCCTCGCttctgtcccacttcctgcactgtggttcctggctggtggccgggaggctgcataagtgt	0						5'	New	gp4	...((..(((..(((((((((.((..(((......((((..........)))).....))).)).)).)))))))..)))..))...	81	64.4	-31.2	3.50002	3.97506	2.06363	5.20499	0	1.27636	1.54099	0.718339	0	1.01428	2.48129	2.71107	low
323	315	PC-3p-61561_17	GCTCTCCCACCCCGGCCT	18	6	-	34273991	34274089	ggctgggcactgaaggagcagaggcaggtgtcaaagctctctatgtggggtcccctgcctagctctatctcgcactgctGCTCTCCCACCCCAGCCTca	0						3'	New	gp4	(((((((...((..((((((((((((((((....((((......(..((....))..)..)))).))))).)).)).)))))))..)).)))))))...	96	61.6	-41	0	2.65004	0	6.93999	4.09941	3.82909	3.08198	1.43668	0.86676	4.05713	0.620322	1.35553	low
479	471	PC-5p-395721_2	CAGGTGGCTGGAGGCCTCCCGGG	23	6	+	35262476	35262581	gacaatgcatagggcagaagtcgggctggcaagCAGGTGGCTGGAGGCCTCCCGGGggctgagagctgtctcacctccccctgggcctctgggcctcctggtgacc	0						5'	New	gp4	(((..(((.....)))...))).....((((..((((.(((..(((((((...(((((.(((((....)))))...))))).)))))))..).)).)))).)).))	79	67.9	-50.6	0	0	0	0	0	1.27636	0.770496	0	0	3.04285	1.24064	0.677767	low
223	215	PC-5p-90508_9	GAAAATGATGATTGGGCCA	19	6	-	38318701	38318799	GAAAATGAAGATTGGGCCAgactcaggaacttccgagggcctcccagttgcctaaagcagggtcctccgactttcactgtgtgggaactagtttttgtt	0						5'	New	gp4	...((..((((((((.((..((.((((((..((.((((((((......(((.....))))))))))).))..))).))).)).))..))))))))..))	96	50.5	-33.1	3.50002	2.65004	0	0	0.819882	0	0.770496	0.718339	1.73352	0	0	0	low
218	210	PC-3p-83475_11	CGGGAATGGGTGGGCTGGG	19	6	-	40236737	40236846	agccttcatcccttcttccagtccagcccctctgctccagggctacacctgctattctggccaggggtcccctcagCGGGAAGGGGTGGGCTGGGaggaaggaggagcca	0						3'	New	gp4	...((((.(((.(((((((((((((.((((((((((..((((..((.((((((.....)).)))).)).)))).)))))..)))))))))))))))))).)))))))...	104	64.5	-56.8	0	0	3.09544	0	0	2.55272	0	0.718339	1.73352	0	1.24064	0.677767	low
160	152	PC-3p-58589_18	TGCTCTGCTCCCCTGGCCCAGT	22	6	+	44166722	44166821	tgagtgagggcggccgggcccgggaggcgagggctgggctgtgccgccgcgcagcggtgttcacccTGCTCTGCTCCCCTGGCCCAGGcgtcttcatctg	0						3'	New	gp4	...(((((((((.(((((((.(((..((.(((((.(((.((...((((((...))))))..))))).)))))))..))).))))).)))))))))))...	94	74	-61	1.75001	3.97506	1.03181	3.46999	2.45964	3.82909	1.54099	0.718339	0.86676	1.01428	1.24064	2.0333	low
335	327	PC-3p-197381_3	ATGACGCCTCTACCTACT	18	6	-	45141176	45141257	cccgtgtagttgtgggtctctggcccatttgtgcgcccagttgcgacttcagccaaATGACGCCTCTACCTACTcgcatctc	0						3'	New	gp4	...((((....((((((....(((.((((((.((....(((....)))...))))))))..)))...))))))..))))...	76	57.3	-22.6	0	0	3.09544	0	0	0	0	0	0	0	0	0	low
325	317	PC-3p-94625_9	TCCCCCTGTCTGTGTCCCCCAGT	23	6	-	50004609	50004701	aggtggggggcatagccggggaggggcgatgggggcgaggctgtggcccctgtgacctagctcctccccTCCCCCTGTCTGTGTCCCCCAGAg	0						3'	New	gp4	...(((((((((((((.(((((((((....((((((.(((..(..(...)..)..))).)))))))))))))))..).))))))))))))...	87	72	-56.2	0	1.32502	1.03181	0	0	0	0.770496	1.43668	0.86676	1.01428	4.34225	0	low
99	125	oan-miR-1386_L+1	CCTCCTGGCTGGCTCGCCA	19	6	-	50241825	50241881	agcggcggggacgggggaggcgagtcgcgtgtgacgCCTCCTGGCTGCCTCGCCAgg	1	oan-mir-1386,	oan-mir-1386	aggttccggccagagtgggCTCCTGGCTGGCTCGCCAgacttctccatcaccgtggatggcacgaccatccttcccgtcccgcaggcccgcaatct	oan-miR-1386	CTCCTGGCTGGCTCGCCA	3'	Diff	gp2	...(((((((.((((((((((..((((....)))))))))))..))))))))))...	51	77.2	-33.2	0	0	0	3.46999	0	1.27636	0	0	0	0	0	0	low
379	371	PC-3p-89294_9	GGCCGGGAAGATGGCGGAT	19	6	+	50306567	50306704	tctttcgtcacttcctctctggcccctgtgcagtcgataaggaaacccggacgacaccgcggctttccttttttctagcGGCCGGGAAGATGGCGGATattcaggtgcgggctcggggctgacatcgaccctgcgcgg	0						3'	New	gp4	...(((((((((((((....((((.....((((.....((((((((((((......))).)).)))))))....)).)))))))))))).))))))).......(((((((.((((........)))).)))))))..	94	60.9	-53.7	15.7501	7.95013	7.22269	6.93999	4.91929	10.2109	5.39347	2.87336	9.53436	2.02857	8.06419	2.0333	middle
94	120	ssc-miR-671-5p_R-3	AGGAAGCCCTGGAGGGGCTGG	21	6	+	50707014	50707074	actgtccctctgggcagcctctggaagtggtgagcaaagaAGGAAGCCCAGGAGGGGCTGG	11	ssc-mir-671,bta-mir-671,eca-mir-671,aja-mir-671,cfa-mir-671,hsa-mir-671,ptr-mir-671,ggo-mir-671,cgr-mir-671,mmu-mir-671,rno-mir-671,	ssc-mir-671	caggaagaggAGGAAGCCCTGGAGGGGCTGGAGGtgatggatgttttccTCCGGTTCTCAGGGCTCCACCttttccgggc	ssc-miR-671-5p	AGGAAGCCCTGGAGGGGCTGGAGG	3'	Diff	gp2	...((((((((((((..(((((....((.....))..)).)))..))))).)))))))...	55	62.3	-27.5	0.875004	0	6.70678	0.867499	1.22982	3.82909	0	0.359169	1.73352	2.02857	3.10161	1.01665	low
95	121	ssc-miR-935_L-1R-1	CAGTTACCGCTTCCGCTACCG	21	6	+	53057489	53057595	caaggccggcgggggcgcaggcggcagtggcgggagcggcccctcggccatcctccgtctgccCAGTTACCGCTTCCGCTACCGccgccgctcccgctctagctccc	4	ssc-mir-935,bta-mir-935,ptr-mir-935,mmu-mir-935,	ssc-mir-935	ggcgcaggcggcagtggcgggagcggcccctcggccatcctccgtctgcCCAGTTACCGCTTCCGCTACCGCcgccgctc	ssc-miR-935	CCAGTTACCGCTTCCGCTACCGC	3'	Diff	gp2	...(((.(((((((((...((((((.(((((((((((((...((.(((............))).))...))))))))))))).)))))))))))))))...)))...	101	76.6	-64.2	19.2501	11.9252	9.28632	15.615	6.55905	10.2109	3.08198	6.46505	1.73352	4.05713	6.20322	5.42214	middle
45	39	PC-3p-12203_165	TGACCGCGTCCCTCTGCCCAGT	22	6	-	58711670	58711821	ttccggggactgggctgtgtcatggtcacagcgcccctgctcccaggtggcggggccggtgcaggccgtcgtgggctcTGACCGCGTCCCTCTGCCCAGGcacgcagcgaccaagggcgtcctcgtggccatggtctgcaccttcttcgagg	0						3'	New	gp4	...((..((..((((....((((((((((.((((((((((.((..((..(.(((((((((.((((((......))).))))))).))))).)..))..))...)))).......))))))....))))))))))...)).)).))..))...	146	70.4	-74.5	14.0001	9.27515	11.8658	14.7475	6.14911	10.8491	10.4017	8.97923	10.8345	11.1571	14.2674	11.522	middle
279	271	PC-3p-6299_403	CGGCGCCTCGCCTCGGCC	18	6	-	59431361	59431441	gatgctggtgattagccgaggtgcgctggctggaagcaccacctctcggaagcgtgtCGGCGCCTCGTCTCGGCCagcggg	0						3'	New	gp4	..(((((((....((.(((((((((((..(((..((......))..))).)))......)))))))).))..)))))))..	77	67.9	-31.8	61.2503	53.0008	51.5907	62.4599	32.7953	81.6872	29.2789	12.2118	24.2693	9.12855	19.23	13.5553	middle
290	282	PC-3p-32298_43	TGAACGCGGGTCCCTCCCCAGT	22	6	+	59881383	59881456	ggtgggaggcggcccgtggggcgaagccctcggctgcagcggcggcggctcTGAACGCGGGTCCCTCCCCAGGt	0						3'	New	gp4	...((((((.((((((((...(..((((....(((((....)))))))))..)..)))))))))))))).....	66	78.4	-42.4	0	1.32502	3.09544	0	0.819882	2.55272	11.5574	15.0851	14.7349	14.2	16.7487	12.1998	middle
375	367	PC-5p-189043_3	ACGGGGTTCTGTGCTCTGAACGTCC	25	6	-	62977826	62977898	cagtACGGGGTTCTGTGCTCTGAACGTCCtaaattctgcttcacaaggaaaggagctgcagagttctgtgttt	0						5'	New	gp4	...(((((..(((((((((((.....((((...............))))..))))).))))))..)))))...	67	47.9	-25.7	0	3.97506	0	0	0	0	0	0	0	0	0	0	low
377	369	PC-3p-36929_36	TCGCTGTGATGATGGAAGA	19	6	+	64634487	64634577	gccttcacggccgccgcctttttctgttctcgcgcgcctgccagggtcggcCCGCTGTGATGATGGAAGAagaggaaggggccgaggagca	0						3'	New	gp4	(.((((.(((((.((..(((((((..(..(((((((...(((......))).))).))))..)..))))))).....))))))).))))).	90	65.9	-39.8	7.00003	2.65004	3.09544	5.20499	17.2175	1.27636	2.31149	12.9301	0.86676	1.01428	1.24064	2.0333	middle
141	133	PC-5p-84866_10	GCTTGAGAGAACTCGGGTG	19	6	-	67175240	67175363	atagcctccctgtgcctctgcatttGCTTGAGAGAATTCGGGTGgctttatattcccttcgggttatgtcaggtttctcacctgccctcttagaaagcctcacgcttggcaggagggaggcgtg	0						5'	New	gp4	...((((((((.((((...((....(((((((((....((((((((((.((((..((....))..)))).))))....))))))..))))))...))).....))..))))..))))))))...	118	53.2	-50	0	0	0	15.615	0	0	10.7869	0	0	0	0	0	middle
64	56	PC-3p-102894_8	TGGGCCCGGGGAGAGGAGCCT	21	6	-	70515020	70515135	gacccctggctgcagaaccagggactgccctgggctcttctctcgggcctgaggctgagcagggtccTGGGCCCGGGGAGAGGAGCCTaggacgggccttgtcggtacctgggcgc	0						3'	New	gp4	...(((.((.(((.((..(((((.(((.((((((((((((((((((((((..((((......))))..)))))).)))))))))))))))).))).))))))).))))).)))...	110	70.7	-69.1	0	0	2.06363	3.46999	1.63976	1.27636	0.770496	2.15502	3.46704	1.01428	4.34225	0.677767	low
397	389	PC-5p-480708_2	GAGGGGAAACAGGAAGGAA	19	6	-	72211742	72211869	acctggaggatgaatgtttcactgtcacatgtggctcagGAGGGGAAATAGGAAGGAAacaattctggttgaatactgccttttctgcccactgacacacagcacccactgctattcgtgctccataa	0						5'	New	gp4	...(((((.(((((((...((.((.....((((..((((..(((((((.(((.((....((((....))))....)).)))))))).))..))))..)))).....)).)).))))))).)))))...	122	47.7	-38.3	3.50002	0	0	0	0	0	0	0	0	0	0	0	low
34	29	PC-3p-63163_16	TGCGGGCGTTCTGACTGGTCT	21	6	-	76576212	76576297	ggtgaggagctgacccaggcaggacgcttgcgcactagacccctccttgaccgTGCGGGCGTTCTGACTGGTCTgaatccctctgc	0						3'	New	gp4	...((((....((.((((.((((((((..((((...((.......)).....))))..)))))))).))))))......))))...	80	64	-33.4	0.875004	3.31255	0	0	0.819882	0.638181	2.31149	2.15502	1.30014	1.52142	1.86097	0.677767	low
255	247	PC-5p-78881_11	TCCCTGGTCTAGTGGTTAGG	20	6	+	77823342	77823399	gggggtTCCCTGGTCTAGTGGTTGGGactggagttcaattcctgatctgggaactgag	0						5'	New	gp4	...(((((((.((((.((..(((((.((....)))))))..)))))).)))))))...	52	55.2	-22.4	1.75001	2.65004	1.03181	13.88	0	1.27636	0.770496	1.43668	0.86676	0	1.86097	1.35553	middle
491	483	PC-3p-134413_5	TTGGCATGAATGTCGCGCTGG	21	6	-	78201822	78201888	tctgacctgtgtgacattcaaagccaagtcaccacgactgcTTGGCATGAATGTCGCGCTGGttttt	0						3'	New	gp4	...((((.((((((((((((..(((((((..........))))))).)))))))))))).))))...	61	49.3	-32	1.75001	2.65004	4.12725	1.735	1.63976	1.27636	2.31149	0	0	3.04285	1.24064	0	low
319	311	PC-3p-106229_7	ACTGATCTGTACCTGGCCTGCA	22	6	+	82848694	82848784	acggcagaggggctgggcctgggcacagggcagtgggataaggctatctggcccagaactACTGATCTGTACCTGGCCTGCAgattgcaga	0						3'	New	gp4	...((((....((.(((((.(((.((((..((((((.....((((....)))).....))))))..)))).))))))))))...))))...	85	60.4	-39.6	3.50002	0	1.03181	1.735	3.27953	2.55272	0.770496	0.718339	2.60028	2.02857	0.620322	2.0333	low
75	67	PC-5p-243480_3	AATGGATGAATGAGATTC	18	6	-	95765890	95765980	cacaaagagtgAATGGATGAATGAGGTTCttatgccctacagaatactgggccagaccaattcatttttttcccaactgtagctctttaat	0						5'	New	gp4	...((((((((((..(((((((..(((.((...((((...........)))).))))).)))))))..)))..........)))))))...	85	39.6	-22.1	0	0	0	0	0	0	3.85248	0	0	0	0	0	low
327	319	PC-3p-450726_2	TGTAGCACAAATACTAGGAAAGA	23	6	+	96619772	96619879	aatcatttttctctatctacaaattatgtgttaaggaaataacgttTGTAGCACAAATACTAGGAAAGAgttttaaggaaaatgccagaataaagtcagagggacgtc	0						3'	New	gp4	...(((((((((((.(((....(((.(((((((..((.......))..))))))))))....))).)))).......)))))))..........(((.....)))...	81	32.4	-15.5	0	0	0	3.46999	0	0	0.770496	0	0	0	0	0	low
383	375	PC-3p-100948_8	ATCAAGAACATTAGAATCATATATC	25	6	-	96861363	96861442	aagggatagcactgagtattttattgtatttgagcctcggctaccagctttATCAAGAACATTAGAATCATATATCctac	0						3'	New	gp4	..((((((....(((...(((((.(((..((((.....(((.....)))...))))..))).))))))))..))))))..	76	36.2	-16	5.25002	0	1.03181	0	0	1.27636	1.54099	0	0	2.02857	0	0	low
448	440	PC-3p-95971_8	TATATTATGTGTTTGTCAGT	20	6	-	98819024	98819125	aaaaataaatatagaggttactgacaaacatatatgatatgagaacttccatatatgggaacaTATATTATGTGTTTGTCAGTaatctttatatttattaca	0						3'	New	gp4	...(((((((((((((((((((((((((((((((..(((((.....(((((....))))).)))))..)))))))))))))))))))))))))))))))...	96	23.5	-44.9	1.75001	3.97506	1.54772	3.46999	3.68947	3.19091	0.770496	0.718339	3.46704	2.53571	1.24064	0.338884	low
128	120	PC-3p-199810_3	TCACCCTTGCTGTACCCTTCAGT	23	6	-	100833085	100833168	tttggggacaacTGGGGGTAGGGCGAGTGTGAGCtgtctggatcctcatcTCACCCTTGCTGTACCCTTCAGGtgatctcctca	0						3'	New	gp4	...(((((((.(((((((((..(((((.(((((.((..........)).))))).)))))..)))))).))).)).)))))...	78	56	-36.9	1.75001	0	1.03181	3.46999	0.819882	0	0	0	0	0	0	0.677767	low
371	363	PC-3p-101211_8	AGAGTCTGGGGCTTTTGTT	19	6	+	104185995	104186125	ntatggggtagcaggagcaggcaggtagagaaatgttgagaacatggaaccggtgtagctccctcacagagAGAGTCTGGGTCTTTTGTTtcacacatattttctgttccattagttacagatttccagca	0						3'	New	gp4	...(((((((((.(((((((.......((((.(((((((((....(((.((((....((((.(((...))).)))))))).)))....))))).)))).)))))))))))....))))).....))))...	125	45	-34	0	0	0	13.88	0	0	0	0	0	0	0	0	middle
395	387	PC-5p-444406_2	TACAGTGTTAGTCGCTTTT	19	6	-	117777850	117777933	tccttaagagcTACAGTGTTAGTCCCTTTTacccaaggagtttgggaccaaagggcaagactttcccaccctccctcttgattt	0						5'	New	gp4	...(((((((.....(((..((((((((((.((((((...))))))...))))))...))))....))).....)))))))...	78	47.6	-20.8	1.75001	0	0	3.46999	0.819882	1.27636	0	0	0	0	0	0	low
206	198	PC-3p-477267_2	CAGGGTGGGTGGAGGCATT	19	6	-	124896630	124896713	acagatgcatagactcctacctggccagatcccagaaggacttggaactgggtaacacgaggCAGGGTGGGTGGATGCATTcaa	0						3'	New	gp4	...(((((((.....((((((..(((....(((((............)))))........)))..))))))...)))))))...	78	53.6	-29.5	0	0	0	3.46999	0	0	0	0	0	0	0	0	low
189	181	PC-5p-295893_2	CTCTGGATTGGCTTTGAGGA	20	6	-	128546502	128546581	gCTCTGGTTTGGCTTTGAGGAtgatcagcagggagctatccagagtactgaactgtctccctcaaaagctctgccaggtt	0						5'	New	gp4	..((((((..((((((((((..((.(((((((((....)))......)))..)))))..))))))).)))..))))))..	76	51.2	-28.6	0	0	0	5.20499	0	0	0	0	0	0	0	0	low
51	68	ssc-miR-186_R-1	CAAAGAATTCTCCTTTTGGGCT	22	6	+	131558964	131559053	attgcttataactttcCAAAGAATTCTCCTTTTGGGCTttatgattttattttaaGCCCAAAGGTGAATTTTTTGGgaagtttgggctaa	11	ssc-mir-186,bta-mir-186,eca-mir-186,cfa-mir-186,hsa-mir-186,mml-mir-186,cgr-mir-186,mmu-mir-186,rno-mir-186,mdo-mir-186,oan-mir-186,	ssc-mir-186	tgcttataactttcCAAAGAATTCTCCTTTTGGGCTTtatgattttattttaagcccaaaggtgaattttttgggaagtttg	ssc-miR-186	CAAAGAATTCTCCTTTTGGGCTT	5'	Diff	gp2	...((..(.(((((((((((((((((.(((((.((((((..............))))))))))).))))))))))))))))))..))...	84	32.2	-39.9	40579.2	49008.6	48955.9	29583.4	63378.9	37255.7	73761.9	90673	91788.6	127524	89741.7	74855	high
51	69	hsa-miR-186-3p_R-1	GCCCAAAGGTGAATTTTTTGG	21	6	+	131558964	131559053	attgcttataactttcCAAAGAATTCTCCTTTTGGGCTttatgattttattttaaGCCCAAAGGTGAATTTTTTGGgaagtttgggctaa	11	ssc-mir-186,bta-mir-186,eca-mir-186,cfa-mir-186,hsa-mir-186,mml-mir-186,cgr-mir-186,mmu-mir-186,rno-mir-186,mdo-mir-186,oan-mir-186,	hsa-mir-186	tgcttgtaactttcCAAAGAATTCTCCTTTTGGGCTttctggttttattttaaGCCCAAAGGTGAATTTTTTGGGaagtttgagct	hsa-miR-186-3p	GCCCAAAGGTGAATTTTTTGGG	3'	Diff	gp2	...((..(.(((((((((((((((((.(((((.((((((..............))))))))))).))))))))))))))))))..))...	84	32.2	-39.9	5.25002	9.27515	8.2545	5.20499	14.7579	6.38181	9.24595	7.90173	8.6676	3.04285	11.1658	14.2331	middle
26	34	hsa-miR-101-5p_L+1R-2	TCAGTTATCACAGTGCTGATG	21	6	+	135736108	135736198	actgacaggctgccctggcTCAGTTATCACAGTGCTGATGctgtccattctaaaggTACAGTACTGTGATAACTGAAGgatggcagccatc	19	ssc-mir-101-1,ssc-mir-101-2,bta-mir-101-1,bta-mir-101-2,eca-mir-101-2,eca-mir-101-1,cfa-mir-101-1,cfa-mir-101-2,hsa-mir-101-1,ppa-mir-101,ptr-mir-101-2,cgr-mir-101b,mmu-mir-101c,mmu-mir-101b,rno-mir-101b,mdo-mir-101-2,mdo-mir-101-1,sha-mir-101,oan-mir-101-2,	hsa-mir-101-1	tgccctggctCAGTTATCACAGTGCTGATGCTgtctattctaaaggTACAGTACTGTGATAACTGAAggatggca	hsa-miR-101-5p	CAGTTATCACAGTGCTGATGCT	5'	Diff	gp2	.......(((((((.....((((((((((((((((((.((((............)))))))))))))))))))))).....)))))))...	81	49.5	-47.1	126.876	108.652	85.6405	106.702	90.5969	98.2799	106.328	98.7716	73.2412	78.0998	87.1553	137.248	middle
26	35	ssc-miR-101_R+1	TACAGTACTGTGATAACTGAAT	22	6	+	135736108	135736198	actgacaggctgccctggcTCAGTTATCACAGTGCTGATGctgtccattctaaaggTACAGTACTGTGATAACTGAAGgatggcagccatc	19	ssc-mir-101-1,ssc-mir-101-2,bta-mir-101-1,bta-mir-101-2,eca-mir-101-2,eca-mir-101-1,cfa-mir-101-1,cfa-mir-101-2,hsa-mir-101-1,ppa-mir-101,ptr-mir-101-2,cgr-mir-101b,mmu-mir-101c,mmu-mir-101b,rno-mir-101b,mdo-mir-101-2,mdo-mir-101-1,sha-mir-101,oan-mir-101-2,	ssc-mir-101-2	ggctgccctggctcagttatcacagtgctgatgctgtccattctaaaggTACAGTACTGTGATAACTGAAggatggcagcc	ssc-miR-101	TACAGTACTGTGATAACTGAA	3'	Diff	gp2	.......(((((((.....((((((((((((((((((.((((............)))))))))))))))))))))).....)))))))...	81	49.5	-47.1	60791.8	59431.2	41367.4	50183.1	46345.4	46801.7	45346	42118.4	37626.9	37842.9	36622.6	49183.5	high
214	206	PC-5p-1153846_1	GAGGAGGGCACTGAAGACTGGA	22	6	+	135868032	135868091	GGGGAGGGCACTGAAGACTGGAcctggatgacaaggatcttcttaaatagtgttgtcagg	0						5'	New	gp4	...((..((((((((((..((((((........))).)))))))...))))))..))...	54	50	-15.2	0	0	0	5.20499	0	0	0	0	0.86676	0	0	0	low
411	403	PC-3p-171093_4	CAGATGACAATGAAACACT	19	6	+	137326470	137326591	tactttgaagtcttatctttagtccttcacgttggcatgtggtaatgtccatttctcccgtgccaagctggactggttacCAGATGACCATGAAACACTttaccgaagaagttgaaatgacc	0						3'	New	gp4	...((..(..((((......(((..((((...((((((.((((((((((((.................)))))..))))))).))).)))))))..)))......))))..)..))......	113	43.4	-29.7	3.50002	0	0	0	0	2.55272	1.54099	0	0	0	0	0.677767	low
391	383	PC-3p-397470_2	GGTTAATAGGATGGAAATACT	21	6	+	142099009	142099095	gactgcagaagagtccaattcatcttgttctgcttgggattttaaataGGTTAATAGGATGGAAATACAaggcacatttttgcattc	0						3'	New	gp4	((.(((((((..((((..(((((((((((..(((((..........))))).))))))))))).......)).))..))))))).))	87	36.8	-20.2	3.50002	0	0	0	0	0	0	0	0	0	0	0	low
341	333	PC-3p-473117_2	TCCGGCCCCTGGTGCTCTGC	20	6	+	152312763	152312852	cgaggttccgcgcgcacaaggttccggggccggggaaaggcgcctcccgcccgcgccccacTCCGGCCCCTGGTGCTCTGCggctccagc	0						3'	New	gp4	...((..(((((.((((.(((..((((((..((((...((((.....))))....)))).))))))..))).))))..)))))..))...	84	77.8	-47.9	0	0	0	3.46999	0	0	0	0	0	0	0	0	low
399	391	PC-3p-154023_4	AATCCACTGTCTAGCCTCTGTG	22	6	-	156177794	156177876	aactcacagaatttagacttggaaggggggtgggaggctgccactaaccgtgacatgAATCCACTGTCTAGCCTCTGTGagca	0						3'	New	gp4	..((((((((..((((((.((((.((..(((((.......)))))..))..........))))..))))))..))))))))..	79	51.8	-31.6	1.75001	3.97506	0	0	0.819882	0	0.770496	0	0	0	0.620322	0	low
311	303	PC-3p-167481_4	AGTTTTAGAATCTTGGGTCT	20	6	-	157474547	157474612	cccggaggtccaagtttctcaggctagatgtcagcagtcttAGTTTTAGAATCTTGGGTCTtcagt	0						3'	New	gp4	...((((..(((((.((((.(..((((((.......))).)))..).)))).)))))..))))...	60	47	-24.7	0	0	5.15907	5.20499	0	0	0	0.718339	0	0	0	0	low
22	28	mmu-miR-30f_L+1R-1_1ss17AG	TGTAAACATCCGACTGGAAGCT	22	6	+	157476657	157476734	cctgccgcTGTAAACATCCGACTGAAAGCTcctgggaacgcctcacagcttccagtcaaggatgtttacagtggcaaa	1	mmu-mir-30f,	mmu-mir-30f	tggcagcctgccgctGTAAACATCCGACTGAAAGCTCctctcaacaccttacagcttccagtcaaggatgtttacagtagcaaagactgccc	mmu-miR-30f	GTAAACATCCGACTGAAAGCTC	5'	Diff	gp2	..((((((((((((((((((((((.(((((...(((....)))...))))).)))))..)))))))))))))))))..	74	52.6	-44.9	0	2.65004	2.06363	5.20499	2.45964	0	3.08198	0	0	1.01428	1.86097	2.0333	low
205	197	PC-3p-387675_2	TCTCGGAATTCCACGGGGCTGA	22	7	-	1245637	1245728	tgcgtgttctcgccaggccagccctgcggttttctgagagctgctgttacactggtggTCTCGGAATTCCACGGGGCTGAcgggaacgctgc	0						3'	New	gp4	.(((((((((((......((((((((.((..((((((((.(..((........))..)))))))))..)).)))))))).))))))))).))	91	62	-47.8	0	0	0	0	0	0	0	0	0	3.04285	0	0	low
136	128	PC-5p-142378_5	GTCCAGGTGGAAGGATGT	18	7	+	1596530	1596629	gaggaacagtaagaatgctagttGTCCAGGTGGAAGAATGTttgggtttaaggtatgcgcactctttcctggacctctagggtagattttatggttttaa	0						5'	New	gp4	...((((..(((((.((((((..(((((((..(((((.(((....(.......)....))).))))))))))))..))..))))..)))))..))))...	94	42	-25.7	0	0	0	10.41	0	0	0	0	0	0	0	0	middle
96	88	PC-3p-1668424_1	CCAGTGGAACCTCCGCTTCT	20	7	-	3218661	3218766	gctgctgagaggccgagtgccctctggggccccactcgccgttggaggccagtgagccccggtgatgtgtgcctttgccCCAGTGGAACCTCCGCTTCTcagtggg	0						3'	New	gp4	.(..(((((((((.(((...((.(((((((..((((((((...((.(((......)))))))))).))).......))))))).))...))).)))))))))..).	104	67.9	-55.4	0	0	0	3.46999	0	0	0	0	0	0	0	0	low
123	150	ssc-mir-9841-p5	GTGGGTGCTCGATGCTAGATG	21	7	+	4037087	4037204	atcgttagaaagttcgccagttagtagGCGGGTGCTCGATGCTAGATGttatttattaccattgtctgtgcccaTCTAGCATCGAGCACCCACCcacttcctgcaaattccttgccaa	1	ssc-mir-9841,	ssc-mir-9841	caggaagtgggtgggtgctcgatgctagatgggcacagacaatggtaataaataacaTCTAGCATCGAGCACCCGCCTactaactggc	ssc-mir-9841-p5	gtgggtgctcgatgctagatg	5'	New	gp2	...(..((..((((.(.(((..(((.((.(((((((((((((((((((.(((..((.......))..)))..))))))))))))))))))).)).)))..)))).)))).))..)...	112	47.5	-48.1	82.2504	95.4015	98.0222	107.57	76.249	54.8836	82.4431	66.8055	92.7433	92.2998	62.0322	88.1097	middle
123	151	ssc-miR-9841-3p_R-1	TCTAGCATCGAGCACCCGCC	20	7	+	4037087	4037204	atcgttagaaagttcgccagttagtagGCGGGTGCTCGATGCTAGATGttatttattaccattgtctgtgcccaTCTAGCATCGAGCACCCACCcacttcctgcaaattccttgccaa	1	ssc-mir-9841,	ssc-mir-9841	caggaagtgggtgggtgctcgatgctagatgggcacagacaatggtaataaataacaTCTAGCATCGAGCACCCGCCTactaactggc	ssc-miR-9841-3p	TCTAGCATCGAGCACCCGCCT	3'	Diff	gp2	...(..((..((((.(.(((..(((.((.(((((((((((((((((((.(((..((.......))..)))..))))))))))))))))))).)).)))..)))).)))).))..)...	112	47.5	-48.1	533.752	571.084	948.236	988.948	546.041	441.621	1058.66	691.042	823.422	1041.67	841.777	1008.52	middle
118	144	ssc-miR-7136-5p	TCTGGTCCAGACACTGTGGAGC	22	7	+	8701420	8701515	tgagtcctgagacatcgctTCTGGTCCAGACACTGTGGAGCtgaagagaccaacactTCTCAGTGTTTGAACCAGAAGctctgtctgcagaacaat	1	ssc-mir-7136,	ssc-mir-7136	TCTGGTCCAGACACTGTGGAGCtgaagagaccaacactTCTCAGTGTTTGAACCAGAAGC	ssc-miR-7136-5p	TCTGGTCCAGACACTGTGGAGC	5'	Yes	gp2	...((.((((((((..(((((((((.(((((((((.((((.((..........)))))).))))))))).)))))))))..))))).))).))...	90	49	-45	24.5001	16.5628	0.515907	0	0.409941	0	0	0	0	0	0	0	middle
118	145	ssc-miR-7136-3p_R-1	TCTCAGTGTTTGAACCAGAAG	21	7	+	8701420	8701515	tgagtcctgagacatcgctTCTGGTCCAGACACTGTGGAGCtgaagagaccaacactTCTCAGTGTTTGAACCAGAAGctctgtctgcagaacaat	1	ssc-mir-7136,	ssc-mir-7136	TCTGGTCCAGACACTGTGGAGCtgaagagaccaacactTCTCAGTGTTTGAACCAGAAGC	ssc-miR-7136-3p	TCTCAGTGTTTGAACCAGAAGC	3'	Diff	gp2	...((.((((((((..(((((((((.(((((((((.((((.((..........)))))).))))))))).)))))))))..))))).))).))...	90	49	-45	7.00003	3.97506	0	0	0.409941	0.638181	0	0	0	0	0	0	low
116	108	PC-5p-420468_2	TTTGCGGCTGTCTGATCA	18	7	-	15354675	15354825	ccagaaagcatttttcttcacattatataagcaattctctcagccctactaatTTTGCGGCTGTCTGATAAattctggggatacttatcagataaccctctaagaatttgtgcggggaccaagacagattcctaataagaatgcattcaag	0						5'	New	gp4	...(((.(((((((...........(((.((.((((.(((...((((((.((((((..((.((((((((((..((....))...)))))))))).)).....)))))).))..))))....)))..)))).)).)))))))))).)))...	145	38.4	-30.8	0	0	0	3.46999	0	0	0.770496	0	0	0	0	0	low
289	281	PC-3p-127234_5	AAAAGATTGGATCAAGTT	18	7	-	17068843	17068924	ctagtcaactctctaggctttttgttttaccattaagtaaaaagttgatgaaacatcaAAAAGATTGGATGAAGTTaacaac	0						3'	New	gp4	...((.(((((((((..(((((((......((((((........))))))......)))))))..)))).)).))).))...	76	30.5	-15.5	0	0	0	0	1.63976	5.10545	2.31149	0	1.73352	0	0	0	low
406	398	PC-5p-344646_2	TGGCTGGGAGGTGCCTCCGC	20	7	+	22893104	22893196	tcTGGCTGGGAGGTGCCTCCGCggttggaacctggcgcggtgtctctgcccagcgctcagaggtcgcctagccgtgggcacagcctagtccct	0						5'	New	gp4	...(((((((..((((..((((((((((.(((((((((((.((....)))).)))))...))))...))))))))))))))..)))))))...	87	68.8	-47.6	0	0	0	3.46999	0	0	0	0	0	0	0	0	low
48	42	PC-3p-149013_4	CCGCCTCCCGGGTCCGGACCGGC	23	7	+	25051012	25051083	ctgagccGGGTCGGAGCCCGGGAGGCGGCCCggagggaggccgggCCGCCTCCCGGGTCCGGACCGGCactg	0						3'	New	gp4	....(((((..((((.(((((((((((((((((.......)))))))))))))))))))))..)))))....	64	83.3	-65.7	0	0	0.515907	0	0	0	1.54099	1.79585	2.60028	3.04285	0.930483	0	low
403	395	PC-3p-135272_5	CCTGCTCCCACCCCAACCCTAGA	23	7	+	27282367	27282457	agggggtccagcagttggtgggtggggtgggtctccagggtgccccactgatggctacCCTGCTCCCACCCCAACCCTAGCaagacccaag	0						3'	New	gp4	...(((((.....(((((.((.(((((((((....(((((((((........))).))))))..))))))))).)))))))..)))))...	85	65.9	-50.9	0	2.65004	0	0	0	2.55272	0	0	0.86676	0	0	3.38884	low
153	145	PC-5p-1369271_1	TGAGTGGCGCGGGCTGGGGGATG	23	7	-	27566978	27567107	tgagcagcggaggatgtggggtgggagcaaaacttgtaaTGAGTGGCGCGGGCTGGGGGATGtgggccaccaccacggctccttgactctgccattcctaataagacctggttccacatctcactcccgg	0						5'	New	gp4	.......((..(((.(((((((((((((....(((((...((((((((.(((..(((((..((((.......))))..)))))...)))))))))))...))))).....))))).))))))))))))).	122	59.2	-53.8	0	0	0	3.46999	0	0	0	0	0	0	0.620322	0	low
71	92	ssc-miR-219a	AGAGTTGAGTCTGGACGTCCCG	22	7	-	29752722	29752843	tccctcccccgccccgggccgcggctctTGATTGTCCAAACGCAATTCTCGAgtctatagctctggccgAGAGTTGAGTCTGGACGTCCCGagccgtcgcccccaaacctcgaggggagagc	20	ssc-mir-219a,ssc-mir-219b,bta-mir-219-2,bta-mir-219-1,eca-mir-219-1,eca-mir-219-2,cfa-mir-219-1,cfa-mir-219-2,hsa-mir-219a-1,ptr-mir-219-1,ptr-mir-219-2,ppy-mir-219-1,mml-mir-219-1,mmu-mir-219a-1,mmu-mir-219a-2,rno-mir-219a-1,rno-mir-219a-2,mdo-mir-219-2,mdo-mir-219-1,oan-mir-219,	ssc-mir-219a	ccgcggctcttgattgtccaaacgcaattctcgagtctatagctctggccgAGAGTTGAGTCTGGACGTCCCGagccgtcgcc	ssc-miR-219a	AGAGTTGAGTCTGGACGTCCCG	3'	Yes	gp2	...((((((((....((((..((((((..((.((((((.((.(((((((((.(((.........)))))))))))).)).))))))))..))))))..))))........)).))))))...	116	64.8	-61	10.5	2.65004	5.15907	8.67499	7.37893	3.82909	9.24595	12.2118	9.53436	7.09998	9.92515	6.0999	middle
154	146	PC-5p-22420_72	TGTCATGCTGGGGAGTGTAGTGA	23	7	+	37088394	37088494	tcatcggagtgacgcagatcTGTCATGCTGGGGAGTGTAGTGAacgtcgtcatgcttctcactgctccccccggtgtccggctctgtgtcgctgctgaagc	0						5'	New	gp4	...(((((((((((((((.(((..(..((((((...(((((((..((......))...)))))))...))))))..).))).))))))))))).))))...	95	59.4	-47.6	8.75004	13.2502	12.3818	29.495	9.83858	6.38181	13.8689	12.9301	6.06732	16.2285	16.7487	14.2331	middle
80	72	PC-5p-90401_9	AGGACTGGGGAGCTTGCAAGG	21	7	-	41158318	41158413	gcaggtcggggtcgtgctgggAGGACTGGGGAGCTTGCAAGGgcctgcactcagagcccgcagcctccgcagaccacgccagctgcccgggccctt	0						5'	New	gp4	...((((.(((.((.(((((..((.(((.((((..(((..(((((((....))).)))))))..)))).))).))...)))))))))).))))...	90	71.9	-50.3	3.50002	0	0	1.735	9.0187	3.82909	2.31149	0.718339	0.86676	8.11426	2.48129	2.71107	low
245	237	PC-3p-65199_15	TTCCAAGGGTGACCTCTGAAT	21	7	-	41673469	41673538	ttttgtatTTTCAGAGGTCACCCTTGGAACTcttactacagTTCCAAGGGTGACCTCTGAAAatacactc	0						3'	New	gp4	...((((((((((((((((((((((((((((........))))))))))))))))))))))))))))...	64	41.4	-50	3.50002	1.98753	3.09544	0.867499	1.63976	1.91454	2.69674	2.15502	1.73352	3.54999	0	0.338884	low
41	34	PC-3p-90191_9	CTGCCCTCTTGTCTGTGTCCCT	22	7	+	43938414	43938476	caGAGGGGCACACACATGAGCAGTggttccactttgcaCTGCCCTCTTGTCTGTGTCCCTagc	0						3'	New	gp4	...(((((((((.(((.((((((((...........))))))..)).))).)))))))))...	57	57.1	-27	3.50002	1.98753	1.54772	0.867499	4.09941	1.91454	2.31149	2.15502	0.43338	2.53571	0.620322	3.04995	low
271	263	PC-3p-130693_5	AGGCCCTCGGATCGGCCCC	19	7	-	48658999	48659133	cctactggttgagaccaagctaaaggcaaattctctaggttgaatgggctcctgtggtcccaagtcataacatctttcAGGCCCTCGGATTGGCCCCatttctttgaattgccggaccttcgtctcttcagttct	0						3'	New	gp4	...(((((..(((((.(((.....(((.(((((...(((......(((((.(((.((.((.(((.........)))...)).)).)))...)))))....)))..))))))))....))).))))).)))))...	129	48.9	-37.3	0	2.65004	1.03181	0	0.819882	5.10545	1.54099	1.43668	0	0	1.24064	0	low
382	374	PC-5p-97261_8	GAGACAGGACTGCAAAGTA	19	7	+	50604463	50604573	ttaggtaaggaaatgccagaggtGAGACAGGACTACAAAGTAgtttaatccagaggataaaatactaattagagattttggggtccctaccaaggttttcaaaataccagt	0						5'	New	gp4	...((((..((((.(((...(((.((...((((..((((((.((((.((((...)))).)))).((....))..))))))..)))))))))..)))))))....))))...	105	37.8	-24.6	0	0	0	0	3.27953	0	1.54099	0	0	0	1.24064	0	low
64	84	ssc-miR-206_L-3	AATGTAAGGAAGTGTGTGA	19	7	+	52426446	52426523	tcccgaggccacatgcttctttatatccccatacggattacttgactatggAATGTAAGGAAGTGTGTGAtctcgtta	12	ssc-mir-206,bta-mir-206,eca-mir-206-2,cfa-mir-206,hsa-mir-206,ptr-mir-206,ggo-mir-206,cgr-mir-206,mmu-mir-206,rno-mir-206,mdo-mir-206,oan-mir-206,	ssc-mir-206	ttcccgaggccacatgcttctttatatccccatacggattacttgactaTGGAATGTAAGGAAGTGTGTGAtctcgttaa	ssc-miR-206	TGGAATGTAAGGAAGTGTGTGA	3'	Diff	gp2	...((((..((((..(((((((((((..(((((.............))))).)))))))))))..))))..))))...	72	43.6	-31.9	0	0	0	38.1699	0	2.55272	3.08198	0	0	0	0	0	middle
5	6	PC-5p-141879_5	ACAGTTTTGGATTGTTTCTGTT	22	7	+	52636810	52636886	ttatACAGTTTTGGATTGTTTCTGTTggtgagagctccctttaccgtcattAACGGAAACAATCCAAAACTGTaaaa	0						5'	New	gp4	...(((((((((((((((((((((((..((((((....))).....)))..)))))))))))))))))))))))...	71	36.4	-37	0.875004	0.66251	2.57953	1.735	0.409941	3.82909	0	0.359169	3.90042	0	1.24064	0	low
5	7	PC-3p-75961_12	AACGGAAACAATCCAAAACTGT	22	7	+	52636810	52636886	ttatACAGTTTTGGATTGTTTCTGTTggtgagagctccctttaccgtcattAACGGAAACAATCCAAAACTGTaaaa	0						3'	New	gp4	...(((((((((((((((((((((((..((((((....))).....)))..)))))))))))))))))))))))...	71	36.4	-37	1.75001	0	1.54772	0.867499	1.22982	0.638181	0.385248	3.59169	0.86676	0.507142	0.310161	0	low
49	67	ssc-miR-184	TGGACGGAGAACTGATAAGGGT	22	7	+	53883624	53883710	ggccagtcacatccccttatcacttttccagccagctttgtgactctaaatgtTGGACGGAGAACTGATAAGGGTaggtgattgaca	10	ssc-mir-184,bta-mir-184,eca-mir-184,cfa-mir-184,hsa-mir-184,mml-mir-184,cgr-mir-184,mmu-mir-184,rno-mir-184,mdo-mir-184,	ssc-mir-184	ccagtcacatccccttatcacttttccagccagctttgtgactctaaatgtTGGACGGAGAACTGATAAGGGTaggtgattga	ssc-miR-184	TGGACGGAGAACTGATAAGGGT	3'	Yes	gp2	...(((((((...(((((((((.((((((..(((((((((......)))).)))))..)))))).)))))))))...)))))))...	81	47.1	-38.7	10.5	12.5877	2.57953	6.93999	6.55905	11.4873	7.70496	2.87336	9.10098	8.62141	1.86097	12.5387	middle
386	378	PC-3p-19380_88	TAAGAGCATCTGAACCAGGGGT	22	7	+	55687357	55687462	taggatgcaatggagttctggtcctctggttctgtgaccctgcctatttgcccttcagccaggTAAGAGCATCTGAACCAGGGGTtcagcacttctgctcatctcc	0						3'	New	gp4	..(((((....(((((.(((..((((((((((.(((....(((((..(((.....)))..)))))....)))..))))))))))..))).)))))....)))))..	102	52.8	-40.4	29.7501	22.5254	22.6999	15.615	38.5344	22.9745	23.1149	18.6768	27.7363	30.4285	21.091	21.6885	middle
175	167	PC-5p-43266_29	CCACGCCCGGGGCACCCCC	19	7	+	58719673	58719752	tcccctggCCACGCCCGGGGCAGCCCCatgctcacggcatcccagcctgggcctgcgtgtgctgcctcctgtgcaggaaa	0						5'	New	gp4	...((((..((((...((((((((..((.(((((.(((......)))))))).)).....)))))))).))))))))...	74	71.2	-33.9	3.50002	3.97506	1.03181	3.46999	2.45964	5.10545	0.770496	2.15502	1.73352	1.01428	2.48129	2.71107	low
73	65	PC-3p-38849_33	GTTCTCTGAGGTCTGCTCT	19	7	-	60164718	60164798	tggggtgtgagggtcactagacaggggaatggtgggctttctcaaGTTCTCTGGGGTCTGCTCTctggccctgataccgat	0						3'	New	gp4	...(((((.(((((((.(((((.(((((((..((((....)))).)))))))...))))).....))))))).)))))...	75	56.8	-32.8	5.25002	11.9252	9.28632	10.41	4.09941	5.10545	0	0	0	0	2.48129	3.38884	middle
257	249	PC-3p-150894_4	AGAACTTTGAAGACTGAAG	19	7	-	61632562	61632699	tttgaaaagtgacaatgttttcctgaagtgttaggccagaattagttttgtatattttttatatttattttaAGAACTTTGAAGACTAAAGaaaatatttttggctatatcatgtaaacattcttgtctcttgtccat	0						3'	New	gp4	...((.(((.((((((((((...(((..(((..((((((((((((((((.((...((((((.........))))))...)))))))))).........))))))))))))))...))))))...)))).))).))...	132	26.1	-23.8	0	0	0	0	0	0	3.08198	0	0	0	0	0	low
262	254	PC-3p-114492_6	TCCTTCCCTCTCACTGCCTCC	21	7	+	61842587	61842668	nnccaggcctgggatgcactcagaggggagctgggaactgcatcttccccTCCTTCCCTCTCACTGCCTCCcagacctgtac	0						3'	New	gp4	...((((.((((((.(((...(((((((((..(((((.......)))))...)))))))))...))).)))))).))))...	76	61	-42.3	5.25002	1.32502	1.03181	1.735	0.819882	0	1.54099	0	0	0	0.620322	0	low
191	183	PC-5p-45948_26	TGCTGTAATTTACTCTCACCAG	22	7	-	64052413	64052515	ggcccctgagaaatccTGCTGTAATTTACTCTCACCAGtcagagtggtgatttcttactgtcattgctggTGAGAGTAGATTACAGTAGTATttctagggaag	0						5'	New	gp4	...((((.((((((.((((((((((((((((((((((((....(..((((....))))..)....)))))))))))))))))))))))).))))))))))...	97	43.7	-56.6	7.00003	14.5752	6.19088	1.735	7.37893	2.55272	4.62298	3.59169	3.46704	5.07142	3.10161	9.48874	middle
254	246	PC-3p-33565_41	TGCATCTGGAGGTCACTGACAGT	23	7	+	64448878	64448958	gctgtcagagcttgggtgccctttctagagtcatggtcagttacagcaTGCATCTGGAGGTCACTGACAGTctctgaccag	0						3'	New	gp4	...(((((((((..((((.((..((((((..((((...........))))..)))))))).))))...)).)))))))...	75	53.1	-26.5	5.25002	3.97506	6.19088	1.735	2.45964	0	6.16397	5.74671	9.53436	12.1714	4.34225	2.71107	middle
11	12	PC-5p-46909_25	AGTCTTGATTCTCTGTTTTGTT	22	7	+	67901048	67901160	cagcagactgaattttaggccctcAGTCTTGATTCTCTGTTTTGTTggtttgacttctgaagtattgccCAAAACAGAGAATCAAGACTGAgggcctaaaattaggaatggaa	0						5'	New	gp4	...((..(..((((((((((((((((((((((((((((((((((..(((...((((...))))...)))))))))))))))))))))))))))))))))))))..)..))...	107	40.7	-65.2	1.75001	2.65004	5.15907	0	4.91929	6.38181	2.69674	2.15502	3.03366	2.53571	1.24064	5.42214	low
11	13	PC-3p-7368_326	CAAAACAGAGAATCAAGACTGA	22	7	+	67901048	67901160	cagcagactgaattttaggccctcAGTCTTGATTCTCTGTTTTGTTggtttgacttctgaagtattgccCAAAACAGAGAATCAAGACTGAgggcctaaaattaggaatggaa	0						3'	New	gp4	...((..(..((((((((((((((((((((((((((((((((((..(((...((((...))))...)))))))))))))))))))))))))))))))))))))..)..))...	107	40.7	-65.2	16.6251	13.2502	21.6681	10.41	18.8573	16.5927	4.62298	33.4028	15.6017	8.11426	11.7861	13.8942	middle
111	103	PC-3p-101208_8	ATAACCCGGGCCAAAAGCTCGCT	23	7	+	81043843	81043929	agctcctctgaccaacaagctttttgctcgtcttatacgtgagcatcaggtATAACCCGGGCCAAAAGCTCGCCcgtcacaggaagt	0						3'	New	gp4	.((((((.((((.....(((((((.(((((..((((((.((.....)).))))))..))))).))))))).....)))).)))).))	86	51.7	-34.6	1.75001	0	0	1.735	0.819882	0	3.08198	0	1.73352	3.04285	0	0	low
65	85	ssc-miR-208b	ATAAGACGAACAAAAGGTTTGT	22	7	-	81071285	81071373	accttctcctctcagggAAGCTTTTTGCTCGCGTTATGtttctcatccgaatATAAGACGAACAAAAGGTTTGTctgagggcagagtgc	8	ssc-mir-208b,bta-mir-208b,cfa-mir-208b,hsa-mir-208b,ptr-mir-208b,mmu-mir-208b,rno-mir-208b,mdo-mir-208b,	ssc-mir-208b	ctctcagggaagctttttgctcgcgttatgtttctcatccgaatATAAGACGAACAAAAGGTTTGTctgagggcagagtg	ssc-miR-208b	ATAAGACGAACAAAAGGTTTGT	3'	Yes	gp2	...((((.(((((((..((((((((((.(((..((((((((.......))))))))..))).))))))))))..))))))).))))...	83	46.1	-33	12.2501	15.9003	23.7317	239.43	22.1368	21.6982	27.7379	20.8318	25.136	25.3571	21.7113	21.0108	middle
27	24	PC-5p-33500_41	TGATGCCTGGCATTTTGTGTGT	22	7	+	97192087	97192187	ctgtccctccagaagcccTGATGCCTGGCATTTTGTGTGTatggagaaagaaacacacaacacaCACAAAATGCCAGGCATCAGGGCttctggaggggtta	0						5'	New	gp4	...(((((((((((((((((((((((((((((((((((((.((..............))..)))))))))))))))))))))))))))))))))))))...	95	50.5	-75.7	5.25002	3.31255	1.54772	4.33749	4.50935	0.638181	3.08198	1.79585	1.73352	1.52142	1.86097	2.71107	low
393	385	PC-5p-41097_31	TTCCCGGCCAACGCACCAC	19	7	-	97748785	97748850	gcTTCCCGGCCAATGCACCACaaatgttgcagaaaccgcaaaaaccgtggcaatggaaggagacaa	0						5'	New	gp4	...((((..(((.(((..(((.....((((.......)))).....)))))).)))..)).))...	60	51.5	-16.5	0	3.97506	7.22269	8.67499	4.09941	0	3.85248	3.59169	1.73352	3.04285	1.86097	3.38884	low
441	433	PC-5p-69373_14	GAGAGATCAGAGGCGCAGAAA	21	7	-	99628437	99628524	gctggGAGAGATCAGAGGAGCAGAAAaactgttcccggggttccgccctcccaggtgggctgtgctctggtccttgacatcttcctgt	0						5'	New	gp4	((.((((((..(((.((((.((((...((.(..(((((((........)))).)).)..).))..)))).)))))))..)))))).))	88	59.1	-38	1.75001	0	0	5.20499	1.63976	0	0.770496	1.43668	1.73352	1.01428	3.10161	1.35553	low
116	142	bta-miR-6529a_R-2	GAGAGATCAGAGGCGCAGA	19	7	-	99628439	99628526	gctggGAGAGATCAGAGGAGCAGAaaaactgttcccggggttccgccctcccaggtgggctgtgctctggtccttgacatcttcctgt	4	bta-mir-6529a,eca-mir-6529,cfa-mir-6529,mml-mir-6529,	bta-mir-6529a	ctgttctcttGAGAGATCAGAGGCGCAGAGTgcgtcaatgtcaatgaagcctgtgccttttacctctttaagagcgcac	bta-miR-6529a	GAGAGATCAGAGGCGCAGAGT	5'	Diff	gp2	((.((((((..(((.((((.((((...((.(..(((((((........)))).)).)..).))..)))).)))))))..)))))).))	88	59.1	-38	15.7501	14.5752	22.6999	13.88	12.2982	12.7636	20.8034	17.9585	14.7349	30.4285	21.091	6.0999	middle
461	453	PC-5p-127120_5	CTGTGCCCTCTGCTTCCCAGT	21	7	-	128851910	128851982	ggctcctgagcCTGTGCCCTCTGCTTCCCAGGcacagtgagctggaggaggccgtgggcacagtcaaggacaa	0						5'	New	gp4	...((((....((((((((...((((((..(((.......)))...))))))...))))))))...))))...	67	64.4	-33.9	0	0	1.03181	1.735	1.63976	0	0	0	3.46704	0	0	0	low
19	17	PC-5p-63460_16	AAAGCGGAGAGAGAGGCT	18	7	+	130186468	130186537	cAAAGCGGAGAGAGAGGCTggccttgggcggcccacagccccaagttcaaatcccctctctgctgctccc	0						5'	New	gp4	...(((((((((((.((.((..(((((((........).))))))..))...)).)))))).)))))...	64	64.3	-30	0.875004	1.98753	1.03181	3.46999	0.409941	0	0	0.359169	0.86676	3.04285	1.86097	0	low
104	96	PC-5p-10840_194	CAGCAATTTATTTTCCAGTGAT	22	8	-	8772842	8772924	acaactcacatgtCAGCAATTTATTTTCCAGTGATtgtggaatgaattaTCACTGGAAAGTTTATTGTTAACctgtgagtcat	0						5'	New	gp4	...(((((((.((.((((((..(((((((((((((..(.......)..)))))))))))))..)))))).)).)))))))...	77	33.7	-34.5	1.75001	3.97506	18.5726	13.88	19.6772	10.2109	19.2624	12.9301	20.8022	21.2999	19.23	23.0441	middle
437	429	PC-3p-365958_2	AACAACGGATGACAAGCTT	19	8	+	33471598	33471685	agtccttctttcccattacgctgtcatctaaattgctgctagttcacagagattaAACAATGGATGACAAGCTTataaaagggggtta	0						3'	New	gp4	...((..((((.....((.((((((((((((((..(((........)))..)))......))))))))).)).))..))))..))...	82	38.6	-21.5	0	0	0	8.67499	0	0	0	0	0	0	0	0	low
321	313	PC-5p-78938_11	TTTATTAACTGTTTGTTCTTTTAG	24	8	+	40872900	40873023	ttttggatttattcttttatcatcaTTTATTAACTGTTTGTTCTTTTAGgacctgatcccaacattgaagaaagtcctaaaagaaaaaatgttacatatgaggaattaaggaataagaacagag	0						5'	New	gp4	.((((..((((((((((..((.((((....((((.((((.((((((((((((....((........)).....)))))))))))).))))))))...)))).))...))))))))))..)))).	122	28.2	-32.4	1.75001	1.32502	1.03181	1.735	3.27953	1.27636	0.770496	3.59169	0.86676	0	1.86097	6.77767	low
390	382	PC-5p-31381_45	CACCCTTTCCTGTGCCCTTTT	21	8	+	41758987	41759052	atCACCCTTTCCTGTGCCCTTTTaaggttgacgtagtgccttaaaaggctaacacagaagggtaaa	0						5'	New	gp4	...((((((..(((((.(((((((((((.........)))))))))))....)))))))))))...	60	43.9	-26.6	12.2501	10.6002	7.22269	13.88	4.09941	12.7636	10.7869	6.46505	6.06732	12.1714	9.92515	8.81097	middle
332	324	PC-3p-173288_4	GCCGGCCTGCCTAGAGCCT	19	8	-	58798965	58799067	catgcgggggcggggcccggcagaacagggcccggccgcgccgagacagttggcggagtcttgcggccggacGCCGGCCTGCCTAGAGCCTctctcccgcgcc	0						3'	New	gp4	...(((((((.(((((..(((((.....(((((((((((...(((((..........)))))))))))))..)))...)))))....))))).)))))))...	97	77.7	-57.3	0	2.65004	1.03181	0	0.819882	0	0.770496	0.718339	0.86676	6.0857	0.620322	1.35553	low
74	96	bta-miR-301b_R-4	CAGTGCAATGATATTGTCAAA	21	8	-	67901878	67902003	tctgaatagtgattgtggattttgactgcagatgttagaagcaaaccatttctaacagatgtataatctgattaaatatgCAATGCAATGATATTGTCAAAacttattaatcactctttcaggaca	5	bta-mir-301b,eca-mir-301b,cfa-mir-301b,hsa-mir-301b,ptr-mir-301b,	bta-mir-301b	tcctgctggccgcaggtgctctgacgaggttgcactactgtgctttgaggagCAGTGCAATGATATTGTCAAAGCATccgggaccagccttggag	bta-miR-301b	CAGTGCAATGATATTGTCAAAGCAT	3'	Diff	gp2	((((((.((((((((((..(((((((....(((((((...(((...(((...((((((((.....))))).)))...)))...)))..))))))))))))))..)).))))))))..))))))...	123	31	-33.7	8.75004	2.65004	2.06363	8.67499	5.73917	0	0.770496	3.59169	0.86676	4.05713	7.44387	4.0666	low
346	338	PC-3p-200842_3	CGGCGGCTGCAGTGGAGC	18	8	+	76989161	76989252	aaactcaaaacaaaaacaaggggtttgctagggcctccgcggtggCGGCGGCTGCAGTGGAGCccgtggtggggcagggctagaggggccag	0						3'	New	gp4	...((((..((........(((.((..((..((((.((((....)))).))))..))..)).)))))..))))....((((.....))))..	70	64.1	-36.5	0	2.65004	0	0	0	0	0.770496	0	0	4.05713	0.620322	1.35553	low
150	142	PC-5p-439192_2	TCTCTGCTCGCACCCTACTG	20	8	-	87160795	87160878	TCTCTGCTCGCACCCTTCTGgcctcccagtgcagcccctcaaaatgtgtgtgctgtgttcttcctccaggacctgtgagcaata	0						5'	New	gp4	....((((((((...((((((......((..((((....((.....))...))))..))......))))))..))))))))...	77	56	-26.2	0	0	0	3.46999	0	0	0	0	0	0	0	0	low
88	80	PC-3p-105002_7	ACACGATGGATTCTCTGCATT	21	8	-	91616858	91616954	aataccaagtgtaatgtctggacagagaattcatacacagtcctcttaggaaggACACGATGGATTCTCTGCATGtcctgatttacgatttggtctt	0						3'	New	gp4	...(((((((((((.(((.(((((((((((((((.....((((((....).)))))...)))))))))))....)))).))))))).)))))))...	91	41.2	-36.1	0	0	0	1.735	0.819882	0	1.54099	2.87336	0	3.04285	0	0.677767	low
314	306	PC-3p-237599_3	TTGGTGTTCTCTGTCCCTGAGA	22	8	+	92804303	92804429	atcgtgcaaatggccttctcccgtggacctcagcacaaCAGGGACACGAGAACACACTTAagggaagtagcatttTTGGTGTTCTCTGTCCCTGAGAcgtgtcctcggaagaatatatttttactta	0						3'	New	gp4	...((..(((((...((((.(((.((((....((....((((((((.((((((((...(((..(........)..)))))))))))))))))))....)))))).))).))))..)))))..))...	121	46.5	-43.2	0	0	0	3.46999	0	0	0	1.43668	0	0	0.620322	0	low
124	152	ssc-miR-9843-3p	TCTGTGAACTAGAAACCTCTGG	22	8	-	122371862	122371949	tcttacacagctttccAGAGGTTTCCAGCTTATAGGATattcatatggtagtTCTGTGAACTAGAAACCTCTGGaaagtggtgtacat	1	ssc-mir-9843,	ssc-mir-9843	tacacagctttccagaggtttccagcttataggatattcatatggtagtTCTGTGAACTAGAAACCTCTGGaaagtggtgt	ssc-miR-9843-3p	TCTGTGAACTAGAAACCTCTGG	3'	Yes	gp2	...(((((..(((((((((((((((.((.(((((((((..((....))..))))))))).)).)))))))))))))))..)))))...	82	39.8	-42.7	22.7501	25.1754	15.4772	19.085	26.2362	11.4873	16.9509	29.4519	15.6017	22.3142	29.1551	20.333	middle
220	212	PC-3p-440540_2	GCAGGTGTGGGAATAGGTAGAGC	23	8	+	126328537	126328595	aagtctgcctacatccagcctgtccttctaactggGCAGGTGTGGGAATAGGTAGAGCa	0						3'	New	gp4	...((((((((..((((((((((((........)))))))).))))..))))))))...	53	52.5	-29.9	0	0	2.06363	3.46999	0	0	0	0	0	0	0	0	low
79	71	PC-3p-81730_11	GCCCTAGGAGTTAGAGCT	18	8	-	131181124	131181201	caccaagtgctttgaatcctgggttcgtcagaaaagctctagaaaacGCCCTAGGAGTTAGAGCTaacttgaccgtga	0						3'	New	gp4	(((((((((((((((.((((((((...(((((.....))).))....)))).)))).)))))))..)))))...))).	77	47.4	-26.5	3.50002	1.32502	0	0	2.45964	6.38181	2.31149	2.15502	2.60028	7.09998	1.24064	2.71107	low
125	117	PC-3p-75100_12	CCTCCAGGTGGTCTCCCTGCT	21	8	+	140117374	140117460	acaggctgggaggaagacagggagcccgtcttggctcttacatcacagtagCCTCCAGGTGGTCTCCCTGCTctgctccacgccccc	0						3'	New	gp4	...(((..((((..((((((((((.(((.(((((...((((......))))...)))))))).))))))).))).))))..)))...	81	63.2	-39.4	1.75001	1.32502	0	1.735	0	0	3.08198	1.43668	0.86676	5.07142	1.24064	4.74437	low
286	278	PC-5p-453228_2	GTAAATGTGAATGTCACTTAGC	22	8	+	145884588	145884691	caGTAAATTTGAATGTCACTTAGCaatgagctctaggtcccttctttggagagaaagagaaagagttgggactttggagtaatgcaggtcttttcaaatttaaa	0						5'	New	gp4	...((((((((((....((((.(((....((((((((((((((((((........))))))......))))).)))))))..)))))))...))))))))))..	99	37.5	-31	3.50002	0	0	0	0	0	0	0	0	0	0	0	low
414	406	PC-5p-302587_2	ACTGTAAGTCTAATCCGCAGA	21	8	-	147805758	147805814	ttACTGTAAGTCTAATCCGCAGAattctctgatgtgcggaattagactttacaggtg	0						5'	New	gp4	...((((((((((((((((((..(((....))).))))).))))))))).))))...	51	40.4	-22.8	3.50002	0	0	0	0	0	0	0	0	0	0	0	low
113	139	ssc-mir-4332-p5	CCGGGGGTGGGGCCGGCG	18	9	-	2486772	2486877	ggagagCCGGGGGTGGGGGCGGCGgggaggaagggctggcccaagaggaataacttgctgggctggttcaagattcccagggcgcttcctccaggcccggttcagg	1	ssc-mir-4332,	ssc-mir-4332	cggcggggggtgtcgcgggggtgggcgggctggggccgggggtggggccggcgggggcacgacccccggtcggcgtcCACGGCCGCCGCCGGGCGCCtttccaccgc	ssc-mir-4332-p5	ccgggggtggggccggcg	5'	New	gp2	...((((((((..((((((..((((((((...(..(..(((((.(((......)))..)))))..)..)....)))))....)))..))))))..))))))))...	100	67.9	-59.8	10.5	5.30008	4.12725	6.93999	4.09941	28.08	3.08198	2.87336	1.73352	2.02857	4.34225	0	middle
109	135	ssc-mir-4331-p3	TTGCTGTGGCTGTGGTGTA	19	9	+	5330901	5330978	cgtctccaacaaatctaagctattgtgccagaagtttatccaggtTTGCTGTGGCTGTGGTGTAgattgaccgagtat	1	ssc-mir-4331,	ssc-mir-4331	ccatgagctatggcgtagatcacagacacagctcagatctggcattgcTGTGGCTGTGGTGTAGGCCAGCagctttgctc	ssc-mir-4331-p3	ttgcTGTGGCTGTGGTGTA	3'	New	gp2	...(((.....((((((..((((...((((..(((..((....))..))).)))).))))..))))))....)))...	72	44.9	-19.6	1.75001	2.65004	0	3.46999	0	2.55272	0.770496	0	0	1.01428	1.24064	0	low
40	32	PC-5p-58744_18	AGACTTAGTTTTGCTGCTCTGT	22	9	-	6819082	6819173	gttttggtagggAGACTTAGTTTTGCTGCTCTGActggcgtttccATAGAAGCAAAACTGAGTCATAacctgtgagaagtgttgacaggacc	0						5'	New	gp4	.....(((.....((((((((((((((..((((..(((.....)))))))))))))))))))))....(((((.((.....)).))))))))	51	45.7	-30.5	1.75001	6.6251	1.03181	0	4.91929	2.55272	5.39347	5.02837	4.3338	4.05713	1.24064	2.0333	low
40	33	PC-3p-96113_8	ATAGAAGCAAAACTGAGTCATT	22	9	-	6819082	6819173	gttttggtagggAGACTTAGTTTTGCTGCTCTGActggcgtttccATAGAAGCAAAACTGAGTCATAacctgtgagaagtgttgacaggacc	0						3'	New	gp4	.....(((.....((((((((((((((..((((..(((.....)))))))))))))))))))))....(((((.((.....)).))))))))	51	45.7	-30.5	0	2.65004	2.06363	1.735	0	2.55272	8.47546	0.718339	0	4.05713	0	1.35553	low
100	126	oan-miR-1386	CTCCTGGCTGGCTCGCCA	18	9	+	7464734	7464842	cacgggcgcttcctcagtCTCCTGGCTGGCTCGCCAgttgctgggctgcgccctaccggcctgcaagccctgtactggctcagcctcaagaccaaagaaagagcccaga	1	oan-mir-1386,	oan-mir-1386	aggttccggccagagtgggCTCCTGGCTGGCTCGCCAgacttctccatcaccgtggatggcacgaccatccttcccgtcccgcaggcccgcaatct	oan-miR-1386	CTCCTGGCTGGCTCGCCA	5'	Yes	gp2	...((((.(((.((..((((...((((((...((((((.((.((((((((((.....)))..)).))))).))))))))))))))...))))...)).))).))))...	103	64.2	-51.6	38.5002	30.4755	46.4316	183.91	34.435	49.7781	110.181	17.2401	21.669	12.1714	32.2567	37.2772	middle
67	59	PC-5p-66110_15	TCCTGGCTGGCTCGCCATT	19	9	+	7464734	7464842	cacgggcgcttcctcagtcTCCTGGCTGGCTCGCCAGTtgctgggctgcgccctaccggcctgcaagccctgtactggctcagcctcaagaccaaagaaagagcccaga	0						5'	New	gp4	...((((.(((.((..((((...((((((...((((((.((.((((((((((.....)))..)).))))).))))))))))))))...))))...)).))).))))...	103	64.2	-51.6	1.75001	0	0	12.145	0.819882	2.55272	4.62298	0	0.86676	1.01428	1.24064	3.38884	middle
36	48	ssc-miR-139-3p	TGGAGACGCGGCCCTGTTGGAGT	23	9	-	7935655	7935757	ggagcgggctcaggtgtatTCTACAGTGCACGTGTCTCCAGTgtggctcggaggcTGGAGACGCGGCCCTGTTGGAGTaacaactgatgccagagtctgcnnn	10	ssc-mir-139,bta-mir-139,eca-mir-139,cfa-mir-139,ptr-mir-139,ggo-mir-139,cgr-mir-139,mdo-mir-139,sha-mir-139,oan-mir-139,	ssc-mir-139	gtgtatTCTACAGTGCACGTGTCTCCAGtgtggctcggaggcTGGAGACGCGGCCCTGTTGGAGTaac	ssc-miR-139-3p	TGGAGACGCGGCCCTGTTGGAGT	3'	Yes	gp2	...((((((((.((..((((((((((.((.((((((((((((...........)))))))))))))).)))).)))))........)..)).))))))))...	97	58.3	-47.2	92.7504	41.0757	201.204	149.21	104.945	47.2254	86.2956	126.428	108.345	116.643	57.69	71.8433	middle
378	370	PC-5p-112003_7	AGGGACAGTCGGGGGCATT	19	9	+	9140531	9140619	cctttggaAGGGACAGTCGGGGGTATTagctggggttctttctgagttcaggagtccccctgcatgcccccaacttctcagttcagccc	0						5'	New	gp4	...(((((.((((.(((.((((((((..((.((((..(((.(((....))))))..)))).)))))))))).)))))))..)))))...	83	57.3	-39.5	0	0	0	0	0.819882	0	0	5.02837	1.73352	0	0	1.35553	low
31	26	PC-5p-9242_243	TAGCACTTGTGTTTGTTTTTGT	22	9	+	29684153	29684215	aTAGCACTTGTGTTTGTTTTTGTttcatttgtggacAAAGACTTAGATACAAGTGCAAAaaat	0						5'	New	gp4	...(((((((((((((((((((((.((....)))))))))))..)))))))))))).......	53	30.2	-24	61.2503	41.0757	24.7635	45.1099	36.0748	37.0145	38.5248	31.6069	33.8037	28.3999	32.8771	53.5436	middle
31	27	PC-3p-125777_6	AAAGACTTAGATACAAGTGCAAA	23	9	+	29684153	29684215	aTAGCACTTGTGTTTGTTTTTGTttcatttgtggacAAAGACTTAGATACAAGTGCAAAaaat	0						3'	New	gp4	...(((((((((((((((((((((.((....)))))))))))..)))))))))))).......	53	30.2	-24	7.00003	2.65004	0	3.46999	1.63976	2.55272	0.770496	0.718339	0.86676	2.02857	2.48129	0.677767	low
444	436	PC-3p-70782_14	TCTCTTTTCTTTGTGAAGG	19	9	-	38279919	38280048	ttgtttttctacagaaactaaatgaagtagatgagaatatgtttggacatgtgaaggtgaagggggccgtggggTCTCTTTTCTTTGTGAAGTtcaggtgatggttgtctgctgagagttaggggaaagt	0						3'	New	gp4	....((((((.....((((......((((((..(..((.(..((((((..(..(((..((((((((((....)))))))))))))..)...))))))..)))..)..))))))...))))...)))))).	125	42.3	-34.8	1.75001	2.65004	1.03181	6.93999	1.63976	0	3.85248	0	0	2.02857	0.620322	0	low
460	452	PC-3p-328995_2	ATTAGTAGTAATGAATAGATA	21	9	-	43008075	43008188	taaaaaggattgcactttttctgttgcttactcacttgttatgtttatgatatttaataaatagttaatatgttATTAGTAGTAATGAATAGATAtgcattggaattctttaca	0						3'	New	gp4	...((((((((.((.....((((((..(((((.(((((((((((((((........)))))))..))))).......))))))))..)))))).......)).))))))))...	108	23.7	-19.2	0	0	0	3.46999	0	0	0	0	0	0	0	0	low
330	322	PC-5p-428220_2	CCTCATTCAAGTTTGAAGG	19	9	+	43683347	43683411	aatgagCCTCATTCAAGTTGGAAGGatgactcatggcctgtcagtgctaactagtgaggcttgct	0						5'	New	gp4	...((((((((((..((((((.....((((.........))))...))))))))))))))))...	59	47.7	-24	3.50002	0	0	0	0	0	0	0	0	0	0	0	low
429	421	PC-3p-86540_10	AATCACTAATTCCACTGCCATCT	23	9	-	44167386	44167475	ccggtgctcggtttgtaggcagtgtaattagctgattgtactctggcgcttacAATCACTAATTCCACTGCCATCAaaacaaggcacagc	0						3'	New	gp4	...(((((..((((...(((((((.((((((.((((((((..........)))))))))))))).)))))))....))))..)))))...	84	47.8	-37.2	3.50002	2.65004	0	0	2.45964	2.55272	3.08198	4.31003	1.73352	5.07142	1.24064	2.71107	low
24	31	ssc-miR-34c_2ss11GA23CT	AGGCAGTGTAATTAGCTGATTGT	23	9	-	44167460	44167549	ccggtgctcggtttgtAGGCAGTGTAATTAGCTGATTGTactctggcgcttacAATCACTAATTCCACTGCCATCaaaacaaggcacagc	23	ssc-mir-34c-2,ssc-mir-34c-1,bta-mir-34b,bta-mir-34c,eca-mir-34b,cfa-mir-34b,cfa-mir-34c,hsa-mir-34b,hsa-mir-34c,ptr-mir-34b,ptr-mir-34c,ppy-mir-34b,ggo-mir-34b,ggo-mir-34c,mml-mir-34c,cgr-mir-34b,cgr-mir-34c,mmu-mir-34b,mmu-mir-34c,mdo-mir-34c,mdo-mir-34b,oan-mir-34b,oan-mir-34a,	ssc-mir-34c-1	agtctagttactAGGCAGTGTAGTTAGCTGATTGCtgataaaaccaatcactaaccacacggccaggtaaaaagatttgg	ssc-miR-34c	AGGCAGTGTAGTTAGCTGATTGC	5'	Diff	gp2	...(((((..((((...(((((((.((((((.((((((((..........)))))))))))))).)))))))....))))..)))))...	84	47.8	-37.2	322.876	353.118	136.199	131.86	356.649	315.261	399.117	283.385	323.302	312.906	285.348	250.096	middle
24	32	eca-miR-34b-3p_1ss10CT	AATCACTAATTCCACTGCCATC	22	9	-	44167460	44167549	ccggtgctcggtttgtAGGCAGTGTAATTAGCTGATTGTactctggcgcttacAATCACTAATTCCACTGCCATCaaaacaaggcacagc	23	ssc-mir-34c-2,ssc-mir-34c-1,bta-mir-34b,bta-mir-34c,eca-mir-34b,cfa-mir-34b,cfa-mir-34c,hsa-mir-34b,hsa-mir-34c,ptr-mir-34b,ptr-mir-34c,ppy-mir-34b,ggo-mir-34b,ggo-mir-34c,mml-mir-34c,cgr-mir-34b,cgr-mir-34c,mmu-mir-34b,mmu-mir-34c,mdo-mir-34c,mdo-mir-34b,oan-mir-34b,oan-mir-34a,	eca-mir-34b	gtgctcggtttgtAGGCAGTGTAATTAGCTGATTGTactctggagcttacAATCACTAACTCCACTGCCATCaaaacaaggcac	eca-miR-34b-3p	AATCACTAACTCCACTGCCATC	3'	Diff	gp2	...(((((..((((...(((((((.((((((.((((((((..........)))))))))))))).)))))))....))))..)))))...	84	47.8	-37.2	24.5001	29.1505	17.5408	13.88	30.3356	31.9091	47.0003	42.382	50.2721	47.6713	42.8022	58.9657	middle
36	30	PC-3p-57744_19	ATTCCAGAAATTAAGGGGCTT	21	9	+	55083626	55083714	tgtgcaacttgagtaagccccttaatttctggaatcccctaaattccccctaggATTCCAGAAATTAAGGGGCTTgctcaagttgcccc	0						3'	New	gp4	...((((((((((((((((((((((((((((((((((...............))))))))))))))))))))))))))))))))))...	83	47.2	-61	0	0.66251	1.03181	0	2.86959	0	2.69674	3.23252	3.03366	2.53571	1.55081	3.72772	low
179	171	PC-3p-204226_3	TCAGTGAGCAGAAAGGTA	18	9	-	57793694	57793756	agaccaagacctttcctcccctcgctttgatatcaTCAGTGAGCAGAAAGGTActgttggaac	0						3'	New	gp4	...((((((((((((.....((((((.((....))..))))))..))))))).))..)))...	57	47.6	-17.4	0	0	0	0	0	3.82909	0	0	0	0	0	0	low
308	300	PC-3p-126408_6	TGGCTACCCCCAGGACTGC	19	9	-	73613926	73614043	gctgcgcggcctcggtttccagccgggcctttttcacagccgggccccagcaTGGCTACCCCCAGGACTGCgtgtcgggaagccgctgtgctctctctttcctgacagtccctagctt	0						3'	New	gp4	((((((((((((.(((..(((((.((((((...........))))))..)).)))..)))...))).))))))((((((((((......))).......))))))).......)))..	70	65.3	-43.7	3.50002	3.97506	1.03181	0	1.63976	0	3.08198	1.43668	5.20056	4.05713	0.620322	0.677767	low
473	465	PC-3p-42088_30	TGTATTTTTGGAAACAGGAGA	21	9	+	75529635	75529715	gtctggtatattctttgattctagtggtaatgagagagatttgctctttttaagTGTATTTTTGGAATCAGGAGAccaagg	0						3'	New	gp4	...((((...(((.((((((((((..(((..(((((((.....)))))))......)))..)))))))))))))))))...	75	35.8	-22	0	0	0	0	0	0	0	8.62007	0	4.05713	9.30483	0	low
106	98	PC-5p-36954_36	CATAAGCTTGCGTTGATT	18	9	+	76932944	76933024	gCATAAGCTTGAGTTGATTaaggaattttactttgaaaattaatttggtaatagtaacttaatatatattcatgcttacag	0						5'	New	gp4	...(((((.(((((..((((((..((((((((..............))))).)))..))))))....))))).)))))...	75	24.7	-16.3	21.0001	18.5503	13.4136	19.085	22.1368	12.7636	17.7214	3.59169	1.73352	4.05713	6.82354	2.0333	middle
135	127	PC-3p-116366_6	TGAGGGCAGGTGCTGAGCTT	20	9	-	125249282	125249381	cctaagctcccagtcttgccctcacatttggtcagaggcaaacatcatagagacaaaggccaaactcacactcaaccTGAGGGCAGGTGCTGAGCTTatt	0						3'	New	gp4	..(((((((..(((((((((((((...(((((..(((((.....((.....)).....)))....))..)).)))..)))))))))).))))))))))..	96	50	-32.5	0	3.97506	0	1.735	0.819882	2.55272	0	0.718339	0	0	1.24064	0	low
104	130	bta-miR-3120	CACAGCAAGTGTAGACAGGCA	21	9	+	126099459	126099563	tcaggctgggttgtcatgtgACTGCCTGTCTGTGCCTGCTGTAcaggtgagcggatgttctgCACAGCAAGTGTAGACAGGCAgacacatgacaactccgtccag	2	bta-mir-3120,rno-mir-3120,	bta-mir-3120	gtcatgtgactgcctgtctgtgcctgctgtacaggtgagcggatgttctgCACAGCAAGTGTAGACAGGCAgacacatgac	bta-miR-3120	CACAGCAAGTGTAGACAGGCA	3'	Yes	gp2	...(((.(((((((((((((.(((((((((((..(.((((((.((((...........)))).)))))).)..))))))))))).))))))))))))).)))...	99	55.2	-63	21.0001	10.6002	10.3181	6.93999	11.4783	14.04	0.770496	7.90173	9.53436	2.02857	4.96258	10.8443	middle
61	79	ssc-miR-199b-5p_R+1_2ss10TC17TC	CCCAGTGTTCAGACTACCTGTTC	23	9	-	126105204	126105295	gatcctgctccgtcgcCCCAGTGTTCAGACTACCTGTTCaggacaatgccgttgtACAGTAGTCTGCACATTGGTTagactgggcaagggaa	31	ssc-mir-199b,ssc-mir-199a-1,ssc-mir-199a-2,bta-mir-199a-1,bta-mir-199a-2,bta-mir-199b,bta-mir-199c,eca-mir-199b,eca-mir-199a,cfa-mir-199-3,cfa-mir-199-1,cfa-mir-199-2,hsa-mir-199b,hsa-mir-199a-2,hsa-mir-199a-1,ptr-mir-199b,ptr-mir-199a-1,ppy-mir-199b,mml-mir-199a-2,lla-mir-199a,cgr-mir-199a,cgr-mir-199b,mmu-mir-199b,mmu-mir-199a-2,mmu-mir-199a-1,rno-mir-199a,mdo-mir-199b-2,mdo-mir-199b-3,mdo-mir-…	ssc-mir-199b	ccgtctaCCCAGTGTTTAGACTATCTGTTcaggactcccaaattgtACAGTAGTCTGCACATTGGTTAggctgg	ssc-miR-199b-5p	CCCAGTGTTTAGACTATCTGTT	5'	Diff	gp2	..((((((((.(((...(((((((.((((((((.(((...((......)).....))))))))))).)))))))...))).))))).)))..	88	53.3	-40.4	0.875004	7.95013	7.7386	58.9899	5.32923	4.46727	29.2789	9.3384	14.7349	25.8642	12.4064	10.1665	middle
61	80	ssc-miR-199a-3p_R-1	ACAGTAGTCTGCACATTGGTT	21	9	-	126105204	126105295	gatcctgctccgtcgcCCCAGTGTTCAGACTACCTGTTCaggacaatgccgttgtACAGTAGTCTGCACATTGGTTagactgggcaagggaa	31	ssc-mir-199b,ssc-mir-199a-1,ssc-mir-199a-2,bta-mir-199a-1,bta-mir-199a-2,bta-mir-199b,bta-mir-199c,eca-mir-199b,eca-mir-199a,cfa-mir-199-3,cfa-mir-199-1,cfa-mir-199-2,hsa-mir-199b,hsa-mir-199a-2,hsa-mir-199a-1,ptr-mir-199b,ptr-mir-199a-1,ppy-mir-199b,mml-mir-199a-2,lla-mir-199a,cgr-mir-199a,cgr-mir-199b,mmu-mir-199b,mmu-mir-199a-2,mmu-mir-199a-1,rno-mir-199a,mdo-mir-199b-2,mdo-mir-199b-3,mdo-mir-…	ssc-mir-199a-2	ccccgccaaCCCAGTGTTCAGACTACCTGTTCagggggctctgaatgtgtACAGTAGTCTGCACATTGGTTAggctgggc	ssc-miR-199a-3p	ACAGTAGTCTGCACATTGGTTA	3'	Diff	gp2	..((((((((.(((...(((((((.((((((((.(((...((......)).....))))))))))).)))))))...))).))))).)))..	88	53.3	-40.4	153.126	230.554	212.553	884.849	166.026	126.36	443.035	456.863	536.091	533.513	374.054	170.12	middle
97	89	PC-3p-6380_396	AATTCAATTCTGAGGCTT	18	9	-	127782776	127782883	tttttgttaagcctatgatggttaaagagtagtgggcagaaggaatttctgaaaAATTCAATTCTGAGGCTTaaattcttaagatattaatggttagcttagcaacgc	0						3'	New	gp4	...(((((((((((((((((....(((((((((...(((((.((((((.....))))))..)))))..)))...))))))....)))).))))...)))))))))...	102	33.3	-24.7	164.501	249.104	177.472	74.6049	377.146	151.887	117.886	252.855	253.094	400.642	297.755	129.454	middle
15	15	PC-3p-76894_12	TCTCCTTGCGAGTCTCTGCTGCC	23	9	+	147940106	147940204	agagcccggctggccggggcggggactcgtatggaaggagacgctgctggtgacctgttcTCTCCTTGCGAGTCTCTGCTGCCtggcgtctcgggccaa	0						3'	New	gp4	...((((((...(((((((((((((((((((.(((..(((.(((.....))).....)))..))).)))))))))))))..))))))...))))))...	93	66.7	-52.2	0	0	0	0	0.409941	1.27636	3.85248	0	0.86676	2.02857	2.79145	1.01665	low
67	87	ssc-miR-215_L-1R+1_1ss20AC	TGACCTATGAATTGACAGCCA	21	10	-	11786601	11786697	aagagatggtgtacaggaaaaTGACCTATGAATTGACAGACAatgtggctaaatctgTCTGTCATTTCTGTAGGCCAATattctgtatatctctgct	26	ssc-mir-215,ssc-mir-192,bta-mir-215,bta-mir-192,eca-mir-215,eca-mir-192,cfa-mir-192,hsa-mir-215,hsa-mir-192,ptr-mir-215,ptr-mir-192,ppy-mir-215,ggo-mir-215,ggo-mir-192,mml-mir-215,mml-mir-192,cgr-mir-215,cgr-mir-192,mmu-mir-192,mmu-mir-215,rno-mir-215,rno-mir-192,mdo-mir-215,oan-mir-215,oan-mir-192,	ssc-mir-215	agagatggtgtacaggaaaATGACCTATGAATTGACAGACaatgtggctaaatctgtctgtcatttctgtaggccaatattctgtatatctctgct	ssc-miR-215	ATGACCTATGAATTGACAGAC	5'	Diff	gp2	...(((.(((((((((((...((.((((((((.(((((((((((........)).))))))))).))).))))).))...))))))))))))))...	91	38.1	-37	19.2501	47.7008	30.9544	26.8925	36.4847	36.3763	34.2871	71.8339	66.7405	54.7713	47.7648	28.4662	middle
57	75	ssc-miR-194b-5p_1ss10GA	TGTAACAGCAACTCCATGTGGA	22	10	-	11786901	11786989	taatggcgccatcagcTGTAACAGCGACTCCATGTGGActgtgccccaatttccagtggagatgctgttacctttgacggcgaccagct	19	ssc-mir-194b,ssc-mir-194a,bta-mir-194-1,bta-mir-194-2,oar-mir-194,eca-mir-194-2,eca-mir-194-1,cfa-mir-194,hsa-mir-194-1,hsa-mir-194-2,ppy-mir-194,mml-mir-194-2,cgr-mir-194,mmu-mir-194-1,mmu-mir-194-2,rno-mir-194-2,rno-mir-194-1,oan-mir-194-1,oan-mir-194-2,	ssc-mir-194b	cgccatcagcTGTAACAGCGACTCCATGTGGActgtgccccaatttCCAGTGGAGATGCTGTTACCTTtgacggcgac	ssc-miR-194b-5p	TGTAACAGCGACTCCATGTGGA	5'	Diff	gp2	...(((((((.((((..((((((((..((((((.((((..((......)).))))))))))..))))))))..)))).)))).)))...	83	53.9	-40.4	50.7502	47.7008	41.2725	55.5199	54.9321	56.1599	17.7214	42.382	52.8724	24.3428	44.6632	70.4878	middle
66	86	ssc-miR-215_R+1	ATGACCTATGAATTGACAGACA	22	10	+	11963148	11963244	aagagatggtgtacaggaaaATGACCTATGAATTGACAGACAatgtggctaaatctgtctgtcatttctgtaggccaatattctgtatatctctgct	28	ssc-mir-215,ssc-mir-192,ssc-mir-194b,bta-mir-215,bta-mir-192,eca-mir-215,eca-mir-192,cfa-mir-192,cfa-mir-194,hsa-mir-215,hsa-mir-192,ptr-mir-215,ptr-mir-192,ppy-mir-215,ggo-mir-215,ggo-mir-192,mml-mir-215,mml-mir-192,cgr-mir-215,cgr-mir-192,mmu-mir-192,mmu-mir-215,rno-mir-215,rno-mir-192,mdo-mir-215,oan-mir-215,oan-mir-192,oan-mir-194-1,	ssc-mir-215	agagatggtgtacaggaaaATGACCTATGAATTGACAGACaatgtggctaaatctgtctgtcatttctgtaggccaatattctgtatatctctgct	ssc-miR-215	ATGACCTATGAATTGACAGAC	5'	Diff	gp2	...(((.(((((((((((...((.((((((((.(((((((((((........)).))))))))).))).))))).))...))))))))))))))...	91	38.1	-37	7.00003	26.5004	10.3181	10.41	21.3169	19.1454	14.2542	41.6636	32.9369	37.5285	24.1926	11.1832	middle
233	225	PC-3p-430155_2	CTTTTCCTTGACTGTCTCTCA	21	10	-	21081126	21081231	tgtatccatgatgcttactgaggggagttgggggtgggggcggtgggaagccccacgagcccggtgcCTTTTCCTTGACTGTCTCTCActcagcttattggattcc	0						3'	New	gp4	...(((((....(((...((((((((((..((((.((((((.(((((....)))))..))))....))...))))..))).)))))))...)))....)))))...	100	57.5	-45	3.50002	0	0	0	0	0	0	0	0	0	0	0	low
46	62	hsa-miR-181a-3p	ACCATCGACCGTTGATTGTACC	22	10	-	26427057	26427153	gtttagaggttgcttcagtgAACATTCAACGCTGTCGGTGAGTttggaattcaaatcaaaACCATCGACCGTTGATTGTACCctatggccaaccatc	74	ssc-mir-181a-2,ssc-mir-181a-1,ssc-mir-181c,ssc-mir-181b-2,ssc-mir-181b-1,ssc-mir-181d,bta-mir-181a-1,bta-mir-181a-2,bta-mir-181c,bta-mir-181b-2,bta-mir-181b-1,bta-mir-181d,oar-mir-181a-1,oar-mir-181a-2,eca-mir-181a,eca-mir-181a-2,eca-mir-181b,cfa-mir-181a-1,cfa-mir-181a-2,cfa-mir-181c,cfa-mir-181b-1,cfa-mir-181b-2,cfa-mir-181d,hsa-mir-181a-1,hsa-mir-181a-2,hsa-mir-181c,hsa-mir-181b-1,hsa-mir-181d…	hsa-mir-181a-1	tgagttttgaggttgcttcagtgAACATTCAACGCTGTCGGTGAGTttggaattaaaatcaaaACCATCGACCGTTGATTGTACCctatggctaaccatcatctactcca	hsa-miR-181a-3p	ACCATCGACCGTTGATTGTACC	3'	Yes	gp2	.......(((((((..((...(((.((((((..(((((((.((((.((.......)).))))))))))))))))).)))...))..))).))))...	87	44.3	-30.9	4896.52	5671.75	5604.81	5226.68	5471.89	4834.86	6838.15	6881.33	5444.12	7773.47	5301.89	4333.64	middle
62	55	PC-3p-39357_33	TACGAATTTCAGGAATACAGCA	22	10	+	27752738	27752812	accaCTTTGCTGTATTCCTGAAATTcgtatcaattgaactgattcaTACGAATTTCAGGAATACAGCAaagtagc	0						3'	New	gp4	...(((((((((((((((((((((((((((.((((.....)))).)))))))))))))))))))))))))))...	69	36	-43.8	2.62501	6.6251	2.06363	0.867499	2.0497	1.27636	1.92624	2.15502	2.1669	4.05713	0.620322	1.69442	low
11	13	ssc-miR-27b-5p_R-1	AGAGCTTAGCTGATTGGTGAAC	22	10	-	31340825	31340926	acgacctctctgacgaggtgcAGAGCTTAGCTGATTGGTGAACagtgactggtttccgctttgTTCACAGTGGCTAAGTTCTGCacctgaagagaaggtgag	54	ssc-mir-27b,ssc-mir-27a,bta-mir-27b,bta-mir-27a,oar-mir-27a,eca-mir-27b,eca-mir-27a,cfa-mir-27b,cfa-mir-27a,hsa-mir-27b,hsa-mir-27a,hsa-mir-23c,ptr-mir-27b,ptr-mir-23c,ppy-mir-27a,ggo-mir-27b,mne-mir-27a,age-mir-27a,lca-mir-27a,cgr-mir-27b,cgr-mir-27a,mmu-mir-27b,mmu-mir-27a,rno-mir-27a,mdo-mir-27b,mdo-mir-27a,sha-mir-27b,oan-mir-27b,oan-mir-27a,	ssc-mir-27b	acgaggtgcAGAGCTTAGCTGATTGGTGAACAgtgactggtttccgctttgTTCACAGTGGCTAAGTTCTGCacctgaag	ssc-miR-27b-5p	AGAGCTTAGCTGATTGGTGAACA	5'	Diff	gp2	...((((((((....(((((((((((((((((.((((.(((((((....(((...)))..))))))))))))))))))))))))))))..))))).)))...	96	51	-50.2	31.5001	49.0258	24.7635	17.35	28.6959	17.8691	44.6888	28.0152	98.8107	45.6427	36.599	58.9657	middle
11	14	ssc-miR-27b-3p	TTCACAGTGGCTAAGTTCTGC	21	10	-	31340825	31340926	acgacctctctgacgaggtgcAGAGCTTAGCTGATTGGTGAACagtgactggtttccgctttgTTCACAGTGGCTAAGTTCTGCacctgaagagaaggtgag	54	ssc-mir-27b,ssc-mir-27a,bta-mir-27b,bta-mir-27a,oar-mir-27a,eca-mir-27b,eca-mir-27a,cfa-mir-27b,cfa-mir-27a,hsa-mir-27b,hsa-mir-27a,hsa-mir-23c,ptr-mir-27b,ptr-mir-23c,ppy-mir-27a,ggo-mir-27b,mne-mir-27a,age-mir-27a,lca-mir-27a,cgr-mir-27b,cgr-mir-27a,mmu-mir-27b,mmu-mir-27a,rno-mir-27a,mdo-mir-27b,mdo-mir-27a,sha-mir-27b,oan-mir-27b,oan-mir-27a,	ssc-mir-27b	acgaggtgcAGAGCTTAGCTGATTGGTGAACAgtgactggtttccgctttgTTCACAGTGGCTAAGTTCTGCacctgaag	ssc-miR-27b-3p	TTCACAGTGGCTAAGTTCTGC	3'	Yes	gp2	...((((((((....(((((((((((((((((.((((.(((((((....(((...)))..))))))))))))))))))))))))))))..))))).)))...	96	51	-50.2	61255.5	65252.6	73052.9	78460.1	66018.9	70074.8	87205.9	69597.3	74461.2	101899	73791.3	77248.5	high
140	132	PC-3p-435941_2	TCTGAAGGCCTTGGTTACCAGC	22	10	+	33173605	33173705	gcttagactgtctaaaaaaatgTTGGGGACCGAGACCTTCAGAGACctcggcgctgagtggggTCTGAAGGCCTTGGTTACCAGCatttctcggtctgttt	0						3'	New	gp4	...(((((((.......(((((((((..((((((.((((((..(((((((.(.....)))))))))))))).))))))..)))))))))..)))))))...	95	51.5	-46.6	3.50002	0	0	0	0	0	0	0	0	1.01428	0	0	low
106	132	hsa-miR-3653-3p_L+2	CTCTAAGAAGTTGACTGAAG	20	10	-	36055610	36055679	gacctctggctcttctatcagaactttcaaagtgaaaagCTCTAAGAAGTTGGCTGAAGagacagagaga	1	hsa-mir-3653,	hsa-mir-3653	tccctggggacccctggcagccCCTCCTGATGATTCTTCTTCctgagcacgctcatgatgagcaaactgagcctCTAAGAAGTTGACTGAAGgggctgcttccccaagga	hsa-miR-3653-3p	CTAAGAAGTTGACTGAAG	3'	Diff	gp2	...(((((.((((((..(((..(((((...(((.....)))....))))))))..)))))).)))))...	64	42.9	-20.8	22.7501	22.5254	9.28632	15.615	9.83858	15.3163	3.85248	3.59169	10.4011	12.1714	4.96258	6.0999	middle
455	447	PC-5p-232994_3	ACTGTGTGAAGGCCTTGACTCT	22	10	+	63301255	63301314	agACTGTGTGAAGGCCTTGACTCAgagctttcctgagcaagggctacgtccacacagagc	0						5'	New	gp4	...(((((((.((.(((((.(((((.......)))))))))).)).....)))))))...	54	55	-25.7	0	0	0	0	0	0	0	0	0	3.04285	0	0	low
354	346	PC-5p-27268_55	ACTCTCATGATGAACCTTT	19	10	-	69022906	69023013	aaaagccctcACACTCATGATGAACCTTTtactgtcatgtctttggaatgatttaaattcttaagcccagaaactgttattaatgcaaagtgtgagatttaggctgga	0						5'	New	gp4	...(((((((((((((((....(((..(((.(((....(.(((..((((.......))))..)))).))))))..)))....)))...)))))))).....))))...	102	36.1	-23.4	0	7.28762	10.834	8.67499	13.938	8.93454	2.31149	1.43668	1.73352	0	1.86097	1.35553	middle
202	194	PC-5p-185434_3	CTTCTATGATGATTGTTACTGAGA	24	10	+	70581950	70582059	tttcctTTTCTATGATGATTGTTACTGAGAtccagactcggggatgaataagaaagcacaagaagcatcttaatgagtctacctttttcagaaaaagtccttagaaaggg	0						5'	New	gp4	...(((((((((....((((.((.((((((...(((((((.(((((...................)))))...))))))).....)))))).)).))))..)))))))))	107	37.3	-28	1.75001	0	0	1.735	0	0	3.08198	0.718339	0	0	0.620322	0	low
355	347	PC-3p-377993_2	GTGTCAAAAGCAGAAGAACC	20	10	+	73327306	73327428	gtgtgtggttttcctgtttaatttgtttatggtgaagggcttccttgtttattacaaggcttagcatctagtcttttGTGTCAAAAGCAGAAGAACCcagggcacagcagtttgatttctcgt	0						3'	New	gp4	.(((((((((((.((((((...(((..((..(.((((((((.((((((.....))))))...))).)))..))..)..)).))))))))).))))))....))))).................	105	40.7	-27.2	0	0	0	5.20499	0.819882	0	0.770496	0.718339	0	0	0	0.677767	low
170	162	PC-5p-218146_3	AGGAGCTCCTTCTGCAGCCC	20	10	+	75727651	75727769	ccaggacgaggagtctgagtgcaggcAGGAGCTCCTTCTGCAGCCCagcaaatcctccactggtctgggtgatcagagggggtgcctgcccgcggggctcacagtggcgtccgtccaga	0						5'	New	gp4	...(((((.(..((((((((((.((((((..(((((((((..((((((.....((......)).))))))...)))))))))..)))))).))...)))))....)))..))))))...	113	65.5	-60.1	0	0	3.09544	0	0	0	0.770496	2.87336	0.86676	2.02857	2.48129	0	low
59	52	PC-5p-30606_47	TGCACAACAGAGCGAGCCAGCT	22	11	-	4056340	4056428	gcttggccgtttctgcTGCACAACAGAGCGAGCCAGCTgggagcgngacaccCTGACTCACTCTGTTGTGCAGCagaaagtggtcacaa	0						5'	New	gp4	...(((((((((((((((((((((((((.(((.(((..((..........))))).))).))))))))))))))))))).))))))...	83	57.3	-51.3	8.75004	3.97506	5.15907	5.20499	8.19882	8.93454	3.85248	5.74671	6.06732	2.02857	7.44387	9.48874	low
59	53	PC-3p-6183_415	CTGACTCACTCTGTTGTGCAGC	22	11	-	4056340	4056428	gcttggccgtttctgcTGCACAACAGAGCGAGCCAGCTgggagcgngacaccCTGACTCACTCTGTTGTGCAGCagaaagtggtcacaa	0						3'	New	gp4	...(((((((((((((((((((((((((.(((.(((..((..........))))).))).))))))))))))))))))).))))))...	83	57.3	-51.3	91.0004	106.002	106.277	107.57	116.423	57.4363	77.0496	71.1155	100.544	64.9141	67.6151	77.2654	middle
78	70	PC-3p-1195213_1	GGAGGCTCTGTTGGTTCTCCC	21	11	+	14465215	14465344	agccgatttcacacttacctaggaacacaagagagggagagaaagcaggcacagatcaggatgattttacaGGAGGCTCTGTTGTTTCTCCCagggtgtgtgttcctggtgtaccaaagtgaaattgaaa	0						3'	New	gp4	...(((((((((...((((((((((((((.....((((((((.(((((((..(((((.....)))))........)).))))).))))))))......))))))))))).))).....)))))))))...	124	46.2	-50.9	0	0	0	5.20499	0	0	0	0	0	0	0	0	low
82	74	PC-3p-4647_623	ATATGGGTACTTTGACCA	18	11	-	19718839	19718929	tatgtaattgtactaatgttttcttaaaagagtaacattttatgccagtttacatgttttctccttaaaataATATTGGTACTTTGACCAc	0						3'	New	gp4	...((....(((((((((((...((((.((((.(((((...............)))))))))..))))...)))))))))))....))...	85	26.4	-15.2	61.2503	72.8762	35.0816	65.9299	77.0689	118.702	64.7217	8.62007	26.8696	38.5428	47.1445	24.3996	middle
416	408	PC-5p-242896_3	TATGGAGAAAAACTTAATACACAGC	25	11	-	19803226	19803348	actttaatttgttcttgaacagtcaagaaaaacatTATGGAGAAAAACTTAATACACAGCataataaccccaccctttgtattttgtgcagtgattattttttaaaatcttctttcatgtaag	0						5'	New	gp4	...........(((((((....)))))))..((((...(((((((((..((((.(((.((((((...................)))))).)))))))..))))....)))))....))))...	89	28.5	-20.8	3.50002	1.32502	1.03181	0	2.45964	2.55272	0.770496	0	0	0	0.620322	0.677767	low
412	404	PC-5p-198632_3	CTTCCTCCCCCAGGACGTGTGC	22	11	+	22821475	22821531	ccCTTCCTCCCCCAGGACGTGTGCcgagccgaggcgcctgcccggagggaggaaaat	0						5'	New	gp4	...((((((((((.((.(..(((((.......)))))..))).)).))))))))...	51	70.2	-29.3	0	0	0	3.46999	0.819882	1.27636	0	2.87336	0	1.01428	0.620322	2.0333	low
381	373	PC-3p-77285_12	CGGAGCTGTAGCCACCGGC	19	11	+	24457426	24457505	acacaggatcccacgtgtgggcgtttctggatcggaggcttgggcgtgaagcCGGAGATGTAGCCACCGGCttcctggca	0						3'	New	gp4	...(((((.....((.((((((((((((((.(((...((....)).)))..))))))))))..))))))...)))))...	74	62.5	-29.5	0	1.32502	2.06363	3.46999	4.09941	1.27636	0.770496	0	0	1.01428	0	0	low
368	360	PC-3p-209134_3	ATCATCTTGTGAAAAGAC	18	11	-	50989168	50989266	ttaaagatgctccaacaaagttgtgttctttaggatgaatgattaaatgggcatttcagATCATCTTGTGAAAAGACtttattacttgagcgtcttctc	0						3'	New	gp4	...(((((((((.((.((((((...(((..((((((((.(((.............)))..)))))))).)))..)))))).))....)))))))))...	93	34.3	-26.7	0	3.97506	0	0	0	0	0	0	0	0	0	0	low
121	113	PC-3p-336770_2	GAGCTCTTGCTGAGATAGG	19	11	-	54112916	54112982	gagctgtctttcagcaagcgcttgatgctaggtggtagGAGCTCTTGCTGAGATAGGgtgcggtggc	0						3'	New	gp4	...(((((..((((((((.((((..((((....)))).)))).)))))))))))))...........	53	56.7	-25.1	0	0	0	0	0	3.82909	0	0	0	1.01428	0	0	low
93	119	ssc-miR-671-5p_R-4	AGGAAGCCCTGGAGGGGCTG	20	11	-	75141594	75141743	gacgtttttctctctcttacttgaccagtctcaggacctggactgagtagaAGGAAGCCCTGGAGGGGATGcgcccgcagacactgctgagtggagcccctcagggcttctgtcctaacgtcctactgtgattaggatttgaaagacatt	11	ssc-mir-671,bta-mir-671,eca-mir-671,aja-mir-671,cfa-mir-671,hsa-mir-671,ptr-mir-671,ggo-mir-671,cgr-mir-671,mmu-mir-671,rno-mir-671,	ssc-mir-671	caggaagaggAGGAAGCCCTGGAGGGGCTGGAGGtgatggatgttttccTCCGGTTCTCAGGGCTCCACCttttccgggc	ssc-miR-671-5p	AGGAAGCCCTGGAGGGGCTGGAGG	5'	Diff	gp2	...(((((((....(((((.((...((((...(((((..((((.........((((((((((.(((((...(((.(((((...)))).).)))...)))))))))))))))))))....))))))))).)).)))))...)))))))...	144	52.7	-57.9	7.87504	3.97506	10.3181	6.07249	6.14911	10.8491	3.46723	3.59169	5.63394	4.56427	6.82354	4.74437	middle
260	252	PC-3p-419559_2	TGTCTTGAGAACTTTGCCACA	21	11	+	75694856	75694994	ctgcccgtcctagccttttgtaatatccttgccccgtgtggtaaagttgtcaagacagccaattactcacagtcaaacgcTGTCTTGAGAACTTTGCCACAtggggcaaggatattacaaaaggctaggatgggcaagg	0						3'	New	gp4	.(((((((((((((((((((((((((((((((((((((((((((((((.((((((((((.....((.....)).....)))))))))).)))))))))))))))))))))))))))))))))))))))))))))))...	135	48.2	-110.4	1.75001	3.97506	2.06363	1.735	0.409941	0	0	0	0	0	0	0.338884	low
423	415	PC-5p-64255_16	TGGCAAAGTTCTCAAGACAGCG	22	11	-	75694889	75695034	gataccttgcccatcctagccttttgtaatatccttgccccatgTGGCAAAGTTCTCAAGACAGCGtttgactgtgagtaattggcTGTCTTGACAACTTTACCACAcggggcaaggatattacaaaaggctaggacgggcagggt	0						5'	New	gp4	...(((((((((.((((((((((((((((((((((((((((.(((((.((((((.((((((((((.....((.....)).....)))))))))).)))))).))))).)))))))))))))))))))))))))))).)))))))))	143	47.9	-104.4	1.75001	5.30008	1.03181	5.20499	2.45964	2.55272	0.770496	2.15502	1.73352	6.0857	2.48129	2.71107	low
336	328	PC-3p-29405_49	CTCTGCCCGCTCTCTGTCT	19	11	-	76498870	76498940	actagactctgggtcctcagggggaggctttccaatgtacctcttcttcCTCTGCCCACTCTCTGTCTtnn	0						3'	New	gp4	...((((...((((...((((((((((.................))))))))))...))))...))))...	65	52.1	-19.8	5.25002	3.31255	5.15907	4.33749	3.68947	5.10545	2.69674	1.43668	2.1669	0	2.17113	2.71107	low
52	70	ssc-miR-186_L-5	AATTCTCCTTTTGGGCTT	18	11	+	80651548	80651634	cataactttctcaagaaAATTCTCCTTTTGGGCTTtaaacactccaggcctagccttagccaaaaggcgaatatttggaaagtttct	11	ssc-mir-186,bta-mir-186,eca-mir-186,cfa-mir-186,hsa-mir-186,mml-mir-186,cgr-mir-186,mmu-mir-186,rno-mir-186,mdo-mir-186,oan-mir-186,	ssc-mir-186	tgcttataactttcCAAAGAATTCTCCTTTTGGGCTTtatgattttattttaagcccaaaggtgaattttttgggaagtttg	ssc-miR-186	CAAAGAATTCTCCTTTTGGGCTT	5'	Diff	gp2	...(((((((.((((...((((.((((((((.((...........((((...)))).)))))))))).)))).)))))))))))...	81	39.1	-24	10.5	13.2502	17.0249	8.67499	25.8263	7.65817	49.3118	46.692	29.9032	76.5784	32.5669	6.43879	middle
324	316	PC-5p-397052_2	CGTGGTCCTAAGCCAGGGA	19	11	+	81157270	81157336	aaCGTGGTCCAAAGCCAGGGAcggagaggcacaggtgggtggagaagtcccagtgagggaccactga	0						5'	New	gp4	...(((((((...((..(((((.......(((......))).....))))).))...)))))))...	61	61.2	-25.7	0	0	0	3.46999	0	0	0	0	0	0	0	0	low
417	409	PC-5p-39854_32	GGGGCTGGGCGCGCGCCGC	19	11	+	81564808	81564870	gagaGGGGCCGGGCGCGCGCCGCagtcccgaccggcttcttcggcgcgagtcttccacctgcc	0						5'	New	gp4	...(((((..((((.(((((((.((..((....))...)).))))))).)))).)).)))...	57	76.2	-28.5	1.75001	3.97506	3.09544	1.735	0.819882	12.7636	3.85248	2.15502	2.60028	0	1.24064	0	middle
369	361	PC-5p-266360_2	GGTGGCAGCTGATCTCTGAG	20	11	+	85799395	85799463	GGTGGCAGCTGATCTCTGAGcaagaccgtggaggccagaggccgaggctggttcaggacggctgccnnn	0						5'	New	gp4	...((((((((.((.((((((.((.((.....((((...))))..)))).))))))))))))))))...	63	63.8	-34.5	3.50002	0	0	0	0	0	0	0	0	0	0	0	low
301	293	PC-5p-46533_26	CGTCCCCGCCCCTTGCCTC	19	11	+	86266175	86266232	agCGTCCCCGCCCCTTGCCCCctcacagacaggagacccaaggccggcggtggaccag	0						5'	New	gp4	...((((((((((((((....(((........)))...)))))..))))).))))...	52	72.4	-24.1	0	1.32502	4.12725	2.6025	1.63976	2.55272	0.385248	0	0	0.507142	0	1.01665	low
157	149	PC-3p-452857_2	CAAGTGACCTACCCATGT	18	12	+	11569	11682	caatgttttatagattgattgattgatattgggtgtagttggttacaacggtgtaccaattccggctgcaccgcCAAGTGACCTACACATGTatctacagtctgtttctcacgt	0						3'	New	gp4	..((((...((((((((.......(((((...(((((...((((((..(((((((((......)).)))))))....)))))))))))..)))))..)))))))).....))))	112	42.1	-35	0	0	0	5.20499	0	0	0	0	0	0	0	0	low
78	101	ssc-miR-338_R-1	TCCAGCATCAGTGATTTTGTT	21	12	+	1507083	1507163	gccgtcctccccAACAATATCCTGGTGCTGAGTgatgacacacgcaacTCCAGCATCAGTGATTTTGTTgaagagggcagc	14	ssc-mir-338,bta-mir-338,eca-mir-338,cfa-mir-338,hsa-mir-338,ptr-mir-338,ppy-mir-338,ggo-mir-338,mml-mir-338,cgr-mir-338,mmu-mir-338,rno-mir-338,mdo-mir-338,sha-mir-338,	ssc-mir-338	ccgtcctccccaacaatatcctggtgctgagtgatgacacacgcaacTCCAGCATCAGTGATTTTGTTGaagagggcag	ssc-miR-338	TCCAGCATCAGTGATTTTGTTG	3'	Diff	gp2	((.((((((..((((((.(((((((((((((((..((.....))..))).))))))))).))).))))))..)))))).))	81	53.1	-38.6	8.75004	10.6002	3.09544	12.145	0.819882	14.04	12.3279	1.43668	0.86676	8.11426	4.34225	5.42214	middle
215	207	PC-3p-124858_6	GCTTGGGGCCTCTGCCTGCT	20	12	-	2546651	2546772	agtgaggaaatgggctccaggcagtaaggggcactcaggctcggactgcgggtcggctgagacccagcctgtcatctgtACTTGGGGCCTCTGCCTGCTgcctacctgctcggagcctctcg	0						3'	New	gp4	...((((...(((((...((((((((((((((.((((((..((((..(((((..((.......))..)))))..))))..))))))))))))...))))))))....)))))...))))...	116	63.9	-58.4	1.75001	0	0	0	0	1.27636	0	0	2.60028	0	3.10161	0	low
462	454	PC-3p-109469_7	AGAAGCTTCCGTCCTCCTTGGT	22	12	-	4051322	4051440	ggagccacggcccagagcgccctgttctcacgaaggaggctggcttccctggaggcccctcttccAGAAGCTTCCGTCCTCCTTGGTgagagcggagagccatgggggctgatggtnnn	0						3'	New	gp4	...((((((((((...((...((((((((((.(((((((..((((((..((((((.....)))))))))))).....))))))).))))))))))...)).....)))))).))))...	113	63.9	-62.1	3.50002	3.97506	2.06363	0	1.63976	1.27636	0	0	1.73352	0	1.86097	0	low
9	11	ssc-miR-24-3p_R-3_1ss19AG	TGGCTCAGTTCAGCAGGAG	19	12	-	5218811	5218878	cttccttctgcaagtacctttggaggcgggagtgtttcccgcccaTGGCTCAGCTCAGCAGGAGgcct	20	ssc-mir-24-1,ssc-mir-24-2,bta-mir-24-2,bta-mir-24-1,eca-mir-24-1,cfa-mir-24-1,cfa-mir-24-2,hsa-mir-24-2,ptr-mir-24-1,mml-mir-24-2,cgr-mir-24,mmu-mir-24-1,mmu-mir-24-2,rno-mir-24-2,mdo-mir-24-2,mdo-mir-24-1,sha-mir-24-2,sha-mir-24-1,oan-mir-24-1,oan-mir-24-2,	ssc-mir-24-2	gacccgccctccgGTGCCTACTGAGCTGATATCAGTtctcattttacacacTGGCTCAGTTCAGCAGGAACAGgagtcga	ssc-miR-24-3p	TGGCTCAGTTCAGCAGGAACAG	3'	Diff	gp2	...((((((((.(((.((..(((..(((((((...)))))))))).))....)))..))))))))...	62	60.3	-27.1	2.62501	3.97506	4.12725	4.33749	5.32923	1.91454	1.54099	1.79585	0.86676	1.01428	0.310161	1.35553	low
87	79	PC-5p-41257_31	GGGAGTGATGAAAAAAGGAT	20	12	-	9055543	9055651	gaccttccagggggaaGGGAGTGATGATAAAAGGATaaaggaggaattcaaagtggaagtccatcataccgcccagctgtctccactgcatcctgacccctgttagtaa	0						5'	New	gp4	...((..((((((..((((((((..((((...((......(((((.(((......))).))).))......))....))))..))))...))))..))))))..))...	103	49.5	-35.1	0	1.32502	4.12725	3.46999	0.819882	0	0.770496	10.0567	5.20056	0	1.86097	2.0333	middle
388	380	PC-3p-97757_8	ACGCTGGATGTCTCCCTCTAGA	22	12	+	21042837	21042897	gacctgggggggaagccagaatcaggattgtccgttgACACTGGATGTCTCCCTCTAGAac	0						3'	New	gp4	...((((((((((..((((..(((((.....))..)))..))))...)).))))))))...	55	55.7	-24.6	0	0	0	0	0	1.27636	0.770496	3.59169	0	2.02857	1.86097	0.677767	low
103	95	PC-3p-29428_49	GGAGCGGGCGGGCGGTCC	18	12	+	22357131	22357237	ccggaggcccgggcccaggggtccgcacgcagttcgtggccttgaccctgacgtcagcccaggctgcaGGAGCGGGCGGGCGGTCCatcgcaggcccgggcctctgt	0						3'	New	gp4	.((((((((((((((..((((.((((.(((.(((((..((((((((......))))....))))..)..))))..))).)))).)).))...)))))))))))))).	105	75.7	-68.2	8.75004	11.9252	11.3499	34.6999	12.2982	29.3563	10.0164	3.59169	4.3338	3.04285	4.34225	2.0333	middle
29	25	PC-3p-73621_13	TGAAAGGACGTAAAACAGGCCC	22	12	+	23440139	23440212	caaggcctgtttcacgtcctcccacccaggttcatagaaaaaactaggTGAAAGGACGTAAAACAGGCCCcgat	0						3'	New	gp4	...(((((((((.(((((((..((((.((..............)).))))..))))))).))))))))).....	66	50	-34.8	7.00003	3.97506	1.03181	1.735	3.68947	1.91454	3.46723	4.6692	3.90042	1.01428	1.24064	1.69442	low
52	44	PC-5p-25938_59	TTTACGTCCTTTCATCTAGT	20	12	-	23440170	23440243	tcggggcctgtTTTACGTCCTTTCACCTAGTtttttctatgaaCCTGGGTGGGAGGACGTGAAACaggccttgg	0						5'	New	gp4	.(..(((((((((((((((((..(((((((.(((......))).)))))))..)))))))))))))))))..).	72	51.4	-51.8	8.75004	2.65004	11.3499	11.2775	25.8263	45.3109	1.54099	3.59169	3.46704	2.53571	8.99467	9.82762	middle
52	45	PC-3p-94931_9	ACTGGGTGGGAGGACGTGAAAC	22	12	-	23440170	23440243	tcggggcctgtTTTACGTCCTTTCACCTAGTtttttctatgaaCCTGGGTGGGAGGACGTGAAACaggccttgg	0						3'	New	gp4	.(..(((((((((((((((((..(((((((.(((......))).)))))))..)))))))))))))))))..).	72	51.4	-51.8	10.5	2.65004	0	5.20499	4.50935	5.74363	1.54099	1.07751	0.43338	0	1.24064	0	middle
357	349	PC-5p-14070_136	TTTACGTCCTTTCATCTAGTTT	22	12	-	23443890	23443964	tcggggcctgtTTTACGTCCTTTCACCTAGTTTttttctatgaaactgggtgggaggatgtgaaacaggccttgg	0						5'	New	gp4	.(..(((((((((((((((((..(((((((((((.......)))))))))))..)))))))))))))))))..).	73	48	-53.7	7.00003	3.97506	10.3181	11.2775	70.0999	72.1145	3.08198	3.59169	5.20056	2.53571	7.1337	11.8609	middle
41	55	hsa-miR-152-5p	AGGTTCTGTGATACACTCCGACT	23	12	-	24289495	24289584	ccgctgtcctcccggcccAGGTTCTGTGATACACTCCGACTcgggctctggagcagTCAGTGCATGACAGAACTTGGgcccggacggacc	22	ssc-mir-152,ssc-mir-148b,bta-mir-152,bta-mir-148b,oar-mir-152,eca-mir-148b,cfa-mir-152,cfa-mir-148b,hsa-mir-152,hsa-mir-148b,ptr-mir-152,ptr-mir-148b,ppy-mir-152,ggo-mir-152,ggo-mir-148b,cgr-mir-152,cgr-mir-148b,mmu-mir-152,mmu-mir-148b,rno-mir-152,rno-mir-148b,mdo-mir-152,	hsa-mir-152	tgtcccccccggcccAGGTTCTGTGATACACTCCGACTcgggctctggagcagTCAGTGCATGACAGAACTTGGgcccggaaggacc	hsa-miR-152-5p	AGGTTCTGTGATACACTCCGACT	5'	Yes	gp2	.....(((((((.((((((((((((((.((.((((..((((...(((....))))))))))).)).)))))))))))))).))).)))).	84	64.4	-49.9	7.00003	14.5752	12.3818	6.93999	10.6585	1.27636	44.6888	21.5502	19.9355	60.857	18.6097	21.6885	middle
41	56	ssc-miR-152	TCAGTGCATGACAGAACTTGG	21	12	-	24289495	24289584	ccgctgtcctcccggcccAGGTTCTGTGATACACTCCGACTcgggctctggagcagTCAGTGCATGACAGAACTTGGgcccggacggacc	22	ssc-mir-152,ssc-mir-148b,bta-mir-152,bta-mir-148b,oar-mir-152,eca-mir-148b,cfa-mir-152,cfa-mir-148b,hsa-mir-152,hsa-mir-148b,ptr-mir-152,ptr-mir-148b,ppy-mir-152,ggo-mir-152,ggo-mir-148b,cgr-mir-152,cgr-mir-148b,mmu-mir-152,mmu-mir-148b,rno-mir-152,rno-mir-148b,mdo-mir-152,	ssc-mir-152	cggcccaggttctgtgatacactccgactcgggctctggagcagTCAGTGCATGACAGAACTTGGgcccggacggacctt	ssc-miR-152	TCAGTGCATGACAGAACTTGG	3'	Yes	gp2	.....(((((((.((((((((((((((.((.((((..((((...(((....))))))))))).)).)))))))))))))).))).)))).	84	64.4	-49.9	1200.51	930.827	554.084	712.216	464.463	312.071	941.161	826.09	685.607	1128.9	606.055	848.225	middle
451	443	PC-5p-125377_6	TCCTGAAGGTTAGGCGTTC	19	12	+	24304755	24304873	ttccctccatttcttggcctTCCTGAAGGTTAGGCTTTCcctggccccaggccttcactactccctttaggggccaggggtgggtcagctctaggggcccaggctgggtatgggggagg	0						5'	New	gp4	(((((.((((..((..((((((((...((((.(((..((((((((((((((............)))...)))))))))))...)))))))...))))...))))..)).))))))))).	118	62.2	-58.5	0	0	0	15.615	0	0	0	0	0	0	0	0	middle
4	5	ssc-miR-10a-5p	TACCCTGTAGATCCGAATTTGT	22	12	-	24791301	24791393	atctgtcttctgtataTACCCTGTAGATCCGAATTTGTgtaaggaattttgtggtcaCAAATTCGTATCTAGGGGAATatgtagttgacataa	31	ssc-mir-10a,ssc-mir-10b,bta-mir-10a,bta-mir-10b,oar-mir-10b,eca-mir-10a,eca-mir-10b,cfa-mir-10a,cfa-mir-10b,hsa-mir-10a,hsa-mir-10b,ppa-mir-10a,ptr-mir-10a,ptr-mir-10b,ppy-mir-10a,ppy-mir-10b,ggo-mir-10b,mml-mir-10a,mne-mir-10b,age-mir-10a,cgr-mir-10a,cgr-mir-10b,mmu-mir-10a,mmu-mir-10b,rno-mir-10b,mdo-mir-10a,mdo-mir-10b,sha-mir-10a,sha-mir-10b,oan-mir-10a,oan-mir-10b,	ssc-mir-10a	tctgtataTACCCTGTAGATCCGAATTTGTgtaaggaattttgtggtcaCAAATTCGTATCTAGGGGAATatgtagttga	ssc-miR-10a-5p	TACCCTGTAGATCCGAATTTGT	5'	Yes	gp2	...((((..((..((((.((((.(((((.((((((((((................)))))))))).))))))))).))))..))..))))...	87	35.5	-32	5086.4	4142.02	8853.47	6823.74	3359.87	2530.39	11409.9	8814.38	8292.3	17071.9	6398.93	4280.78	high
4	6	ssc-miR-10a-3p	CAAATTCGTATCTAGGGGAAT	21	12	-	24791301	24791393	atctgtcttctgtataTACCCTGTAGATCCGAATTTGTgtaaggaattttgtggtcaCAAATTCGTATCTAGGGGAATatgtagttgacataa	31	ssc-mir-10a,ssc-mir-10b,bta-mir-10a,bta-mir-10b,oar-mir-10b,eca-mir-10a,eca-mir-10b,cfa-mir-10a,cfa-mir-10b,hsa-mir-10a,hsa-mir-10b,ppa-mir-10a,ptr-mir-10a,ptr-mir-10b,ppy-mir-10a,ppy-mir-10b,ggo-mir-10b,mml-mir-10a,mne-mir-10b,age-mir-10a,cgr-mir-10a,cgr-mir-10b,mmu-mir-10a,mmu-mir-10b,rno-mir-10b,mdo-mir-10a,mdo-mir-10b,sha-mir-10a,sha-mir-10b,oan-mir-10a,oan-mir-10b,	ssc-mir-10a	tctgtataTACCCTGTAGATCCGAATTTGTgtaaggaattttgtggtcaCAAATTCGTATCTAGGGGAATatgtagttga	ssc-miR-10a-3p	CAAATTCGTATCTAGGGGAAT	3'	Yes	gp2	...((((..((..((((.((((.(((((.((((((((((................)))))))))).))))))))).))))..))..))))...	87	35.5	-32	56.0003	55.6509	62.9406	58.9899	47.5531	21.6982	55.4757	54.5937	52.8724	63.8998	41.5616	60.3213	middle
184	176	PC-3p-56915_19	TTCGCTGTGATGATGGAG	18	12	-	32170404	32170485	ctggagtctcttcatgggaaagaaactcccctcaatgtagacctgggcaaattttgtTTCCCTGTGATGATGGAGgctctct	0						3'	New	gp4	..(((((((((((((((((((.(((...(((.............))).....))).)))))).))))....)))))))))..	78	47.6	-26.9	3.50002	6.6251	1.03181	8.67499	4.91929	2.55272	0	2.15502	0	0	0	0	low
37	49	ssc-miR-142-5p	CATAAAGTAGAAAGCACTACT	21	12	+	36203900	36204011	gacggacagacagacagtgcagtcaccCATAAAGTAGAAAGCACTACTaacagcactggagggTGTAGTGTTTCCTACTTTATGGAtgagtgtactgtgggcttcggagacc	13	ssc-mir-142,bta-mir-142,eca-mir-142,cfa-mir-142,ptr-mir-142,ggo-mir-142,cgr-mir-142,mmu-mir-3964,mmu-mir-142b,mmu-mir-3969,mdo-mir-142,sha-mir-142,oan-mir-142,	ssc-mir-142	gtgcagtcaccCATAAAGTAGAAAGCACTACTaacagcactggagggTGTAGTGTTTCCTACTTTATGGatgagtgtact	ssc-miR-142-5p	CATAAAGTAGAAAGCACTACT	5'	Yes	gp2	..(((..((....((((((((.(((.(((((((((((.(((((((((...((....))......))))))))).))))))))))).))).))))))))...)))))......	104	49.1	-45.2	315533	423772	312088	271668	379709	297319	279314	292512	306509	240417	285113	371359	high
37	50	ssc-miR-142-3p_R+1	TGTAGTGTTTCCTACTTTATGGA	23	12	+	36203900	36204011	gacggacagacagacagtgcagtcaccCATAAAGTAGAAAGCACTACTaacagcactggagggTGTAGTGTTTCCTACTTTATGGAtgagtgtactgtgggcttcggagacc	13	ssc-mir-142,bta-mir-142,eca-mir-142,cfa-mir-142,ptr-mir-142,ggo-mir-142,cgr-mir-142,mmu-mir-3964,mmu-mir-142b,mmu-mir-3969,mdo-mir-142,sha-mir-142,oan-mir-142,	ssc-mir-142	gtgcagtcaccCATAAAGTAGAAAGCACTACTaacagcactggagggTGTAGTGTTTCCTACTTTATGGatgagtgtact	ssc-miR-142-3p	TGTAGTGTTTCCTACTTTATGG	3'	Diff	gp2	..(((..((....((((((((.(((.(((((((((((.(((((((((...((....))......))))))))).))))))))))).))).))))))))...)))))......	104	49.1	-45.2	134454	126098	70544.5	105351	122927	133178	71868	55146.5	71321.4	53099.8	71412.1	113789	high
73	94	cgr-miR-301a-5p	GCTCTGACTTTATTGCACTACT	22	12	+	37079083	37079172	atactgctaacaaatGCTCTGACTTTATTGCACTACTgtactttacagctagCAGTGCAATAGTATTGTCAAAGCatctgagagcagaat	15	ssc-mir-301,bta-mir-301a,bta-mir-301b,eca-mir-301a,eca-mir-301b,cfa-mir-301a,cfa-mir-301b,hsa-mir-301b,ptr-mir-301b,cgr-mir-301a,mmu-mir-301a,mmu-mir-301b,rno-mir-301a,rno-mir-301b,oan-mir-301,	cgr-mir-301a	gctcgcgaatGCTCTGACTTTATTGCACTACTgtactttacagctagCAGTGCAATAGTATTGTCAAAGCatccgaaag	cgr-miR-301a-5p	GCTCTGACTTTATTGCACTACT	5'	Yes	gp2	...(((((..((.(((((.((((.((((((((((.(((((...))))).....))))))))))....)))).))))).))..)))))...	84	37.8	-32.4	21.0001	27.8254	54.6861	43.3749	31.9754	34.4618	70.8856	54.5937	39.871	86.2141	35.9787	33.8884	middle
73	95	ssc-miR-301_1ss5CG	CAGTGCAATAGTATTGTCAAAGC	23	12	+	37079083	37079172	atactgctaacaaatGCTCTGACTTTATTGCACTACTgtactttacagctagCAGTGCAATAGTATTGTCAAAGCatctgagagcagaat	15	ssc-mir-301,bta-mir-301a,bta-mir-301b,eca-mir-301a,eca-mir-301b,cfa-mir-301a,cfa-mir-301b,hsa-mir-301b,ptr-mir-301b,cgr-mir-301a,mmu-mir-301a,mmu-mir-301b,rno-mir-301a,rno-mir-301b,oan-mir-301,	ssc-mir-301	gctaacaaatgctctgactttattgcactactgtactttacagctacCAGTCCAATAGTATTGTCAAAGCatctgagagcag	ssc-miR-301	CAGTCCAATAGTATTGTCAAAGC	3'	Diff	gp2	...(((((..((.(((((.((((.((((((((((.(((((...))))).....))))))))))....)))).))))).))..)))))...	84	37.8	-32.4	11459.1	9756.13	14693	15628.9	12843.4	8213.39	13351.2	16276.1	13622.9	15987.1	13090.7	10559.6	high
248	240	PC-5p-8695_263	ACCCGAAAGATGGTGAACT	19	12	-	39469502	39469588	ttatcctgtacaccACCCGAAAGATGGTGAGCTagagtgtccgtgcctactgaagcttctcaaaatcatgcatgggtgacaggaaag	0						5'	New	gp4	...((((((....((((((...(((..((((...(((..((.((....)).))..)))))))..))).....))))))))))))...	81	48.3	-25.2	50.7502	64.926	45.3998	57.2549	48.373	93.1744	44.6888	17.2401	19.9355	25.3571	35.3584	8.81097	middle
339	331	PC-3p-227681_3	ACCTTGGGCTTGGTTGGCC	19	12	+	46180210	46180286	ggtggggctggcccagcctggggcttccctgtgttactgagcacaggcctcctACCCTGGGCTTGGTTGGCCtcctg	0						3'	New	gp4	((.(((((..(((.((((..(((....((((((((....)))))))).......)))..)))).)))..))))))).	76	67.5	-45.7	0	0	0	5.20499	0	0	0	0	0	0	0	0	low
207	199	PC-5p-209083_3	GTATCTGATGCATGTTTCC	19	12	+	46922880	46923031	gcttcacatggtggagatctgctctggccgctcgctcacagctttcacaggtgGTATCTGATGCATGTTTCCttccacaatcccaggattgaatatgtaacagtgactccagaaggattccggtaccggggccaaatcttccccactgtgaa	0						5'	New	gp4	..(((((((((.((((((..(((((((..((.((.......(((((...((.(((..(((.(((((((((...(((.........)))..))))))))).)))..))))).)))))....)))).)))))))...)))))).))).))))))	150	51.3	-48.5	0	0	0	5.20499	0	0	0	0	0	0	0	0	low
148	140	PC-5p-95154_9	TGGGGGTGGCGAGCAAACCGTT	22	12	+	47177104	47177194	cagggcactTGGGGGTGGCGAGCAAACCGTTaccattactgagtttagtaatggtaacggttctcttgctgcacccagaaaacgtgccaag	0						5'	New	gp4	...((((((((((.(..(((((..(((((((((((((((((....)))))))))))))))))..)))))..).))))).....)))))...	85	51.6	-52.3	1.75001	0	1.03181	0	0.819882	1.27636	0	2.87336	4.3338	0	1.86097	8.1332	low
83	106	ssc-miR-423-5p	TGAGGGGCAGAGAGCGAGACTTT	23	12	-	48286951	48287097	gaagtttgagggagaaacttgtgaggaaataaagaaagttaggcTGAGGGGCAGAGAGCGAGACTTTtctattttccaaaAGCTCGGTCTGAGGCCCCTCAGTcttgcttcctaccccgcgcttgagtttctccccggttggatgct	11	ssc-mir-423,bta-mir-423,eca-mir-423,cfa-mir-423a,hsa-mir-423,ptr-mir-423,ppy-mir-423,ggo-mir-423,cgr-mir-423,mmu-mir-423,rno-mir-423,	ssc-mir-423	aagttaggcTGAGGGGCAGAGAGCGAGACTTTtctattttccaaaAGCTCGGTCTGAGGCCCCTCAGTcttgcttcctac	ssc-miR-423-5p	TGAGGGGCAGAGAGCGAGACTTT	5'	Yes	gp2	...(((..(((((((((((((((.((......((.(((..((((((((((((..(((.((((.(((((.........))))))))).)))...))))))))))))..))).))...)).)))..)))))))))))...)..)))...	141	50.3	-63.2	10325	12362.4	11972.1	9566.78	14507	10449.6	14560.8	18916.7	17088.2	16922.3	12575.2	11795.9	high
83	107	ssc-miR-423-3p	AGCTCGGTCTGAGGCCCCTCAGT	23	12	-	48286951	48287097	gaagtttgagggagaaacttgtgaggaaataaagaaagttaggcTGAGGGGCAGAGAGCGAGACTTTtctattttccaaaAGCTCGGTCTGAGGCCCCTCAGTcttgcttcctaccccgcgcttgagtttctccccggttggatgct	11	ssc-mir-423,bta-mir-423,eca-mir-423,cfa-mir-423a,hsa-mir-423,ptr-mir-423,ppy-mir-423,ggo-mir-423,cgr-mir-423,mmu-mir-423,rno-mir-423,	ssc-mir-423	aagttaggcTGAGGGGCAGAGAGCGAGACTTTtctattttccaaaAGCTCGGTCTGAGGCCCCTCAGTcttgcttcctac	ssc-miR-423-3p	AGCTCGGTCTGAGGCCCCTCAGT	3'	Yes	gp2	...(((..(((((((((((((((.((......((.(((..((((((((((((..(((.((((.(((((.........))))))))).)))...))))))))))))..))).))...)).)))..)))))))))))...)..)))...	141	50.3	-63.2	7855.79	7816.3	15052.1	9797.53	12139.2	9983.71	15531.7	15590.1	16454.6	17631.8	13383.1	9961.48	high
413	405	PC-3p-8813_258	TTTGGTCTTTTCTCCTTGGCAGT	23	12	-	49756055	49756119	tTGGCGAGGGAGAAATGCTAAACTcttcatacaagcatacgTTTGGTCTTTTCTCCTTGGCAGAc	0						3'	New	gp4	...((.(((((((((.(((((((.................)))))))..))))))))).))....	58	44.6	-21.9	19.2501	45.0507	33.018	20.82	37.7146	24.2509	36.2133	47.4104	47.6718	38.5428	45.9038	48.7992	middle
267	259	PC-3p-28940_51	TCACCCACCCCCTTCCCTCCAGT	23	12	-	49787287	49787359	tgaggcggggaggggtggcaagggggccgtgtgggcacagagggcaggccTCACCCACCCCCTTCCCTCCAGC	0						3'	New	gp4	...((.((((((((((((....((((((.(((...........)))))))))..))).))))))))).))...	67	74	-38.5	8.75004	2.65004	17.5408	8.67499	4.91929	2.55272	4.62298	3.59169	1.73352	19.2714	10.5455	14.9109	middle
33	44	hsa-miR-132-5p	ACCGTGGCTTTCGATTGTTACT	22	12	-	50015674	50015759	ccgcccccgcgtctccagggcaACCGTGGCTTTCGATTGTTACTgtgggaaccggaggTAACAGTCTACAGCCATGGTCGccccgc	9	ssc-mir-132,bta-mir-132,eca-mir-132,cfa-mir-132,hsa-mir-132,cgr-mir-132,mmu-mir-132,rno-mir-132,mdo-mir-132,	hsa-mir-132	ccgcccccgcgtctccagggcaACCGTGGCTTTCGATTGTTACTgtgggaactggaggTAACAGTCTACAGCCATGGTCGccccgcagcacgcccacgcgc	hsa-miR-132-5p	ACCGTGGCTTTCGATTGTTACT	5'	Yes	gp2	........(((......((((.(((((((((...((((((((((.(((...)))..))))))))))...))))))))).)))))))	78	64	-39	171.501	221.279	43.3361	53.7849	114.783	109.767	121.738	114.934	81.4755	103.457	101.113	61.6768	middle
33	45	ssc-miR-132	TAACAGTCTACAGCCATGGTCG	22	12	-	50015674	50015759	ccgcccccgcgtctccagggcaACCGTGGCTTTCGATTGTTACTgtgggaaccggaggTAACAGTCTACAGCCATGGTCGccccgc	9	ssc-mir-132,bta-mir-132,eca-mir-132,cfa-mir-132,hsa-mir-132,cgr-mir-132,mmu-mir-132,rno-mir-132,mdo-mir-132,	ssc-mir-132	ctccagggcaaccgtggctttcgattgttactgtgggaaccggaggTAACAGTCTACAGCCATGGTCGccccgcagca	ssc-miR-132	TAACAGTCTACAGCCATGGTCG	3'	Yes	gp2	........(((......((((.(((((((((...((((((((((.(((...)))..))))))))))...))))))))).)))))))	78	64	-39	1055.25	1370.07	266.208	282.805	660.825	617.759	541.659	524.387	396.976	406.728	460.899	451.393	middle
86	110	ssc-miR-497	CAGCAGCACACTGTGGTTTGT	21	12	+	54717012	54717099	ccccagtcctgctcccgcccCAGCAGCACACTGTGGTTTGTacggcactgtggccacgtcCAAACCACACTGTGGTGTTAGAgcgagg	12	ssc-mir-497,bta-mir-497,eca-mir-497,cfa-mir-497,hsa-mir-497,ptr-mir-497,ppy-mir-497,ggo-mir-497,cgr-mir-497,mmu-mir-497a,mdo-mir-497,sha-mir-497,	ssc-mir-497	cccgcccCAGCAGCACACTGTGGTTTGTacggcactgtggccacgtccaaaccacactgtggtgttagagcgagggtggg	ssc-miR-497	CAGCAGCACACTGTGGTTTGT	5'	Yes	gp2	.............(((((...((((.((((.(((((((((.(((((......)))..)).))))))))).)))).))))...))).))	75	62.5	-33.7	117.251	80.8263	71.1951	178.705	175.455	165.927	86.2956	74.7072	131.748	96.3569	98.0109	159.275	middle
434	426	PC-3p-54980_20	TTAATCCGTCGGTGCCCCTCAGT	23	12	-	55856722	55856822	gaaggggggcacggatggatggacagacggatgggcggagccctcgctgcggggccgagggctccagggcctggatcTTAATCCGTCGGTGCCCCTCAGGt	0						3'	New	gp4	...(((((((((.(((((((....(((.....((((((((((((((((....)).))))))))))...))))...)))..))))))).)))))))))....	94	69.3	-59.5	3.50002	2.65004	1.03181	3.46999	1.63976	2.55272	3.08198	7.18339	4.3338	5.07142	6.20322	0.677767	low
112	104	PC-5p-5140_535	GCATCCAGCTTGTCCTCGCTGT	22	12	-	62507653	62507709	aGCATCCAGCTTGTCCTCGCTGTtgtcattaaacggagcggggcacaggcgggacct	0						5'	New	gp4	....(((.((((((((((((((((.......)))..))))))).)))))).)))...	50	59.6	-24.5	29.7501	11.9252	43.3361	32.9649	17.2175	15.3163	77.8201	96.9757	73.6746	106.5	109.797	50.1548	middle
277	269	PC-5p-181853_3	AAGTCCTCGGATGGCTCGGATA	22	12	+	63163194	63163290	cctgctgtgtgttcttgacAAGTCCTCGGATGGCTCGGATCtgcagaggtgggcagatccccgccctgggggctgtcctcacgaccccgcatgcatc	0						5'	New	gp4	..(((((((.(((...(((.(((((((((..(((..((((((((........))))))))..))))))))))))))).....)))..)))).)))..	93	63.9	-41.8	0	0	0	0	0	0	0	1.43668	3.46704	0	0	0	low
374	366	PC-3p-152530_4	CGATCCTTTAGTCCCTCG	18	13	-	8144289	8144369	cacagggacgaaagaggcaaagaattttgagattaatggaaagaactccactttgatctggtCGCTCCTTTAGTCCCTCGg	0						3'	New	gp4	...((((((.((((..((...((......(((((((((((......))))..)))))))..))))..)))).))))))...	75	45.7	-23.7	0	0	0	12.145	0	0	0.770496	0	0	0	0	0	middle
32	43	ssc-miR-128	TCACAGTGAACCGGTCTCTTT	21	13	+	22859188	22859271	tgtgcagtgggaaggggggccgaggcactgtccgagagtgagtagcaggtcTCACAGTGAACCGGTCTCTTTccctactgtgtc	17	ssc-mir-128-2,ssc-mir-128-1,bta-mir-128-2,eca-mir-128-2,eca-mir-128-1,cfa-mir-128-1,cfa-mir-128-2,hsa-mir-128-2,ptr-mir-128-2,ggo-mir-128,cgr-mir-128,mmu-mir-128-2,rno-mir-128-2,mdo-mir-128a,sha-mir-128,oan-mir-128-1,oan-mir-128-2,	ssc-mir-128-1	tgagctgttggattcggggccgtagcactgtctgagaggtttacatttcTCACAGTGAACCGGTCTCTTTttcagctgcttc	ssc-miR-128	TCACAGTGAACCGGTCTCTTT	3'	Yes	gp2	.(..(((((((.(..(((((((...((((((..((((.((.....))..))))))))))...)))))))..).)))))))..).	82	59.5	-38.1	3954.14	5345.13	6660.35	6027.38	6316.37	5270.74	6413.22	6293.01	5113.02	5514.66	5823.58	6257.82	middle
10	12	hsa-miR-26a-1-3p	CCTATTCTTGGTTACTTGCACG	22	13	-	24885212	24885280	cctcGTTCAAGTAACCCAGGATAGGCTgtgcaggtcccaaggggCCTATTCTTGGTTACTTGCACGcgg	9	bta-mir-26a-1,eca-mir-26a-2,cfa-mir-26a-1,hsa-mir-26a-1,mne-mir-26a,mmu-mir-26a-1,rno-mir-26a,mdo-mir-26-3,oan-mir-26-1,	hsa-mir-26a-1	gtggcctcgTTCAAGTAATCCAGGATAGGCTgtgcaggtcccaatgggCCTATTCTTGGTTACTTGCACGgggacgc	hsa-miR-26a-1-3p	CCTATTCTTGGTTACTTGCACG	3'	Yes	gp2	((.(((.(((((((((.(((((((((.........((....))))))))))).))))))))).))).))	69	56.5	-32.6	1.75001	2.65004	7.22269	1.735	3.27953	0	6.16397	2.15502	6.06732	2.02857	2.48129	6.77767	low
69	61	PC-5p-1218_4500	TTCAAGTAACCCAGGATAGGCTT	23	13	-	24885289	24885357	cctcgTTCAAGTAACCCAGGATAGGCTGtgcaggtcccaaggggcctattcttggttacttgcacgcgg	0						5'	New	gp4	((.(((.(((((((((.(((((((((.........((....))))))))))).))))))))).))).))	69	56.5	-32.6	355.252	279.579	673.774	602.044	484.55	250.167	642.594	577.544	593.731	848.955	602.953	808.576	middle
241	233	PC-5p-177884_3	TGCTGTGGCCTTTGTGCC	18	13	-	28486312	28486423	ttcacttcctgtccTGCTGTGGCCTTTGTGCCtcgtgcttatcatggcccctcacccaagggagatcctgccatcccagaagttctgtgactgaggcccagctgtcagtagt	0						5'	New	gp4	...(((..(((....((((.(((((..((((.....((((...(((((...((.((....)).))....))))).....))))...)).))..)))))))))...))).)))	109	56.2	-33.1	0	3.97506	0	0	0	0	0	0	0	0	0	0	low
326	318	PC-3p-83012_11	TCCTCCACGTTCCCGTGG	18	13	+	29217847	29217919	ggaatggatgccagaggcaggaaggcacccagtccaccacagggtcctTCCTGCACGTTCCCGTGGatctccc	0						3'	New	gp4	(((((((..((.....(((((((((.((((.((.....)).)))))))))))))..))..)))).....))).	72	63	-29.1	3.50002	1.32502	1.03181	1.735	1.63976	3.82909	0.770496	0.718339	0	2.02857	1.86097	0	low
85	77	PC-3p-81387_11	TGTGACTGTGGCCTAGGC	18	13	+	29868955	29869012	tgtggcttgtggtatttattccctggcagtgtggcaTGGGACTGTGGCCTAGGCtttg	0						3'	New	gp4	...((((((.(((...((.((((((.(.....).)).)))).))..)))))))))...	52	53.4	-18.4	0	0	1.03181	3.46999	4.09941	1.27636	0	0	0	0	1.86097	1.35553	low
183	175	PC-3p-96573_8	CACTGTGCTCCTTGCCTTTCAGT	23	13	-	34495349	34495413	gcagagagggaggggcacactgggaggggtcctggcctcagaCACTGTGCTCCTTGCCTTTCAGT	0						3'	New	gp4	...((((((((((((((((.((...(((((....)))))...)).)))))))))).))))))...	59	63.1	-34.2	0	3.97506	0	5.20499	0	0	0	0.718339	0.86676	1.01428	0	0.677767	low
7	8	PC-5p-38645_33	TGGCCCTAACACTTGGAGAGGC	22	13	+	35145745	35145833	gggcttataTGGCCCTAACACTTGGAGAGGCtgttatcaagggtaacagccttcgttaacagcCTCTCCAAGTGTTAGGGCCATGtnnn	0						5'	New	gp4	......((((((((((((((((((((((((((((((...(((((....)))))...))))))))))))))))))))))))))))))...	80	48.3	-62.8	5.25002	5.96259	3.09544	6.07249	13.1181	5.74363	3.85248	3.95086	3.90042	5.07142	4.34225	2.71107	middle
7	9	PC-3p-77033_12	CTCTCCAAGTGTTAGGGCCATA	22	13	+	35145745	35145833	gggcttataTGGCCCTAACACTTGGAGAGGCtgttatcaagggtaacagccttcgttaacagcCTCTCCAAGTGTTAGGGCCATGtnnn	0						3'	New	gp4	......((((((((((((((((((((((((((((((...(((((....)))))...))))))))))))))))))))))))))))))...	80	48.3	-62.8	2.62501	6.6251	2.06363	3.46999	4.09941	5.10545	2.31149	1.79585	2.60028	2.53571	2.79145	5.42214	low
111	137	ssc-mir-4332-p5_1ss19GT	CCACGGCCGCCGCCGGGCT	19	13	-	37287232	37287295	ctccCCAGGGCCGCCGCCGGGCTtggcagcctacactgccaagatggcagcggctaatgggagc	1	ssc-mir-4332,	ssc-mir-4332	cggcggggggtgtcgcgggggtgggcgggctggggccgggggtggggccggcgggggcacgacccccggtcggcgtcCACGGCCGCCGCCGGGCGCCtttccaccgc	ssc-mir-4332-p5	cCACGGCCGCCGCCGGGCG	5'	New	gp2	(((((...((((((.((((..((((((((......)))))))).)))).))))))...))))).	63	70.3	-42.7	3.50002	6.6251	0	1.735	1.63976	0	3.85248	0	2.60028	6.0857	1.24064	1.35553	low
162	154	PC-5p-343967_2	GCAGTGGTTCTTAGGCTGA	19	13	+	49462018	49462098	gaGCAGTGGTTCTTAGCCTGAggtctttgggtcactagatgtagtttattagggacccctagagggctgaatccactgaat	0						5'	New	gp4	...((((((...(((((((....(((..(((((.((..(((.....)))..)))))))..))))))))))..))))))...	75	48.1	-32.1	0	0	0	3.46999	0	0	0	0	0	0	0	0	low
95	87	PC-3p-122358_6	TCTGTCCACATATGGTGGTACT	22	13	-	55799857	55799950	actgttgagatcctcgttctgccaatgtgaagacagatctggcaatcacagtcacaaaTCTGTCCACATATGGTGGTACTtggatttgaaccct	0						3'	New	gp4	...(((.((((((..((.(..((((((((..(((((((.((((.......))))...)))))))))))).)))..).))..)))))).)))...	88	44.7	-35.1	0	0	1.03181	0	0	0	3.08198	0	0.86676	1.01428	0	1.35553	low
124	116	PC-3p-64893_16	TCAGACATTTGGTGTATGT	19	13	+	69781576	69781644	ttagaccaaattacaacccaatgcatgaaagataactTCAGACATTTGTTGTATGTaaatttggttact	0						3'	New	gp4	...((((((((((((((..((((..((((.......))))..)))).)))))).....))))))))...	63	30.4	-16.5	5.25002	2.65004	0	3.46999	5.73917	3.82909	3.08198	0	1.73352	0	3.72193	0	low
297	289	PC-5p-186072_3	AATGGAGAAATGACTGTT	18	13	-	79450522	79450609	agtgtgtgtgcAATGGAGAAATGACTGTTgtttgttttggaacttaaaactcccaattttcctttttccccaccctgctccacgcttt	0						5'	New	gp4	((((((...(((..(((((((.((..((((...((((((.....))))))...))))..)).)))))))......)))..))))))..	86	42	-21.3	0	3.97506	0	0	0	0	0	0	0	0	1.86097	0	low
484	476	PC-5p-19477_87	TGAGCAGTGATGAAATGGT	19	13	-	85213292	85213363	ccagTGAGCAGTGATGAAAGGGTatggttatgattattctgggacttttatacatattcttcaccttacttt	0						5'	New	gp4	..((((((..((((.(((...((((((((..((....))...))))...))))...))).))))))))))..	68	36.1	-16	15.7501	19.8753	3.09544	17.35	15.5778	12.7636	4.62298	2.15502	2.60028	5.07142	11.1658	11.522	middle
72	93	ssc-miR-296-3p_R-2	AGGGTTGGGCGGAGGCTTT	19	13	+	85772596	85772655	agagctggagcttctgcactgtctctgtcactattAGGGTTGGGCAGAGGCTTTggctgg	2	ssc-mir-296,bta-mir-296,	ssc-mir-296	gacccttccgGAGGGCCCCCCCCAATCCTGTtgtgctggattcagAGGGTTGGGCGGAGGCTTTCCtgaaggctctg	ssc-miR-296-3p	AGGGTTGGGCGGAGGCTTTCC	3'	Diff	gp2	..(((..((((((((((.((..(((((.......)))))..))))))))))))..)))..	56	55	-31.3	73.5003	63.601	161.995	109.305	126.262	82.9636	137.919	125.709	96.2104	120.7	119.102	87.432	middle
276	268	PC-3p-26988_56	ATGAATGGATGAACGAGATTT	21	13	-	87634889	87634954	ccagtgtcactgggttcattcactctgtaatctcaccattacagATGAATGGATGAAGGAGATTTg	0						3'	New	gp4	..(((.((.((..(((((((((.((((((((......)))))))))))))))))..)))).)))..	62	42.4	-22.3	8.75004	7.95013	2.06363	0	5.73917	7.65817	5.39347	6.46505	9.53436	1.01428	6.82354	6.0999	low
171	163	PC-3p-134619_5	CTGCGTCGGAGGGCGGCCGGA	21	13	+	90106626	90106686	caaccggccgctcccgacgcccgcagccacccggaggcCTGCGTCGGAGGGCGGCCGGAnn	0						3'	New	gp4	...(((((((((((((((((..((..((....))..))..))))))).))))))))))...	55	78.7	-43.6	0	1.32502	0	1.735	0	0	0	3.59169	0.86676	0	0	0	low
452	444	PC-5p-51629_22	AATTCAAGTATTCTGAGT	18	13	-	90845263	90845334	taAATTCAAGAATTCTGAGTtatgtatgcagatgacttcatcttacactcatagtaaaggattcagagtact	0						5'	New	gp4	...((((..(((((((...(((((..((.(((((....)))))..))..)))))...))))))).))))...	66	31.9	-16.7	5.25002	2.65004	6.19088	0	0.819882	0	0.770496	0	2.60028	4.05713	3.10161	1.35553	low
86	78	PC-3p-439719_2	AAGTAAATAAATGGTGGT	18	13	+	91532844	91532911	ccaggttaataccgtttagtcttcttctcttgagcaggtgagaggAAGTAAATAAATGGTGGTccatt	0						3'	New	gp4	...((....(((((((((..(((((((((..........)))))))))....)))))))))..))...	62	41.2	-24.1	3.50002	0	0	0	0	0	0	0	0	0	0.620322	0	low
268	260	PC-3p-239071_3	CTCGGAGAGACACCCAGCTTG	21	13	-	98089809	98089891	ccactctcacgctgggtctcgctccgtctcgctccagtccggCTCGGAGAGACACCCAGCTTGcagagtcgcgttcttggcct	0						3'	New	gp4	..(((((((.(((((((.((.(((((..(((........)))..))))).)).))))))).)).)))))..............	67	65.1	-34.1	0	1.32502	0	0	0	0	3.08198	2.15502	0	0	0	1.35553	low
43	35	PC-5p-43021_29	TCCTCCATGTAATTACTGCC	20	13	+	108096400	108096525	tgtgttgttctcatctttattttccagtcttttcttTCCTCCATGTAATTACTGCCtgtccttggtttctggttgTCAGTAGTTGCATGCAGGGAGGgaagatttgagaatcatgctaatagctta	0						5'	New	gp4	...((((((..(((....((((((.((((((..(.(((((.(((((((((((((.....((.........))....))))))))))))).))))))..)))))).)))))).)))..))))))...	120	39.7	-42.1	7.00003	0	4.12725	5.20499	4.91929	10.2109	5.39347	2.15502	4.3338	6.0857	5.5829	7.45544	middle
43	36	PC-3p-32849_42	TCAGTAGTTGCATGCAGGGAGT	22	13	+	108096400	108096525	tgtgttgttctcatctttattttccagtcttttcttTCCTCCATGTAATTACTGCCtgtccttggtttctggttgTCAGTAGTTGCATGCAGGGAGGgaagatttgagaatcatgctaatagctta	0						3'	New	gp4	...((((((..(((....((((((.((((((..(.(((((.(((((((((((((.....((.........))....))))))))))))).))))))..)))))).)))))).)))..))))))...	120	39.7	-42.1	14.0001	3.97506	13.4136	6.93999	5.73917	17.8691	10.0164	7.18339	6.06732	6.0857	8.06419	10.1665	middle
60	54	PC-5p-59447_18	AAGCCAGAGTCAGGGGACACTGT	23	13	-	135276797	135276875	tttatgagaAAGCCAGAGTCAGGGGACACTGTtattcatatgactgaTCAGGGTCCCTTGATTATGGCTttcttatnnn	0						5'	New	gp4	...((((((((((((.(((((((((((.((((((.((....)).))).))).))))))))))).))))))))))))...	73	39.2	-40.4	2.62501	1.98753	1.03181	1.735	3.27953	0.638181	0.770496	3.59169	0.86676	1.01428	0.930483	0.338884	low
77	69	PC-3p-81165_11	TAAAACACCACAGGGGGTAGT	21	13	-	141240596	141240692	ttcttctcacaccatagttATTACCCTCGGTGGTATTTTacaagtgaactaagtttgTAAAACACCACAGGGGGTAGTaattaaggtgtgaggatca	0						3'	New	gp4	...((((((((((.((((((((((((((.(((((.(((((((((.........))))))))).))))).)))))))))))))).))))))))))...	91	39.2	-51.1	0	0	0	5.20499	2.45964	2.55272	1.54099	0	3.46704	1.01428	2.48129	4.0666	low
165	157	PC-3p-372261_2	AGGTCGCTAACTCTGTGAC	19	13	-	143068546	143068686	ccggaactttcgcgggcctaggctcccgggagccgagcaagagcgggacagcaggcgtgcgcggagggagtcttccgttcAGGTCGCTAACTCTGTGACagcgcgctctaggagcggagcaaggcttgtgtaggttctcac	0						3'	New	gp4	..(((((((.(((..((((..(((((..(((((...((....(((((..(((.(((.((..((((((....))))))..)).))))))...)))))....))..)))))......))))).))))..))).)))))))...	136	64.5	-62.1	3.50002	0	0	0	0	0	0	0	0	0	0	0	low
242	234	PC-5p-108762_7	TTTTCCTCTACTCTGGCTGGTGA	23	13	+	148506980	148507059	atccttctTTTTCCTCTACTCTGGCTGGTGAgtggtgggaaagctccttgctcactccaggggagaggaagaggaagatt	0						5'	New	gp4	...((((((((((((((.((((((..((((((..(.(((.....))))..)))))))))))).))))))))))))))...	74	51.2	-46.4	0	1.32502	2.06363	1.735	1.63976	0	4.62298	2.87336	2.60028	1.01428	3.72193	2.0333	low
126	118	PC-5p-80191_11	TTAGGAATGTCCATGAATTCC	21	13	-	155445918	155445994	attagtggtTTAGGAATGTCCATGAATTCCaaaattaatgaattctggaattcatggatatttctataacccctcct	0						5'	New	gp4	...((.(((((((((((((((((((((((((.((((....)))).))))))))))))))))))))).)))).))...	71	32.5	-36	0	1.32502	2.06363	0	0	1.27636	3.08198	0	5.20056	1.01428	2.48129	1.35553	low
300	292	PC-5p-172002_4	GACGATCGTGATGAATGATT	20	13	+	162291676	162291800	ggctgttttttagtatctcttagacgtgGACGATCTTGATGAATGATTcatcagtatcatctgaatctatagtcaggtgtacacattcatttaatctgtcagtttgaaatattcagagaacgaag	0						5'	New	gp4	...(((((((((((((...((((((...((((((...((((((((........(((.(((((((........)))))))))).))))))))..))).))).)))))).))))).))))))))...	119	35.2	-27.8	0	0	4.12725	0	0	0	0	0	0	0	0.620322	0	low
43	59	ssc-miR-155-5p_R+1	TTAATGCTAATTGTGATAGGGGT	23	13	-	199063370	199063478	gcttgctggaggctatatgctgTTAATGCTAATTGTGATAGGGGTttttacctccgtctgactcctacatgttagcattaacagggtatgatgcctgttactagcattc	2	ssc-mir-155,mmu-mir-155,	ssc-mir-155	ctatatgctgTTAATGCTAATTGTGATAGGGGtttttacctccgtctgacTCCTACATGTTAGCATTAACAgggtatgatg	ssc-miR-155-5p	TTAATGCTAATTGTGATAGGGG	5'	Diff	gp2	...((((((((((((((..((((((((((((((...(.((((((((...((....))..)))))))))..))))))))))))))..))))..))))....))))))...	103	43.1	-41.6	6090.9	8412.56	3754.25	4304.53	5344.4	9959.46	4015.06	5623.16	3994.46	4778.79	5128.51	5723.74	high
122	149	eca-miR-9027_L+2R-2	AGGAGCTGGCCAATGAGTTGT	21	13	+	202679326	202679411	cttggcccggtaccgtgttctcattggcctcatgtcctgtcacttccAGGAGCTGGCCAATGAGTTGTcggtgctggagcccttct	1	eca-mir-9027,	eca-mir-9027	ttccttaagcacgttacgcggcctcggcccggtaccgcgttctcattggcttcctgtcctgtcagttccagGAGCTGGCCAATGAGTTGTCGgtgctggcgcccttctcgacgccgtggacgccgcg	eca-miR-9027	GAGCTGGCCAATGAGTTGTCG	3'	Diff	gp2	...((((((((((((....((((((((((.....(((((.......)))))...))))))))))....))))))))).))).....	78	58.1	-46.7	0	2.65004	1.03181	1.735	3.27953	1.27636	0.770496	0.718339	1.73352	0	1.24064	0	low
113	105	PC-3p-109891_7	TGTGGCTGTGTTCCTTTCAGT	21	13	-	213582028	213582090	cgggaaagggaaacacgccatcctgcttctgaggtctaaccaTGTGGCTGTGTTCCTTTCAGA	0						3'	New	gp4	...((((((((.(((.((((((((.......))).........)))))))).))))))))...	57	52.4	-20.1	0	0	2.06363	0	0.819882	0	0	0	3.46704	0	0	0	low
486	478	PC-3p-1428500_1	TGTCTGTGGAAGCTGAGCTGCCT	23	13	-	216987767	216987866	gcaggagggaggtcggtttcctgggtttgagggggaacaggggacgctgaatggagcagtcgggacctggcgTGTCTGTGGAAGCTGAGCTGCCTccatc	0						3'	New	gp4	...(((((.((.(((((((((..((..((..(((........((((((......))).)))....)))..))...))..))))))))).)).)))))...	94	63	-38.6	3.50002	0	0	0	0	0	0	0	0	0	0	0	low
421	413	PC-3p-37622_35	TGCGGTCACGACTCTGCTCGGAT	23	13	+	217449769	217449853	cctggaaggtgatctgtgcggggacacggggcgcaggtgagcaccaggcacTGCGGTCACGACTCTGCTCGGATctccttcctgg	0						3'	New	gp4	((.((((((.((((((.((((((...(((..(((((((.........)).)))))..).)).)))))).)))))).)))))).))	85	65.9	-41.1	1.75001	0	18.5726	3.46999	2.45964	1.27636	9.24595	8.62007	6.06732	7.09998	9.92515	2.71107	middle
320	312	PC-5p-417487_2	TGGCATCATCAGCATGGCTTTGA	23	13	-	217451624	217451750	caccaggccctcctccagctggcggtcctgcTGGCATCATCAGCATGGCTTTGCtggaggtgcctgataagggctgtgctcatgatctgccagcagggcctctggccccgttgaggaagctctgtat	0						5'	New	gp4	...(((((..(((((..((..(.(((((((((((((((((.((((..((..(...((.....)).....)..))..)))).))))..))))))))))))).)..))......))))).)).)))...	121	61.4	-63.4	3.50002	1.32502	1.03181	0	0	0	0.770496	0	0.86676	0	0.620322	0	low
350	342	PC-5p-48543_24	CGGGAGCCCCGGGGAGAG	18	13	-	217989219	217989277	tccCGGGAGCCCCGTGGAGAGggaggccctccctccctgccgtcttggggtccctgagc	0						5'	New	gp4	...((((..((((((((..(((((((.....))))))).)))...)))))..))))...	53	74.6	-32.1	0	0	5.15907	3.46999	1.63976	2.55272	3.08198	2.15502	2.60028	1.01428	1.24064	0.677767	low
29	38	ssc-miR-124a_R-1	TAAGGCACGCGGTGAATGCC	20	14	-	14442964	14443052	aaaggcctctctctccgtgttcacagcggaccttgatttaaatgtccatacaatTAAGGCACGCGGTGAATGCCaagaatggggctggc	19	ssc-mir-124a-1,ssc-mir-124a-2,bta-mir-124a-2,bta-mir-124b,eca-mir-124-1,eca-mir-124-2,cfa-mir-124-2,cfa-mir-124-3,cfa-mir-124-1,hsa-mir-124-2,ppy-mir-124a,mml-mir-124a-1,age-mir-124a,lla-mir-124a,cgr-mir-124,mmu-mir-124-3,mmu-mir-124-2,mdo-mir-124a-2,oan-mir-124a-1,	ssc-mir-124a-2	aggcctctctctccgtgttcacagcggaccttgatttaaatgtccatacaatTAAGGCACGCGGTGAATGCCAagaatggggctg	ssc-miR-124a	TAAGGCACGCGGTGAATGCCA	3'	Diff	gp2	...((((((..(((..(..(((((.(((..((((((((.............))))))))..))).)))))..)..)))..))))))...	83	50.6	-35.5	0	3.97506	4.12725	0	1.63976	3.82909	3.08198	0	0.86676	0	0	0.677767	low
65	57	PC-5p-188475_3	CCCTACTGATGACCTTGC	18	14	+	19190920	19191003	aagctgCCCTACTGATGACCTTGAgctttgtttttctgtgacatcatggagccaagagaagacagggtcagtcagttccaggtg	0						5'	New	gp4	.....(((..(((((((((((((..((((....(((..((....))..)))...))))....)))))))).)))))....))).	78	48.8	-27.8	0	0	0	3.46999	0	0	1.54099	0	0	0	0	0	low
360	352	PC-5p-115302_6	AATTTTTTACTCTGTGAGGCCT	22	14	-	22292102	22292158	AATTTTTTACTCTGTGAGGCCTaaacaaaaatGTTTAGGCCTCACAGAGCaaaatga	0						5'	New	gp4	....((((.((((((((((((((((((....)))))))))))))))))).))))...	50	35.1	-33.6	1.75001	1.32502	0.515907	0	0.819882	0	1.15574	2.87336	3.46704	1.01428	0.930483	2.0333	low
107	133	mmu-miR-3968_R-1_1ss14AT	CGAATCCCACTCCTGACACC	20	14	-	29715129	29715196	ttcgtttcagggtgatcgtctttgttctgcctcctgcagaagtacaCGGATCCCACTCCTGACACCca	2	bta-mir-2478,mmu-mir-3968,	mmu-mir-3968	acgccgagcgtgtggtggtaggatccgtgtagcaccgtctgtgtgttgttgtgccacacagagaacttgagCGAATCCCACTCCAGACACCAtgagtagg	mmu-miR-3968	CGAATCCCACTCCAGACACCA	3'	Diff	gp2	...((.((((((((...(((..((((((((.....)))))...)))..)))..))).))))).))...	62	52.9	-21.4	0	0	1.03181	13.88	0	0	3.85248	0	0	0	0	0	middle
186	178	PC-5p-469085_2	ACTATTTATGGAGGAGTGA	19	14	-	31029645	31029752	acagttttggaaaaagtgACTATTTATGGAGGAGTGGtgttaatcaagatagaacaggttacttgagttaacagttaacttccacaatagtcatctaaataaaaccct	0						5'	New	gp4	...((((((......(((((((((..((((((.....(((((((((((.(((......)))))))).)))))).....)))))).))))))))).....))))))...	102	33.3	-27.7	3.50002	0	0	0	0	0	0	0	0	0	0	0	low
139	131	PC-3p-48873_24	TTATGAGTAAAGTTGTAGTCAGG	23	14	+	33227258	33227327	gagctTTGCTGCAACTTACTCCTAAGAaggactttacaaattttTTATGAGTAAAGTTGTAGTCAGGaaa	0						3'	New	gp4	...(((..(((((((((((((.(((((((...........))))))).)))).)))))))))..)))...	64	34.3	-20.8	5.25002	9.27515	7.22269	1.735	2.45964	2.55272	5.39347	4.31003	0.86676	4.05713	9.92515	4.74437	low
401	393	PC-5p-52471_21	GGAAGGCCGGTGGGGAAGG	19	14	+	35294410	35294506	ctaggaggaGGAAGGCCAGTGGGGAAGGgtctgccttgtctcaggtgcctccctcatcacaaggtcttcttcccctctggtcccttcttccttcagc	0						5'	New	gp4	...((((((((((((((((.((((((((....(((((((...(((......)))....)))))))..)))))))).))))..))))))))))))...	91	58.8	-51.1	0	2.65004	4.12725	1.735	1.63976	3.82909	0.770496	0.718339	0	0	3.10161	1.35553	low
266	258	PC-3p-48033_24	CCCTGTCTCACTGTCTCCTTCC	22	14	-	36090803	36090893	aatggctgtggaagggggAGGGAGACGGCAGACAAGAGCGtgaagcccccccagCCCTGTCTCACTGTCTCCTTCCcccacacaagccctt	0						3'	New	gp4	...(((((((...(((((((((((((((.(((((.(.((.((.........)))).))))))..))))))))))))))).)))).)))...	85	62.6	-46.4	0	0	1.03181	1.735	0	1.27636	18.4919	0.718339	1.73352	6.0857	3.10161	1.35553	middle
122	114	PC-5p-114467_6	ACGATCTGTAAACATCCC	18	14	-	43991693	43991749	gctgcACAATCTGTAAACATCCCctattagaggtggtgtggcagggcctggtgctga	0						5'	New	gp4	...((((..(((((..(((((.(((.....))).))))).))))).....))))...	51	54.4	-18.8	0	0	1.03181	0	4.09941	2.55272	0	0	0.86676	2.02857	0	0.677767	low
285	277	PC-5p-583452_1	GCCACACGAGTTCTCTGCGCC	21	14	+	48143993	48144073	gcctcgaacagctgtgGCCACACGAGTTCTCTGCGCCccagtccctgctgtccaagagtccagagccccgccgtggccgtg	0						5'	New	gp4	...............((((((.((.(((((..((....((((....)))).......))..)))))..))..))))))...	63	67.9	-20.7	0	3.97506	0	0	0	0	0	0	0	0	0	0	low
439	431	PC-5p-198240_3	GAGGGGGCGGGCAGACACT	19	14	+	50304837	50304908	gggtgggcgGAGGGGGCGGGCAGACACCccccaccccggctgggcgtctccctgccccctccagactcaatt	0						5'	New	gp4	((((....((((((((((((.((((.(((.((.....))..))).)))).))))))))))))..))))....	68	75	-44.6	0	0	0	0	0	0	0	0	0	3.04285	0	0	low
172	164	PC-5p-1260806_1	ACTGTGGGGAGGGACAGGATGGA	23	14	-	50883792	50883879	ACTGTGGGGAGGGACAGGATGGAtgcacattttggggaaggctgttctggggcctccttcaaagcatctgcctgtgcttcctccaaag	0						5'	New	gp4	.((.((((((((.(((((...(((((....((((..(.(((((.......))))).)..)))))))))..))))).))))).))).))	87	55.7	-40.8	3.50002	0	0	1.735	0.819882	1.27636	0.770496	0	0	0	0	0	low
456	448	PC-5p-107002_7	CCCGTGGTTACACTGACT	18	14	-	78520797	78520893	gcccacgtggtcatgtgcagcctTCCGTGGTTACACTGACTgcagctggcacacagatgcagtgcggtggtttgcagaaagctgtggctctgtgaga	0						5'	New	gp4	...((((..(((....(((((.(((.(..(...(((((((((((.(((.....))).)))))).)))))..)..).))).))))))))..))))...	91	57.7	-39.9	1.75001	3.97506	0	3.46999	1.63976	0	0.770496	0	2.60028	0	0.620322	0	low
469	461	PC-5p-977629_1	TTGCTCTGCCACCGGTAACAGCT	23	14	-	82571930	82572077	tctcaccagctcagagcttcccttcacttgctctgtatggaaactgctcttttatgaatTTGCTCTGCCACCGGTAACAGCTaataaatttcaaggaaatgactcattctttctgtgatatctgagggcagacgaaaactggggctaa	0						5'	New	gp4	.....(((...((((((............))))))..))).....(((((........((((.((((((..(((..((((............((((((........)))))))))).....)))..))))))))))....)))))...	100	43.2	-37.2	0	0	0	8.67499	0	1.27636	0	0	0	0	0	0	low
294	286	PC-3p-115770_6	AGGAATTGAAGGACCAGTT	19	14	+	100785845	100785946	agctggtggtgcctggacctacaacaccacttctgctgtcatggtaaagtctgccatcagacaactgaAGGAATTGAAGGACCAGTAgaagcactaccaatg	0						3'	New	gp4	...(((((((((((((.(((.(((.....((((...((((((((((.....))))))..))))...))))...))).))).)))).....)))))))))...	96	49	-37.7	3.50002	3.97506	3.09544	8.67499	8.19882	3.82909	0	1.43668	0	5.07142	2.48129	0.677767	low
487	479	PC-5p-110157_7	TTTAAACTAGTCGCAAACG	19	14	+	100898721	100898821	ttTCTAAACTAGTCGCAAACGgaaaagtggttaatacatagtcattttccctttctttcaggaaaattactaaggactaatgttttctgtgacatgtttgg	0						5'	New	gp4	...((((((..((((((...(((((..(((((......((((.(((((((..........))))))).))))..)))))...)))))))))))..))))))	98	33.7	-25.7	0	0	0	24.29	0	0	0	0	0	0	0	0	middle
32	28	PC-5p-34973_39	ATGTGCTTGGCTGAGGAGC	19	14	-	105385936	105386000	nnngcaATGTGCTTGGCTGAGGTGCtaaacttcattctagttctgttagtcaacactaaggcact	0						5'	New	gp4	...((...(((.((((((((((..(((..........)))..)).)))))))))))....))...	59	41.5	-15.5	2.62501	3.97506	1.03181	6.93999	3.68947	5.10545	2.31149	0.359169	0.86676	1.01428	2.48129	2.0333	low
28	37	ssc-miR-107_R-1	AGCAGCATTGTACAGGGCTATC	22	14	-	110407055	110407146	atattctctctgctttcAGCTTCTTTACAGTGTTGCCTTGtggcatggagttcaAGCAGCATTGTACAGGGCTATCaaagcacagagagctt	27	ssc-mir-107,ssc-mir-103-2,ssc-mir-103-1,bta-mir-107,bta-mir-103-2,bta-mir-103-1,oar-mir-103,eca-mir-103,eca-mir-107a,cfa-mir-103-2,cfa-mir-103-1,cfa-mir-107,hsa-mir-103a-1,hsa-mir-103a-2,ptr-mir-103-2,cgr-mir-107,cgr-mir-103,mmu-mir-107,mmu-mir-103-2,mmu-mir-103-1,rno-mir-107,mdo-mir-107,mdo-mir-103-2,mdo-mir-103-1,oan-mir-107,oan-mir-103-1,oan-mir-103-2,	ssc-mir-107	ttctctctgctttcagcttctttacagtgttgccttgtggcatggagttcaAGCAGCATTGTACAGGGCTATCAaagcacagagagc	ssc-miR-107	AGCAGCATTGTACAGGGCTATCA	3'	Diff	gp2	...((((((.((((((.(((.(((.(((((((((((.(((............)))))))))))))).))))))...)))))).))))))...	86	44.6	-33.4	4840.52	5473	5547.54	5067.93	4923.39	4312.19	5232.05	5646.5	5227.86	4631.22	4269.68	4474.28	middle
303	295	PC-3p-198101_3	AGCGAATGCGCAGGCTGAAG	20	14	-	111406193	111406266	ctctcagccttagcaccatcttctgagaaacctctgagcaaagtgggggaaaaAGCGAATGTGCAGGCTGAAGt	0						3'	New	gp4	...(((((((..((((..((..((......((((..........)))).....)).))..)))))))))))...	68	50	-20.7	0	0	0	3.46999	0	0	0	0	0	0	0	0.677767	low
482	474	PC-3p-180965_3	TTTTGTATTTATGATGGTG	19	14	+	118077854	118077940	cacccaaatcaccattaatagaataatgtagttttttaggcttttggaatatgtcttctcTTTTGTATTTATGATGGTGtttggaat	0						3'	New	gp4	...(((((.((((((((...(((((....((......((((...........))))...))....))))).)))))))))))))...	81	29.9	-19.2	0	3.97506	0	0	0	0	0	0	0	1.01428	0	0	low
68	60	PC-3p-144008_5	CATACAAGCATTTTGAACTTGA	22	14	+	118986443	118986544	tatgggaacagtccctcTGTCCTCAAGTTTAAAATGTTTGtatttgtgtgtcacggcaCATACAAGCATTTTGAACTTGAggacagagggactgttcccttt	0						3'	New	gp4	...((((((((((((((((((((((((((((((((((((((....((((((....))))))))))))))))))))))))))))))))))))))))))))...	96	42.2	-76.3	1.75001	6.6251	0	1.735	1.63976	0	0	0.718339	1.73352	0	0.620322	2.0333	low
318	310	PC-3p-209121_3	TCTCTGCAAGTCTGGGCAATA	21	14	+	120322926	120323010	atttctgtttgtcagtacgattattagagggatagagggacacatcctcagaccatttTCTCTGCAAGTCTGGGCAATAagatcc	0						3'	New	gp4	...(((..(((((.....((((..(((((..(..(((((.....))))).......)..)))))..))))..)))))..)))...	79	42.4	-20	0	3.97506	0	0	0	0	0	0	0	0	0	0	low
192	184	PC-3p-40185_32	GGCCGGCGGCGGCGGCGACT	20	14	+	122142127	122142235	ggggttttggcagcgtctctgaggctggggcctgggcctcctgcctgctggaggagggggcagcgggacctgggcagaGGCCGGCGGCGGGGGCGACTgaagggacggg	0						3'	New	gp4	...((..(..(((((((((((..(((((.(((..((((..(((((..((.....))..)))))..)).))..))).....)))))..)))))))).)))..)..))...	103	75.2	-55.9	3.50002	2.65004	7.22269	5.20499	2.45964	5.10545	1.54099	0.718339	3.46704	0	1.24064	1.35553	low
38	51	ssc-miR-146b_R+3	TGAGAACTGAATTCCATAGGCTGT	24	14	+	123301771	123301832	cTGAGAACTGAATTCCATAGGCTGTgagctctagcaaaTGCCCTAGGAACTCAGTTCTGGTg	14	ssc-mir-146b,bta-mir-146b,bta-mir-146a,eca-mir-146b,cfa-mir-146b,hsa-mir-146b,ptr-mir-146b,ppy-mir-146b,ggo-mir-146b,cgr-mir-146b,mmu-mir-146b,rno-mir-146b,mdo-mir-146b,oan-mir-146b,	ssc-mir-146b	gaactttggccacctggctcTGAGAACTGAATTCCATAGGCtgtgagctctagcaaatgccctaggaactcagttctggtgcccggctgtgctatagtc	ssc-miR-146b	TGAGAACTGAATTCCATAGGC	5'	Diff	gp2	...((((((((.((((.((((..((..((....))..))..)))))))).))))))))....	55	48.4	-23.4	168.876	307.405	253.826	221.212	260.312	502.249	607.151	1395.37	1383.78	1517.37	2199.97	1239.64	middle
38	52	eca-miR-146b-3p_R+1_1ss10GA	TGCCCTAGGAACTCAGTTCTGGT	23	14	+	123301771	123301832	cTGAGAACTGAATTCCATAGGCTGTgagctctagcaaaTGCCCTAGGAACTCAGTTCTGGTg	14	ssc-mir-146b,bta-mir-146b,bta-mir-146a,eca-mir-146b,cfa-mir-146b,hsa-mir-146b,ptr-mir-146b,ppy-mir-146b,ggo-mir-146b,cgr-mir-146b,mmu-mir-146b,rno-mir-146b,mdo-mir-146b,oan-mir-146b,	eca-mir-146b	cctggctcTGAGAACTGAATTCCATAGGCTgtgagctccagcaaaTGCCCTAGGGACTCAGTTCTGGtgcccgg	eca-miR-146b-3p	TGCCCTAGGGACTCAGTTCTGG	3'	Diff	gp2	...((((((((.((((.((((..((..((....))..))..)))))))).))))))))....	55	48.4	-23.4	3.50002	0	1.03181	1.735	0.819882	2.55272	3.85248	3.59169	5.20056	2.02857	11.1658	6.0999	middle
115	141	hsa-miR-4680-3p_R-1	TCTGAATTGTAAGAGTTGTT	20	14	+	132260970	132261052	ctactgaatataaaaactcttgcaagtcttagatgttataaaaaatacatataTCTGAATTGTAAGAGTTGTTagcacagnnn	2	bta-mir-4680,hsa-mir-4680,	hsa-mir-4680	tataAGAACTCTTGCAGTCTTAGATGTtataaaaatatataTCTGAATTGTAAGAGTTGTTAgcac	hsa-miR-4680-3p	TCTGAATTGTAAGAGTTGTTA	3'	Diff	gp2	...(((....(((.(((((((((((...((((((((..............)))))))).))))))))))).)))...)))...	77	26.5	-20.1	0	2.65004	0	0	1.63976	0	0	0	1.73352	4.05713	2.48129	0	low
103	129	mmu-miR-3084-3p_L+2R-1_1ss4TG	AATGCTGCCAGTCTCCTTCAGA	22	14	-	140518175	140518231	aattgaaggttaattagcagtataactaaatagtAATGCTGCCAGTCTCCTTCAGAc	1	mmu-mir-3084-1,	mmu-mir-3084-1	caaataGTTGAAGGTTAATTAGCAGAGTaactgaatatagtaaTTCTGCCAGTCTCCTTCAGACaaaaa	mmu-miR-3084-3p	TTCTGCCAGTCTCCTTCAGAC	3'	Diff	gp2	..(((((((...(((.(((((((.(((....))).))))))).)))..)))))))..	53	35.1	-20	0	0	4.12725	0	0	0	3.08198	0	0	1.01428	1.86097	3.38884	low
79	102	ssc-miR-339_R-1_1ss5TG	TCCCGGTCCTCCAGGAGCTC	20	14	+	143671045	143671166	gcccccggcactgctgctgcccTCCAGGTCCTCCAGGAGCTCgctgtgggggagaaggaagggtgagggatcccccccaagggagggctccaggaggctggggctctggtggctgctgggat	14	ssc-mir-339-1,ssc-mir-339-2,ssc-mir-4334,bta-mir-339b,bta-mir-339a,cfa-mir-339-1,hsa-mir-339,ptr-mir-339,ppy-mir-339,ggo-mir-339,mml-mir-339,cgr-mir-339,mmu-mir-339,rno-mir-339,	ssc-mir-339-2	taagacaaggTCCCTGTCCTCCAGGAGCTCAtggtccaatagaagcatatatacaaatggctctgaggggagatcccgctgtggct	ssc-miR-339	TCCCTGTCCTCCAGGAGCTCA	5'	Diff	gp2	...(((((((..((..(((((((...((.(((((.(((((((.((.((((((........(((.......)))))))))..)).))))))).))))))))))))...))..)))))))))..	117	70.5	-66.3	0	1.32502	4.12725	1.735	3.27953	19.1454	13.0984	3.59169	3.46704	0	2.48129	2.0333	middle
178	170	PC-3p-105283_7	CTTTGGGGTTTTAAGCAGG	19	14	-	144729012	144729119	ggaggtaaatagcagcccgtggccaaatgagacccagagacagggtcctgccctgcCTTTGGGGTTTTAAGCAGCcgtgagaatccccccgggacatactttgccaga	0						3'	New	gp4	...((((((......((((((((....((((((((((((.(((((.....))))).)))).))))))))....))))............))))......))))))...	102	57.4	-38.8	1.75001	1.32502	3.09544	10.41	2.45964	2.55272	2.31149	1.43668	0	1.01428	1.24064	3.38884	middle
194	186	PC-5p-272423_2	CAGGAGGTTGGCTTGGAAG	19	14	+	145594073	145594167	gcgctggcCAGGAGGTTGGCCTGGAAGagttaccacgtgcacgagagcaggaagctacacatggaatgggtaccaccagcctccttggccagaag	0						5'	New	gp4	...((((((((((((((((..(((....(((.(((.(((......(((.....))).))).)))))).....))))))))))))).))))))...	89	60	-40.6	0	0	0	3.46999	0	0	0	0	0	0	0	0	low
258	250	PC-5p-20784_80	TAAGGCGAGCTCAGGGAGG	19	14	+	146006543	146006635	tTAAGGCGAGCACAGGGAGGgcagtctttgcgcctcttgactggcagagaagcgcagctcaggctttcccactttccttctgcacctgcccct	0						5'	New	gp4	....((((.(((.((((((((.(((((((((((.((((........)))).))))))...)))))..)))....))))).)))...))))...	86	59.1	-33.2	26.2501	23.8504	18.5726	27.76	12.2982	21.6982	10.7869	0.718339	2.60028	3.04285	3.72193	6.77767	middle
174	166	PC-3p-57755_19	TAACCTCTGCTTCCCCCGAAGT	22	14	+	149154796	149154864	cacgcctccctcgggggacgcgggatcgaaggccgtgggctcTAACCTCTGCTTCCCCCGAAGGgctac	0						3'	New	gp4	...((((...((((((((.(((((......((((...))))......))))).)))))))).))))...	63	69.6	-32.8	3.50002	2.65004	1.03181	8.67499	10.6585	2.55272	3.85248	2.15502	3.46704	8.11426	4.34225	9.48874	middle
400	392	PC-3p-48505_24	ACAGCAGGACGGTGGCCAT	19	14	+	149938262	149938375	acagggacagacgtcaagcgctcccgcctgctctcggggaaacaacttccaattccttggcaggttgctaataaccattcACAGCAGGACGGAGGCCATatctggaacctggac	0						3'	New	gp4	.((((..((((..(...((.((((..((((((....((....((((((((((....)))).)))))).......))......))))))..)))))).)..))))...))))...	110	55.3	-39.8	3.50002	0	0	17.35	0.819882	0	3.08198	0.718339	0	1.01428	2.48129	1.35553	middle
410	402	PC-3p-32012_44	GGTGTCCTAAGGGGGACTC	19	14	-	151217954	151218044	caggcccagacttgtcccatccaggcctcgggacccaaggggacacactagtgctagggagaGGTGGCCTAAGGGGGACTCactgggtgct	0						3'	New	gp4	...((((((....(((((....(((((((....(((...((.((......)).)).)))...)).)))))....)))))...))))))...	85	63.7	-35.8	0	0	0	189.115	0.819882	1.27636	2.31149	0	0	3.04285	0.620322	0	middle
63	82	ssc-miR-202-5p	TTCCTATGCATATACTTCTTT	21	14	-	153169571	153169732	cctggcccgaccgtcctggcacctgcgcctcgtgggccccgcagccgctcgccgttccgccTTCCTATGCATATACTTCTTTgagggtctggcctgaAGAGGTGTAGGCATGGGAAACCggggcgacgaggtcttcccacgccgcagagcccgccacggcct	10	ssc-mir-202,bta-mir-202,cfa-mir-202,hsa-mir-202,ptr-mir-202,ppy-mir-202,ggo-mir-202,mmu-mir-202,rno-mir-202,sha-mir-202,	ssc-mir-202	cgccgttccgccTTCCTATGCATATACTTCTTTgagggtctggcctgaAGAGGTGTAGGCATGGGAAaccggggcgacga	ssc-miR-202-5p	TTCCTATGCATATACTTCTTT	5'	Yes	gp2	...((((....((....(((..(((((...((((((.......(((..(((.((..(((..(((((((((.(((((((((((.(((......)))))))))))))).)))))))))..)))..)).))))))...)))))).))))).)))))....)))).	158	67.9	-74.5	12.2501	3.97506	13.4136	13.88	18.0374	11.4873	2.31149	19.3951	11.2679	4.05713	3.72193	7.45544	middle
63	83	ssc-miR-202-3p_R+3	AGAGGTGTAGGCATGGGAAACC	22	14	-	153169571	153169732	cctggcccgaccgtcctggcacctgcgcctcgtgggccccgcagccgctcgccgttccgccTTCCTATGCATATACTTCTTTgagggtctggcctgaAGAGGTGTAGGCATGGGAAACCggggcgacgaggtcttcccacgccgcagagcccgccacggcct	10	ssc-mir-202,bta-mir-202,cfa-mir-202,hsa-mir-202,ptr-mir-202,ppy-mir-202,ggo-mir-202,mmu-mir-202,rno-mir-202,sha-mir-202,	ssc-mir-202	cgccgttccgccTTCCTATGCATATACTTCTTTgagggtctggcctgaAGAGGTGTAGGCATGGGAAaccggggcgacga	ssc-miR-202-3p	AGAGGTGTAGGCATGGGAA	3'	Diff	gp2	...((((....((....(((..(((((...((((((.......(((..(((.((..(((..(((((((((.(((((((((((.(((......)))))))))))))).)))))))))..)))..)).))))))...)))))).))))).)))))....)))).	158	67.9	-74.5	3.50002	0	0	0	0	2.55272	0	2.87336	0	0	0	0	low
228	220	PC-3p-187464_3	GTCTCTCTCCCCATTCACT	19	15	-	9107620	9107708	ttgacagtttgaaggattaagggataacaatgacagtagttgttattattaccaagtcttactgtGTCTCTCTCACCATTCACTgtgtc	0						3'	New	gp4	...(((((..(((((....(((((((.....(((.(((((.......)))))...)))......)))))))....)).))))))))...	83	37.1	-18.7	0	0	0	0	0	0	0	0	0	3.04285	0	0	low
432	424	PC-5p-345982_2	GATATTTCCTTTGCTGTT	18	15	-	9308497	9308603	aaagctggaattttaccccctGATATTTCCTTTGCTGTTtaatggtacatatcttgtaagataagcaaggcaaggcaataagtaagtaagtaaataataaaggcact	0						5'	New	gp4	...(((.....(((((...((..((((.((.((((((((((....((((.....))))...))))))..)))))).))))....))...))))).......)))...	101	33.6	-18.4	0	0	0	3.46999	0	0	0	0	0	0	0	0	low
298	290	PC-5p-11402_181	TCGAAACCATCCTCTGCTACC	21	15	+	13628732	13628829	taacagagagggacctaacatTCTAAACCATCCTCTGCTACCagacctgtccgtaatagggtgatgttttagaaatcttaatcatcaatcttctgatt	0						5'	New	gp4	...((((((..((..(((..(((((((.((((((((..(((..((....)).)))..)))).)))).)))))))...)))....))..))).)))...	92	38.8	-21.8	12.2501	13.2502	10.3181	45.1099	6.55905	6.38181	33.9018	13.6484	12.1346	25.3571	16.7487	16.9442	middle
337	329	PC-3p-169354_4	TGTGTATGAATAATGACT	18	15	+	19326306	19326462	ctgcattagagtgaacatactgaccttttcattatcaaatgtttctgtagatgttattccacaatctatgcaagatttgcTGTGTATGAATAATGACTttcctccaagagcacattgcctggtaagatggtaagtatatattttactttagtgtgta	0						3'	New	gp4	..(((((((((((((.(((((.(((...((.(((((((((((((((..((..(((((((((((((((.....))))....))))...)))))))..))........)))).)))))...)))))))).))).)))))....)))))))))))))...	152	33.8	-35.1	0	0	0	0	2.45964	0	3.08198	0	0	0	0	0	low
315	307	PC-5p-12052_168	CTGTTAGTGATGATTTATA	19	15	-	26932275	26932351	tccttccagccctcttataCTGTTAGTGGTGATTTATAgaaaccctatgtaaactatttaaacagggcttgggatca	0						5'	New	gp4	...(((((((((........((((((((((....(((((.....)))))...))))))..))))))))).))))...	71	39	-19.4	13.1251	14.5752	7.22269	3.46999	5.32923	15.3163	7.31971	1.79585	1.73352	5.07142	8.99467	6.0999	middle
480	472	PC-3p-1305355_1	GCTGAGTTGTGATGTGGTGG	20	15	-	32437589	32437706	aatcacctagatattctacaatcttttcacttactaactgctacattcagtctcttcaaaaaaggacttGCTGAGGTGTGATGTGGTGGtaatagtggagatttaataaaaggtgttt	0						3'	New	gp4	...(((((...((((....((((((..((((.....((..(((((((((.((((..(((........)))..)))))).)))))))..))...)))))))))).))))..)))))...	112	34.7	-29.6	0	0	0	3.46999	0	0	0	0	0	0	0	0	low
234	226	PC-3p-10470_204	CTGCTCTCCTGTCTCCGCTCAGT	23	15	+	35897047	35897109	ctggggcgggcgggcgggcagcggaggttactgagtttcaCTGCTCTCCTGTCTCCGCTCAGG	0						3'	New	gp4	((.(((((((((((.((((((.((((.........)))).)))))).)))))..)))))))).	62	68.3	-29.3	3.50002	1.32502	21.6681	15.615	3.27953	0	55.4757	29.4519	17.3352	45.6427	41.5616	16.2664	middle
247	239	PC-5p-421589_2	GCAGAGAAGGGAGACAGAAG	20	15	-	36465180	36465281	atggcttgggaagaggtgtGCAGAGAAGGGACACAGAAGataaactgaaggtaagtcacttctttctccctacttctgattagggccaaagacctaagcgtt	0						5'	New	gp4	...(((((((....(((...(((((.(((((...(((((....(((.......)))..)))))...))))).).))))......))).....)))))))...	96	46.1	-29	0	0	0	3.46999	0	0	0	0	0	0	0	0	low
89	114	bta-miR-574_R-4	TGAGTGTGTGTGTGTGAGTG	20	15	-	49773170	49773261	aaagttgatcactgacccatcccactgggactccctctcccagggaaggattcatgtctgggggTGAGTGTGGGTGTGTGAGTGgcagcaga	6	ssc-mir-574,bta-mir-574,cfa-mir-574,hsa-mir-574,ggo-mir-574,mmu-mir-574,	bta-mir-574	ttcttttgagcttacttcccagtctcgaatccgtgTGAGTGTGTGTGTGTGAGTGTGTGtgagagtg	bta-miR-574	TGAGTGTGTGTGTGTGAGTGTGTG	3'	Diff	gp2	...((((.(((((.((.((((((((((((...))).((((((((............))))))))..)))).))))).)).)))))))))...	86	56.5	-37.3	5.25002	1.32502	3.09544	10.41	2.45964	3.82909	3.08198	2.87336	0.86676	1.01428	1.86097	1.35553	middle
197	189	PC-3p-354996_2	TCGCGCGCGTGCCGGCCGGGC	21	15	+	52592960	52593019	cccgcccacccgccgcgcgccggccttcccgtcaggTCGCGCGCGTGCCGGCCGGGCagc	0						3'	New	gp4	...((((..(((.(((((((((((((.......)))))).))))))).)))..))))...	54	86.7	-36.5	5.25002	1.32502	0	0	0	0	0	1.43668	1.73352	0	1.24064	0.677767	low
200	192	PC-5p-23267_69	TCAGGGAGGACAGAAACC	18	15	+	54469429	54469503	gggtgggtatagacttgaTCAGGGAGGACAGAAACCatgtaatatggtgctgtggcctgaaaatttaacctagaa	0						5'	New	gp4	...(((((.((((.((..(((((....((((..((((((...)))))).))))..))))).)))))))))))...	69	44	-18.5	22.7501	15.9003	8.2545	27.76	13.1181	15.3163	30.8198	5.74671	4.3338	4.05713	10.5455	2.71107	middle
54	48	PC-5p-304404_2	GCGCTGAGGGGTGTGGCGGCTT	22	15	-	55779039	55779145	gtagcGCGCTGAGGGGTGTGGCGGCTTctgcggttgcactggggttcggacgagtacggagcgcctggagggacagcctggtacgCGGCCCCCGCCTCTTAGTGCGc	0						5'	New	gp4	...(((((((((((((((.((.((((..((((((((..((((.(((((........).)))).))....))..)))))..)))...)))))))))))))))))))))	104	70.1	-51.9	0	0	0	0	0	0	0	0	0	3.04285	0	0	low
54	49	PC-3p-368834_2	CGGCCCCCGCCTCTTAGTGCG	21	15	-	55779039	55779145	gtagcGCGCTGAGGGGTGTGGCGGCTTctgcggttgcactggggttcggacgagtacggagcgcctggagggacagcctggtacgCGGCCCCCGCCTCTTAGTGCGc	0						3'	New	gp4	...(((((((((((((((.((.((((..((((((((..((((.(((((........).)))).))....))..)))))..)))...)))))))))))))))))))))	104	70.1	-51.9	0	0	0	0	0.819882	0	3.08198	0	0	2.02857	0	0.677767	low
443	435	PC-5p-99306_8	CCCCCAACTTCTTAGAGG	18	15	-	69322086	69322141	tCCCCCAACTCCTTAGAGGccccatcttttgatgccgaagagagacagttgggatt	0						5'	New	gp4	...(((((((((((...(((..((.....))..)))...))).))..))))))...	50	51.8	-16.9	1.75001	1.32502	1.03181	1.735	3.27953	1.27636	0.770496	0.718339	0	0	0.620322	0.677767	low
307	299	PC-5p-11137_187	CAGCCTCTGGCATGTTGGA	19	15	+	78245583	78245657	ctgCAGCCTCTGCCATGTTGGAatttcaaacccaaaacagctgcttggaaggagccagcatgccagaggctgggc	0						5'	New	gp4	...(((((((((.((((((((..((((((...............))))))....)))))))).)))))))))...	69	56	-33.2	19.2501	21.2003	14.4454	22.555	21.3169	31.9091	14.6394	7.90173	12.1346	5.07142	14.8877	8.1332	middle
118	110	PC-3p-39324_33	TTTCTCTTCTGTTTCTCTCCCC	22	15	+	105934800	105934861	atagggatctgagaagcagagagaaacagctggagttgTTTCTCTTCTGTTTCTCTCCCCat	0						3'	New	gp4	...((((...((((((((((((((((((((....))))))))))).)))))))))))))...	56	45.2	-34.3	5.25002	3.97506	13.4136	15.615	8.19882	0	8.47546	4.31003	4.3338	14.2	8.68451	8.1332	middle
3	4	PC-5p-37199_35	TAGCTAGATGAATAATAACGTT	22	15	+	106518391	106518472	aaagttaTAGCTAGATGAATAATAACGTTttcgatccatcagcttggatcgaaAACGTTATTATTCATCTAGCTataacagc	0						5'	New	gp4	...(((((((((((((((((((((((((((((((((((......)))))))))))))))))))))))))))))))))))...	76	32.9	-56.3	1.75001	4.63757	2.57953	1.735	4.09941	8.29636	3.08198	3.95086	4.76718	4.05713	2.48129	5.42214	low
3	5	PC-3p-49217_24	AACGTTATTATTCATCTAGCT	21	15	+	106518391	106518472	aaagttaTAGCTAGATGAATAATAACGTTttcgatccatcagcttggatcgaaAACGTTATTATTCATCTAGCTataacagc	0						3'	New	gp4	...(((((((((((((((((((((((((((((((((((......)))))))))))))))))))))))))))))))))))...	76	32.9	-56.3	3.50002	1.32502	3.09544	3.46999	6.14911	5.10545	1.92624	2.87336	3.03366	2.02857	3.41177	9.82762	low
146	138	PC-3p-411883_2	GCTCCTTCGTGCACTGCGA	19	15	-	131633993	131634083	cgcggtcctcctgctgctggccgcctgtgccggaccggcccagggcctggGCTCCTTCGTGCACTGCGAgccctgcgacgagaaagccctc	0						3'	New	gp4	...(((..((..(..((.((((((..((((((((..(((((((...)))))))..)))).)))).))).)))..))..)..))..)))...	85	73.6	-40.4	0	0	0	3.46999	0	0	0	0	0	0	0	0	low
466	458	PC-3p-943709_1	TCTGGGTGCCCCCTCCATT	19	15	-	133146439	133146544	gcagaggagtgggcaccagtgagctggaacaagggtagtgggggtggcaaggctgccagtctcgtgggccctgccttctcCCTGGGTGCCCCCTCCATTatgcacg	0						3'	New	gp4	(((..((((.(((((((((.(((..((....(((((..((((..(((((....)))))..))))...))))).))..))).)).))))))).))))....)))...	103	65.1	-52.6	0	0	0	3.46999	0	0	0	0	0	0	0	0	low
82	105	bta-miR-375_L-1	TTTGTTCGTTCGGCTCGCGTGA	22	15	+	133957544	133957628	ctccgcccccgccccgcgacgagcccctcgcacaaaccggacctgagcgtTTTGTTCGTTCGGCTCGCGTGAggcaggggcggcc	6	bta-mir-375,cfa-mir-375,ptr-mir-375,ggo-mir-375,rno-mir-375,mdo-mir-375,	bta-mir-375	ccccgcgacgagcccctcgcacaaaccggacctgagcgTTTTGTTCGTTCGGCTCGCGTGAggc	bta-miR-375	TTTTGTTCGTTCGGCTCGCGTGA	3'	Diff	gp2	..(((((((.(((.((((.((((((...((.(((((.((........)).))))).))...)))))))))).))).)))))))..	81	72.9	-48.2	3.50002	2.65004	0	0	2.45964	0	6.16397	7.18339	4.3338	4.05713	1.24064	2.0333	low
100	92	PC-3p-473645_2	ATTGGCTCTGAGGGCTGGG	19	15	-	134344756	134344833	catgccccaccccctttagtcaagcatttcctggtgtcactgagtaccaggaagcATTGGCTCTGGGGGCTGGGccag	0						3'	New	gp4	...((((..(((((...((((((((..(((((((((........))))))))))).))))))..)))))..))))...	72	59	-40.1	0	0	0	3.46999	0	0	0	0.718339	0.86676	0	0	0	low
42	57	mdo-miR-153-1-5p_L+1	GTCATTTTTGTGATCTGCAGCT	22	15	-	134369108	134369197	nnnacagctgccagcGTCATTTTTGTGATCTGCAGCTagtattctcactccagTTGCATAGTCACAAAAGTGATCattggcaggtgtggc	12	ssc-mir-153,bta-mir-153-1,eca-mir-153-1,eca-mir-153-2,cfa-mir-153,hsa-mir-153-1,ptr-mir-153,mmu-mir-153,mdo-mir-153-1,mdo-mir-153-2,oan-mir-153-1,oan-mir-153-2,	mdo-mir-153-1	ctcacagctgccagtgTCATTTTTGTGATCTGCAGCTagtattctggcttcagTTGCATAGTCACAAAAGTGATCattggcaggtgtggc	mdo-miR-153-1-5p	TCATTTTTGTGATCTGCAGCT	5'	Diff	gp2	...(((.(((((((.((((((((((((((.((((((((((......)))..)))))))..))))))))))))))..))))))).)))...	84	45.6	-40.4	15.7501	30.4755	9.28632	19.085	21.3169	15.3163	9.24595	4.31003	9.53436	13.1857	9.92515	16.9442	middle
42	58	ssc-miR-153_R+2	TTGCATAGTCACAAAAGTGATC	22	15	-	134369108	134369197	nnnacagctgccagcGTCATTTTTGTGATCTGCAGCTagtattctcactccagTTGCATAGTCACAAAAGTGATCattggcaggtgtggc	12	ssc-mir-153,bta-mir-153-1,eca-mir-153-1,eca-mir-153-2,cfa-mir-153,hsa-mir-153-1,ptr-mir-153,mmu-mir-153,mdo-mir-153-1,mdo-mir-153-2,oan-mir-153-1,oan-mir-153-2,	ssc-mir-153	agcggtggccagtgtcatttttgtgatgttgcagctagtaatatgagcccagTTGCATAGTCACAAAAGTGAtcattggaaactgtg	ssc-miR-153	TTGCATAGTCACAAAAGTGA	3'	Diff	gp2	...(((.(((((((.((((((((((((((.((((((((((......)))..)))))))..))))))))))))))..))))))).)))...	84	45.6	-40.4	29.7501	47.7008	48.4952	39.9049	36.0748	51.0545	26.1969	20.8318	36.4039	15.2142	29.7755	60.999	middle
328	320	PC-3p-395543_2	GATGTCAGTAGAAACAAGGA	20	15	+	145002667	145002795	nnntgttacaggctccataagcatctcagaatcttgatgacttttttcacatgacattcttcctccctagGATGTCAGTAGAAACAAGGAacacagacgatgagctgatctatgagattgtattcaacc	0						3'	New	gp4	...((.((((..((.((((..((.((((...(((......(((.((((((.(((((((((........))))))))))).)))).)))......)))...)))).))...))))))..))))..))...	123	39.5	-30	3.50002	0	0	0	0	0	0	0	0	1.01428	0	0	low
212	204	PC-5p-79605_11	CCTGGGCAGGGCGAAGCCA	19	15	-	149006794	149006871	caaagaCCTGGGCAGGGAGAAGCCAacctgcttatgcccctggaaatgagtttctgggctcctctctgcaggtctggt	0						5'	New	gp4	...((((((..((((((((.((((.....((((((.((...))..)))))).....)))).))))))))))))))...	72	56.4	-34.5	3.50002	0	0	1.735	1.63976	1.27636	1.54099	1.43668	0	0	0.620322	0	low
238	230	PC-5p-211997_3	ATCTGCAGATGATGTGAGAGA	21	15	-	150734795	150734876	cgccacttggaATGTGCAGATGATGTGAGAGAgacgctatggaccctgttttctttctttgtcatgtactcaccgggtgacc	0						5'	New	gp4	...(((..((...(((((((..(...((((((((.((..........)))))))))).)..)).)))))...))..)))...	76	50	-23.5	1.75001	2.65004	0	3.46999	0.819882	2.55272	0	0	1.73352	0	1.24064	0	low
347	339	PC-3p-105927_7	TCTTGGACCCCTTCTCACAGG	21	15	+	152956474	152956559	ccaggcagcttctccttcgagaaggggctcattcagactctggagtcggccggTCTTGGACCCCTTCTCACAGGacaagcgcccag	0						3'	New	gp4	...(((.((((.((((..(((((((((..((...(((((..((......)))))))))..)))))))))..)))).)))))))...	80	61.6	-40.3	3.50002	0	0	0	0	0	2.31149	2.15502	0.86676	0	2.48129	0.677767	low
402	394	PC-5p-159601_4	ACGAGCGACGTGTGGCCTTGTTCT	24	15	-	154997078	154997161	gaaggaggcggACGAGCGACGTGTGGCCTTGTTCTgcacggcttctcgatgccagcaaggcgcggctgcttgtccgtatctgac	0						5'	New	gp4	...(((..((((((((((.(((...((((((((..((((((....))).))).)))))))))))..))))))))))..)))...	78	63.1	-39.2	0	0	0	1.735	0	0	0	2.15502	0	3.04285	0	0	low
169	161	PC-3p-464882_2	AGAGGAACTAAATGAAGCT	19	16	-	2424997	2425101	ctaaattaatcttccatgtgaatatatcttagcgtcaagtatttcagttactacAGAGGAACTAAATGAAGATaaatattcacaaagtgtttagttttgattact	0						3'	New	gp4	((((((....(((...((((((((((((((..(((..(((..(((.((....)).)))..)))..)))))))))..))))))))))).))))))...........	94	27.6	-16.6	3.50002	1.32502	0	0	1.63976	0	0	0	0	0	0	0	low
265	257	PC-5p-131730_5	GGATGTTCTGATGCTGTT	18	16	-	34095075	34095156	tttactGGATGTTCTGATGTTGTTgtggcttccttctttgcccccatgggtcaggctcactggacattcttgcacatctcat	0						5'	New	gp4	......((((((...((((((...(((((((........((((....)))).)))).)))..)))))).....))))))...	73	47.6	-18.3	5.25002	0	2.06363	0	0	1.27636	0	0.718339	0	0	0.620322	0	low
384	376	PC-3p-132653_5	ACTGACTCTGTGCTTGTGTGTTC	23	16	+	34240972	34241045	caatcgtgaacacatttgtggtcatttcttattctgccctaatgaACTGACTCTGTGCTTGTGTGTTCagaagc	0						3'	New	gp4	...((.(((((((((..(((((((.((((((........))).))).)))))....))..)))))))))))...	68	41.9	-19.6	0	0	0	0	0.819882	0	0	2.87336	0	3.04285	1.24064	1.35553	low
69	89	ssc-miR-218b_R-1	TTGTGCTTGATCTAACCATGT	21	16	+	59686621	59686716	cgccgcggggctttcctTTGTGCTTGATCTAACCATGTggtggaacgatggaaacggaacatggttctgtcaagcaccgcggaaagctccgcgctc	23	ssc-mir-218b,ssc-mir-218-1,ssc-mir-218-2,bta-mir-218-2,bta-mir-218-1,eca-mir-218-1,eca-mir-218-2,cfa-mir-218-2,cfa-mir-218-1,hsa-mir-218-1,hsa-mir-218-2,mml-mir-218-1,mne-mir-218-1,lca-mir-218,sla-mir-218-2,cgr-mir-218a,mmu-mir-218-1,mmu-mir-218-2,rno-mir-218a-1,mdo-mir-218-1,mdo-mir-218-2,oan-mir-218-2,oan-mir-218-1,	ssc-mir-218-2	agattttctgTTGTGCTTGATCTAACCATGTGgttgccaggtatgagtaaaacATGGTTCTGTCAAGCACCATGgaacgtca	ssc-miR-218b	TTGTGCTTGATCTAACCATGTG	5'	Diff	gp2	.(.(((((((((((((...(((((((((..((((((((..........((....))..))))))))..)))))))))...))))))))))))))..	93	57.3	-51.7	1.75001	2.65004	0	2.6025	3.68947	3.82909	8.86071	3.95086	1.73352	6.0857	7.44387	2.71107	low
237	229	PC-3p-43802_28	TCTCTCTGCAGGCTGTACCAGT	22	16	+	77785910	77786015	accgtttttgcactctccctgctggtatccgagcatgcggaggtggctctgaacgtgtcccggcTCTCTCTGCAGGCTGTACCAGTcggttaagctgctctactcc	0						3'	New	gp4	...((....(((((...((..(((((((...(((.(((((((..((((..((.....))..))))..))))))).))))))))))..))...)).)))...))...	100	58.5	-37.5	1.75001	2.65004	3.09544	5.20499	0	0	1.54099	2.15502	0.86676	7.09998	4.96258	1.35553	low
436	428	PC-5p-39941_32	TTCCTTGACTAGATGTTGTAGA	22	16	+	78195928	78196038	gctcagtttTTCCTTGACTAGATGTTGTAGGgcttggcaactcttgttaaatttcacaggtctcgtcgcttgctgggagtctgctatattgttgttaaggtaattcctgtc	0						5'	New	gp4	...(((.....(((((((..(((((.(((((.((..((((..(((((........))))).........))))..))..))))).)))))...)))))))......)))..	106	43.2	-29.2	8.75004	7.95013	3.09544	3.46999	5.73917	3.82909	3.85248	6.46505	6.93408	1.01428	1.24064	1.35553	low
193	185	PC-5p-141686_5	AATAAGATGAACAGCTGTATACCT	24	17	-	14871134	14871239	cattcatttaatacacAATAAGATGAACAGCTGTATACCTattgaaaaccaagcttttttaaaaataggTATGCAGATGTTCATCTTATtgtgtattaaatgaccc	0						5'	New	gp4	...((((((((((((((((((((((((((.(((((((((((((....................))))))))))))).))))))))))))))))))))))))))...	100	29.2	-54.4	0	0	2.06363	0	0	0	2.31149	0	1.73352	5.07142	1.24064	0.677767	low
27	36	ssc-miR-103	AGCAGCATTGTACAGGGCTATGA	23	17	-	36149738	36149839	gcagcagagctctttgtgctttcAGCTTCTTTACAGTGCTGCCTTGtagcattcaggtcaAGCAGCATTGTACAGGGCTATGAaagaactaagaacggcctt	27	ssc-mir-103-2,ssc-mir-103-1,ssc-mir-107,bta-mir-103-2,bta-mir-103-1,bta-mir-107,oar-mir-103,eca-mir-103,eca-mir-107a,cfa-mir-103-2,cfa-mir-103-1,cfa-mir-107,hsa-mir-103a-1,hsa-mir-103a-2,ptr-mir-103-2,cgr-mir-103,cgr-mir-107,mmu-mir-103-2,mmu-mir-103-1,mmu-mir-107,rno-mir-107,mdo-mir-103-2,mdo-mir-103-1,mdo-mir-107,oan-mir-103-1,oan-mir-103-2,oan-mir-107,	ssc-mir-103-1	cttactgccctcggcttctttacagtgctgccttgttgcatatggatcaAGCAGCATTGTACAGGGCTATGAaggcactgag	ssc-miR-103	AGCAGCATTGTACAGGGCTATGA	3'	Yes	gp2	...((.....((((.((.((((((((.(((.(((((((((((((((.......))))....))))))))))).))))))..))))).)).))))...))...	96	47.1	-33.1	65854.6	55054	72563.8	69840.6	55733.9	45621.7	64478.6	74436.8	69019.7	77913.2	67065.5	53684.9	high
470	462	PC-3p-123871_6	TCTACAGTGGCTGTGGCTCT	20	17	+	36960918	36960990	nnnatggggcttcccttgtggctcacagcgtcacttctctgcgttgccTCTACAGTGGCTGTGGCTCTatccc	0						3'	New	gp4	...((((((((..((((((((....(((((.((......)))))))...)))))).))....))))))))...	67	56.2	-20.9	1.75001	0	1.03181	3.46999	2.45964	0	0.770496	0.718339	0	1.01428	2.48129	1.35553	low
329	321	PC-5p-469843_2	AAGAGAGCTTAAACGACTC	19	17	-	37059659	37059757	acaaagtgctatgAAGAGAGCTTAAAAGACTCactatactggtnnnnnnnnaggcatgaaggtgagatattggcagtttaaattaatatggtacttagg	0						5'	New	gp4	...((((((((((((..(((((...((..((((((......((..........)).....))))))...))...)))))...))..))))))))))...	93	33.3	-16.3	0	0	0	3.46999	0	0	0	0	0	0	0	0	low
274	266	PC-5p-160984_4	TTGGGGAGGCATTTGGAGATGAGG	24	17	-	42877690	42877783	aatTTGGGGAGGCATTTGGAGATGAGGgcctgtggagagtgggctgagcggccgtacctaagccctggccctctcccctttgtttccccagtgg	0						5'	New	gp4	...(((((((..((...((.((.(((((((.((..((.(((((((....)))).)))))..))...))))))))).))..))..)))))))...	88	60.6	-46.4	0	7.95013	0	0	0	0	0	0	0	0	0	0	low
445	437	PC-5p-90528_9	CCTGTTGCTACCTCTCTGAATT	22	17	+	43498921	43499067	gtcctttgccatctaagtcactctgaagggttgtgaaaccaagtgCCTGTTGCTACCTCTCTGAATTggcatagagcgtagaTCTCAGAGAGGTGGCAACAGACAtcccatttcactccttctgctcagagtgatattgtggcagag	0						5'	New	gp4	...(((((((((....((((((((((((((..((((((....(((.((((((((((((((((((((..((.......))..)).)))))))))))))))))).)))....)))))).))))....))))))))))...)))))))))	144	48.3	-72.4	0	3.97506	0	1.735	0	0	0.770496	1.43668	1.73352	1.01428	0.620322	2.0333	low
87	111	ssc-miR-499-5p	TTAAGACTTGCAGTGATGTTT	21	17	+	43571140	43571232	gcaccctgggcgggcggccgTTAAGACTTGCAGTGATGTTTaactcctctccacgtgAACATCACAGCAAGTCTGTGCTgcttcccgtcccca	14	ssc-mir-499,bta-mir-499,eca-mir-499,cfa-mir-499,hsa-mir-499a,ptr-mir-499,ppy-mir-499,ggo-mir-499a,mml-mir-499,cgr-mir-499,mmu-mir-499,rno-mir-499,mdo-mir-499,oan-mir-499,	ssc-mir-499	tgggcgggcggccgTTAAGACTTGCAGTGATGTTTaactcctctccacgtgAACATCACAGCAAGTCTGTGCTgcttccc	ssc-miR-499-5p	TTAAGACTTGCAGTGATGTTT	5'	Yes	gp2	.......(((((((..((.((..((((((((.((((((((((.............)))))))))).))))))))..)).))..)))))))...	83	58.1	-43.3	1478.76	1542.32	1905.76	2516.61	1476.61	1710.96	1282.11	1428.78	1836.66	1121.8	1519.79	2482.32	middle
87	112	ssc-miR-499-3p	AACATCACAGCAAGTCTGTGCT	22	17	+	43571140	43571232	gcaccctgggcgggcggccgTTAAGACTTGCAGTGATGTTTaactcctctccacgtgAACATCACAGCAAGTCTGTGCTgcttcccgtcccca	14	ssc-mir-499,bta-mir-499,eca-mir-499,cfa-mir-499,hsa-mir-499a,ptr-mir-499,ppy-mir-499,ggo-mir-499a,mml-mir-499,cgr-mir-499,mmu-mir-499,rno-mir-499,mdo-mir-499,oan-mir-499,	ssc-mir-499	tgggcgggcggccgTTAAGACTTGCAGTGATGTTTaactcctctccacgtgAACATCACAGCAAGTCTGTGCTgcttccc	ssc-miR-499-3p	AACATCACAGCAAGTCTGTGCT	3'	Yes	gp2	.......(((((((..((.((..((((((((.((((((((((.............)))))))))).))))))))..)).))..)))))))...	83	58.1	-43.3	12.2501	11.9252	11.3499	41.6399	20.497	20.4218	14.6394	9.3384	8.6676	14.2	8.68451	14.2331	middle
151	143	PC-3p-26235_58	CGGCGGCGGGTCCGGCCG	18	17	-	43785310	43785387	nntggcatcccggcggcaggagcccgggccgcccaggctgcgatggcggcggCGGCGGCGGCTCCGGCCGggtcctcc	0						3'	New	gp4	...((...((((((....((((((...((((((...(((((....)))))...)))))))))))).)))))).))...	72	82.1	-45.6	1.75001	5.30008	4.12725	10.41	3.27953	11.4873	5.39347	2.87336	10.4011	0	5.5829	0.677767	middle
361	353	PC-3p-338522_2	GAGCTGGGGGTTGGAGTA	18	17	-	47534638	47534718	tctgcagctgcccgacttgcctttccaccctagattggatctgtcctgGAGCTGGGGGTGGGAGTAgcccggtgctgtgac	0						3'	New	gp4	...(((((...(((..((((..(((((((((((...(((....))).....)).)))))))))))))..))).)))))...	75	61.7	-30.3	0	0	0	0	0	3.82909	0	0	0	0	0	0	low
190	182	PC-3p-172374_4	AGGTGTACACATCTGGCCTGA	21	17	-	53638178	53638297	tattgcgaaagggaagactttggggctgggttcaggccagttgcccttcccttggttgatattcgggcaAGGTGTACACATCTGGCCTGAactgagttcccatctcaactctccgcatca	0						3'	New	gp4	...((((..((((..((...(((((((..(((((((((((.(((((((.(((..((....))..))).)))).))).....)))))))))))..))).))))..))..)))).))))...	114	52.5	-49.4	0	1.32502	0	3.46999	0	0	1.54099	0	0.86676	0	0	0	low
389	381	PC-5p-167904_4	CCCCTCAGGCTGTCTGTGGAGC	22	17	+	56848240	56848302	ctcatCCCCTCAGGCTGTCTGTGGAACactgtccagttctccacagacagcctgagagatcct	0						5'	New	gp4	...(((..(((((((((((((((((..(((....)))..))))))))))))))))).)))...	57	55.6	-37.6	0	0	0	3.46999	1.63976	0	0.770496	0	0	0	0.620322	0.677767	low
362	354	PC-5p-131804_5	CAACCTCCCATTGTGACCTCTGC	23	17	-	57847399	57847506	cctgtagggcaaggactgtaCAACCTCCCATTGTGACCTCTGCcaccgactctaaggatggagctgaagtcggagtggggggtggcccattccatgccaccctacagc	0						5'	New	gp4	.((((((((((.(((.((....((((((((((..(((.((..(((((........)).)))....)).)))..))))))))))....)).))).))))...)))))).	106	59.3	-46.2	0	0	0	1.735	0	0	3.08198	0.718339	0	2.02857	0.620322	0.677767	low
352	344	PC-5p-122267_6	TCCCGTGGATTCTGAGGCT	19	17	+	62101823	62101923	nnggctgctcattccctggaTCCCGTGGAGTCTGAGGCTgagcctccccgctggatggtgctgctggctggactccatgttcagggagggcaagaggcagg	0						5'	New	gp4	...(((((((..((((((((...((((((((((..(((...((((((.....))).)))...)))....)))))))))))))))))))))))....))...	95	63.4	-44.8	1.75001	0	0	0	3.27953	3.82909	0.770496	0	1.73352	0	0	0.677767	low
149	141	PC-3p-347666_2	ACCCCCGTGCTGGCGGAGCG	20	17	+	68796597	68796663	ggagggaccacagctcaggccggggggtgcgcagatgcctcACCCCCGTGCTGGCTGAGCGcccaca	0						3'	New	gp4	...(((....(((((..(((((((((....((....))....)))))).))))))))....)))...	61	73.1	-32	0	0	0	3.46999	0	0	0	0	0	0	0	0	low
163	155	PC-5p-363300_2	TCTGTATTTCGGCGAGGGCACC	22	18	-	7730000	7730101	tgtgagcacagacccTCTGTATTTCGGCGAGGGCACCcgcctgacagtgctaggtgagcaaggtggtgtcctggggctccacggaggggagtgaggctcttg	0						5'	New	gp4	...((((.((..((((((((.....(((.((((((((.((((.....((((.....))))))))))))))))...)))..))))))))...))..))))...	96	62.7	-42.1	0	0	0	0	0	0	0	0	0	3.04285	0	0	low
120	112	PC-5p-301914_2	AGGCTTGAATCTGGCAGAGG	20	18	+	8491822	8491920	agattccaggaagggaagtggAGGCTTGAAGCTGGCAGAGGccgaaggcaactctctgggcctcaggctgttgggcctgggctctgaagactggagaga	0						5'	New	gp4	...((((((....((.(((..(((((..(((((....((((((((((....)).))..)))))).)))).)..)))))..))))).....))))))...	93	59.6	-39.2	0	0	0	0	0	0	3.08198	0	0	0	0	0	low
282	274	PC-5p-63048_16	AAGTCCCTGCCCTTTGTAC	19	18	-	15373496	15373557	ttaggaaaAAGTCCCTGCCCTTTGTGCctcactcagaagactagggaagggattgatccacg	0						5'	New	gp4	...(((...(((((((.((((..((...((.....))..)).)))).)))))))..)))...	56	50	-20.3	0	1.32502	1.03181	1.735	2.45964	5.10545	2.31149	0	0	1.01428	0.620322	0.677767	low
114	140	ssc-mir-4337-p3	AGTGAAGGCTTATATATCTTGT	22	18	-	16109968	16110069	tgccctatgtatgggcactagaCAGGGTATATAAGCCTTCACTGGttaaatcaacatacAGTGAAGGCTTATATATCTTGTctagtgcccacacatgggaac	1	ssc-mir-4337,	ssc-mir-4337	ggcactagacAGGGTATATAAGCCTTCACTGGttaaatcaacatacagtgaaggcttatatatcttgtctagtgccca	ssc-mir-4337-p3	agtgaaggcttatatatcttgt	3'	New	gp2	...(((((((.(((((((((((((((((((((((((((((((((..............))))))))))))))))))))))))))))))))).)))))))...	96	43.1	-71	66.5003	90.1014	61.9088	53.7849	86.0876	80.4108	98.6235	69.6789	97.9439	74.0427	71.337	108.443	middle
458	450	PC-5p-58666_18	CACCTGCCCTCTGCACGTGGG	21	18	-	18582954	18583067	aggggagatgggacacttggtaatgtctgcggCACCTGCCCTCTGCACGTGGGctgtgaggatgggtagcccagggcaggggtcaggaaccctgggcttacttctagatccaca	0						5'	New	gp4	...(((..((((......(((((.((((..((..((((.(((((((...(((((((..........)))))))..))))))).))))..))..)))))))))))))..)))...	108	60.5	-46.4	7.00003	3.97506	13.4136	1.735	9.83858	6.38181	5.39347	0	11.2679	7.09998	5.5829	0	middle
12	15	cgr-miR-29b-5p_R-1	GCTGGTTTCATATGGTGGTTTAG	23	18	+	19034815	19034908	caagcttcttcaggaaGCTGGTTTCATATGGTGGTTTAGatttaaaaagtgattgtcTAGCACCATTTGAAATCAGTGTTcttgggggagccca	25	ssc-mir-29b-2,ssc-mir-29b-1,ssc-mir-29c,bta-mir-29b-1,bta-mir-29b-2,bta-mir-29e,bta-mir-29d,eca-mir-29c-2,cfa-mir-29b-1,cfa-mir-29b-2,cfa-mir-29c-1,ptr-mir-29c,ggo-mir-29c,cgr-mir-29b,cgr-mir-29c,mmu-mir-29b-1,rno-mir-29b-1,mdo-mir-29b-1,mdo-mir-29b-2,mdo-mir-29a-1,mdo-mir-29a-2,oan-mir-29b-2,oan-mir-29b-1,oan-mir-29a-1,oan-mir-29a-2,	cgr-mir-29b	ccttcaggaaGCTGGTTTCATATGGTGGTTTAGAtttaaatagtgattgtcTAGCACCATTTGAAATCAGTGTTcttggtgga	cgr-miR-29b-5p	GCTGGTTTCATATGGTGGTTTAGA	5'	Diff	gp2	...(((((..((((((((((((((((.((((((..((((((.............)))))))))))).)))))))))).))))))..)))))...	88	41.5	-42	10.5	11.9252	6.19088	6.93999	12.2982	5.10545	5.39347	13.6484	7.80084	13.1857	8.06419	14.2331	middle
12	16	ssc-miR-29b	TAGCACCATTTGAAATCAGTGTT	23	18	+	19034815	19034908	caagcttcttcaggaaGCTGGTTTCATATGGTGGTTTAGatttaaaaagtgattgtcTAGCACCATTTGAAATCAGTGTTcttgggggagccca	25	ssc-mir-29b-2,ssc-mir-29b-1,ssc-mir-29c,bta-mir-29b-1,bta-mir-29b-2,bta-mir-29e,bta-mir-29d,eca-mir-29c-2,cfa-mir-29b-1,cfa-mir-29b-2,cfa-mir-29c-1,ptr-mir-29c,ggo-mir-29c,cgr-mir-29b,cgr-mir-29c,mmu-mir-29b-1,rno-mir-29b-1,mdo-mir-29b-1,mdo-mir-29b-2,mdo-mir-29a-1,mdo-mir-29a-2,oan-mir-29b-2,oan-mir-29b-1,oan-mir-29a-1,oan-mir-29a-2,	ssc-mir-29b-1	cttcaggaagctggtttcatatggtggtttagatttaaaaagtgattgtcTAGCACCATTTGAAATCAGTGTTcttggggg	ssc-miR-29b	TAGCACCATTTGAAATCAGTGTT	3'	Yes	gp2	...(((((..((((((((((((((((.((((((..((((((.............)))))))))))).)))))))))).))))))..)))))...	88	41.5	-42	4823.9	4723.04	3127.43	3826.54	4734.41	6522.21	3855.95	3608.22	3994.46	3377.06	5441.16	7586.92	middle
13	17	cgr-miR-29a-5p_R-1	ACTGATTTCTTTTGGTGTTCAGA	23	18	+	19035233	19035302	aggatgACTGATTTCTTTTGGTGTTCAGAgtcaatataattttcTAGCACCATCTGAAATCGGTTataat	30	ssc-mir-29a,ssc-mir-29c,ssc-mir-29b-2,ssc-mir-29b-1,bta-mir-29a,bta-mir-29d,bta-mir-29b-1,bta-mir-29b-2,eca-mir-29a,eca-mir-29c-2,cfa-mir-29a,cfa-mir-29c-1,cfa-mir-29b-1,cfa-mir-29b-2,ptr-mir-29c,ggo-mir-29c,cgr-mir-29a,cgr-mir-29c,cgr-mir-29b,mmu-mir-29a,mmu-mir-29b-1,rno-mir-29b-1,mdo-mir-29a-1,mdo-mir-29a-2,mdo-mir-29b-2,mdo-mir-29b-1,oan-mir-29a-1,oan-mir-29a-2,oan-mir-29b-2,oan-mir-29b-1,	cgr-mir-29a	ttagaggatgACTGATTTCTTTTGGTGTTCAGAGtcaatagaattttcTAGCACCATCTGAAATCGGTTataatgatt	cgr-miR-29a-5p	ACTGATTTCTTTTGGTGTTCAGAG	5'	Diff	gp2	...((((((((((((...(((((((.((((...........)))))))))))...))))))))))))...	64	32.9	-26	182.001	162.978	93.895	130.125	200.051	264.207	128.673	120.681	136.948	72.0141	155.081	270.429	middle
13	18	ssc-miR-29a_L-1R-1	TAGCACCATCTGAAATCGGTT	21	18	+	19035233	19035302	aggatgACTGATTTCTTTTGGTGTTCAGAgtcaatataattttcTAGCACCATCTGAAATCGGTTataat	30	ssc-mir-29a,ssc-mir-29c,ssc-mir-29b-2,ssc-mir-29b-1,bta-mir-29a,bta-mir-29d,bta-mir-29b-1,bta-mir-29b-2,eca-mir-29a,eca-mir-29c-2,cfa-mir-29a,cfa-mir-29c-1,cfa-mir-29b-1,cfa-mir-29b-2,ptr-mir-29c,ggo-mir-29c,cgr-mir-29a,cgr-mir-29c,cgr-mir-29b,mmu-mir-29a,mmu-mir-29b-1,rno-mir-29b-1,mdo-mir-29a-1,mdo-mir-29a-2,mdo-mir-29b-2,mdo-mir-29b-1,oan-mir-29a-1,oan-mir-29a-2,oan-mir-29b-2,oan-mir-29b-1,	ssc-mir-29a	ccccttagaggatgactgatttcttttggtgttcagagtcaatataattttCTAGCACCATCTGAAATCGGTTAtaatgattgggg	ssc-miR-29a	CTAGCACCATCTGAAATCGGTTA	3'	Diff	gp2	...((((((((((((...(((((((.((((...........)))))))))))...))))))))))))...	64	32.9	-26	49984.6	51440	30266.7	35378.3	49854.1	58499.5	35934.8	33382.6	34739.8	22694.1	34821.5	51501.5	high
77	99	ssc-miR-335	TCAAGAGCAATAACGAAAAATG	22	18	-	19337960	19338041	ttttgggcgggggTCAAGAGCAATAACGAAAAATGtttgtcataaaccgTTTTTCATTATTGCTCCTGACctcctctcattt	11	ssc-mir-335,bta-mir-335,eca-mir-335,cfa-mir-335,hsa-mir-335,ptr-mir-335,ppy-mir-335,ggo-mir-335,mml-mir-335,mmu-mir-335,rno-mir-335,	ssc-mir-335	cttttgggcgggggTCAAGAGCAATAACGAAAAATGtttgtcataaaccgtttttcattattgctcctgacctcctctca	ssc-miR-335	TCAAGAGCAATAACGAAAAATG	5'	Yes	gp2	...((((.((((((((.(((((((((.((((((((.((......)).)))))))).))))))))).)))))))).))))...	76	40.2	-39.5	276.501	210.678	139.295	147.475	137.74	117.425	74.7381	149.414	150.816	80.1284	159.423	228.407	middle
77	100	hsa-miR-335-3p_R-1	TTTTTCATTATTGCTCCTGAC	21	18	-	19337960	19338041	ttttgggcgggggTCAAGAGCAATAACGAAAAATGtttgtcataaaccgTTTTTCATTATTGCTCCTGACctcctctcattt	11	ssc-mir-335,bta-mir-335,eca-mir-335,cfa-mir-335,hsa-mir-335,ptr-mir-335,ppy-mir-335,ggo-mir-335,mml-mir-335,mmu-mir-335,rno-mir-335,	hsa-mir-335	tgttttgagcgggggTCAAGAGCAATAACGAAAAATGTttgtcataaaccgTTTTTCATTATTGCTCCTGACCtcctctcatttgctatattca	hsa-miR-335-3p	TTTTTCATTATTGCTCCTGACC	3'	Diff	gp2	...((((.((((((((.(((((((((.((((((((.((......)).)))))))).))))))))).)))))))).))))...	76	40.2	-39.5	287.001	331.255	528.288	189.115	337.791	241.232	108.64	438.905	240.093	88.2426	352.343	394.46	middle
105	131	rno-mir-3553-p5	TTATGGCCCTTCGGTAATTCACT	23	18	-	20030686	20030763	tgctctgtTTATGGCCCTTCGGTAATTCACTgaccgagactgttcacaGTGAATTCTACCAGTGCCATACAcagaaca	1	rno-mir-3553,	rno-mir-3553	cggatctgtctctgctctgtttatggcccttcggtaattcactgaccgagactgttcaCAGTGAATTCTACCAGTGCCATAcacaggacaggagtcacactctctg	rno-mir-3553-p5	ttatggcccttcggtaattcact	5'	New	gp2	.(.(((((.((((((.((..((((((((((((...(((....))).))))))))..)))))).)))))).))))).).	76	46.2	-28.1	22.7501	21.2003	14.4454	19.085	20.497	24.2509	15.4099	11.4934	24.2693	19.2714	17.369	32.5328	middle
143	135	PC-5p-111978_7	TTTCTGTTATGAGAACATT	19	18	-	24537812	24537931	ggtccacatttatggctgactTTTCTGTTATGAGAACATTcttgacccactggacatctccattcttcttcagaatctcacatacagagttcttcaaattgtccataataatcaccgtgg	0						5'	New	gp4	(((......((((((((((...((((((..(((((...((((.((.....((((....)))).......)))))))))))...))))))....)))....).)))))).....)))....	116	40	-23.3	3.50002	6.6251	1.03181	0	4.09941	5.10545	1.54099	0.718339	3.46704	1.01428	0.620322	0.677767	low
467	459	PC-5p-342995_2	GCCTGCAGACCCTCTGTGCCAT	22	18	+	40654326	40654385	cGCCTGCAGACCCTCTGTGCCAGgcaggcaggccaaggcacaaagcacggtctgcagaac	0						5'	New	gp4	...(((((((((((.((((((.(((......)))..)))))).))...)))))))))...	54	65	-31.8	0	0	0	3.46999	0	0	0	0	0	0	0	0	low
440	432	PC-3p-56957_19	GGTGCAGATCTTGGTGGTA	19	18	+	40661643	40661785	agtcacatccagatgaccggggaagggaccaaggcatgtgcactgcaagatgctcccccttgatcctgacagtctgtcctGGTGGAGATCTTGGTGGTAgcatacgcctgagttacttcattttcctcttttttgctactgct	0						3'	New	gp4	.((((........)))).(((((((..((..((((.(((((((..((((((.((((.((..(((...........)))..)).))))))))).)..)).))))).))))..))..))))....)))........((....)).	108	51	-43.9	5.25002	5.30008	6.19088	5.20499	0.819882	5.10545	0.770496	0.718339	0.86676	1.01428	1.24064	0.677767	low
442	434	PC-3p-201962_3	ACAATCGAAGAATGAGGAC	19	18	-	46675556	46675635	gaggccagatatcctctctttgaaggtcaagaaactgggaaaaaagagACAATCGAAGAATGAGGACatttttggcaact	0						3'	New	gp4	...((((((..((((((((((((..(((...................)))..)))))))..)))))....))))))....	73	41.2	-24	3.50002	3.97506	0	0	0.819882	0	0.770496	0.718339	2.60028	0	1.24064	2.0333	low
334	326	PC-5p-233032_3	AAGGGCAGAGATCAAACT	18	18	+	47145862	47145944	gggtggaggaaacAAGGGCAGAGATCAAACAagcagatgagacaaagtgaattgaatttgcctttgaagcgtgttctccaagt	0						5'	New	gp4	...(((((((..((((((((((..((((....((............))...)))).)))))))))).......)))))))...	77	44.6	-22.1	0	0	3.09544	0	0	0	0	0	0	0	0	0	low
58	76	ssc-miR-196b-5p	TAGGTAGTTTCCTGTTGTTGGG	22	18	+	49836538	49836627	cagaactggtcggtgattTAGGTAGTTTCCTGTTGTTGGGatccacctttctcTCGACAGCACGACACTGCCTTCattacttcagttgaa	21	ssc-mir-196b-1,ssc-mir-196b-2,ssc-mir-196a-2,bta-mir-196b,bta-mir-196a-2,eca-mir-196b,cfa-mir-196b,cfa-mir-196a-2,hsa-mir-196b,hsa-mir-196a-2,ptr-mir-196b,mml-mir-196b,age-mir-196,lla-mir-196,cgr-mir-196b,cgr-mir-196a,rno-mir-196a,mdo-mir-196a,mdo-mir-196b,oan-mir-196b,oan-mir-196a,	ssc-mir-196b-2	gtcggtgattTAGGTAGTTTCCTGTTGTTGGGatccacctttctctCGACAGCACGACACTGCCTTCAttacttcagt	ssc-miR-196b-5p	TAGGTAGTTTCCTGTTGTTGGG	5'	Yes	gp2	...((((((..((((((..(((((((.((.(((((((((((..........))))))))))).)).)))))))..))))))))))))...	84	46.7	-36.3	105.875	88.7764	97.5063	91.0874	67.2303	42.12	92.0743	84.4048	90.5764	112.585	75.3691	77.6043	middle
58	77	ssc-miR-196b-3p_L+1R-1	TCGACAGCACGACACTGCCTTC	22	18	+	49836538	49836627	cagaactggtcggtgattTAGGTAGTTTCCTGTTGTTGGGatccacctttctcTCGACAGCACGACACTGCCTTCattacttcagttgaa	21	ssc-mir-196b-1,ssc-mir-196b-2,ssc-mir-196a-2,bta-mir-196b,bta-mir-196a-2,eca-mir-196b,cfa-mir-196b,cfa-mir-196a-2,hsa-mir-196b,hsa-mir-196a-2,ptr-mir-196b,mml-mir-196b,age-mir-196,lla-mir-196,cgr-mir-196b,cgr-mir-196a,rno-mir-196a,mdo-mir-196a,mdo-mir-196b,oan-mir-196b,oan-mir-196a,	ssc-mir-196b-2	gtcggtgattTAGGTAGTTTCCTGTTGTTGGGatccacctttctctCGACAGCACGACACTGCCTTCAttacttcagt	ssc-miR-196b-3p	CGACAGCACGACACTGCCTTCA	3'	Diff	gp2	...((((((..((((((..(((((((.((.(((((((((((..........))))))))))).)).)))))))..))))))))))))...	84	46.7	-36.3	5.25002	1.32502	1.54772	4.33749	0.409941	2.55272	3.08198	2.15502	0.43338	1.01428	0.930483	1.69442	low
138	130	PC-3p-69863_14	AGGTGCCTCGGCTGCCTGTT	20	18	+	50641824	50641899	tttcaggggaacagggcaactcagaagactgggaaacacacggtcctcctggatgAGGTGCCTCTGCTGCCTGTTt	0						3'	New	gp4	...((((....(((((((.((((((.(((((.........))))).)).....)))).)))).)))...))))...	70	55.3	-24.4	0	0	1.03181	1.735	2.45964	0	0	3.59169	1.73352	0	1.86097	0.677767	low
110	102	PC-5p-108248_7	TTCTGACATCTCTGCAAGGGCTGT	24	18	+	52278124	52278198	ctttctatTTCTGACATCTCTGCAAGGGCTGCgactgagaatccagcctttgaaaggtgcagaagagatggacgc	0						5'	New	gp4	(..(((.((((((.(((((...(((((((((.((.......)))))))))))..))))))))))))))..)....	71	49.3	-28.7	0	0	0	0	2.45964	0	0	3.59169	0	1.01428	2.48129	0	low
261	253	PC-3p-281226_2	TGCAGATTTCCTGTGACACAG	21	18	+	57993352	57993423	aacgcgatctgagtcacagagattgggtggctcctctggggtgcTGCAGATTTCCTGTGACACAGatgttca	0						3'	New	gp4	...((.(((((.((((((((((((..(..((.((.....)).))..).))))).))))))).)))))))...	66	52.8	-30.6	3.50002	0	0	0	0	0	0	0	0	0	0	0	low
221	213	PC-5p-121027_6	CACAAGTTGTTGATATGATGC	21	18	-	60079782	60079888	gcactcagctttctcgttggccCACAAGTTGTTGATATGATGCattcttcttaaagctgtaggcatcacatcatcaacttaagggccagtaagagagaaatgagaaa	0						5'	New	gp4	...((((.((((((..(((((((..((((((.((((.((((((...(((....)))......)))))).)))).))))))..)))))))..))))))...))))...	101	42.1	-43.9	3.50002	2.65004	0	5.20499	0.819882	1.27636	1.54099	0.718339	0	0	1.24064	0	low
133	125	PC-3p-1242938_1	TGGACCCCTGGCCTGGGAACCT	22	GL892378.2	-	110325	110392	gcagggctcccaggagaggtaagatcccaccactggctcctatTGGACCTCTGGCCTGGGAACCTatt	0						3'	New	gp4	...(((.(((((((((((((..(((.(((....))).....)))..))))))..))))))).)))...	62	58.8	-27.1	3.50002	0	1.03181	0	0	1.27636	0.770496	0.718339	0	0	0	0	low
1	1	bta-miR-7	TGGAAGACTAGTGATTTTGTTGTT	24	GL892815.1	+	39663	39771	agactggagtggttgtggtctagtgctgtgTGGAAGACTAGTGATTTTGTTGTTctgacgtactatgacaacaagtcacagcttcctcacagcgtggactcccatcgac	4	bta-mir-7-3,eca-mir-7-2,cfa-mir-7-3,ggo-mir-7-3,	bta-mir-7-3	agactggagcggttgtggtctagtgctgtgTGGAAGACTAGTGATTTTGTTGTTctgatgtactatgacaacaagtcacagc	bta-miR-7	TGGAAGACTAGTGATTTTGTTGTT	5'	Yes	gp1b	........((((....((((((.(((((((.(((((.((.((((.((((((((..((......))..))))))))))))))))))).))))))))))))).))))....	97	48.6	-43.4	5687.53	6059.32	5841.09	3832.61	5294.8	4907.61	6191.71	9084.83	9130.45	8338.42	5347.8	8035.61	high
10	18	ssc-miR-140-5p_L+1	CAGTGGTTTTACCCTATGGTAG	22	GL892841.1	+	107261	107380	gccccgtgtgtgtctgtctctctgtgtcctgcCAGTGGTTTTACCCTATGGTAGgttacgtcatgctgttctACCACAGGGTAGAACCACGGACaggataccggggcaccctctgcatcg	10	ssc-mir-140,bta-mir-140,eca-mir-140,cfa-mir-140,hsa-mir-140,ggo-mir-140,mne-mir-140,cgr-mir-140,rno-mir-140,oan-mir-140,	ssc-mir-140	cctgccAGTGGTTTTACCCTATGGTAGgttacgtcatgctgttcTACCACAGGGTAGAACCACGGACagg	ssc-miR-140-5p	AGTGGTTTTACCCTATGGTAG	5'	Diff	gp1a	((((((.................((((((((((.(((((((((((((.(((((((..(((......)))))))))).))))))))))))))).)))))))))))))).............	78	56.7	-58.2	1816.51	1653.63	1419.77	1823.48	1772.58	1710.33	1128.78	1087.56	1225.6	948.355	1370.91	1769.65	middle
10	19	ssc-miR-140-3p_L-1	ACCACAGGGTAGAACCACGGAC	22	GL892841.1	+	107261	107380	gccccgtgtgtgtctgtctctctgtgtcctgcCAGTGGTTTTACCCTATGGTAGgttacgtcatgctgttctACCACAGGGTAGAACCACGGACaggataccggggcaccctctgcatcg	10	ssc-mir-140,bta-mir-140,eca-mir-140,cfa-mir-140,hsa-mir-140,ggo-mir-140,mne-mir-140,cgr-mir-140,rno-mir-140,oan-mir-140,	ssc-mir-140	cctgccAGTGGTTTTACCCTATGGTAGgttacgtcatgctgttcTACCACAGGGTAGAACCACGGACagg	ssc-miR-140-3p	TACCACAGGGTAGAACCACGGAC	3'	Diff	gp1a	((((((.................((((((((((.(((((((((((((.(((((((..(((......)))))))))).))))))))))))))).)))))))))))))).............	78	56.7	-58.2	17969.1	17172.3	28729.8	17691.8	19287.7	19213.1	24695.9	33182.2	24737.3	31445.8	22929	11324.1	high
322	314	PC-5p-30809_46	CTGTCTCTCTGTGTCCTGC	19	GL892841.1	+	107269	107371	tgtgtCTGTCTCTCTGTGTCCTGCcagtggttttaccctatggtaggttacgtcatgctgttctaccacagggtagaaccacggacaggataccggggcaccc	0						5'	New	gp4	......((((((...((((((((((.(((((((((((((.(((((((..(((......)))))))))).))))))))))))))).)))))))).))))))...	94	54.4	-53.5	8.75004	18.5503	8.2545	1.735	8.19882	8.93454	7.70496	2.87336	1.73352	2.02857	7.44387	3.38884	middle
2	2	bta-miR-26b	TTCAAGTAATTCAGGATAGGTT	22	GL892871.2	+	56006	56081	tgcccgggacccagTTCAAGTAATTCAGGATAGGTTgtgtgctgtccagCCTGTTCTCCATTACTTGGCTcggggg	7	bta-mir-26b,cfa-mir-26b,hsa-mir-26b,ptr-mir-26b,cgr-mir-26b,mmu-mir-26b,rno-mir-26b,	bta-mir-26b	tgcccgggacccagTTCAAGTAATTCAGGATAGGTTgtgtgctgtccagcctgttctccattacttggctcgggggccggtgccc	bta-miR-26b	TTCAAGTAATTCAGGATAGGTT	5'	Yes	gp1b	..((((((.......(((((((((..(((((((((((.........)))))))))))..)))))))))))))))..	72	55.3	-30.7	181938	226817	235725	179970	260852	203286	329323	319384	265069	452005	304625	200021	high
2	3	hsa-miR-26b-3p_R-1	CCTGTTCTCCATTACTTGGCT	21	GL892871.2	+	56006	56081	tgcccgggacccagTTCAAGTAATTCAGGATAGGTTgtgtgctgtccagCCTGTTCTCCATTACTTGGCTcggggg	7	bta-mir-26b,cfa-mir-26b,hsa-mir-26b,ptr-mir-26b,cgr-mir-26b,mmu-mir-26b,rno-mir-26b,	hsa-mir-26b	ccgggacccagTTCAAGTAATTCAGGATAGGTtgtgtgctgtccagCCTGTTCTCCATTACTTGGCTCggggaccgg	hsa-miR-26b-3p	CCTGTTCTCCATTACTTGGCTC	3'	Diff	gp1b	..((((((.......(((((((((..(((((((((((.........)))))))))))..)))))))))))))))..	72	55.3	-30.7	297.501	291.505	346.689	275.865	284.499	210.6	312.051	215.502	281.697	407.742	272.321	330.073	middle
478	470	PC-5p-104196_7	TCTCTCCAGCCTCTGCTTCGTG	22	GL892983.1	-	13358	13429	ttccccggTCTCTCCAGCCTCTGCTTCGTGgggactgagcatcaggagcggtggctggggggaaacgggggg	0						5'	New	gp4	.((((((.(((((((((((.(((((((.(((..........)))))))))).)))))))))))..)))))).	70	68.1	-43.8	0	0	0	0	0	0	20.8034	0	0	7.09998	0.620322	1.35553	middle
142	134	PC-3p-164936_4	CAGCTGGGGCCCCCTCCTTATT	22	GL893339.2	+	77623	77683	gctgacggggagggagccccagctgctgggtcagCAGCTGGGGCCCCCTCCTTATCtggag	0						3'	New	gp4	...((..(((((((.(((((((((((((...))))))))))))).)))))))..)).....	53	70.5	-47.1	0	0	1.03181	3.46999	0	0	0	1.43668	1.73352	0	1.86097	1.35553	low
97	123	hsa-miR-1260a_R+2_1ss9TG	ATCCCACCGCTGCCACCAAT	20	GL893393.2	+	10682	10750	cATCCCACCCCTGCCACCAATcccaaaggcctctctgactcccctgcaggcagtggacagggtgggctt	9	bta-mir-1260b,hsa-mir-1260b,hsa-mir-1260a,ptr-mir-1260b,ppy-mir-1260b,ppy-mir-1260a,ggo-mir-1260b,mml-mir-1260b,cgr-mir-1260,	hsa-mir-1260a	acctttccagctcATCCCACCTCTGCCACCAaaacactcatcgcggggtcagagggagtgccaaaaaaggtaa	hsa-miR-1260a	ATCCCACCTCTGCCACCA	5'	Diff	gp2	...(((((((.((((((....((...(((.............)))...))..)))).)))))))))...	63	63.8	-23.6	1.75001	3.97506	8.2545	6.93999	7.37893	5.10545	3.85248	7.90173	2.60028	7.09998	6.20322	8.81097	low
127	119	PC-5p-267868_2	ATGTCGGAGGGGGCAGGGG	19	GL893528.2	+	5853	5968	cctgggctcgggcactgggtcaATGTCGGAGGCGGCAGGGGtgcgtagagtcctttcctgcttcggcctctcccctttcctcctctctcgtctttccaaccccttctctgtccact	0						5'	New	gp4	..(((((..(((...((((...(((..(((((.((.(((((.....((((.........((....)))))))))))..)).)))))..)))...))))..)))......)))))..	112	62.1	-37.6	0	0	0	0	0	0	3.08198	0	0	0	0	0	low
259	251	PC-5p-190026_3	GAGGAGGAATGAGACGGC	18	GL893637.1	-	8581	8670	aacagggcacggcgtgGAGGAGGAATGAGACGGCggccagagtcttcaggtactcctgccctcgcggctccaccgcgctcgtgtcctttc	0						5'	New	gp4	...((((((((((((((.((((...((((..(((((...(((((.....).)))))))))))))...)))).)))))).))))))))...	84	65.6	-45	0	0	3.09544	1.735	0	0	0	0	0	0	0	0	low
345	337	PC-5p-314846_2	GCAACTTTGGACTTCTTTT	19	GL893739.1	-	11710	11813	aaactCCAACTTTGGACTTCTTTTaatgttagcttgtaagatagataatgggatctagaggaaagcatatatttatatatgaatacccaatttaggttggagaa	0						5'	New	gp4	...((((((((((((..(((....(((((..((((......(((((......))))).....))))..))))).......)))...))))....))))))))..	99	30.8	-23.2	0	0	0	3.46999	0	0	0	0	0	0	0	0	low
216	208	PC-3p-184258_3	ATGAGAACTGAAATAGCTT	19	GL893818.1	-	52680	52748	ttatttcagctaaggccagtctaatccaatctaatgcttattggATTAGAACTGAAATAGCTTagaact	0						3'	New	gp4	...(((.(((((....((((((((((((((.........))))))))))).)))...))))).)))...	63	33.3	-19.8	0	0	0	0	0	3.82909	0	0	1.73352	0	0	0	low
343	335	PC-5p-159310_4	TGGGTGCGTCAGGCTGTT	18	GL893822.2	-	147965	148037	aagctgggcTGGGTGGGTCAGGCTGTTcttgctggtttacctcaaagcacacgttcctatccatgtccagggt	0						5'	New	gp4	...((((((((((((((....(((((.(((...((....))...))).))).)).)))))))).))))))...	67	54.8	-27.6	0	0	0	19.9525	0	0	0	0	0	0	0	0	middle
84	76	PC-5p-378466_2	GAGGGTCCATTTTGTTGGC	19	GL893932.1	+	25739	25820	taagctgacctcatggcaGAGGTTCCATTTTGTTGGCaaaaatgttcaaagagaatgctgcacgtctttggaggtcggtagc	0						5'	New	gp4	...(((((((((..(((....((..((((((.((((((....)).))))..))))))..))..)))....)))))))))...	76	46.3	-25	0	0	0	3.46999	0	0	0	0	0	0	0	0	low
3	4	cfa-miR-33a	GTGCATTGTAGTTGCATTGC	20	GL894144.1	+	30048	30099	GTGCATTGTAGTTGCATTGCaTGTTCTGGCAGTACCCGTGcagtgtttccac	1	cfa-mir-33a,	cfa-mir-33a	GTGCATTGTAGTTGCATTGCatgttctggcggtacccgtgcaatgtttccacagtgcatca	cfa-miR-33a	GTGCATTGTAGTTGCATTGC	5'	Yes	gp1b	.............((((((((((....((.....))))))))))))......	33	50	-12.2	1025.5	934.14	800.687	1320.33	1122.42	1409.1	782.824	466.202	567.728	348.913	593.028	927.863	middle
3	5	cfa-mir-33a-p3_1ss10GA	TGTTCTGGCAGTACCCGTG	19	GL894144.1	+	30048	30099	GTGCATTGTAGTTGCATTGCaTGTTCTGGCAGTACCCGTGcagtgtttccac	1	cfa-mir-33a,	cfa-mir-33a	GTGCATTGTAGTTGCATTGCatgttctggcggtacccgtgcaatgtttccacagtgcatca	cfa-mir-33a-p3	tgttctggcggtacccgtg	3'	New	gp1b	.............((((((((((....((.....))))))))))))......	33	50	-12.2	0	2.65004	0	0	2.45964	2.55272	1.54099	0	3.46704	1.01428	1.24064	2.0333	low
11	16	hsa-miR-412-5p_R-3	TGGTCGACCAGTTGGAAAGT	20	GL894231.1	-	6715	6804	ctggggtacaggacggaTGGTCGACCAGTTGGAAAGTaattgtttcgaatgtacttcacctggtccactagccgtcggtacccactgcag	4	bta-mir-412,eca-mir-412,hsa-mir-412,ptr-mir-412,	hsa-mir-412	ctggggtacggggatggaTGGTCGACCAGTTGGAAAGTAATtgtttctaatgtACTTCACCTGGTCCACTAGCCGTccgtatccgctgcag	hsa-miR-412-5p	TGGTCGACCAGTTGGAAAGTAAT	5'	Diff	gp1b	...((((((..(((((.((((.((((((.(((..(((((((......))).))))))).)))))).)))).))))).)))))).......	80	53.3	-37.4	5.25002	1.32502	3.09544	0	0	1.27636	0.770496	2.15502	0	2.02857	0.620322	0.677767	low
9	14	cgr-miR-409-3p	GAATGTTGCTCGGTGAACCCCT	22	GL894231.1	-	6877	6936	tacccgagcaactttgcatctggacgacGAATGTTGCTCGGTGAACCCCTtttcggtatc	1	cgr-mir-409,	cgr-mir-409	ctcggagagAGGTTACCCGAGCAACTTTGCATCtggaggacGAATGTTGCTCGGTGAACCCCTtttcggtatc	cgr-miR-409-3p	GAATGTTGCTCGGTGAACCCCT	3'	Yes	gp1b	...(((((((((((((..((.....)))))).)))))))))...(((.......)))...	38	51.7	-17.6	1.75001	6.6251	1.03181	1.735	0.819882	1.27636	6.93447	1.43668	5.20056	5.07142	3.10161	0.677767	low
13	18	bta-miR-485_R-1	AGAGGCTGGCCGTGATGAATTC	22	GL894231.1	-	16587	16689	tatggtacttgaagAGAGGCTGGCCGTGATGAATTCgattcatcaaagcgagtcatacacggctctcctctcttttagtgtcagattctgcctcggagggctt	8	bta-mir-485,oar-mir-485,cfa-mir-485,hsa-mir-485,ptr-mir-485,ggo-mir-485,mmu-mir-485,rno-mir-485,	bta-mir-485	acttgaagAGAGGCTGGCCGTGATGAATTCGattcatcaaagcgagtcatacacggctctcctctcttttagt	bta-miR-485	AGAGGCTGGCCGTGATGAATTCG	5'	Diff	gp1b	..((..(((..((((((((..(((((((((((.((((...........)))))))).)))))))..))))))))..)))..))......((((....))))..	81	48.5	-43.7	0	0	0	0	0	0	0	0	3.46704	0	0	0	low
10	15	bta-miR-411c-5p	GGTTGATCAGAGAACATACATT	22	GL894231.1	-	20894	20985	tggtccatgataggggagtggatGGTTGATCAGAGAACATACATTttctcaatgaTGTATGTCAACTGATCCACAGtccctacctatccagt	2	bta-mir-411c,oar-mir-3959,	bta-mir-411c	gggagtggatGGTTGATCAGAGAACATACATTttgtcaatgaTGTATGTCAACTGATCCACAGTccctccctat	bta-miR-411c-5p	GGTTGATCAGAGAACATACATT	5'	Yes	gp1b	........((((((..((.(((..((.((((((...(((((((((........)))))))))...)))))).))..))))).))))))....	80	43.5	-33.8	0	0	0	1.735	0	0	4.62298	1.43668	3.46704	1.01428	1.86097	0	low
16	21	bta-miR-655	ATAATACATGGTTAACCTCTCT	22	GL894231.1	-	23050	23147	tcagggatatttgaggagaggttatccgtgttatgttcgcttcattcatcatgaATAATACATGGTTAACCTCTTTttgaatatcaaactctgcctcg	7	bta-mir-655,oar-mir-655,eca-mir-655,hsa-mir-655,ptr-mir-655,ppy-mir-655,ggo-mir-655,	bta-mir-655	aactgttcagggatatttgaggagaggttatccgtgttatgttcgcttggctcatcatgaATAATACATGGTTAACCTCTCTttgaatatcagactc	bta-miR-655	ATAATACATGGTTAACCTCTCT	3'	Yes	gp1b	.((((((((((..(..((((((((.((((((..((((((............))))))..)))))).))))))))..)..))))))....)))).....	92	37.8	-34.6	0	0	0	5.20499	0	0	0.770496	0	0	2.02857	1.24064	0	low
16	29	bta-miR-381_1ss10GA	TATACAAGGACAAGCTCTCTGT	22	GL894231.1	-	27135	27247	agcgatggacctgcccagcgctattgtttggtacttaaAGCGAGGTTGCCCTTTGTATATTCgggttttgaggtggaaTATACAAGGACAAGCTCTCTGTgagtatcaaacct	9	ssc-mir-381,bta-mir-381,oar-mir-381,eca-mir-381,hsa-mir-381,ptr-mir-381,ggo-mir-381,cgr-mir-381,rno-mir-381,	bta-mir-381	tactcagagcgaggttgccctttgtatattcggttttttgatgtagaaTATACAAGGGCAAGCTCTCTGTgagta	bta-miR-381	TATACAAGGGCAAGCTCTCTGT	3'	Diff	gp1a	((((.(((......))).))))...((((((((((((.((.(((.(((.((((.((((((((.............)))))))))))).))).))).)).))))))))))))..	86	46	-44.4	5.25002	11.9252	5.15907	119.715	8.19882	8.93454	6.93447	14.3668	2.60028	9.12855	9.30483	0.677767	middle
8	13	bta-miR-376b_R-1	ATCATAGAGGAAAATCCATGT	21	GL894231.1	-	31297	31394	tctttctttggtatttaaaagGTGGATATTCCTTCTATGTTTacgtgattcatagataATCATAGAGGAAAATCCATGTtttcagtatcaaatgctgc	10	bta-mir-376b,oar-mir-376b,eca-mir-376b,cfa-mir-376b,hsa-mir-376b,ptr-mir-376b,ppy-mir-376b,ggo-mir-376b,mmu-mir-376b,rno-mir-376b,	bta-mir-376b	ttctttggtatttaaaagGTGGATATTCCTTCTATGTTTAcgtgattcatagataATCATAGAGGAAAATCCATGTTttcagtatcaaatgct	bta-miR-376b	ATCATAGAGGAAAATCCATGTT	3'	Diff	gp1b	......(((((((((.((((..(((((.(((((.(((((.(((.(((...)))...))).)))))))))).)))))..)))).)))))))))......	86	31.6	-26.7	0	0	0	3.46999	0	0	2.31149	0	0.86676	2.02857	0	0	low
15	28	oar-miR-376c-3p_1ss6AG	AACATGGAGGAAATTCCACGT	21	GL894231.1	-	32021	32132	ggactcagtccttctttggtatttaaaaggtggatattccttctatgtttatgttatttgtggttaAACATAGAGGAAATTCCACGTtttcagtatcaaatgctgcttggaa	9	ssc-mir-376c,ssc-mir-376b,bta-mir-376c,oar-mir-376c,eca-mir-376c,cfa-mir-376c,hsa-mir-376c,ptr-mir-376c,ggo-mir-376c,	oar-mir-376c	atccttctttggtatttaaaagGTGGATATTCCGTCTATGTTTatgttatttatggttaAACATAGAGGAAATTCCACGTtttcagtatcaaatgctgcttggaa	oar-miR-376c-3p	AACATAGAGGAAATTCCACGT	3'	Diff	gp1a	((((...))))...(((((((((.((((.(((((..((((.((((((((((.............))))))))))))))..))))).)))).)))))))))............	86	34.8	-36.6	3.50002	0	1.03181	5.20499	1.63976	0	3.08198	5.74671	0	0	2.48129	0.677767	low
4	6	bta-miR-138	AGCTGGTGTTGTGAATCAGGCCG	23	GL894339.1	-	3060	3169	agttctggtatggttgctgcAGCTGGTGTTGTGAATCAGGCCGacgagcagcgcatcctcttacccgGCTATTTCACGACACCAGGGTtgcatcatacccatcctctcca	9	bta-mir-138-2,eca-mir-138-1,cfa-mir-138b,hsa-mir-138-2,ggo-mir-138,cgr-mir-138,mmu-mir-138-2,rno-mir-138-2,mdo-mir-138,	bta-mir-138-2	gttgctgcAGCTGGTGTTGTGAATCAGGCCGacgagcagcgcatcctcttacccggctatttcacgacaccagggttgcatca	bta-miR-138	AGCTGGTGTTGTGAATCAGGCCG	5'	Yes	gp1b	......(((((((.(((..(..(((((((((((((...(((((..(((.((......)))))...)))))..))))))))))))).)..))))))))))...........	93	54.5	-44.5	36.7502	25.1754	17.5408	26.025	25.4163	22.9745	26.9674	21.5502	19.9355	39.557	19.8503	15.5886	middle
35	47	ssc-miR-138_R+3	AGCTGGTGTTGTGAATCAGGCCGT	24	GL894339.1	-	3095	3225	gaagctcgccgagttctggtatggttgctgcAGCTGGTGTTGTGAATCAGGCCGAcgagcagcgcatcctcttacccggctatttcacgacaccagggttgcatcatacccatcctctccaggccagcctc	9	ssc-mir-138,bta-mir-138-1,eca-mir-138-2,cfa-mir-138a,hsa-mir-138-1,mmu-mir-138-1,rno-mir-138-1,sha-mir-138-2,oan-mir-138-1,	ssc-mir-138	gcggtggggcAGCTGGTGTTGTGAATCAGGCcgttgccaatcagagaacggctacttcacaacaccagggtcacaccccaccaca	ssc-miR-138	AGCTGGTGTTGTGAATCAGGC	5'	Diff	gp2	((.(((.((((((....(((((((.(((..(..(((((((((((((...(((((..(((.((......)))))...)))))..))))))))))))).)..))))))))))......)))..))).))).))	131	58	-55	2.62501	1.32502	2.06363	1.735	0.409941	0	2.69674	1.79585	1.30014	3.54999	2.17113	2.0333	low
93	85	PC-3p-316951_2	GCTCAAACATGTCAAGAT	18	GL894341.1	+	53558	53698	ggtgctttgtggtccagttagcaccctttttgagatttttttattgtgtgctaaattgttccatttctaaatagaagagGCTCAAACATGTCAAGATtttaggaaaaggtgaaacaactggagaatgaaagctgtattttc	0						3'	New	gp4	...(((((((..(((((((..((((.((..(((((((((..(((..((.(((....(.(((.(((....))).))).)))).))...)))..)))))))))..))..))))....)))))))..)).))))).........	129	35.5	-31.9	3.50002	0	0	0	1.63976	0	0	0	0	0	0.620322	0	low
292	284	PC-3p-37418_35	TTTTAAGCAGGAGGTGTC	18	GL894625.1	-	853	961	gatggtccagacatgtcatctctcttgcctgttaaagaaggtctagagatgatctggccttaggtataacaagggTTTTAAGAAGGAGGTGTCatgtaggaggactttg	0						3'	New	gp4	...(((((..(((((.((((((((((((((((((...((((.(((((.....))))))))).....)))).)))....)))))..)))))).)))))....)))))...	103	44	-37.6	11.3751	9.93766	15.4772	14.7475	16.3976	15.3163	13.8689	2.15502	4.3338	6.59284	4.96258	7.45544	middle
85	109	eca-miR-486-3p	CGGGGCAGCTCAGTACAGGAT	21	GL894726.2	+	3458	3559	cgactcccaccccgacgcgccgggtactgagctggcccgagctgggcacagtgagggcctCGGGGCAGCTCAGTACAGGACccgtcagggaggtcagaggtc	8	eca-mir-486,cfa-mir-486,hsa-mir-486-1,hsa-mir-486-2,ptr-mir-486,ggo-mir-486,mml-mir-486,mmu-mir-486a,	eca-mir-486	ggaTCCTGTACTGAGCTGCCCCGAGgcccttcactgtgcccagctCGGGGCAGCTCAGTACAGGAT	eca-miR-486-3p	CGGGGCAGCTCAGTACAGGAT	3'	Yes	gp2	...(((((.(((.((((..((..(((((((((((.(((((((((....))).......)))))).))))))))))).))...)))).))).))...)))...	96	70.6	-54.7	0	0	0	0	0	0	0	0.718339	0	4.05713	1.86097	0	low
14	19	rno-mir-486-p3	CGGGGCAGCTCAGTACAGGA	20	GL894726.2	+	3481	3540	GTACTGAGCTGGCCCGAGCtgggcacagtgagggcctCGGGGCAGCTCAGTACAGGAccc	1	rno-mir-486,	rno-mir-486	gcaTCCTGTACTGAGCTGCCCCGAGctgagcacaatgaaggacctcggggcagctcagtacaggaccc	rno-mir-486-p3	cggggcagctcagtacagga	3'	New	gp1b	(((((((((((.(((((((((....))).......)))))).))))))))))).......	53	68.3	-35.7	0	0	0	0	0	0	0	0	3.46704	0	1.24064	0	low
119	111	PC-5p-27068_56	CAAGGAGTCTAACACGTG	18	GL895008.1	-	16006	16086	aaagacaagcCAAGGAGTCTAACACATGagggaaagaaaatgacccttacttttgttggaaattcttttgttgttgttgtt	0						5'	New	gp4	...(((((((.(((((((((((((..((((((...........))))))....)))))))..)))))).))..)))))...	75	35.8	-18.9	14.0001	10.6002	9.28632	48.5799	4.09941	19.1454	6.16397	0	1.73352	1.01428	2.48129	2.0333	middle
91	117	ssc-miR-664-3p_R-5	TATTCATTTATCTCCCAGC	19	GL895128.2	-	27507	27581	atcttggtaaatgcgctgggctgaaaggcagaaaacttgtagTATTCATTTTTCTCCCAGCaattccactaacta	3	ssc-mir-664,bta-mir-664b,cfa-mir-664,	ssc-mir-664	gaacattgaaaCAGGCTAGGAGAAGTGATTGGATagaaaatggtattcTATTCATTTATCTCCCAGCCTACAaaaagaaa	ssc-miR-664-3p	TATTCATTTATCTCCCAGCCTACA	3'	Diff	gp2	...(((((.(((..((((((..(((((...(((.((.....)).)))..))))).)))))).)))..)))))...	69	40	-18.2	3.50002	3.97506	3.09544	0	4.09941	0	2.31149	2.15502	5.20056	0.507142	1.86097	4.74437	low
16	23	ssc-miR-30a-5p_R+2	TGTAAACATCCTCGACTGGAAGCT	24	GL895276.2	+	200546	200640	tccctgcgacagtgagcggcTGTAAACATCCTCGACTGGAAGCTgtgaggctgaagacgggCTTTCAGTCGGATGTTTGCAGCcgccgactgcct	14	ssc-mir-30a,bta-mir-30a,cfa-mir-30a,cfa-mir-30d,hsa-mir-30a,mml-mir-30a,cgr-mir-30a,mmu-mir-30a,mmu-mir-30d,rno-mir-30a,mdo-mir-30a,oan-mir-30a,oan-mir-30e,oan-mir-30d,	ssc-mir-30a	tccctgcgacagtgagcggcTGTAAACATCCTCGACTGGAAGctgtgaggctgaagacgggCTTTCAGTCGGATGTTTGCAGCcgccgactgcctcccgcatcagga	ssc-miR-30a-5p	TGTAAACATCCTCGACTGGAAG	5'	Diff	gp2	.........((((..((((((((((((((((..(((((((((((((..........)).)))))))))))))))))))))))))))..))))...	83	58.9	-50.6	2114.01	2583.79	4562.16	3022.37	3546.4	3099.65	5477.07	4940.73	3419.37	8070.65	3555.07	2532.82	high
16	24	ssc-miR-30a-3p	CTTTCAGTCGGATGTTTGCAGC	22	GL895276.2	+	200546	200640	tccctgcgacagtgagcggcTGTAAACATCCTCGACTGGAAGCTgtgaggctgaagacgggCTTTCAGTCGGATGTTTGCAGCcgccgactgcct	14	ssc-mir-30a,bta-mir-30a,cfa-mir-30a,cfa-mir-30d,hsa-mir-30a,mml-mir-30a,cgr-mir-30a,mmu-mir-30a,mmu-mir-30d,rno-mir-30a,mdo-mir-30a,oan-mir-30a,oan-mir-30e,oan-mir-30d,	ssc-mir-30a	tccctgcgacagtgagcggcTGTAAACATCCTCGACTGGAAGctgtgaggctgaagacgggCTTTCAGTCGGATGTTTGCAGCcgccgactgcctcccgcatcagga	ssc-miR-30a-3p	CTTTCAGTCGGATGTTTGCAGC	3'	Yes	gp2	.........((((..((((((((((((((((..(((((((((((((..........)).)))))))))))))))))))))))))))..))))...	83	58.9	-50.6	10.5	13.2502	49.527	25.1575	21.7269	42.12	53.5495	68.6014	38.1375	72.0141	68.8558	16.2664	middle
25	43	ssc-miR-542-5p_R+2	TCGGGGATCATCATGTCACGAGA	23	GL895293.1	+	3331	3440	ggtcaaggatgcacagacctcagacgtcTCGGGGATCATCATGTCACGAGAgaccactgtgcactTGTGACAGATTGATAACTGAAAggtctgggagccgctcatcttca	11	ssc-mir-542,bta-mir-542,eca-mir-542,cfa-mir-542,hsa-mir-542,ppy-mir-542,ggo-mir-542,mml-mir-542,cgr-mir-542,mmu-mir-542,rno-mir-542-2,	ssc-mir-542	cctcagacgtcTCGGGGATCATCATGTCACGAgagaccactgtgcactTGTGACAGATTGATAACTGAAAggtctgggag	ssc-miR-542-5p	TCGGGGATCATCATGTCACGA	5'	Diff	gp1a	.....((((((.......(((((((...((((..((((...(((((((((..((....))...)))))))))...))))..))))...))))))).......))))))..	77	51.8	-36.3	3.50002	9.27515	5.15907	13.88	4.09941	8.93454	28.5084	13.6484	1.73352	19.2714	24.8129	2.71107	middle
25	44	ssc-miR-542-3p	TGTGACAGATTGATAACTGAAA	22	GL895293.1	+	3331	3440	ggtcaaggatgcacagacctcagacgtcTCGGGGATCATCATGTCACGAGAgaccactgtgcactTGTGACAGATTGATAACTGAAAggtctgggagccgctcatcttca	11	ssc-mir-542,bta-mir-542,eca-mir-542,cfa-mir-542,hsa-mir-542,ppy-mir-542,ggo-mir-542,mml-mir-542,cgr-mir-542,mmu-mir-542,rno-mir-542-2,	ssc-mir-542	cctcagacgtcTCGGGGATCATCATGTCACGAgagaccactgtgcactTGTGACAGATTGATAACTGAAAggtctgggag	ssc-miR-542-3p	TGTGACAGATTGATAACTGAAA	3'	Yes	gp1a	.....((((((.......(((((((...((((..((((...(((((((((..((....))...)))))))))...))))..))))...))))))).......))))))..	77	51.8	-36.3	59.5003	34.4505	62.9406	97.1599	37.7146	30.6327	258.116	96.9757	37.2707	193.728	112.899	40.666	middle
84	108	rno-miR-450a-5p_R-1	TTTTGCGATGTGTTCCTAATG	21	GL895293.1	+	4050	4136	agaggcactaaactatTTTTGCGATGTGTTCCTAATAcgtaatctaagtgtattgggaacattttgcattcgtagttttgtgtcaat	3	cgr-mir-450b,mmu-mir-450b,rno-mir-450a,	rno-mir-450a	gagagatgcggagctgtTTTTGCGATGTGTTCCTAATGTgtgctacaattaTATTGGGAACATTTTGCATAAatagttttacatcgacaca	rno-miR-450a-5p	TTTTGCGATGTGTTCCTAATGT	5'	Diff	gp2	...(((((.(((((((...(((((..(((((((((((((.........)))))))))))))..)))))...))))))).)))))...	81	34.5	-37	1.75001	1.32502	1.03181	3.46999	0	1.27636	1.54099	0	0	0	0.620322	0.677767	low
17	30	ssc-miR-450a_R-2	TTTTGCGATGTGTTCCTAAT	20	GL895293.1	+	4173	4278	gtctgtcaaagaaagatgctaaactggTTTTGCGATGTGTTCCTAATatgcagtataaatataTTGGGAGCATTTTGCATGCATggttttgtatcactatacagat	7	ssc-mir-450a,bta-mir-450a-1,eca-mir-450a,cfa-mir-450a,hsa-mir-450a-1,ptr-mir-450a-1,ppy-mir-450a-1,	ssc-mir-450a	gtctgtcaaagaaagatgctaaactggTTTTGCGATGTGTTCCTAATATgcagtataaatatattgggagcattttgcatgcatggttttgtatcactatacagat	ssc-miR-450a	TTTTGCGATGTGTTCCTAATAT	5'	Diff	gp1a	((((((...((...(((((.(((((.....(((((..(((((((((((((.........)))))))))))))..))))).....))))).))))).))..))))))	106	34.9	-34.4	42.0002	37.1006	31.4703	47.7124	24.5964	32.5472	156.025	47.0512	24.2693	146.564	104.214	31.1773	middle
17	31	hsa-miR-450a-1-3p_L-1_2ss8AG20TC	TTGGGAGCATTTTGCATGCAT	21	GL895293.1	+	4173	4278	gtctgtcaaagaaagatgctaaactggTTTTGCGATGTGTTCCTAATatgcagtataaatataTTGGGAGCATTTTGCATGCATggttttgtatcactatacagat	7	ssc-mir-450a,bta-mir-450a-1,eca-mir-450a,cfa-mir-450a,hsa-mir-450a-1,ptr-mir-450a-1,ppy-mir-450a-1,	hsa-mir-450a-1	aaacgatactaaactgtTTTTGCGATGTGTTCCTAATATgcactataaatatATTGGGAACATTTTGCATGTATagttttgtatcaatata	hsa-miR-450a-1-3p	ATTGGGAACATTTTGCATGTAT	3'	Diff	gp1a	((((((...((...(((((.(((((.....(((((..(((((((((((((.........)))))))))))))..))))).....))))).))))).))..))))))	106	34.9	-34.4	0	0	0	0	0	2.55272	0	1.43668	0	3.04285	0.620322	0	low
19	33	ssc-miR-450b-5p_R-1	TTTTGCAATATGTTCCTGAAT	21	GL895293.1	+	4355	4443	tacaaaattatTTTTGCAATATGTTCCTGAATatgtaatataagtaTATTGGGAACATTTTGCATCCAtagttttgtatcgatatttag	7	ssc-mir-450b,bta-mir-450b,eca-mir-450b,cfa-mir-450b,hsa-mir-450b,ptr-mir-450b,mml-mir-450b,	ssc-mir-450b	aaaattatTTTTGCAATATGTTCCTGAATAtgtaatataagtataTTGGGAACATTTTGCATCCATagttttgtatcgat	ssc-miR-450b-5p	TTTTGCAATATGTTCCTGAATA	5'	Diff	gp1a	(((((((((((...(((((.(((((((..(((((.........)))).)..))))))).)))))...)))))))))))...........	78	24.7	-27.9	126.001	188.153	154.772	178.705	131.181	141.676	642.594	228.432	110.079	635.956	370.953	86.0764	middle
450	442	PC-3p-31736_45	TTTCCCCTCGCCCATCCCCAGT	22	GL895499.1	-	15129	15225	ggggtgccttggggaagggggtggggagaagggcacacgcctcaggccggggtctgactctgtgcaccTTTCCCCTCGCCCATCCCCAGAgcacgca	0						3'	New	gp4	...((((..((((((.(((((.(((((((.(((((((....((((((....))))))...))))).))))))))))).))).))))))..))))...	91	69.1	-57	5.25002	2.65004	6.19088	6.93999	5.73917	2.55272	3.08198	2.15502	3.46704	3.04285	8.06419	6.0999	low
464	456	PC-3p-101671_8	AAATTTGAAATCTGGCTCT	19	GL895773.1	-	13219	13295	nntacatgtggtcagtttacttaatcgctgatgcagttttcttcattagAGATTTGAAATCTGGCTCTttttgtttt	0						3'	New	gp4	...(((...(((((((((....((((.((((((.((....)).)))))).))))..))).)))))).....)))...	71	32.5	-17.2	0	0	1.03181	31.23	0	0	0	0	0	1.01428	0	0	middle
27	46	hsa-miR-1307-5p	TCGACCGGACCTCGACCGGCT	21	GL895853.2	-	46341	46469	tcaagagccagccaagtcactgtcactgcctaccaatcTCGACCGGACCTCGACCGGCTcgtctatgttgccaatcgACTCGGCGTGGCGTCGGTCGTGGtagataggcggtcatacagacgaattttc	5	ssc-mir-1307,eca-mir-1307,cfa-mir-1307,hsa-mir-1307,ptr-mir-1307,	hsa-mir-1307	catcaagacccagctgagtcactgtcactgcctaccaatcTCGACCGGACCTCGACCGGCTcgtctgtgttgccaatcgACTCGGCGTGGCGTCGGTCGTGgtagataggcggtcatgcatacgaattttcagctcttgttctggtgac	hsa-miR-1307-5p	TCGACCGGACCTCGACCGGCT	5'	Yes	gp1a	...............(((..(((.((((((((...(((.(((((((.((.((.(((..(((..............)))..))))).))..))))))).)))...)))))))).)))..)))........	106	56.6	-42.7	6660.53	7218.71	22323.3	13845.3	11747.3	12998.5	21960.7	23660.6	21371.7	27147.3	18967.6	10060.1	high
27	47	ssc-miR-1307_R+1	ACTCGGCGTGGCGTCGGTCGTGT	23	GL895853.2	-	46341	46469	tcaagagccagccaagtcactgtcactgcctaccaatcTCGACCGGACCTCGACCGGCTcgtctatgttgccaatcgACTCGGCGTGGCGTCGGTCGTGGtagataggcggtcatacagacgaattttc	5	ssc-mir-1307,eca-mir-1307,cfa-mir-1307,hsa-mir-1307,ptr-mir-1307,	ssc-mir-1307	ctaccaatctcgaccggacctcgaccggctcgtctatgttgccaatcgACTCGGCGTGGCGTCGGTCGTGgtagataggc	ssc-miR-1307	ACTCGGCGTGGCGTCGGTCGTG	3'	Diff	gp1a	...............(((..(((.((((((((...(((.(((((((.((.((.(((..(((..............)))..))))).))..))))))).)))...)))))))).)))..)))........	106	56.6	-42.7	378.002	343.18	1447.63	674.914	319.754	851.334	842.923	1747	1597.44	1347.98	1218.31	317.873	middle
198	190	PC-5p-3776_849	TGTCTAGAAAGTCTGTTGT	19	GL895891.2	-	160453	160558	aatttgtTGTCTAGAAAGTCTGTTGTtgtaaacatccccgactggaagctgtaagacatagctaagctttcagtcagatttttgctgccaccgactcttcacaggc	0						5'	New	gp4	........((((.(((((((.((.(..(((((.(((...(((((((((((..............))))))))))).))).)))))..).)).)))).)))..))))	98	43.4	-30.9	43.7502	38.4256	44.368	36.4349	63.5408	84.8781	70.8856	34.4803	29.4698	90.7783	118.792	42.0216	middle
6	10	ssc-miR-26a	TTCAAGTAATCCAGGATAGGCT	22	GL895994.1	+	40640	40723	ggctgtggctggaTTCAAGTAATCCAGGATAGGCTgtttccatctgtgaggCCTATTCTTGATTACTTGTTTCtggaggcagct	7	ssc-mir-26a,oar-mir-26a,cfa-mir-26a-2,ptr-mir-26a-2,cgr-mir-26a,mmu-mir-26a-2,mdo-mir-26-1,	ssc-mir-26a	ggctgtggctggaTTCAAGTAATCCAGGATAGGCTgtttccatctgtgaggcctattcttgattacttgtttctggaggcagct	ssc-miR-26a	TTCAAGTAATCCAGGATAGGCT	5'	Yes	gp1a	((((((..(..((..(((((((((.((((((((((..............)))))))))).)))))))))..))..)..))))))	84	47.6	-42.2	225401	243866	282523	225123	276375	202196	364375	356945	383487	469264	312820	351288	high
6	11	mmu-miR-26a-2-3p_1ss4GA	CCTATTCTTGATTACTTGTTTC	22	GL895994.1	+	40640	40723	ggctgtggctggaTTCAAGTAATCCAGGATAGGCTgtttccatctgtgaggCCTATTCTTGATTACTTGTTTCtggaggcagct	7	ssc-mir-26a,oar-mir-26a,cfa-mir-26a-2,ptr-mir-26a-2,cgr-mir-26a,mmu-mir-26a-2,mdo-mir-26-1,	mmu-mir-26a-2	ggctgcggctggaTTCAAGTAATCCAGGATAGGCTgtgtccgtccatgaggCCTGTTCTTGATTACTTGTTTCtggaggcagcg	mmu-miR-26a-2-3p	CCTGTTCTTGATTACTTGTTTC	3'	Diff	gp1a	((((((..(..((..(((((((((.((((((((((..............)))))))))).)))))))))..))..)..))))))	84	47.6	-42.2	145.251	182.853	137.231	112.775	175.455	99.5563	166.427	161.626	255.694	131.857	142.674	256.874	middle
30	51	ssc-miR-4338_L-1R-1	TGTTCAGTCTCAGTGGGAAC	20	GL896017.1	-	115019	115096	atctctcgagaTGTTCAGTCTCAGTGGGAACcgtgtgtaagtcttgTTCCCATTGAGACTGAGCATCTcaagggatca	1	ssc-mir-4338,	ssc-mir-4338	atctctcgagATGTTCAGTCTCAGTGGGAACCgtgtgtaagtcttgttcccattgagactgagcatctcaagggatca	ssc-miR-4338	ATGTTCAGTCTCAGTGGGAACC	5'	Diff	gp1a	((((((.((((((((((((((((((((((((..............)))))))))))))))))))))))).))))))..	76	47.4	-48.8	8.75004	13.2502	3.09544	1.735	11.4783	8.93454	0.770496	0	5.20056	2.02857	0	10.1665	middle
30	52	ssc-mir-4338-p3_1ss11GA	TTCCCATTGAAACTGAGCATCT	22	GL896017.1	-	115019	115096	atctctcgagaTGTTCAGTCTCAGTGGGAACcgtgtgtaagtcttgTTCCCATTGAGACTGAGCATCTcaagggatca	1	ssc-mir-4338,	ssc-mir-4338	atctctcgagATGTTCAGTCTCAGTGGGAACCgtgtgtaagtcttgttcccattgagactgagcatctcaagggatca	ssc-mir-4338-p3	ttcccattgagactgagcatct	3'	New	gp1a	((((((.((((((((((((((((((((((((..............)))))))))))))))))))))))).))))))..	76	47.4	-48.8	336.002	540.609	139.295	133.595	430.438	404.607	41.6068	48.1287	187.22	38.5428	36.599	168.086	middle
225	217	PC-5p-130872_5	ACCATGATGCTGAGCACT	18	GL896183.1	+	86732	86814	gACCATGATGCTGAGCACAgaaggcagggaggggttcgtggtgaaggtcaggggcctaccctggtcgtgctcagctgatgaag	0						5'	New	gp4	...(((...(((((((((.((...(((((..(((..(.(((......))).)..))).))))).)))))))))))..)))...	77	60.2	-37.7	0	3.97506	0	0	0	2.55272	0	0	0	0	0.620322	0	low
459	451	PC-3p-169308_4	TGGGCGCGTTCAGCTTCTGAGGC	23	GL896243.1	-	7455	7521	cctgctttaggagctggcgcgtccccggtgcttcaccaagcTGGGCGCGTTCAGCTTCTGAGGCtga	0						3'	New	gp4	...(((((((((((((((((((((..((((...)))).....))))))).))))))))))))))...	61	64.2	-38.1	0	0	0	0	0	0	0	0.718339	0.86676	5.07142	0	0	low
353	345	PC-3p-68617_14	TTCTCAGGTTTGACAGTCCTGGA	23	GL896264.1	+	37157	37247	aaaggacggcacctctcgggctgacacacctgagattgtccctggacgctcaccaTTCTCAGGTTTGACAGTCCTGGAggcactgcccagg	0						3'	New	gp4	...((.(((..((((..((((((.((.((((((((.((((....))))........)))))))).)).))))))..))))..))).))...	85	59.3	-39.5	7.00003	3.97506	4.12725	5.20499	2.45964	3.82909	2.31149	2.15502	5.20056	2.02857	2.48129	1.35553	low
263	255	PC-3p-82536_11	CACAGGCCTGTCTGGGCATGCT	22	GL896266.1	+	1482	1570	accagcatgcccggaggggcctggagctggttgttggctgcCACAGGCCTGTCTGGGCATGCTgcctggcccgccactgtggcaagacc	0						3'	New	gp4	..(((((((((((((..((((((..((.(((.....)))))..))))))..)))))))))))))........(((.....)))......	62	68.5	-50	1.75001	0	3.09544	1.735	0.819882	1.27636	4.62298	0	1.73352	0	3.72193	0	low
134	126	PC-3p-443208_2	AGCGTTGGTGCTCCCGGAC	19	GL896296.2	-	8882	8969	nctggcagactggatccaggactggccttgacgcctctgtgctctcctgcagggtAGCGTTGGTGCTCCCGGACccaaaggtgctcnn	0						3'	New	gp4	...((((...(((.(((.(((...(((..(((((..(..(((......)))..)..))))))))..))).))).)))....))))...	82	61.4	-29.6	0	0	0	3.46999	0	0	0	0	0	0	0	0	low
117	143	ssc-mir-6782-p5	GTGGGGGAAGGCAGGGGTGC	20	GL896432.1	+	12999	13094	tctGTGGGGGAAGGAAGGGGTGCttggaccgcaggggagttcagatggggcctcccatgctgtcctgggccaggctctcttccacccacccaccca	1	ssc-mir-6782,	ssc-mir-6782	cctgcgggtggtgtgggggaaggcaggggtgcggcctccagccTGACCTCTGGTCTCCCGCCCTGctgccttcgg	ssc-mir-6782-p5	gtgggggaaggcaggggtgc	5'	New	gp2	...(((((((..((((((((.((((((.((.((((..(((....(((((....))))))))..))))))))))))))))))))..)).)))))...	90	65.6	-52.6	0	2.65004	0	0	0	3.82909	0	0	0	0	0	0	low
453	445	PC-5p-119932_6	AGGGACCGAACCCGCAACCT	20	GL896452.1	-	21306	21409	nnncAGGGACCGAACCCGCAACCTcaaaaatattttctatttacttgtcacatgggttatttaggaccatgttatttagtttgcatctgtgtgaggatttctgc	0						5'	New	gp4	...(((..(((..((.(((((.((.((.(((((.(((((...(((..(...)..)))....)))))..))))).)).)).))))....).))..)).)..))).	100	38.5	-17.6	7.00003	2.65004	7.22269	0	3.27953	2.55272	3.08198	1.43668	2.60028	1.01428	1.86097	0	low
364	356	PC-5p-148093_4	GCTCTGAGCGCCCCTCCTCGTCT	23	GL896485.1	+	3821	3910	cccgtgcctgtgctccgGCTCTGAGCGCCCCTCCTCGTCCgtcccctccagctggagaggagccgcgacagagccggagcagggcacccg	0						5'	New	gp4	...((((((.(((((((((((((..(((..((((((.(((((........)).)))))))))..))).)))))))))))))))))))...	84	74.4	-57	0	0	3.09544	0	0	1.27636	0	0	0	2.02857	0.620322	0	low
31	53	ssc-mir-4339-p3_1ss22GT	AGAGGAGCCGCGACAGAGCCGT	22	GL896485.1	+	3828	3902	ctgtgctccggctctgagcgcccctcctcgtccgtcccctccagctggAGAGGAGCCGCGACAGAGCCGGagcag	1	ssc-mir-4339,	ssc-mir-4339	ctgtgctccgGCTCTGAGCTGCCCCTCCTCGTCCgtcccctccagctggagaggagccgcgacagagccggagcagtggc	ssc-mir-4339-p3	agaggagccgcgacagagccgg	3'	New	gp1a	...(((((((((((((..(((..((((((.(((((........)).)))))))))..))).))))))))))))).	71	72	-46.3	12.2501	5.30008	17.5408	13.88	5.73917	11.4873	13.0984	21.5502	21.669	17.2428	27.9145	23.0441	middle
396	388	PC-5p-212119_3	CATGGAGTCCCTCTGAGTAGCAG	23	GL896509.1	-	60433	60521	tcatggaaagagggcCATGGAGTCCCTCTGAGTAGCAGcagcctctccctctgtctgcctcagtggagcttcaagacctttccccagcc	0						5'	New	gp4	...(((..(((((....(((((..((.(((((..(((((((.........))).))))))))).))..)))))...)))))..)))...	83	58.4	-33.3	5.25002	0	1.03181	0	0.819882	2.55272	0	0	0.86676	0	0	0	low
435	427	PC-3p-369914_2	AAGAGTTTTATTGAGGTAT	19	JH118411.1	-	40597	40699	gtgtacaagtgctgatcagaaggaaaaattaattgtactgtaggatagaaatgattttttaAAGAGTTTTATTGAAGTATagttgatttacaagcttgtgann	0						3'	New	gp4	...(((((((..((.((.....)).((((((((((((((....(((((((....(((...)))...)))))))..)))))))))))))).)).)))))))...	97	28.2	-19.3	3.50002	0	0	0	0	0	0	0	0	0	0	0	low
359	351	PC-3p-153899_4	AATTTATGGGAGTTCCTGCTGT	22	JH118447.1	-	4131	4239	nnnctactgcaccacaagggaattccaaagcttttcagatttcaaaactgtgggaaaccttgggtctcaagaacAAGTTATGGGAGTTCCTGCTGTggtgcaacagggn	0						3'	New	gp4	...((..(((((((((.(((((((((..((((((((((((.......((..((....))..))))))...))).)))))...)))))))))..)))))))))..))...	103	45	-40	0	0	2.06363	3.46999	0	0	0	0	0	0	0	0	low
75	97	ssc-miR-326_R-1	CCTCTGGGCCCTTCCTCCA	19	JH118500.1	-	65470	65570	cgcgaggacgggtcgcctggaggatgccgagcgacagtgaagcatgggcctcctcactgggccacctgccgctggtgaacCCTCTGGGCCCCTCCTCCAcc	10	ssc-mir-326,bta-mir-326,eca-mir-326,cfa-mir-326,hsa-mir-326,ptr-mir-326,ggo-mir-326,cgr-mir-326,mmu-mir-326,rno-mir-326,	ssc-mir-326	tctgtctgttgggctggaggcagggcctttgtgcaggcgggttgtgctcagatcgCCTCTGGGCCCTTCCTCCAGcccagaggcggattca	ssc-miR-326	CCTCTGGGCCCTTCCTCCAG	3'	Diff	gp2	...(((((.(((..(((..((((..(((.((((.(((.........(((((.......)))))..))).)))))))....))))..)))))))))))....	94	70.3	-45.9	7.87504	3.31255	9.28632	12.145	5.32923	6.38181	9.24595	10.0567	7.80084	8.62141	5.27274	9.82762	middle
155	147	PC-5p-176483_4	TAGACAGCAGGACGGTGG	18	JH118525.1	-	386395	386453	ggatGAGACAGCAGGACGGTGGgcggacatctctgcccagcccccgccccgcctcactc	0						5'	New	gp4	(..((((...((.((.(((((((((((....))))))))....))).)).))))))..)	59	71.2	-24.4	0	0	0	3.46999	0	0	1.54099	0	0	1.01428	0.620322	0.677767	low
304	296	PC-3p-70493_14	GGCGGGCGGGGCCGGGGGT	19	JH118531.1	-	102286	102383	gaagtttcctgtctttgctgctgctgacgtgtgcctggtccagttagtaaacatttaaacttGGCGGGCGGGGGCGGGGGTgccaggcaggggattga	0						3'	New	gp4	..(((..(((((((..((..(((((..((..((((..((....((((.......))))))..))))..))..)))))..))...)))))))..)))..	94	57.1	-36	0	0	1.03181	1.735	0	11.4873	2.31149	0.718339	4.3338	2.02857	2.48129	0	middle
302	294	PC-3p-232243_3	TCTTGGATTTACTGAAGAC	19	JH118531.1	+	122734	122835	tcagtcttcaaaatccaggggaaacttttgtcttaggatcaaaggcgtttgctctcaatcactcctcacttatggtagccTCGTGGATTTACTGAAGACcca	0						3'	New	gp4	...((((((((((((((((((..(((...((...((((....((((....)).)).......)))).))....)))..)))).)))))))..)))))))...	96	44.1	-27.7	0	0	0	5.20499	0	0	0	0	0	0	0	0	low
222	214	PC-3p-366386_2	TGAAGTATGAATAAAGACAACT	22	JH118572.1	+	28387	28477	tgattttaacaggtgttgtctttattcatacttcgtattgtcactgtcacagtaTGAAGTATGAATAAAGACAACTcttttgttaaaaagc	0						3'	New	gp4	...((((((((((.(((((((((((((((((((((((((((.......))))))))))))))))))))))))))).))..))))))))...	85	30.8	-44.2	0	0.66251	1.03181	0	0	3.82909	0	0.718339	0	0	0	1.35553	low
12	17	eca-miR-449a	TGGCAGTGTATTGTTAGCTGGT	22	JH118654.1	-	238131	238219	ctgtgtgtgatgggtTGGCAGTGTATTGTTAGCTGGTtgagtatatgagtagcatcagctaacatgcaactgctgtcttattgcatata	2	eca-mir-449a,ppy-mir-449a,	eca-mir-449a	TGGCAGTGTATTGTTAGCTGGTtgaatatatgaatggcatcagctaacaagcaactgcta	eca-miR-449a	TGGCAGTGTATTGTTAGCTGGT	5'	Yes	gp1b	.((((((..((..(..(((((((((.(((((((((((.(..(((....))).)))))))))))))))).)))))..)..))..))))))	88	41.6	-36.7	1809.51	2171.71	456.061	494.474	1341.33	1097.67	363.674	1469	806.087	266.756	1169.93	559.836	middle
1	1	ssc-miR-15a	TAGCAGCACATAATGGTTTGT	21	JH118724.1	+	70411	70505	accttggagtaaagTAGCAGCACATAATGGTTTGTggattttgaaaaggtgCAGGCCATATTGTGCTGCCTCAaaaatacaaggatctgatcttc	9	ssc-mir-15a,bta-mir-15a,eca-mir-15a,cfa-mir-15a,cgr-mir-15a,mmu-mir-15a,rno-mir-15a,mdo-mir-15a,oan-mir-15a,	ssc-mir-15a	ttggagtaaagTAGCAGCACATAATGGTTTGTggattttgaaaaggtgcaggccatattgtgctgcctcaaaaatacaa	ssc-miR-15a	TAGCAGCACATAATGGTTTGT	5'	Yes	gp1a	.(((((..........((((((((..((((..(((...............)))..))))..))))))))..........)))))...........	53	41.1	-29.4	43013.4	40120.3	27927.1	40527.8	41669.7	49784.5	24030.2	21131.4	22736	13906.8	27315.9	35275.1	high
1	2	cgr-miR-15a-3p_1ss22AT	CAGGCCATATTGTGCTGCCTCT	22	JH118724.1	+	70411	70505	accttggagtaaagTAGCAGCACATAATGGTTTGTggattttgaaaaggtgCAGGCCATATTGTGCTGCCTCAaaaatacaaggatctgatcttc	9	ssc-mir-15a,bta-mir-15a,eca-mir-15a,cfa-mir-15a,cgr-mir-15a,mmu-mir-15a,rno-mir-15a,mdo-mir-15a,oan-mir-15a,	cgr-mir-15a	ggagtaaagTAGCAGCACATAATGGTTTGTGGAttttgaaaaggtgCAGGCCATATTGTGCTGCCTCAaaatacaagg	cgr-miR-15a-3p	CAGGCCATATTGTGCTGCCTCA	3'	Diff	gp1a	.(((((..........((((((((..((((..(((...............)))..))))..))))))))..........)))))...........	53	41.1	-29.4	36.7502	27.8254	41.2725	38.1699	32.7953	39.5672	25.4264	30.8886	26.8696	27.3856	45.2835	44.7326	middle
6	8	ssc-miR-16_R+2	TAGCAGCACGTAAATATTGGCGTA	24	JH118724.1	+	70549	70643	aatgtcagcagtgcctTAGCAGCACGTAAATATTGGCGTTaagattctaaaattatctccagtattaactgtgctgctgaagtaaggttggccat	16	ssc-mir-16-1,bta-mir-16b,oar-mir-16b,eca-mir-16-1,cfa-mir-16-2,hsa-mir-16-2,ptr-mir-16-2,ppy-mir-16-2,mml-mir-16-2,mmu-mir-16-2,rno-mir-16,mdo-mir-16-2,oan-mir-16b,oan-mir-16c,oan-mir-15b,oan-mir-15c,	ssc-mir-16-1	tccgctcTAGCAGCACGTAAATATTGGCGtagtaaaataaatattaaacaccaatattattgtgctgctttagcgtg	ssc-miR-16	TAGCAGCACGTAAATATTGGCG	5'	Diff	gp2	...((((((..(((.((((((((((((.((((((((.....((((.........)))))))))))).)).)))))))))).)))..))))))...	89	40	-37.6	313.251	214.653	188.822	227.285	250.064	306.327	206.493	163.063	245.293	168.371	181.134	298.895	middle
2	3	ssc-miR-16	TAGCAGCACGTAAATATTGGCG	22	JH118724.1	+	70550	70641	atgtcagcagtgcctTAGCAGCACGTAAATATTGGCGttaagattctaaaattatctCCAGTATTAACTGTGCTGCTGAAgtaaggttggcc	10	ssc-mir-16-2,bta-mir-16a,eca-mir-16-2,cfa-mir-16-1,hsa-mir-16-1,lla-mir-16,lca-mir-16,cgr-mir-16,mmu-mir-16-1,mdo-mir-16-1,	ssc-mir-16-2	cagtgcctTAGCAGCACGTAAATATTGGCGttaagattctaaaattatctccagtattaactgtgctgctgaagtaagg	ssc-miR-16	TAGCAGCACGTAAATATTGGCG	5'	Yes	gp1a	..((((((..(((.((((((((((((.((((((((.....((((.........)))))))))))).)).)))))))))).)))..)))))).	89	41.3	-37.6	461498	402213	347949	376444	382481	467352	349062	326920	412902	347326	379215	409937	high
2	4	hsa-miR-16-1-3p_R+1	CCAGTATTAACTGTGCTGCTGAA	23	JH118724.1	+	70550	70641	atgtcagcagtgcctTAGCAGCACGTAAATATTGGCGttaagattctaaaattatctCCAGTATTAACTGTGCTGCTGAAgtaaggttggcc	10	ssc-mir-16-2,bta-mir-16a,eca-mir-16-2,cfa-mir-16-1,hsa-mir-16-1,lla-mir-16,lca-mir-16,cgr-mir-16,mmu-mir-16-1,mdo-mir-16-1,	hsa-mir-16-1	gtcagcagtgcctTAGCAGCACGTAAATATTGGCGttaagattctaaaattatctCCAGTATTAACTGTGCTGCTGAagtaaggttgac	hsa-miR-16-1-3p	CCAGTATTAACTGTGCTGCTGA	3'	Diff	gp1a	..((((((..(((.((((((((((((.((((((((.....((((.........)))))))))))).)).)))))))))).)))..)))))).	89	41.3	-37.6	56.0003	53.0008	38.1771	50.3149	45.0935	38.2909	26.9674	26.5785	31.2034	27.3856	49.0054	82.6876	middle
5	7	bta-miR-155	TTAATGCTAATCGTGATAGGGGT	23	JH118804.1	-	133193	133255	tgTTAATGCTAATTGTGATAGGGGTttttacctccgtctgaCTCCTACATGTTAGCATTAACA	2	bta-mir-155,cfa-mir-155,	bta-mir-155	tgTTAATGCTAATCGTGATAGGGGTttttacctcggactgactcctacatgttagcattaaca	bta-miR-155	TTAATGCTAATCGTGATAGGGGT	5'	Yes	gp1b	.((((((((((((...(.((((((((...((....))..)))))))))..)))))))))))).	61	38.1	-23.7	1.75001	15.9003	1.03181	1.735	0.819882	3.82909	6.93447	5.74671	6.93408	7.09998	3.10161	4.0666	middle
5	8	bta-mir-155-p3	CTCCTACATGTTAGCATTAACA	22	JH118804.1	-	133193	133255	tgTTAATGCTAATTGTGATAGGGGTttttacctccgtctgaCTCCTACATGTTAGCATTAACA	2	bta-mir-155,cfa-mir-155,	bta-mir-155	tgTTAATGCTAATCGTGATAGGGGTttttacctcggactgactcctacatgttagcattaaca	bta-mir-155-p3	ctcctacatgttagcattaaca	3'	New	gp1b	.((((((((((((...(.((((((((...((....))..)))))))))..)))))))))))).	61	38.1	-23.7	3.50002	1.32502	2.06363	3.46999	2.45964	15.3163	4.62298	19.3951	7.80084	0	15.5081	16.2664	middle
447	439	PC-5p-47279_25	TCGCAGTGATGATGGATT	18	JH118905.1	-	196635	196706	gtggagaatgtTGGCAGTGATGATGGATTtcatagttatgaatgttggtgtgattacggtcaatatgtcaga	0						5'	New	gp4	...((..((((((((.(((((.((.((((((((....))))).)))...)).))))).)))))))).))...	66	38.9	-16.1	1.75001	1.32502	1.03181	0	0	11.4873	3.08198	0.718339	3.46704	3.04285	2.48129	0.677767	middle
288	280	PC-3p-6715_370	TCATTCTCCTTCTTTGACCAGT	22	JH118928.1	-	123780	123841	gTGGGTCAGAGAGGAAGGATGTGAtttgagcagatggttcTCATTCTCCTTCTTTGACCAGA	0						3'	New	gp4	...(((((((((((.((((((.((..............)).)))))).)))))))))))...	56	46.8	-24.7	36.7502	46.3757	25.7953	27.76	34.435	28.08	27.7379	34.4803	27.7363	27.3856	33.4974	35.9217	middle
427	419	PC-3p-72758_13	CCTGCCCTTTGTACACACC	19	X	-	4992005	4992128	tgagaaaggaccctgaggtttataaggaagatgatgcaatgtggacagacggcaagtcaacctatgtgggcaCCTGCCCTTTGTAAACACCtgtcacctgtgtatgagcttttcctctttcttc	0						3'	New	gp4	.((((((((.....((((((((((....((.((((....(((..(((((.((((.((...((.....))..)).)))).)))))..)))...)))).))...))))))))))...)))))))).	122	46.8	-36.3	0	5.30008	0	8.67499	0	2.55272	6.16397	1.43668	1.73352	0	0.620322	1.35553	low
340	332	PC-5p-75867_12	GATAGGTGGGAGGCTTTG	18	X	-	21436390	21436449	acaagaaGATAGGTGAGAGGCTTTGagggctctgctgagagctattacctgtgatctatc	0						5'	New	gp4	...(((..((((((((..((((((.((.......)).)))))).))))))))..)))...	54	46.7	-20.2	0	0	0	26.025	0	0	1.54099	0	0	0	0	0	middle
53	46	PC-5p-41918_30	TGGAGGCATGTAGTTCCTAAGT	22	X	-	21570243	21570308	ttgggTGGAGGCATGTAGTTCCTAAGTttataattggtaattTAGAAACTAAATGCCTCCATGGAa	0						5'	New	gp4	....((((((((((.(((((.(((((((..........))))))).))))).))))))))))....	58	36.4	-26.7	7.00003	5.30008	5.15907	1.735	1.63976	2.55272	9.24595	6.46505	5.20056	4.05713	10.5455	3.38884	middle
53	47	PC-3p-103921_7	TAGAAACTAAATGCCTCCATGGA	23	X	-	21570243	21570308	ttgggTGGAGGCATGTAGTTCCTAAGTttataattggtaattTAGAAACTAAATGCCTCCATGGAa	0						3'	New	gp4	....((((((((((.(((((.(((((((..........))))))).))))).))))))))))....	58	36.4	-26.7	3.50002	0	3.09544	5.20499	6.96899	2.55272	2.31149	6.82422	0	4.05713	2.48129	3.38884	low
11	20	ssc-miR-221-5p_R-3	ACCTGGCATACAATGTAGATTTC	23	X	-	45274858	45274958	catccaggtctgggcatgaACCTGGCATACAATGTAGATTTCtgtgtttgttgggcaacAGCTACATTGTCTGCTGGGTTTcaggctacctggaagcatgt	11	ssc-mir-221,bta-mir-221,eca-mir-221,cfa-mir-221,hsa-mir-221,ptr-mir-221,cgr-mir-221,mmu-mir-221,rno-mir-221,mdo-mir-221,oan-mir-221,	ssc-mir-221	tgaACCTGGCATACAATGTAGATTTCTGTgtttgttgggcaacAGCTACATTGTCTGCTGGGTTTcaggc	ssc-miR-221-5p	ACCTGGCATACAATGTAGATTTCTGT	5'	Diff	gp1a	..(((((((...(((.((((((..(((.(((((((((....((((((.......)).))))))))))))).)))..)))).)).)))))))))).......	92	48.5	-43.3	92.7504	109.977	52.6225	55.5199	78.7086	111.044	106.328	129.301	112.679	121.714	148.877	120.643	middle
11	21	ssc-miR-221-3p	AGCTACATTGTCTGCTGGGTTT	22	X	-	45274858	45274958	catccaggtctgggcatgaACCTGGCATACAATGTAGATTTCtgtgtttgttgggcaacAGCTACATTGTCTGCTGGGTTTcaggctacctggaagcatgt	11	ssc-mir-221,bta-mir-221,eca-mir-221,cfa-mir-221,hsa-mir-221,ptr-mir-221,cgr-mir-221,mmu-mir-221,rno-mir-221,mdo-mir-221,oan-mir-221,	ssc-mir-221	tgaACCTGGCATACAATGTAGATTTCTGTgtttgttgggcaacAGCTACATTGTCTGCTGGGTTTcaggc	ssc-miR-221-3p	AGCTACATTGTCTGCTGGGTTT	3'	Yes	gp1a	..(((((((...(((.((((((..(((.(((((((((....((((((.......)).))))))))))))).)))..)))).)).)))))))))).......	92	48.5	-43.3	17529.8	22812.9	15210	15054.6	17374.9	17890.8	18507.3	27694.1	19177.9	17998.5	23173.4	17796.1	high
12	22	hsa-miR-222-5p_R-1	CTCAGTAGCCAGTGTAGATCC	21	X	-	45275598	45275711	agctgctggaatgtgtaggtgccctcaatggCTCAGTAGCCAGTGTAGATCCtgtcatttgtaatcagtAGCTACATCTGGCTACTGGGTCTctgatggcaccttctaccttct	11	ssc-mir-222,bta-mir-222,eca-mir-222,cfa-mir-222,hsa-mir-222,ptr-mir-222,mml-mir-222,age-mir-222,cgr-mir-222,mmu-mir-222,oan-mir-222a,	hsa-mir-222	gctgctggaaggtgtaggtaccctcaatggCTCAGTAGCCAGTGTAGATCCTgtctttcgtaatcagcAGCTACATCTGGCTACTGGGTctctgatggcatcttctagct	hsa-miR-222-5p	CTCAGTAGCCAGTGTAGATCCT	5'	Diff	gp1a	.......((((.(((.(((((((.(((..(((((((((((((((((((...(((...........)))...))))).))))))))))))))..))).)))))))..))).))))	107	49.1	-55.4	1.75001	30.4755	5.15907	12.145	13.1181	22.9745	17.7214	50.2837	19.0687	21.2999	36.599	17.6219	middle
12	23	ssc-miR-222_R-1	AGCTACATCTGGCTACTGGGTCT	23	X	-	45275598	45275711	agctgctggaatgtgtaggtgccctcaatggCTCAGTAGCCAGTGTAGATCCtgtcatttgtaatcagtAGCTACATCTGGCTACTGGGTCTctgatggcaccttctaccttct	11	ssc-mir-222,bta-mir-222,eca-mir-222,cfa-mir-222,hsa-mir-222,ptr-mir-222,mml-mir-222,age-mir-222,cgr-mir-222,mmu-mir-222,oan-mir-222a,	ssc-mir-222	tgccctcaatggctcagtagccagtgtagatcctgtcatttgtaatcagtAGCTACATCTGGCTACTGGGTCTCtgatgg	ssc-miR-222	AGCTACATCTGGCTACTGGGTCTC	3'	Diff	gp1a	.......((((.(((.(((((((.(((..(((((((((((((((((((...(((...........)))...))))).))))))))))))))..))).)))))))..))).))))	107	49.1	-55.4	4613.02	5635.31	3272.91	3013.69	4926.67	5322.43	4453.47	7327.77	5123.42	4312.73	5753.49	4896.19	middle
89	81	PC-5p-70068_14	CACTCGCTGTCTCTCTCCTGCC	22	X	+	45929592	45929662	ccggctcCACTCGCTGTCTCTCTCCTGCCtgcgggaaatccattggcaggggcagcagcagagagagcaga	0						5'	New	gp4	...((((..((((((((....((((((((...(((...)))...))))))))..))))).))).))))...	65	63.4	-34.3	1.75001	2.65004	1.03181	0	0.819882	1.27636	3.08198	2.87336	0.86676	4.05713	2.48129	0.677767	low
306	298	PC-5p-157254_4	AAAATCTATTTTTCAGGATTT	21	X	-	48079279	48079351	aaagctttAAAATCTATTTTTCAGGACTTagggggcaccacagctgggcctgtaaagatggggagcaagcagg	0						5'	New	gp4	...((((.....(((((((((((((.(..((((....))....))..))))).)))))))))....))))...	67	47.9	-20.8	0	3.97506	0	0	0.819882	0	0.770496	0	0	0	0	0.677767	low
24	41	ssc-miR-532-5p	CATGCCTTGAGTGTAGGACCGT	22	X	+	48632024	48632114	cttgctttctctcttaCATGCCTTGAGTGTAGGACCGTtggcatctgaatacCCTCCCACACCCAAGGCTTGCAggagggccagccttctc	8	ssc-mir-532,bta-mir-532,eca-mir-532,cfa-mir-532,ptr-mir-532,mml-mir-532,mmu-mir-532,rno-mir-532,	ssc-mir-532	ttgctttctctcttaCATGCCTTGAGTGTAGGACCGTtggcatctgaatacCCTCCCACACCCAAGGCTTGCAggagggc	ssc-miR-532-5p	CATGCCTTGAGTGTAGGACCGT	5'	Yes	gp1a	...(((..(((((((.((.((((((.((((.(((..((............))..))).)))).)))))).)).)))))))..)))......	82	54.9	-32.1	6870.53	6989.49	5191.05	5375.02	6178.63	6634.53	8605.67	7656.77	4407.48	7713.62	7593.98	3650.45	high
24	42	ssc-miR-532-3p	CCTCCCACACCCAAGGCTTGCA	22	X	+	48632024	48632114	cttgctttctctcttaCATGCCTTGAGTGTAGGACCGTtggcatctgaatacCCTCCCACACCCAAGGCTTGCAggagggccagccttctc	8	ssc-mir-532,bta-mir-532,eca-mir-532,cfa-mir-532,ptr-mir-532,mml-mir-532,mmu-mir-532,rno-mir-532,	ssc-mir-532	ttgctttctctcttaCATGCCTTGAGTGTAGGACCGTtggcatctgaatacCCTCCCACACCCAAGGCTTGCAggagggc	ssc-miR-532-3p	CCTCCCACACCCAAGGCTTGCA	3'	Yes	gp1a	...(((..(((((((.((.((((((.((((.(((..((............))..))).)))).)))))).)).)))))))..)))......	82	54.9	-32.1	197.751	200.078	179.535	235.96	187.753	282.076	230.378	220.53	138.682	209.957	322.567	278.562	middle
6	9	bta-miR-188	CATCCCTTGCATGGTGGAGGGT	22	X	+	48632378	48632485	ccctgctccctctctcaCATCCCTTGCATGGTGGAGGGTgagctttctgaaaacccCTCCCACGTGCAGGGTTTGCAggatggtgagcctcggcgtcctttgctctct	10	bta-mir-188,eca-mir-188,cfa-mir-188,hsa-mir-188,ptr-mir-188,ggo-mir-188,mml-mir-188,cgr-mir-188,mmu-mir-188,rno-mir-188,	bta-mir-188	tgctccctctctcaCATCCCTTGCATGGTGGAGGGTgagctttctgaaaacccctcccacatgcagggtttgcaggatggtgagcc	bta-miR-188	CATCCCTTGCATGGTGGAGGGT	5'	Yes	gp1b	....((((((..(((..((..(((((((((..((((((................))))))..)))))))))..))..))).)).))))...((((.....))))....	84	59.3	-41.3	192.501	129.852	244.54	246.37	265.642	362.487	192.624	285.18	188.087	156.2	315.744	128.776	middle
6	10	eca-miR-188-3p_1ss8AG	CTCCCACGTGCAGGGTTTGCA	21	X	+	48632378	48632485	ccctgctccctctctcaCATCCCTTGCATGGTGGAGGGTgagctttctgaaaacccCTCCCACGTGCAGGGTTTGCAggatggtgagcctcggcgtcctttgctctct	10	bta-mir-188,eca-mir-188,cfa-mir-188,hsa-mir-188,ptr-mir-188,ggo-mir-188,mml-mir-188,cgr-mir-188,mmu-mir-188,rno-mir-188,	eca-mir-188	tctcaCATCCCTTGCATGGTGGAGGGtgagctttctgaaaacccCTCCCACATGCAGGGTTTGCAgga	eca-miR-188-3p	CTCCCACATGCAGGGTTTGCA	3'	Diff	gp1b	....((((((..(((..((..(((((((((..((((((................))))))..)))))))))..))..))).)).))))...((((.....))))....	84	59.3	-41.3	22.7501	13.2502	14.4454	13.88	12.2982	16.5927	20.8034	15.0851	15.6017	16.2285	19.23	12.1998	middle
21	36	eca-miR-500	TAATCCTTGCTACCTGGGTGAGA	23	X	+	48637984	48638080	tgttctggctcccctctcTAATCCTTGCTACCTGGGTGAGAgtgctgtgtgaatgcaATGCACCTGGGCAAGGATTCTGAgagtgagagcatcatct	8	ssc-mir-500,eca-mir-500-1,cfa-mir-502,hsa-mir-500a,ptr-mir-500-1,ggo-mir-502b,mml-mir-500a,mml-mir-502,	eca-mir-500-1	gctccccctctcTAATCCTTGCTACCTGGGTGAGAgtgttgtctgaatgcaatgcacctgggcaaggattccgagagcgagagc	eca-miR-500	TAATCCTTGCTACCTGGGTGAGA	5'	Yes	gp1a	.......((((..(((((.(((((((((...(..((((....(((.........)))...))))..))))))))))..)))))...)))).......	83	51.5	-38.9	262.501	209.353	186.758	178.705	224.648	308.88	305.887	209.755	218.424	297.185	370.332	324.65	middle
21	37	ssc-miR-500_R+2	ATGCACCTGGGCAAGGATTCTGA	23	X	+	48637984	48638080	tgttctggctcccctctcTAATCCTTGCTACCTGGGTGAGAgtgctgtgtgaatgcaATGCACCTGGGCAAGGATTCTGAgagtgagagcatcatct	8	ssc-mir-500,eca-mir-500-1,cfa-mir-502,hsa-mir-500a,ptr-mir-500-1,ggo-mir-502b,mml-mir-500a,mml-mir-502,	ssc-mir-500	cccctctctaatccttgctacctgggtgagagtgctgtgtgaatgcaATGCACCTGGGCAAGGATTCTgagagtgagagc	ssc-miR-500	ATGCACCTGGGCAAGGATTCT	3'	Diff	gp1a	.......((((..(((((.(((((((((...(..((((....(((.........)))...))))..))))))))))..)))))...)))).......	83	51.5	-38.9	628.253	520.733	513.843	463.244	646.067	455.661	987.776	889.303	537.391	1322.63	851.082	429.027	middle
88	113	cgr-miR-500	AATGCACCTGGGCAAGGGTTC	21	X	+	48637994	48638069	cccctctctaatccttgctacctgggtgagagtgctgtgtgaatgcAATGCACCTGGGCAAGGATTCtgagagtga	6	bta-mir-502b,hsa-mir-501,ptr-mir-501,cgr-mir-500,mmu-mir-500,rno-mir-500,	cgr-mir-500	ctccccctctctaatccttgctatctaggtgctagtgctatctcaatgcAATGCACCTGGGCAAGGGTTCagagaaggtg	cgr-miR-500	AATGCACCTGGGCAAGGGTTC	3'	Yes	gp2	...(((((.(((((((((...(..((((....(((.........)))...))))..))))))))))..)))))...	70	52.6	-32.6	0	0	0	0	2.45964	0	0	4.31003	0	3.04285	0	0	low
13	24	ssc-miR-362_R-1	AATCCTTGGAACCTAGGTGTGAGT	24	X	+	48638449	48638551	gagccttctcatctgctccccctctcaAATCCTTGGAACCTAGGTGTGAGTgctgctctagtgcAACACACCTATTCAAGGATTcaaagaggctgagccttgt	11	ssc-mir-362,bta-mir-362,oar-mir-362,eca-mir-362,cfa-mir-362,hsa-mir-362,ptr-mir-362,ppy-mir-362,ggo-mir-362,mml-mir-362,cgr-mir-362,	ssc-mir-362	ccccctctcaAATCCTTGGAACCTAGGTGTGAGTGctgctctagtgcaacacacctattcaaggattcaaagaggctga	ssc-miR-362	AATCCTTGGAACCTAGGTGTGAGTG	5'	Diff	gp1a	(((....)))....((((..(((((..((((((((((...((((((((.(..(((...)))..)..))))))))))))))))))...)))))..)))).....	84	50.5	-40.8	171.501	100.702	95.9586	107.57	117.243	165.927	150.247	138.639	93.6101	162.285	194.161	171.475	middle
13	25	bta-miR-362-3p_R-1	AACACACCTATTCAAGGATT	20	X	+	48638449	48638551	gagccttctcatctgctccccctctcaAATCCTTGGAACCTAGGTGTGAGTgctgctctagtgcAACACACCTATTCAAGGATTcaaagaggctgagccttgt	11	ssc-mir-362,bta-mir-362,oar-mir-362,eca-mir-362,cfa-mir-362,hsa-mir-362,ptr-mir-362,ppy-mir-362,ggo-mir-362,mml-mir-362,cgr-mir-362,	bta-mir-362	ctcgAATCCTTGGAACCTAGGTGTGAGTgctgttctagtgcAACACACCTATTCAAGGATTCaaa	bta-miR-362-3p	AACACACCTATTCAAGGATTC	3'	Diff	gp1a	(((....)))....((((..(((((..((((((((((...((((((((.(..(((...)))..)..))))))))))))))))))...)))))..)))).....	84	50.5	-40.8	771.754	1077.24	531.384	813.714	869.894	1120.65	566.315	719.775	500.121	424.985	779.745	1017.33	middle
80	103	mmu-miR-362-5p_R-1	AATCCTTGGAACCTAGGTGTGAA	23	X	+	48638460	48638549	tctgctccccctctcaAATCCTTGGAACCTAGGTGTGAGtgctgctctagtgcaacacacctattcaaggattcaaagaggctgagcctt	1	mmu-mir-362,	mmu-mir-362	ctcgAATCCTTGGAACCTAGGTGTGAATgctgcttcagtgcAACACACCTGTTCAAGGATTCAaa	mmu-miR-362-5p	AATCCTTGGAACCTAGGTGTGAAT	5'	Diff	gp2	...((((..(((((..((((((((((...((((((((.(..(((...)))..)..))))))))))))))))))...)))))..))))...	84	50	-39.7	0	3.97506	0	0	1.63976	2.55272	1.54099	2.15502	0.86676	1.01428	0	0.677767	low
17	22	bta-miR-660_1ss20CT	TACCCATTGCATATCGGAGTTG	22	X	+	48640809	48640903	gaactgctccttctcccaTACCCATTGCATATCGGAGTTGtgaattctcaaagcACCTCCTATGTGCATGGTTTacaggagggcgagccctgtca	7	bta-mir-660,eca-mir-660,cfa-mir-660,hsa-mir-660,ptr-mir-660,ggo-mir-660,mml-mir-660,	bta-mir-660	ctgctccttctcccgTACCCATTGCATATCGGAGCTGtgaattctcaaagcacctcctatgtgcatggattacaggaggg	bta-miR-660	TACCCATTGCATATCGGAGCTG	5'	Diff	gp1b	((...((((..(((((.....(((.(((((((.((((.(((...........))).)))).))))))))))......)))))..))))....)).	94	50.5	-32.3	5225.52	6394.55	4079.79	4144.91	5330.87	5127.15	6342.72	6319.94	3493.91	5752	6309.92	3795.5	middle
17	23	bta-mir-660-p3_1ss18AT	ACCTCCTATGTGCATGGTTT	20	X	+	48640809	48640903	gaactgctccttctcccaTACCCATTGCATATCGGAGTTGtgaattctcaaagcACCTCCTATGTGCATGGTTTacaggagggcgagccctgtca	7	bta-mir-660,eca-mir-660,cfa-mir-660,hsa-mir-660,ptr-mir-660,ggo-mir-660,mml-mir-660,	bta-mir-660	ctgctccttctcccgTACCCATTGCATATCGGAGCTGtgaattctcaaagcacctcctatgtgcatggattacaggaggg	bta-mir-660-p3	acctcctatgtgcatggatt	3'	New	gp1b	((...((((..(((((.....(((.(((((((.((((.(((...........))).)))).))))))))))......)))))..))))....)).	94	50.5	-32.3	1.75001	1.32502	1.03181	0	0	0	0	3.59169	0	2.02857	2.48129	0	low
457	449	PC-3p-117359_6	GGTCCTGAGAGATGGGCGA	19	X	+	49413447	49413538	gcgcatgctcacacatactgctacacattcttcagagcaccgaggagagacaaagGGTCCTGAGAGATGGGAGAagagattgagtaatgggg	0						3'	New	gp4	...((((((((......((.((...(((..(((((..(.((.............)))..)))))..)))..)).))....)))))).))...	86	51.1	-19.8	0	0	0	3.46999	0	0	1.54099	0	0	0	0	1.35553	low
40	54	ssc-miR-151-5p_L+1R-3	CTCGAGGAGCTCACAGTCT	19	X	-	51324858	51324949	ggatccgtgctttggcagactttgtgcgcacaggctcgtttcatgcaggaagatgggcCTGGAGGAGCTCACAGTCTggtgggcagggagct	11	ssc-mir-151,bta-mir-151,eca-mir-151,cfa-mir-151,hsa-mir-151a,hsa-mir-151b,ptr-mir-151,ggo-mir-151a,cgr-mir-151,mmu-mir-151,rno-mir-151,	ssc-mir-151	ttttcctgcccTCGAGGAGCTCACAGTCTAGTacgtctcatcccctaCTAGACTGAAGCTCCTTGAGGAcagggatcgtc	ssc-miR-151-5p	TCGAGGAGCTCACAGTCTAGT	3'	Diff	gp2	((.(((.((((....((((((.((.((...((((((((((((......).))))))))))).....)).)).))))))...)))).))).))	92	59.8	-39.1	1.75001	1.98753	2.57953	1.735	2.45964	5.74363	1.15574	0.359169	2.1669	3.54999	0	1.69442	low
431	423	PC-3p-220268_3	CATTGACTCCTCCTGCTCCATAGT	24	X	-	51797110	51797189	aaGTATGTGAGCGGGGGGCTGGTGGGACcaggctgcctagccataggtatgccccCATTGACTCCTCCTGCTCCATAGGt	0						3'	New	gp4	...((((.((((((((((.(..((((....(((((((((....)))))).)))))))..)...))))))))))))))...	74	60	-39.5	0	3.97506	0	3.46999	0	1.27636	0	0	0.86676	3.04285	0	0	low
8	14	ssc-miR-98	TGAGGTAGTAAGTTGTATTGTT	22	X	-	51800843	51800961	aggattctgctcatgccggggTGAGGTAGTAAGTTGTATTGTTgtggggtagggattttaggccccaattagaagataaCTATACAACTTACTACTTTCCCtggggtgtagcatgttca	9	ssc-mir-98,bta-mir-98,eca-mir-98,cfa-mir-98,hsa-mir-98,ppa-mir-98,cgr-mir-98,mmu-mir-98,rno-mir-98,	ssc-mir-98	gggTGAGGTAGTAAGTTGTATTGTTgtggggtagggattttaggccccaattagaagataactatacaacttactacttt	ssc-miR-98	TGAGGTAGTAAGTTGTATTGTT	5'	Yes	gp1a	.((((..((((((..((((((.(((((((((((((((((.((((((((((...........)))))).........)))).)))))))))))))))))))))))..)).)))).)))).	117	44.5	-53.3	51138.7	50801.3	35539.8	31892.7	44847.5	48006.5	41239.3	31140.7	26282.8	38410.9	32915.5	23635.1	high
8	15	hsa-miR-98-3p_1ss22CT	CTATACAACTTACTACTTTCCT	22	X	-	51800843	51800961	aggattctgctcatgccggggTGAGGTAGTAAGTTGTATTGTTgtggggtagggattttaggccccaattagaagataaCTATACAACTTACTACTTTCCCtggggtgtagcatgttca	9	ssc-mir-98,bta-mir-98,eca-mir-98,cfa-mir-98,hsa-mir-98,ppa-mir-98,cgr-mir-98,mmu-mir-98,rno-mir-98,	hsa-mir-98	aggattctgctcatgccagggTGAGGTAGTAAGTTGTATTGTTgtggggtagggatattaggccccaattagaagataaCTATACAACTTACTACTTTCCCtggtgtgtggcatattca	hsa-miR-98-3p	CTATACAACTTACTACTTTCCC	3'	Diff	gp1a	.((((..((((((..((((((.(((((((((((((((((.((((((((((...........)))))).........)))).)))))))))))))))))))))))..)).)))).)))).	117	44.5	-53.3	953.754	1124.94	690.283	589.899	919.087	782.41	745.07	491.344	388.309	532.499	517.349	631.001	middle
32	54	ssc-let-7f	TGAGGTAGTAGATTGTATAGTT	22	X	-	51801728	51801810	tgtgggaTGAGGTAGTAGATTGTATAGTTttagggtcataccccatcttggagataaCTATACAGTCTACTGTCTTTCCcacg	3	ssc-let-7f-1,ptr-let-7f-2,mdo-let-7f-2,	ssc-let-7f-1	tgtgggaTGAGGTAGTAGATTGTATAGTTttagggtcataccccatcttggagataactatacagtctactgtctttcccacg	ssc-let-7f	TGAGGTAGTAGATTGTATAGTT	5'	Yes	gp1a	.((((((.(((..((((((((((((((((...(((.....))).(((.....)))))))))))))))))))..))))))))).	81	42.2	-40.7	367988	342131	346881	275434	317602	301428	390394	341087	293615	382837	296244	233598	high
32	55	mdo-let-7f-2-3p_1ss22CT	CTATACAGTCTACTGTCTTTCT	22	X	-	51801728	51801810	tgtgggaTGAGGTAGTAGATTGTATAGTTttagggtcataccccatcttggagataaCTATACAGTCTACTGTCTTTCCcacg	3	ssc-let-7f-1,ptr-let-7f-2,mdo-let-7f-2,	mdo-let-7f-2	gggaTGAGGTAGTAGATTGTATAGTTttagggtcacacccgatctcggagataaCTATACAGTCTACTGTCTTTCCcacg	mdo-let-7f-2-3p	CTATACAGTCTACTGTCTTTCC	3'	Diff	gp1a	.((((((.(((..((((((((((((((((...(((.....))).(((.....)))))))))))))))))))..))))))))).	81	42.2	-40.7	2040.51	2153.16	1270.16	1049.67	2015.27	1379.75	1531.75	1783.64	1927.67	1617.78	1299.57	1432.12	middle
19	25	mmu-mir-1949-p5	GGTTGGCATTCTGGGCCT	18	X	-	54752503	54752595	gggagaatagcagcccatagctGGTTGGCATTCTGGGCCTGGTTTATGCCAACTCTGTTGTtaactataccaggatgccagcatagttactta	3	cgr-mir-1949,mmu-mir-1949,rno-mir-1949,	mmu-mir-1949	gctggttggcattctgggcctggttcatgccacctctgttgttaaCTATACCAGGATGTCAGCATAGTTg	mmu-mir-1949-p5	ggttggcattctgggcct	5'	New	gp1b	(((..........))).(((((((((((((((((((...(((((.((..((....))..)).)))))..))))))))))))).))))))....	72	47.3	-34.8	5.25002	6.6251	3.09544	6.93999	3.27953	6.38181	2.31149	0.718339	0.86676	0	1.24064	3.38884	low
28	48	ssc-miR-1468	CTCCGTTTGCCTGTTTTGCTGA	22	X	-	56757042	56757135	tgaagaggtgggtggtttCTCCGTTTGCCTGTTTTGCTGAcgttcatttgactcattctcAGCAAAATAAGCAAATGGAAAattcatccatcaa	6	ssc-mir-1468,bta-mir-1468,eca-mir-1468,cfa-mir-1468,hsa-mir-1468,ppy-mir-1468,	ssc-mir-1468	tgggtggtttCTCCGTTTGCCTGTTTTGCTGAcgttcatttgactcattctcagcaaaataagcaaatggaaaattcatccat	ssc-miR-1468	CTCCGTTTGCCTGTTTTGCTGA	5'	Yes	gp1a	......((((((((..((.(((((((((.(((((((((((..................))))))))))).))))))))).))..))))))))..	86	40.4	-39.1	15.7501	14.5752	10.3181	31.23	19.6772	26.8036	73.1971	32.3252	41.6045	95.3426	32.2567	20.333	middle
7	11	hsa-miR-223-5p_R+2	CGTGTATTTGACAAGCTGAGTTGG	24	X	+	58752416	58752517	cctgcaatgccacgctcCGTGTATTTGACAAGCTGAGTTGGacactccatgtagtagagTGTCAGTTTGTCAAATACCCCAagtgcggcatatgcctagcag	8	bta-mir-223,eca-mir-223,cfa-mir-223,hsa-mir-223,ppy-mir-223,mml-mir-223,sla-mir-223,mmu-mir-223,	hsa-mir-223	cctggcctcctgcagtgccacgctcCGTGTATTTGACAAGCTGAGTTggacactccatgtggtagagTGTCAGTTTGTCAAATACCCCAagtgcggcacatgcttaccag	hsa-miR-223-5p	CGTGTATTTGACAAGCTGAGTT	5'	Diff	gp1b	...((((((((.((((....((((((((((((((......(((((((.........)))))))))))))))))))))....)))).))))).))).......	92	50	-41.1	792.754	736.712	1101.98	1073.96	532.103	306.327	695.758	777.961	596.331	791.141	670.568	552.38	middle
7	12	bta-miR-223	TGTCAGTTTGTCAAATACCCCA	22	X	+	58752416	58752517	cctgcaatgccacgctcCGTGTATTTGACAAGCTGAGTTGGacactccatgtagtagagTGTCAGTTTGTCAAATACCCCAagtgcggcatatgcctagcag	8	bta-mir-223,eca-mir-223,cfa-mir-223,hsa-mir-223,ppy-mir-223,mml-mir-223,sla-mir-223,mmu-mir-223,	bta-mir-223	cccagcctcctgcagtgccatgctccgtgtatttgacaagctgagttggacactccatgtagtagTGTCAGTTTGTCAAATACCCCAagtgtggcatatgcctagcag	bta-miR-223	TGTCAGTTTGTCAAATACCCCA	3'	Yes	gp1b	...((((((((.((((....((((((((((((((......(((((((.........)))))))))))))))))))))....)))).))))).))).......	92	50	-41.1	51672.5	42021.7	92173.9	102431	42614.2	28503.7	49740.1	51520.7	35772.1	46027.2	51791.9	59172.5	high
26	45	ssc-miR-676-3p	CCGTCCTAAGGTTGTTGAGTT	21	X	+	63280903	63281012	agacttcacatcagttcctgacctgaacgcgtgactcttcaatctcaggactcgcataattagcagaatgCCGTCCTAAGGTTGTTGAGTTctgcgtttctgggcatttc	5	ssc-mir-676-1,ssc-mir-676-2,ppy-mir-676,mml-mir-676-1,mml-mir-676-2,	ssc-mir-676-2	aacgcgtgaCTCTTCAATCTCAGGACTCGCAtaattagcagaatgCCGTCCTAAGGTTGTTGAGTTctgcgtttct	ssc-miR-676-3p	CCGTCCTAAGGTTGTTGAGTT	3'	Yes	gp1a	..................((.((((((((((..((((..((((((.(((((..((((..........)))).))))).))))))..))))..)))))))..)))))....	88	47.3	-35.6	35.0002	21.2003	35.0816	46.8449	34.435	29.3563	29.2789	22.9868	42.4713	24.3428	22.9519	25.0774	middle
313	305	PC-3p-178421_3	AAATTGACGCTACAGATTGGA	21	X	-	66975650	66975711	ttgttctagtctgatttcactgttttgggaagatttgAAATTGAAGCTACAGATTGGAagtt	0						3'	New	gp4	...((((((((((.(((((..(((((..(....)..))))))))))...))))))))))...	56	33.9	-16.6	0	0	0	0	0	3.82909	0	0	0	0	0	0	low
121	148	mmu-mir-8112-p5_1ss17GT	CTCCGCCACCTCCACCTCAGC	21	X	-	97294163	97294247	tgtgcctgcctcCTCCGCCACCTCCACCTCTGCctgcccgcctgccggtggctgtggtgacggcggcggcagctttggcggctcc	1	mmu-mir-8112,	mmu-mir-8112	ctccgcctcctccccccctcccaccccgcctgctctgcggcggaggcggcggcggcggcagcggtgtctctgccTCTCCGCCACCTCCACCGCAgcctctgacccccggccggcgttgttggcggggaggg	mmu-mir-8112-p5	CTCCGCCACCTCCACCGCAgc	5'	New	gp2	...(((.(((..(((((((.((..((((...(((.(((........))))))...))))..)).))))).))....))))))...	79	74.1	-39	0	0	0	3.46999	0.819882	0	1.54099	0	0	1.01428	3.10161	0.677767	low
188	180	PC-3p-222921_3	GCTGTCTGACCATCTGCCCT	20	X	+	103838737	103838894	gggtgatgagcagatggcggccgtggcctcagcacctgtgccctcacggggtgagggaggagaagtgagtccccagctctGTTGTCTGACCATCTGCCCTcttcctccaggtgcctacaccccggagcccctcagcagtttccggtgggcccttctct	0						3'	New	gp4	((((((((..((((..((((...(((.((((.(..((...(((((((...)))))))...))..)))))...)))...))))..))))..)))).)))).........(((.(((((....(((((((......))....))))))))))))).....	99	64.6	-59.9	0	0	0	0	3.27953	0	0	0	0	0	0	0	low
380	372	PC-3p-76245_12	CATTGTCAGGTGGGGAGT	18	X	-	104635415	104635488	caactttttggattcctaagacctgacgcagtggtggaatctttgCATTGTCAGGTGAGGAGTtagaaaagagc	0						3'	New	gp4	...(((((..(((((((...((((((((..(..(........)..)..)))))))).)))))))..)))))...	68	44.6	-25	0	1.32502	0	19.085	0	0	0.770496	3.59169	1.73352	1.01428	1.24064	0.677767	middle
18	24	bta-miR-1298	TTCATTCGGCTGTCCAGATGTA	22	X	+	108691592	108691715	tgttggaaagacgagaagttaagagTTCATTCGGCTGTCCAGATGTAtccaagtaccccgatatttggcaataaatacatctgggcaactgattgaacttttcacttttcatgattcaactgga	9	bta-mir-1298,eca-mir-1298,hsa-mir-1298,ptr-mir-1298,ppy-mir-1298,ggo-mir-1298,mml-mir-1298,mmu-mir-1298,rno-mir-1298,	bta-mir-1298	agatgagaagttaagagTTCATTCGGCTGTCCAGATGTAtccaagtaccctgatatttggcaataaatacatctgggcaactgattgaactttttgcttttcggactc	bta-miR-1298	TTCATTCGGCTGTCCAGATGTA	5'	Yes	gp1b	.((((((.....(((((((.(((((((((.((((.((((((((((((((((((((......)))))))......))))))))))))).)))).))))))))).)))))))....))))))....	119	39.5	-52.7	5.25002	1.32502	0	1.735	2.45964	0	0.770496	1.43668	0	0	1.86097	0	low
243	235	PC-5p-26039_59	GTGCAGTGATGTATTTTATC	20	X	-	109581212	109581292	gGTGCAGTGATGTATTTTGTCagtagggagctggtcaatttagggccgggatttaccttggtgatttacatcatacgcata	0						5'	New	gp4	.((((.((((((((..(..(((..(((...((((((.......))))))......))))))..)..))))))))..)))).	79	44.4	-27.7	10.5	7.95013	4.12725	5.20499	8.19882	17.8691	3.85248	0.718339	1.73352	1.01428	9.30483	5.42214	middle
29	49	bta-miR-2483-5p_L+2R-2	TCCGTCAACCATCCAGCTGTTT	22	X	-	117608166	117608301	tctagatgacacccaaatatgtgagtgaaaagtTCCGTCAACCATCCAGCTGTTTggggtgatgcaaacAAACATCTGGTTGGTTGAGAGAattttttacttagtctctggatgttttggagtcatttaacaggct	4	ssc-mir-2483,bta-mir-2483,eca-mir-2483,cfa-mir-2483,	bta-mir-2483	gagtgaaaagttcCGTCAACCATCCAGCTGTTTGAggtgatgcaaacAAACATCTGGTTGGTTGAGAGAattttttactt	bta-miR-2483-5p	CGTCAACCATCCAGCTGTTTGA	5'	Diff	gp1a	..((((((((..(((((....((((((((((((((..(((((((.((((.((((((..(.....)...)))))).)))).)))))))..))))))))))))))(((....)))..))))).)))))))).......	82	40.4	-50.9	3.50002	5.30008	9.28632	10.41	17.2175	12.7636	13.8689	15.0851	21.669	17.2428	16.7487	12.1998	middle
29	50	ssc-miR-2483	AAACATCTGGTTGGTTGAGAGA	22	X	-	117608166	117608301	tctagatgacacccaaatatgtgagtgaaaagtTCCGTCAACCATCCAGCTGTTTggggtgatgcaaacAAACATCTGGTTGGTTGAGAGAattttttacttagtctctggatgttttggagtcatttaacaggct	4	ssc-mir-2483,bta-mir-2483,eca-mir-2483,cfa-mir-2483,	ssc-mir-2483	tgaaaagttccgtcaaccatccagctgtttggggtgatgcaaacAAACATCTGGTTGGTTGAGAGAattttttact	ssc-miR-2483	AAACATCTGGTTGGTTGAGAGA	3'	Yes	gp1a	..((((((((..(((((....((((((((((((((..(((((((.((((.((((((..(.....)...)))))).)))).)))))))..))))))))))))))(((....)))..))))).)))))))).......	82	40.4	-50.9	3.50002	2.65004	7.22269	10.41	19.6772	17.8691	9.24595	13.6484	13.0014	14.2	6.82354	21.0108	middle
14	26	hsa-miR-363-5p	CGGGTGGATCACGATGCAATTT	22	X	-	126199342	126199433	ctgttttgctgttgtCGGGTGGATCACGATGCAATTTtgattagtatcataggagaaaAATTGCACGGTATCCATCTGTaaaccgcaggacc	12	ssc-mir-363-2,ssc-mir-363-1,bta-mir-363,eca-mir-363,cfa-mir-363,hsa-mir-363,ppy-mir-363,ggo-mir-363,mmu-mir-363,rno-mir-363,mdo-mir-363,oan-mir-363,	hsa-mir-363	tgttgtCGGGTGGATCACGATGCAATTTtgatgagtatcataggagaaaAATTGCACGGTATCCATCTGTAaacc	hsa-miR-363-5p	CGGGTGGATCACGATGCAATTT	5'	Yes	gp1a	..((..(((.(((..(((((((((..((.(((((((((..(((......)))....)))))))))))..)))))))))..))).)))..)).	89	43.5	-33.8	7.00003	9.27515	14.4454	6.93999	4.91929	19.1454	10.0164	27.2969	32.9369	27.3856	16.1284	6.0999	middle
14	27	ssc-miR-363_R-2	AATTGCACGGTATCCATCTGT	21	X	-	126199342	126199433	ctgttttgctgttgtCGGGTGGATCACGATGCAATTTtgattagtatcataggagaaaAATTGCACGGTATCCATCTGTaaaccgcaggacc	12	ssc-mir-363-2,ssc-mir-363-1,bta-mir-363,eca-mir-363,cfa-mir-363,hsa-mir-363,ppy-mir-363,ggo-mir-363,mmu-mir-363,rno-mir-363,mdo-mir-363,oan-mir-363,	ssc-mir-363-1	gctgttgtcgggtggatcacgatgcaattttgattagtatcataggagaaaAATTGCACGGTATCCATCTGTAAaccgca	ssc-miR-363	AATTGCACGGTATCCATCTGTAA	3'	Diff	gp1a	..((..(((.(((..(((((((((..((.(((((((((..(((......)))....)))))))))))..)))))))))..))).)))..)).	89	43.5	-33.8	18009.3	19170.4	16434.7	19194.3	15352.3	18031.2	13905.1	15663.4	19344.4	15810.6	15477.7	21357.1	high
25	33	ssc-miR-92a_R+1	TATTGCACTTGTCCCGGCCTGTT	23	X	-	126199466	126199552	accctttcatccgtgggtggggatttgttgcattacttgtggtgtgtataaagTATTGCACTTGTCCCGGCCTGTGgaagaaaggag	45	ssc-mir-92a-1,ssc-mir-92b,bta-mir-92a-1,bta-mir-92b,eca-mir-92a,eca-mir-92b,eca-mir-19b,cfa-mir-92a-1,cfa-mir-92b,hsa-mir-92b,ptr-mir-92b,ppy-mir-92b,mml-mir-92b,cgr-mir-92a,cgr-mir-92b,mmu-mir-92a-1,mmu-mir-92a-2,mmu-mir-92b,rno-mir-92a-1,rno-mir-92a-2,rno-mir-92b,mdo-mir-92a-1,mdo-mir-92b,oan-mir-92a-2,oan-mir-92b,oan-mir-19b-1,oan-mir-19b-2,	ssc-mir-92a-1	ctttctacacaggttgggatcggttgcaatgctgtgtttctgtatggTATTGCACTTGTCCCGGCCTGTtgagtttggtg	ssc-miR-92a	TATTGCACTTGTCCCGGCCTGT	3'	Diff	gp2	..((((((.((((..((..(((((..((.(((.(((((............))))).)))))..)))))..))..)))).))))))..	83	48.3	-40.6	31661.1	36973.4	39893	28497.3	33320	24706.5	43260.3	45185.7	46838.9	46286.8	35992.3	35303.5	high
7	12	hsa-miR-92a-2-5p_R+1	GGGTGGGGATTTGTTGCATTACT	23	X	-	126199512	126199591	ctttcatccgtGGGTGGGGATTTGTTGCATTACTtgtggtgtgtataaagTATTGCACTTGTCCCGGCCTGTggaagaaa	8	ssc-mir-92a-2,bta-mir-92a-2,eca-mir-92a-2,cfa-mir-92a-2,hsa-mir-92a-2,ptr-mir-92-2,lca-mir-92-2,mdo-mir-92a-2,	hsa-mir-92a-2	tcatccctGGGTGGGGATTTGTTGCATTACttgtgttctatataaagTATTGCACTTGTCCCGGCCTGTggaaga	hsa-miR-92a-2-5p	GGGTGGGGATTTGTTGCATTAC	5'	Diff	gp1a	.((((.((((..((..(((((..(.((((.(((((............))))).)))))..)))))..))..)))).))))	79	46.2	-33.3	0	0	3.09544	3.46999	0.819882	1.27636	3.08198	5.74671	3.46704	3.04285	4.34225	0	low
7	13	ssc-miR-92a	TATTGCACTTGTCCCGGCCTGT	22	X	-	126199512	126199591	ctttcatccgtGGGTGGGGATTTGTTGCATTACTtgtggtgtgtataaagTATTGCACTTGTCCCGGCCTGTggaagaaa	8	ssc-mir-92a-2,bta-mir-92a-2,eca-mir-92a-2,cfa-mir-92a-2,hsa-mir-92a-2,ptr-mir-92-2,lca-mir-92-2,mdo-mir-92a-2,	ssc-mir-92a-2	ctttcatccgtgggtggggatttgttgcattacttgtggtgtgtataaagTATTGCACTTGTCCCGGCCTGTggaagaaa	ssc-miR-92a	TATTGCACTTGTCCCGGCCTGT	3'	Yes	gp1a	.((((.((((..((..(((((..(.((((.(((((............))))).)))))..)))))..))..)))).))))	79	46.2	-33.3	203622	246392	261472	204938	221739	156442	281997	258360	240523	269277	194796	218356	high
4	7	ssc-miR-19b_R-1	TGTGCAAATCCATGCAAAACTG	22	X	-	126199645	126199741	gacactgctacttacagttAGTTTTGCAGGTTTGCATTTCAGCgtatgtatgtgtatatggcTGTGCAAATCCATGCAAAACTGattgtgatgatgt	9	ssc-mir-19b-2,bta-mir-19b-2,eca-mir-19b-2,cfa-mir-19b-2,hsa-mir-19b-2,ptr-mir-19b-2,age-mir-19b-2,sla-mir-19b-2,rno-mir-19b-2,	ssc-mir-19b-2	tacagttagttttgcaggtttgcatttcagcgtatgtatgtgtatatggcTGTGCAAATCCATGCAAAACTGAttgtgat	ssc-miR-19b	TGTGCAAATCCATGCAAAACTGA	3'	Diff	gp1a	...........(((((((((((((((((((((((((...((((.((((((....)))))))))))))))).)).)))))))))))))))))......	80	39.2	-38.2	80215.1	57259.5	28694.7	50415.6	38961.6	45843.1	34342.6	25997.4	33499.4	31161.8	25365	59737	high
5	8	ssc-miR-20b_R-2	CAAAGTGCTCACAGTGCAGGT	21	X	-	126199775	126199854	ccggcagtacCAAAGTGCTCACAGTGCAGGTaggttttgcattacTCTACTGTAGTGTGGGCACTtccagtactcttgga	5	ssc-mir-20b-2,bta-mir-20b,eca-mir-20b,cfa-mir-20b,mml-mir-20b,	ssc-mir-20b-2	ccggcagtacCAAAGTGCTCACAGTGCAGGTAGgttttgcattactctactgtagtgtgggcacttccagtactcttgga	ssc-miR-20b	CAAAGTGCTCACAGTGCAGGTAG	5'	Diff	gp1a	(((..(((((..(((((((((((.(((((.(((((........)).)))))))).)))))))))))...)))))..))).	79	50	-35.8	3105.39	3025.02	3043.33	3898.54	2986.01	3805.47	2142.75	2464.62	3654.69	1751.16	3017.87	6209.7	middle
5	9	ssc-mir-20b-2-p3	TCTACTGTAGTGTGGGCACT	20	X	-	126199775	126199854	ccggcagtacCAAAGTGCTCACAGTGCAGGTaggttttgcattacTCTACTGTAGTGTGGGCACTtccagtactcttgga	5	ssc-mir-20b-2,bta-mir-20b,eca-mir-20b,cfa-mir-20b,mml-mir-20b,	ssc-mir-20b-2	ccggcagtacCAAAGTGCTCACAGTGCAGGTAGgttttgcattactctactgtagtgtgggcacttccagtactcttgga	ssc-mir-20b-2-p3	tctactgtagtgtgggcact	3'	New	gp1a	(((..(((((..(((((((((((.(((((.(((((........)).)))))))).)))))))))))...)))))..))).	79	50	-35.8	61.2503	82.1513	111.436	74.6049	83.6279	118.702	29.2789	30.1702	35.5372	21.2999	40.9413	30.4995	middle
3	5	ssc-miR-18b_R-2	TAAGGTGCATCTAGTGCAGTT	21	X	-	126200004	126200109	ataatgtgtctcttgtgtTAAGGTGCATCTAGTGCAGTTagtgaagcagcttagaatcTACTGCCCTAAATGCCCCTTCTggcacaggctgcctaatacacagcat	8	ssc-mir-18b,bta-mir-18b,eca-mir-18b,cfa-mir-18b,hsa-mir-18b,ptr-mir-18b,ggo-mir-18b,mmu-mir-18b,	ssc-mir-18b	tctcttgtgtTAAGGTGCATCTAGTGCAGTTAGtgaagcagcttagaatctactgccctaaatgccccttctggcacaggctg	ssc-miR-18b	TAAGGTGCATCTAGTGCAGTTAG	5'	Diff	gp1a	....(((((..(((((((.((((.((((.(((.(((((..((.............))..))))).))).)))).))))...))))))).........)))))....	98	45.3	-28	962.504	931.49	1200	1497.3	989.597	1281.47	893.005	655.843	793.086	541.627	962.74	971.918	middle
3	6	mmu-miR-18b-3p	TACTGCCCTAAATGCCCCTTCT	22	X	-	126200004	126200109	ataatgtgtctcttgtgtTAAGGTGCATCTAGTGCAGTTagtgaagcagcttagaatcTACTGCCCTAAATGCCCCTTCTggcacaggctgcctaatacacagcat	8	ssc-mir-18b,bta-mir-18b,eca-mir-18b,cfa-mir-18b,hsa-mir-18b,ptr-mir-18b,ggo-mir-18b,mmu-mir-18b,	mmu-mir-18b	tctcttgtgtTAAGGTGCATCTAGTGCTGTTAGtgaagcagcttacaatcTACTGCCCTAAATGCCCCTTCTcgcacaggcta	mmu-miR-18b-3p	TACTGCCCTAAATGCCCCTTCT	3'	Yes	gp1a	....(((((..(((((((.((((.((((.(((.(((((..((.............))..))))).))).)))).))))...))))))).........)))))....	98	45.3	-28	17.5001	10.6002	11.3499	19.085	6.55905	12.7636	6.16397	8.62007	11.2679	8.11426	16.1284	18.9775	middle
8	10	ssc-miR-18a_R-1	TAAGGTGCATCTAGTGCAGAT	21	X	-	126200052	126200143	cataatgtgtctcttgtgtTAAGGTGCATCTAGTGCAGTTagtgaagcagcttagaatctactgccctaaatgccccttctggcacaggctg	17	ssc-mir-18a,bta-mir-18a,bta-mir-106b,oar-mir-106b,eca-mir-18a,eca-mir-106b,cfa-mir-106b,hsa-mir-106b,ggo-mir-18b,mml-mir-106b,lla-mir-106b,cgr-mir-18a,cgr-mir-106b,mmu-mir-18a,mmu-mir-106a,mmu-mir-106b,mdo-mir-18a,	ssc-mir-18a	gtgctttttgttcTAAGGTGCATCTAGTGCAGATAgtgaagtagattagcatctactgccctaagtgctccttctggcataagaagttatgt	ssc-miR-18a	TAAGGTGCATCTAGTGCAGATA	5'	Diff	gp2	............(((((((.((((.((((.(((.(((((..((.............))..))))).))).)))).))))...)))))))...	77	46.7	-25.9	4833.52	3422.53	4976.43	6872.32	3872.3	4564.27	3627.5	3206.66	3500.84	3288.31	4442.75	5280.48	middle
9	16	ssc-miR-106a_R-1_1ss1AC	CAAAGTGCTTACAGTGCAGGTAG	23	X	-	126200183	126200263	ccttggccgtgtAAAAGTGCTTACAGTGCAGGTAGctttttgagatcTACTGCAATGCAAGCACTTCTtacattaccatgg	6	ssc-mir-106a,bta-mir-106a,eca-mir-106a,cfa-mir-106a,hsa-mir-106a,rno-mir-17-2,	ssc-mir-106a	ccttggccgtgtAAAAGTGCTTACAGTGCAGGTAGCtttttgagatctactgcaatgcaagcacttcttacattaccatgg	ssc-miR-106a	AAAAGTGCTTACAGTGCAGGTAGC	5'	Diff	gp1a	((.(((..((((((((((((((.((.(((((.(((.((.....)).)))))))).)).)))))))).))))))..))).))	81	44.4	-30.4	23011.7	17050.4	18950.8	24885.1	17076.5	20061.2	14829.7	15294.9	20892.8	13106.1	19473.8	36509.3	high
9	17	hsa-miR-106a-3p_L+2R-3_1ss11TC	TACTGCAATGCAAGCACTTCT	21	X	-	126200183	126200263	ccttggccgtgtAAAAGTGCTTACAGTGCAGGTAGctttttgagatcTACTGCAATGCAAGCACTTCTtacattaccatgg	6	ssc-mir-106a,bta-mir-106a,eca-mir-106a,cfa-mir-106a,hsa-mir-106a,rno-mir-17-2,	hsa-mir-106a	ccttggccatgtAAAAGTGCTTACAGTGCAGGTAGctttttgagatctaCTGCAATGTAAGCACTTCTTACattaccatgg	hsa-miR-106a-3p	CTGCAATGTAAGCACTTCTTAC	3'	Diff	gp1a	((.(((..((((((((((((((.((.(((((.(((.((.....)).)))))))).)).)))))))).))))))..))).))	81	44.4	-30.4	80.5004	113.952	86.6723	116.245	98.3858	122.531	67.8037	73.9889	90.1431	57.8141	83.1232	135.553	middle
7	9	ssc-miR-17-5p_L-1R+1	AAAGTGCTTACAGTGCAGGTAGT	23	X	-	126200205	126200304	cgggaataggccttggccgtgtaAAAGTGCTTACAGTGCAGGTAGCtttttgagatctactgcaatgcaagcacttcttacattaccatggtgatttaat	31	ssc-mir-17,ssc-mir-20a,bta-mir-17,bta-mir-106b,oar-mir-17,oar-mir-106b,eca-mir-17,eca-mir-106b,cfa-mir-17,cfa-mir-20a,cfa-mir-106b,hsa-mir-106b,ppy-mir-17,mml-mir-106b,lla-mir-106b,lca-mir-20,cgr-mir-17,cgr-mir-20a,cgr-mir-106b,mmu-mir-17,mmu-mir-20a,mmu-mir-106b,rno-mir-17-1,rno-mir-20a,mdo-mir-17,mdo-mir-20a,mdo-mir-106,oan-mir-17,oan-mir-106,oan-mir-20a-2,oan-mir-20a-1,	ssc-mir-17	gaataatgtCAAAGTGCTTACAGTGCAGGTAGtgataatgtgcatctACTGCAGTGAAGGCACTTGTAGcattatgg	ssc-miR-17-5p	CAAAGTGCTTACAGTGCAGGTAG	5'	Diff	gp2	...((((..(((.(((..((((((((((((((.((.(((((.(((.((.....)).)))))))).)).)))))))).))))))..))).))).))))...	94	43	-34.5	138.251	145.752	147.549	166.56	107.814	112.958	101.705	28.3744	34.237	27.8928	31.0161	35.2439	middle
22	20	PC-5p-123228_6	TGGGCCGTGCCTTCTCGAGGGGC	23	X	+	127253052	127253140	tccgccgtcTGGGCCGTGCCTTCTCGAGGGGCccgtctcctttgcgtgtcacttgggggCCCGAGAAGCGCACTGCCGAGCacggcagg	0						5'	New	gp4	.(((((((((.(((.((((((((((...((((((....((..............)))))))))))))).)))).))).)).))))).))	88	70.8	-46.6	0	0	1.03181	3.46999	1.63976	0	4.62298	2.15502	5.20056	3.04285	1.24064	3.38884	low
22	21	PC-3p-57168_19	CCCGAGAAGCGCACTGCCGAGC	22	X	+	127253052	127253140	tccgccgtcTGGGCCGTGCCTTCTCGAGGGGCccgtctcctttgcgtgtcacttgggggCCCGAGAAGCGCACTGCCGAGCacggcagg	0						3'	New	gp4	.(((((((((.(((.((((((((((...((((((....((..............)))))))))))))).)))).))).)).))))).))	88	70.8	-46.6	0	3.97506	0	1.735	3.27953	1.27636	3.08198	3.59169	1.73352	5.07142	4.96258	0.677767	low
22	38	ssc-miR-504_L-1R-1	GACCCTGGTCTGCACTCTATC	21	X	+	129654203	129654304	gctgctgttgggaGACCCTGGTCTGCACTCTATCtgtatgcttactgaAGGGAGCGCAGGGCAGGGTTTCccacacagagggcacaggcaaccaccgcatgg	9	ssc-mir-504,bta-mir-504,eca-mir-504,hsa-mir-504,ptr-mir-504,ggo-mir-504,mml-mir-504,mmu-mir-504,rno-mir-504,	ssc-mir-504	gctgttgggAGACCCTGGTCTGCACTCTATCTgtatgcttactgaagggagcgcagggcagggtttcccacacagagggc	ssc-miR-504	AGACCCTGGTCTGCACTCTATCT	5'	Diff	gp1a	(((.((((((((((((((((..((((.((((.((.(((....))).))..)))).))))..)))))))))))).))))..))).((.((.......)).)).	83	59.8	-49.5	21.0001	14.5752	81.5132	65.9299	47.5531	25.5272	92.4595	345.521	75.4081	110.557	264.257	82.6876	middle
23	39	cfa-miR-505_R+1	GGGAGCCAGGAAGTATTGATGTT	23	X	-	130835619	130835730	taaattgatgcactcagtggGGGAGCCAGGAAGTATTGATGTTtctgccaggttagCGTCAACACTTGCTGGTTTCCTctctggagcatcactgagttcgtggattttcatt	9	ssc-mir-505,bta-mir-505,eca-mir-505,cfa-mir-505,ptr-mir-505,ggo-mir-505,cgr-mir-505,mmu-mir-505,rno-mir-505,	cfa-mir-505	cagtggGGGAGCCAGGAAGTATTGATGTttctgccagtttagcgtcaacacttgctggtttcctctctggagcatc	cfa-miR-505	GGGAGCCAGGAAGTATTGATGT	5'	Diff	gp1a	.....((((((.(.(((.(((((((((((.((((.((((((((.((....))..)))))))).)))).))))))))))).)))).))))))..(((((....))))).....	86	46.4	-47	28.0001	34.4505	48.4952	45.1099	54.9321	62.5418	58.5577	66.0872	50.2721	57.8141	58.9306	45.4104	middle
23	40	ssc-miR-505_L+2R-2	CGTCAACACTTGCTGGTTTCCT	22	X	-	130835619	130835730	taaattgatgcactcagtggGGGAGCCAGGAAGTATTGATGTTtctgccaggttagCGTCAACACTTGCTGGTTTCCTctctggagcatcactgagttcgtggattttcatt	9	ssc-mir-505,bta-mir-505,eca-mir-505,cfa-mir-505,ptr-mir-505,ggo-mir-505,cgr-mir-505,mmu-mir-505,rno-mir-505,	ssc-mir-505	gcactcagtgggggagccaggaagtattgatgtttctgccaggttagcgTCAACACTTGCTGGTTTCCTCTctggagcat	ssc-miR-505	TCAACACTTGCTGGTTTCCTCT	3'	Diff	gp1a	.....((((((.(.(((.(((((((((((.((((.((((((((.((....))..)))))))).)))).))))))))))).)))).))))))..(((((....))))).....	86	46.4	-47	1106.01	952.69	1217.54	1289.1	1210.15	1280.19	1205.83	1247.04	1090.38	1511.28	1593.61	1444.32	middle
21	18	PC-5p-121132_6	TTCACAAGAAGGTGTCAATTC	21	X	-	137139936	137140075	gggtagggccgccacatggagccattcagcgtgcagtgcttTTCACAAGAAGGTGTCAATTCaggtggactaaaatatgAATGGCGCTTTTTTGTGAAGagtaatggacaccatgtaaggcacaggtggtggccctgggg	0						5'	New	gp4	...((((((((((((.((..(((...((..((.((.((((((((((((((((((((((.((((..(........)..)))))))))))))))))))))))))).)).))....))...))).)).))))))))))))...	134	51.4	-68.1	0	0	3.09544	0	0.819882	2.55272	0	0	0	0	0	1.35553	low
21	19	PC-3p-60516_17	AATGGCGCTTTTTTGTGAAG	20	X	-	137139936	137140075	gggtagggccgccacatggagccattcagcgtgcagtgcttTTCACAAGAAGGTGTCAATTCaggtggactaaaatatgAATGGCGCTTTTTTGTGAAGagtaatggacaccatgtaaggcacaggtggtggccctgggg	0						3'	New	gp4	...((((((((((((.((..(((...((..((.((.((((((((((((((((((((((.((((..(........)..)))))))))))))))))))))))))).)).))....))...))).)).))))))))))))...	134	51.4	-68.1	0	0	1.03181	6.93999	5.73917	3.82909	0	0	4.3338	0	0	7.45544	low
15	20	eca-miR-509a-5p_R+1_1ss10CG	TACTGCAGAGAGTGGCAATCAT	22	X	-	137225792	137225881	catactgtgtgtgctacccTACTGCAGAGAGTGGCAATCATgtataattaaaaatgattgacacctctgttagtggagtaacatatgaca	1	eca-mir-509a,	eca-mir-509a	catactgtgtgtggtacccTACTGCAGACAGTGGCAATCAtgtataattaaaaatgattgacacctctgcaagtgtagtaacacatgacacatgagat	eca-miR-509a-5p	TACTGCAGACAGTGGCAATCA	5'	Diff	gp1b	.....((((((((.(((.(((((((((((.(((.(((((((............))))))).))))))))).))))).))).))))).)))	85	38.9	-32.7	1.75001	0	1.03181	1.735	7.37893	1.27636	0	1.43668	5.20056	2.02857	0.620322	2.0333	low
20	34	ssc-miR-452_1ss22AT	AACTGTTTGCAGAGGAAACTGT	22	X	-	140861113	140861195	gctaagcacttacAACTGTTTGCAGAGGAAACTGAgactttgtaactacatcTCAGTCTCAACTGCAAAGAAGTaagtgctta	7	ssc-mir-452,bta-mir-452,cfa-mir-452,hsa-mir-452,ptr-mir-452,mmu-mir-452,rno-mir-452,	ssc-mir-452	aagcacttacAACTGTTTGCAGAGGAAACTGAgactttgtaactacatctcagtctcaactgcaaagaagtaagtgctta	ssc-miR-452	AACTGTTTGCAGAGGAAACTGA	5'	Diff	gp1a	..(((((((((((..((..((((((..((.(((((((...(((....)))))))))).))..))))))))..)))))))))))	81	39.8	-35.5	0	0	0	0	0	0	1.54099	0	0.86676	7.09998	1.86097	0.677767	low
20	35	mmu-miR-452-3p_2ss10TA20GA	TCAGTCTCAACTGCAAAGAAGT	22	X	-	140861113	140861195	gctaagcacttacAACTGTTTGCAGAGGAAACTGAgactttgtaactacatcTCAGTCTCAACTGCAAAGAAGTaagtgctta	7	ssc-mir-452,bta-mir-452,cfa-mir-452,hsa-mir-452,ptr-mir-452,mmu-mir-452,rno-mir-452,	mmu-mir-452	gctaagcagttacaacTGTTTGCAGAGGAAACTGAGACtttataactatgtcTCAGTCTCATCTGCAAAGAGGTaagtgctttgc	mmu-miR-452-3p	TCAGTCTCATCTGCAAAGAGGT	3'	Diff	gp1a	..(((((((((((..((..((((((..((.(((((((...(((....)))))))))).))..))))))))..)))))))))))	81	39.8	-35.5	1.75001	0	0	3.46999	0.819882	1.27636	6.93447	3.59169	1.73352	8.11426	1.24064	2.71107	low
356	348	PC-3p-29045_50	CCGGCCTCGCCTCCTCCTCCC	21	X	-	142013181	142013258	caggctgggggtggngggggcggggggaggaagcagtCCGGCCTCGCCCCCTCCTCCCtctannnnnnnnaaggcgcc	0						3'	New	gp4	...((((((((.((.((((((((((...(((.....)))..)))))))))).)).)))))............)))...	72	67.9	-40.5	17.5001	11.9252	6.19088	36.4349	9.0187	21.6982	6.93447	2.87336	2.60028	5.07142	6.20322	7.45544	middle
433	425	PC-3p-383480_2	CTGGCGGCCACTGCCTTTGGGG	22	X	-	144180566	144180637	gtggctCCCAAAGGCGTGGCTCTCAGCtacacctttgtttgggtgCTGGCGGCCACTGCCTTTGGGGgtgtc	0						3'	New	gp4	...((((((((((((((((((..((((.((.((.......))))))))..)))))).))))))))))))...	66	62.5	-44	0	0	0	3.46999	0.819882	1.27636	0	0	0	0	0	0	low
1	1	hsa-miR-1-3p_L-4_1ss22TC	ATGTAAAGAAGTATGTAC	18					tgggaaACATACTTCTTTATATGCCCATatggacctgctaagctaTGGAATGTAAAGAAGTATGTATctca	18	hsa-mir-1-1,ssc-mir-1,bta-mir-1-2,bta-mir-1-1,eca-mir-1-1,eca-mir-1-2,ptr-mir-1-1,ptr-mir-1-2,ggo-mir-1,mml-mir-1-2,mml-mir-1-1,mmu-mir-1a-1,mmu-mir-1a-2,rno-mir-1b,mdo-mir-1-1,mdo-mir-1-2,oan-mir-1a,	hsa-mir-1-1	tgggaaACATACTTCTTTATATGCCCATatggacctgctaagctaTGGAATGTAAAGAAGTATGTATctca	hsa-miR-1-3p	TGGAATGTAAAGAAGTATGTAT	3'	Diff	gp3	.((((.((((((((((((((((..((((((((.....)))...))))).)))))))))))))))).)))).	69	36.6	-30	0	0	0	67.6649	0	2.55272	6.16397	0	0	2.02857	0	1.35553	middle
2	2	oan-miR-9-3p_R+1	TAAAGCTAGAGAACCGAATGTA	22					ggggccggatcgcactgagctggctttggTCTTTGGTTATCTAGCTGTATGagtgtatgtgatgtcaTAAAGCTAGAGAACCGAATGTaaaaaccagcttccgccgtcacagccccggcccc	34	oan-mir-9-1,ssc-mir-9-1,ssc-mir-9-3,ssc-mir-9-2,bta-mir-9-1,eca-mir-9a-2,eca-mir-9a,cfa-mir-9-1,cfa-mir-9-3,cfa-mir-9-2,hsa-mir-9-3,ptr-mir-9-1,ppy-mir-9-2,mml-mir-9-3,cgr-mir-9,mmu-mir-9-2,rno-mir-9a-3,mdo-mir-9a-1,mdo-mir-9a-3,sha-mir-9,oan-mir-9-2,	oan-mir-9-1	ggggccggatcgcactgagctggctttggTCTTTGGTTATCTAGCTGTATGagtgtatgtgatgtcaTAAAGCTAGAGAACCGAATGTaaaaaccagcttccgccgtcacagccccggcccc	oan-miR-9-3p	TAAAGCTAGAGAACCGAATGT	3'	Diff	gp3	((((((((........(((((((.(((....(((((((.(((((((.(((((............))))).))))))).)))))))....))).)))))))..((.......)).))))))))	84	53.3	-51.2	3.50002	0	4.12725	0	0	7.65817	5.39347	0	0	0	1.86097	0.677767	low
3	3	oan-miR-15b-5p_R-1	TAGCAGCACATCATGGTTTG	20					aatcctgcatgtggaggccttggactgctaTAGCAGCACATCATGGTTTGCatggtatagccaagatgCGAATCATTATTTGCTGCTTTagaaatttaaggaaaagaaacctttcaagacatggcttatt	10	oan-mir-15b,ssc-mir-15b,bta-mir-15b,eca-mir-15b,cfa-mir-15b,hsa-mir-15b,mml-mir-15b,cgr-mir-15b,rno-mir-15b,oan-mir-15c,	oan-mir-15b	aatcctgcatgtggaggccttggactgctaTAGCAGCACATCATGGTTTGCatggtatagccaagatgCGAATCATTATTTGCTGCTTTagaaatttaaggaaaagaaacctttcaagacatggcttatt	oan-miR-15b-5p	TAGCAGCACATCATGGTTTGC	5'	Diff	gp3	.......(((((.....((((..(...(((.(((((((.((.(((((((((((((.....)))...)))))))))).)).))))))).)))...)..))))....(((....)))...))))).......	84	40	-40.1	10.5	17.2253	3.09544	24.29	7.37893	6.38181	6.93447	2.87336	2.60028	8.11426	8.68451	14.2331	middle
3	4	oan-miR-15b-3p_L+2R-1_1ss3CT	TGTGAATCATTATTTGCTGCTT	22					aatcctgcatgtggaggccttggactgctaTAGCAGCACATCATGGTTTGCatggtatagccaagatgCGAATCATTATTTGCTGCTTTagaaatttaaggaaaagaaacctttcaagacatggcttatt	10	oan-mir-15b,ssc-mir-15b,bta-mir-15b,eca-mir-15b,cfa-mir-15b,hsa-mir-15b,mml-mir-15b,cgr-mir-15b,rno-mir-15b,oan-mir-15c,	oan-mir-15b	aatcctgcatgtggaggccttggactgctaTAGCAGCACATCATGGTTTGCatggtatagccaagatgCGAATCATTATTTGCTGCTTTagaaatttaaggaaaagaaacctttcaagacatggcttatt	oan-miR-15b-3p	CGAATCATTATTTGCTGCTTT	3'	Diff	gp3	.......(((((.....((((..(...(((.(((((((.((.(((((((((((((.....)))...)))))))))).)).))))))).)))...)..))))....(((....)))...))))).......	84	40	-40.1	0	0	0	0	0	1.27636	11.5574	7.18339	8.6676	7.09998	6.20322	9.48874	middle
4	5	ssc-miR-16_L+3	ATCTAGCAGCACGTAAATATTGGCG	25					tccgctcTAGCAGCACGTAAATATTGGCGtagtaaaataaatattaaacaccaatattattgtgctgctttagcgtg	22	ssc-mir-16-1,oar-mir-16b,eca-mir-16-1,cfa-mir-16-2,hsa-mir-16-2,ptr-mir-16-2,ppy-mir-16-2,mml-mir-16-2,mmu-mir-16-2,rno-mir-16,mdo-mir-16-2,oan-mir-16b,oan-mir-16c,	ssc-mir-16-1	tccgctcTAGCAGCACGTAAATATTGGCGtagtaaaataaatattaaacaccaatattattgtgctgctttagcgtg	ssc-miR-16	TAGCAGCACGTAAATATTGGCG	5'	Diff	gp3	..((((..(((((((((..((((((((.((((((.......))))..)).))))))))..)))))))))..))))..	73	36.4	-30.6	249.376	190.141	110.404	137.065	159.877	202.942	126.361	121.04	173.352	112.585	132.129	185.369	middle
4	6	hsa-miR-16-2-3p_L+1R-1_1ss11CT	ACCAATATTATTGTGCTGCTTT	22					tccgctcTAGCAGCACGTAAATATTGGCGtagtaaaataaatattaaacaccaatattattgtgctgctttagcgtg	22	ssc-mir-16-1,oar-mir-16b,eca-mir-16-1,cfa-mir-16-2,hsa-mir-16-2,ptr-mir-16-2,ppy-mir-16-2,mml-mir-16-2,mmu-mir-16-2,rno-mir-16,mdo-mir-16-2,oan-mir-16b,oan-mir-16c,	hsa-mir-16-2	gttccactcTAGCAGCACGTAAATATTGGCGtagtgaaatatatattaaacaCCAATATTACTGTGCTGCTTTAgtgtgac	hsa-miR-16-2-3p	CCAATATTACTGTGCTGCTTTA	3'	Diff	gp3	..((((..(((((((((..((((((((.((((((.......))))..)).))))))))..)))))))))..))))..	73	36.4	-30.6	773.504	855.301	724.849	645.419	721.906	790.068	552.831	560.663	827.756	436.649	702.825	1275.56	middle
5	7	bta-miR-16b_R+4	TAGCAGCACGTAAATATTGGCGTAT	25					catacttgttccgctgTAGCAGCACGTAAATATTGGCgtagtaaaataaatattaaacaccaatattattgtgctgctttagcgtgacaggga	12	bta-mir-16b,bta-mir-195,eca-mir-195,cfa-mir-195,hsa-mir-195,ptr-mir-195,ggo-mir-195,mml-mir-195,cgr-mir-195,mmu-mir-195a,rno-mir-195,mdo-mir-195,	bta-mir-16b	catacttgttccgctgTAGCAGCACGTAAATATTGGCgtagtaaaataaatattaaacaccaatattattgtgctgctttagcgtgacaggga	bta-miR-16b	TAGCAGCACGTAAATATTGGC	5'	Diff	gp3	....(((((..((((..(((((((((..((((((((.((((((.......))))..)).))))))))..)))))))))..))))..)))))..	87	37.6	-38.5	74.3753	69.5636	47.4634	53.7849	51.6525	70.1999	76.2791	80.8131	89.2763	68.9713	65.7541	81.6709	middle
6	8	cgr-miR-18a-5p_R-1_1ss22AT	TAAGGTGCATCTAGTGCAGATT	22					gtgctgagtgctttttgttcTAAGGTGCATCTAGTGCAGATAGtgaagtagactagcatctACTGCCCTAAGTGCTCCTTCTGGcataagaagttatgtcgtc	9	cgr-mir-18a,ssc-mir-18a,bta-mir-18a,bta-mir-18b,eca-mir-18a,mmu-mir-18a,mdo-mir-18a,mdo-mir-18b,oan-mir-18,	cgr-mir-18a	gtgctgagtgctttttgttcTAAGGTGCATCTAGTGCAGATAGtgaagtagactagcatctACTGCCCTAAGTGCTCCTTCTGGcataagaagttatgtcgtc	cgr-miR-18a-5p	TAAGGTGCATCTAGTGCAGATAG	5'	Diff	gp3	....(((..(((((((((.((((((.(((..(((.((((.(((((.((....))..)).))))))).)))..))).)))..))).)))))))))....)))..	97	44.7	-29.1	229.251	198.753	220.808	338.324	224.648	227.192	201.87	275.124	266.962	290.085	387.701	390.394	middle
6	9	cgr-miR-18a-3p_R-1	ACTGCCCTAAGTGCTCCTTCTG	22					gtgctgagtgctttttgttcTAAGGTGCATCTAGTGCAGATAGtgaagtagactagcatctACTGCCCTAAGTGCTCCTTCTGGcataagaagttatgtcgtc	9	cgr-mir-18a,ssc-mir-18a,bta-mir-18a,bta-mir-18b,eca-mir-18a,mmu-mir-18a,mdo-mir-18a,mdo-mir-18b,oan-mir-18,	cgr-mir-18a	gtgctgagtgctttttgttcTAAGGTGCATCTAGTGCAGATAGtgaagtagactagcatctACTGCCCTAAGTGCTCCTTCTGGcataagaagttatgtcgtc	cgr-miR-18a-3p	ACTGCCCTAAGTGCTCCTTCTGG	3'	Diff	gp3	....(((..(((((((((.((((((.(((..(((.((((.(((((.((....))..)).))))))).)))..))).)))..))).)))))))))....)))..	97	44.7	-29.1	169.751	120.577	135.168	185.645	109.044	108.491	113.263	143.668	134.348	130.843	115.38	155.209	middle
7	10	mmu-miR-19a-5p_L-1R-1	AGTTTTGCATAGTTGCACTA	20					gcagtcttctgttagttttgcatagttgcactacaagaagaatgtagtTGTGCAAATCTATGCAAAACTGAtggtggcctgc	28	eca-mir-19a,ssc-mir-19a,ssc-mir-19b-1,bta-mir-19b,eca-mir-19b,cfa-mir-19a,cfa-mir-19b-1,mne-mir-19a,age-mir-19a,lca-mir-19b-2,lca-mir-19b-1,cgr-mir-19a,cgr-mir-19b,mmu-mir-19a,mmu-mir-19b-1,rno-mir-19a,mdo-mir-19a,mdo-mir-19b-1,sha-mir-19b,oan-mir-19a,oan-mir-19b-1,oan-mir-19b-2,	mmu-mir-19a	gcagccctctgtTAGTTTTGCATAGTTGCACTACaagaagaatgtagtTGTGCAAATCTATGCAAAACTGAtggtggcctgc	mmu-miR-19a-5p	TAGTTTTGCATAGTTGCACTAC	5'	Diff	gp3	((((.(..(..((((((((((((((((((((((((.......))))...))))))..))))))))))))))..)..).))))	82	41.5	-36.4	45.5002	78.1762	52.6225	65.9299	71.3297	68.9236	38.5248	48.1287	49.4053	39.557	55.829	65.0656	middle
7	11	eca-miR-19a	TGTGCAAATCTATGCAAAACTGA	23					gcagtcttctgttagttttgcatagttgcactacaagaagaatgtagtTGTGCAAATCTATGCAAAACTGAtggtggcctgc	28	eca-mir-19a,ssc-mir-19a,ssc-mir-19b-1,bta-mir-19b,eca-mir-19b,cfa-mir-19a,cfa-mir-19b-1,mne-mir-19a,age-mir-19a,lca-mir-19b-2,lca-mir-19b-1,cgr-mir-19a,cgr-mir-19b,mmu-mir-19a,mmu-mir-19b-1,rno-mir-19a,mdo-mir-19a,mdo-mir-19b-1,sha-mir-19b,oan-mir-19a,oan-mir-19b-1,oan-mir-19b-2,	eca-mir-19a	gcagtcttctgttagttttgcatagttgcactacaagaagaatgtagtTGTGCAAATCTATGCAAAACTGAtggtggcctgc	eca-miR-19a	TGTGCAAATCTATGCAAAACTGA	3'	Yes	gp3	((((.(..(..((((((((((((((((((((((((.......))))...))))))..))))))))))))))..)..).))))	82	41.5	-36.4	16667.1	10237.1	6244.53	13753.3	7690.49	8875.82	6243.33	4405.57	5380.85	5715.49	4275.88	8796.06	high
8	12	ssc-miR-22-5p	AGTTCTTCAGTGGCAAGCTTTA	22					cctctcacgccctcacctggctgagccgcagtagttcttcagtggcaagctttatgtcctgacccagctaAAGCTGCCAGTTGAAGAACTGttgccctctgcccctggctt	11	ggo-mir-22,ssc-mir-22,bta-mir-22,aja-mir-22,cfa-mir-22,sla-mir-22,cgr-mir-22,mmu-mir-3966,rno-mir-22,mdo-mir-22,oan-mir-22,	ssc-mir-22	gagccgcagtAGTTCTTCAGTGGCAAGCTTTAtgtcctgacccagctaAAGCTGCCAGTTGAAGAACTGTtgccctctgc	ssc-miR-22-5p	AGTTCTTCAGTGGCAAGCTTTA	5'	Yes	gp3	........(((.......(((.(((..(((..(((((((((((((((.((((((.((.........))))))))))))).))))))))))..))).))).)))...)))..	101	56.8	-43.3	309.751	352.456	487.016	517.029	532.103	432.687	458.445	460.455	417.778	463.527	556.429	574.746	middle
8	13	ggo-miR-22_R+1	AAGCTGCCAGTTGAAGAACTGT	22					cctctcacgccctcacctggctgagccgcagtagttcttcagtggcaagctttatgtcctgacccagctaAAGCTGCCAGTTGAAGAACTGttgccctctgcccctggctt	11	ggo-mir-22,ssc-mir-22,bta-mir-22,aja-mir-22,cfa-mir-22,sla-mir-22,cgr-mir-22,mmu-mir-3966,rno-mir-22,mdo-mir-22,oan-mir-22,	ggo-mir-22	cctctcacgccctcacctggctgagccgcagtagttcttcagtggcaagctttatgtcctgacccagctaAAGCTGCCAGTTGAAGAACTGttgccctctgcccctggctt	ggo-miR-22	AAGCTGCCAGTTGAAGAACTG	3'	Diff	gp3	........(((.......(((.(((..(((..(((((((((((((((.((((((.((.........))))))))))))).))))))))))..))).))).)))...)))..	101	56.8	-43.3	170311	186592	161493	200293	198559	127459	133371	254864	173271	192364	196321	103924	high
9	14	hsa-miR-23a-5p	GGGGTTCCTGGGGATGGGATTT	22					cggctggggttcctggggatgggatttgctgcctgtcacaaATCACATTGCCAGGGATTTCCaatcgacc	27	ssc-mir-23a,ssc-mir-23b,bta-mir-23a,bta-mir-23b,eca-mir-23a,eca-mir-23b,cfa-mir-23b,cfa-mir-23a,hsa-mir-23a,hsa-mir-23b,hsa-mir-23c,ptr-mir-23c,ggo-mir-23b,age-mir-23a,lca-mir-23a,cgr-mir-23a,cgr-mir-23b,mmu-mir-23a,mmu-mir-23b,rno-mir-23a,rno-mir-23b,mdo-mir-23a,mdo-mir-23b,sha-mir-23a,sha-mir-23b,oan-mir-23a,oan-mir-23b,	hsa-mir-23a	ggccggctGGGGTTCCTGGGGATGGGATTTgcttcctgtcacaaATCACATTGCCAGGGATTTCCaaccgacc	hsa-miR-23a-5p	GGGGTTCCTGGGGATGGGATTT	5'	Yes	gp3	((..((..((((((((..(((.((((((.((.....)))))))).)))..))))))))..).)..))...	67	55.7	-26.7	3.50002	9.27515	7.22269	5.20499	13.938	10.2109	12.3279	15.8035	6.06732	17.2428	13.0268	8.1332	middle
9	15	ssc-miR-23a	ATCACATTGCCAGGGATTTCC	21					cggctggggttcctggggatgggatttgctgcctgtcacaaATCACATTGCCAGGGATTTCCaatcgacc	27	ssc-mir-23a,ssc-mir-23b,bta-mir-23a,bta-mir-23b,eca-mir-23a,eca-mir-23b,cfa-mir-23b,cfa-mir-23a,hsa-mir-23a,hsa-mir-23b,hsa-mir-23c,ptr-mir-23c,ggo-mir-23b,age-mir-23a,lca-mir-23a,cgr-mir-23a,cgr-mir-23b,mmu-mir-23a,mmu-mir-23b,rno-mir-23a,rno-mir-23b,mdo-mir-23a,mdo-mir-23b,sha-mir-23a,sha-mir-23b,oan-mir-23a,oan-mir-23b,	ssc-mir-23a	cggctggggttcctggggatgggatttgctgcctgtcacaaATCACATTGCCAGGGATTTCCaatcgacc	ssc-miR-23a	ATCACATTGCCAGGGATTTCC	3'	Yes	gp3	((..((..((((((((..(((.((((((.((.....)))))))).)))..))))))))..).)..))...	67	55.7	-26.7	28017.6	26398.4	28214.9	34797.1	30124.1	37245.5	30997.8	30136.5	24771.1	35348.8	35099.7	34824.3	high
10	16	cgr-miR-25-5p	AGGCGGAGACTTGGGCAATTGCT	23					cgggactggccagtgttgagAGGCGGAGACTTGGGCAATTGCTggaagctgccctgggCATTGCACTTGTCTCGGTCTGAcagtgccggcccaacactg	9	cgr-mir-25,bta-mir-25,eca-mir-25,cfa-mir-25,ptr-mir-25,rno-mir-25,mdo-mir-25,sha-mir-25,	cgr-mir-25	cgggactggccagtgttgagAGGCGGAGACTTGGGCAATTGCTggaagctgccctgggCATTGCACTTGTCTCGGTCTGAcagtgccggcccaacactg	cgr-miR-25-5p	AGGCGGAGACTTGGGCAATTGCT	5'	Yes	gp3	.(((.((((.((.((((...((((.(((((..(((((((.(((((.......))..)))))))).)).))))).)))))))).))))))))).......	91	61.6	-41.3	124.251	74.2012	135.168	72.8699	117.243	108.491	113.263	209.037	232.292	149.1	102.973	96.2429	middle
10	17	cgr-miR-25-3p	CATTGCACTTGTCTCGGTCTGA	22					cgggactggccagtgttgagAGGCGGAGACTTGGGCAATTGCTggaagctgccctgggCATTGCACTTGTCTCGGTCTGAcagtgccggcccaacactg	9	cgr-mir-25,bta-mir-25,eca-mir-25,cfa-mir-25,ptr-mir-25,rno-mir-25,mdo-mir-25,sha-mir-25,	cgr-mir-25	cgggactggccagtgttgagAGGCGGAGACTTGGGCAATTGCTggaagctgccctgggCATTGCACTTGTCTCGGTCTGAcagtgccggcccaacactg	cgr-miR-25-3p	CATTGCACTTGTCTCGGTCTGA	3'	Yes	gp3	.(((.((((.((.((((...((((.(((((..(((((((.(((((.......))..)))))))).)).))))).)))))))).))))))))).......	91	61.6	-41.3	68077.1	72243.5	54371.4	55585.8	60788.5	60809.7	47446.4	52394.2	48971.5	42014.6	42927.8	63753.8	high
11	18	mdo-miR-26-5p_L+4R+1	GTGGTTCAAGTAATCCAGGATAGGCT	26					acctggTTCAAGTAATCCAGGATAGGCtggacccattctcatcggCCTATTCTCGACTACTTGCACTcgg	17	mdo-mir-26-3,bta-mir-26a-1,eca-mir-26a-2,cfa-mir-26a-1,hsa-mir-26a-1,mne-mir-26a,mmu-mir-26a-1,rno-mir-26a,mdo-mir-26-2,oan-mir-26-1,	mdo-mir-26-2	ccgtTTCAAGTAATCCAGGATAGGCtgttttctcttcagCCTGTTCTCCATTACTTGGTTCgggggcc	mdo-miR-26-5p	TTCAAGTAATCCAGGATAGGC	5'	Diff	gp3	.((..((.((((((.((.((((((((((((...........)))))))))))).)).)))))).))..))	69	51.4	-27.8	77.0004	55.6509	40.2407	29.495	37.7146	38.2909	45.4593	58.1854	67.6073	60.857	35.3584	53.5436	middle
12	19	cgr-miR-27a-3p_R+1_1ss21CT	TTCACAGTGGCTAAGTTCCGTT	22					cctgaggagcAGGGCTTAGCTGCTTGTGAGCAaggtccgcagcaagtcgtgTTCACAGTGGCTAAGTTCCGCtcccccggg	27	cgr-mir-27a,ssc-mir-27a,ssc-mir-27b,bta-mir-27a,bta-mir-27b,oar-mir-27a,eca-mir-27a,eca-mir-27b,cfa-mir-27b,cfa-mir-27a,hsa-mir-27a,hsa-mir-27b,ptr-mir-27b,ppy-mir-27a,ggo-mir-27b,mne-mir-27a,age-mir-27a,lca-mir-27a,cgr-mir-27b,mmu-mir-27a,mmu-mir-27b,rno-mir-27a,mdo-mir-27a,mdo-mir-27b,sha-mir-27b,oan-mir-27a,oan-mir-27b,	cgr-mir-27a	cctgaggagcAGGGCTTAGCTGCTTGTGAGCAaggtccgcagcaagtcgtgTTCACAGTGGCTAAGTTCCGCtcccccggg	cgr-miR-27a-3p	TTCACAGTGGCTAAGTTCCGC	3'	Diff	gp3	((((.(((((.(..((((((..(.((((((((..((.....))......)))))))))..))))))..).)))))..))))	81	61.7	-41.2	1557.51	1314.42	1373.34	1599.67	2103	2414.88	1602.63	1863.37	1338.28	1636.04	2025.35	1727.63	middle
13	20	mne-miR-28	AAGGAGCTCACAGTCTATTGAG	22					ggtccttgccctcAAGGAGCTCACAGTCTATTGAGtttcctttctgactttcccactagattgtgagctcctggagggcaggcact	13	mne-mir-28,ssc-mir-28,bta-mir-28,eca-mir-28,hsa-mir-28,ppy-mir-28,mml-mir-28,sla-mir-28,cgr-mir-28,mmu-mir-28a,mmu-mir-28c,mmu-mir-28b,rno-mir-28,	mne-mir-28	ggtccttgccctcAAGGAGCTCACAGTCTATTGAGtttcctttctgactttcccactagattgtgagctcctggagggcaggcact	mne-miR-28	AAGGAGCTCACAGTCTATTGAG	5'	Yes	gp3	(((.(((((((((.((((((((((((((((.((((((........))))....)).)))))))))))))))).))))))))).)))	86	52.3	-50	2950.95	2293.61	4048.06	4614.23	3120.47	2051.11	2125.41	2327.06	2244.55	2714.22	2175	2543.15	middle
13	21	ssc-miR-28-3p	CACTAGATTGTGAGCTCCTGGA	22					ggtccttgccctcAAGGAGCTCACAGTCTATTGAGtttcctttctgactttcccactagattgtgagctcctggagggcaggcact	13	mne-mir-28,ssc-mir-28,bta-mir-28,eca-mir-28,hsa-mir-28,ppy-mir-28,mml-mir-28,sla-mir-28,cgr-mir-28,mmu-mir-28a,mmu-mir-28c,mmu-mir-28b,rno-mir-28,	ssc-mir-28	ggtccttgccctcAAGGAGCTCACAGTCTATTGAGttgcctttctgtcttcccCACTAGATTGTGAGCTCCTGGAgggcaggcact	ssc-miR-28-3p	CACTAGATTGTGAGCTCCTGGA	3'	Yes	gp3	(((.(((((((((.((((((((((((((((.((((((........))))....)).)))))))))))))))).))))))))).)))	86	52.3	-50	6293.03	8036.91	13169	9663.94	11360.7	4639.58	7726.54	8473.52	7319.79	9451.6	5427.51	5612.25	high
15	24	oan-miR-29a-3p_R+3	TAGCACCATTTGAAATCGGTTAAA	24					tcaaaggctcctgtgacccctctagaggatgACTGATTTCTTTTGGTGTTCAGagtcaatatcattttcTAGCACCATTTGAAATCGGTTataatgattggggaatagcgccacgtga	19	oan-mir-29a-1,ssc-mir-29c,ssc-mir-29a,bta-mir-29d,bta-mir-29a,eca-mir-29c-2,eca-mir-29a,cfa-mir-29a,cfa-mir-29c-1,ptr-mir-29c,ggo-mir-29c,cgr-mir-29c,cgr-mir-29a,mmu-mir-29a,mdo-mir-29a-1,mdo-mir-29a-2,oan-mir-29a-2,	oan-mir-29a-2	caggacccatctcttacacaggcTGACCGATTTCTCTTGGTGTTcagagtctcagttcttgtcTAGCACCATTTGAAATCGGTTatgatgtagggggaaaagcagcagtcctg	oan-miR-29a-3p	TAGCACCATTTGAAATCGGTT	3'	Diff	gp3	(((..(((..((((..((((........((((((((((((...(((((((.((((...........)))))))))))...)))))))))))).......)))).)))).)))...)))	64	42.4	-42.5	108.5	93.414	62.9406	47.7124	86.0876	75.9436	112.492	120.322	131.748	120.7	88.0857	106.748	middle
16	25	mmu-miR-30d-3p_L-1R+2	TTTCAGTCAGATGTTTGCTGCTT	23					aagtctgtgtcTGTAAACATCCCCGACTGGAAGctgtaagccacagccaagCTTTCAGTCAGATGTTTGCTGCtactggctc	29	mmu-mir-30d,ssc-mir-30d,ssc-mir-30a,ssc-mir-30e,bta-mir-30d,bta-mir-30e,bta-mir-30a,eca-mir-30d,eca-mir-30e,cfa-mir-30d,cfa-mir-30a,hsa-mir-30d,hsa-mir-30a,ptr-mir-30e,ggo-mir-30e,mml-mir-30d,mml-mir-30e,mml-mir-30a,cgr-mir-30e,cgr-mir-30a,mmu-mir-30e,mmu-mir-30a,rno-mir-30a,mdo-mir-30d,mdo-mir-30a,sha-mir-30e,oan-mir-30d,oan-mir-30e,oan-mir-30a,	mmu-mir-30d	aagtctgtgtcTGTAAACATCCCCGACTGGAAGctgtaagccacagccaagCTTTCAGTCAGATGTTTGCTGCtactggctc	mmu-miR-30d-3p	CTTTCAGTCAGATGTTTGCTGC	3'	Diff	gp3	.((((.(((...(((((((((...(((((((((((....((....))..))))))))))).)))))))))...))).)))).	80	50	-33.8	15.7501	13.9127	13.9295	9.54249	14.3479	12.1254	21.5739	24.0643	22.5358	32.9642	19.23	10.8443	middle
18	26	bta-miR-33b_R-1	GTGCATTGCTGTTGCATTG	19					gcgggcggccccgcgGTGCATTGCTGTTGCATTGCatgtgtgaggcaggtgcagtgcctcggcagtgcagcccggagccggcccctggcaccgc	6	bta-mir-33b,eca-mir-33b,cfa-mir-33b,hsa-mir-33b,ptr-mir-33b,mml-mir-33b,	bta-mir-33b	gcgggcggccccgcgGTGCATTGCTGTTGCATTGCatgtgtgaggcaggtgcagtgcctcggcagtgcagcccggagccggcccctggcaccgc	bta-miR-33b	GTGCATTGCTGTTGCATTGC	5'	Diff	gp3	((((.((((.(((.((((((((((((..((((((((..((.....))..))))))))..)))))))))).))))).))))(((...))).))))	94	72.3	-55.7	203.001	197.428	174.376	213.405	188.573	238.68	106.328	112.779	106.612	51.7284	81.2622	154.531	middle
18	27	hsa-miR-33b-3p_R-1	CAGTGCCTCGGCAGTGCAGCC	21					gcgggcggccccgcgGTGCATTGCTGTTGCATTGCatgtgtgaggcaggtgcagtgcctcggcagtgcagcccggagccggcccctggcaccgc	6	bta-mir-33b,eca-mir-33b,cfa-mir-33b,hsa-mir-33b,ptr-mir-33b,mml-mir-33b,	hsa-mir-33b	gcgggcggccccgcgGTGCATTGCTGTTGCATTGCacgtgtgtgaggcgggtgCAGTGCCTCGGCAGTGCAGCCCggagccggcccctggcaccac	hsa-miR-33b-3p	CAGTGCCTCGGCAGTGCAGCCC	3'	Diff	gp3	((((.((((.(((.((((((((((((..((((((((..((.....))..))))))))..)))))))))).))))).))))(((...))).))))	94	72.3	-55.7	2.62501	9.93766	1.03181	1.735	4.09941	3.82909	2.69674	1.43668	2.60028	1.52142	1.55081	2.37218	low
19	28	hsa-miR-33a-3p_R-1_1ss3AG	CAGTGTTTCCACAGTGCATCA	21					ctgcgGTGCATTGTAGTTGCATTGCAtgttctggcggtacccgtgcaatgtttccacagtgcatcacag	11	bta-mir-33a,eca-mir-33a,cfa-mir-33a,hsa-mir-33a,ppy-mir-33a,mml-mir-33a,mmu-mir-33,rno-mir-33,mdo-mir-33,oan-mir-33b,	hsa-mir-33a	ctgtgGTGCATTGTAGTTGCATTGCAtgttctggtggtacccatgCAATGTTTCCACAGTGCATCACag	hsa-miR-33a-3p	CAATGTTTCCACAGTGCATCAC	3'	Diff	gp3	(((.((((((((((....((((((((((....((.....))))))))))))....)))))))))).)))	69	52.2	-30.6	8.75004	11.9252	21.6681	10.41	9.0187	26.8036	19.2624	21.5502	20.8022	9.12855	19.23	39.9883	middle
20	29	mdo-miR-34b-5p_R+1_1ss23TA	AGGCAGTGTAGTTAGCTGATTGAA	24					AGGCAGTGTAGTTAGCTGATTGTattctactgcctacAATCACTAACTCCACTGCCATC	18	mdo-mir-34b,ssc-mir-34c-2,ssc-mir-34c-1,bta-mir-34c,bta-mir-34b,eca-mir-34b,cfa-mir-34c,cfa-mir-34b,hsa-mir-34c,ggo-mir-34c,mml-mir-34c,cgr-mir-34b,cgr-mir-34c,mmu-mir-34b,mmu-mir-34c,mdo-mir-34c,oan-mir-34b,oan-mir-34a,	mdo-mir-34b	AGGCAGTGTAGTTAGCTGATTGTattctactgcctacAATCACTAACTCCACTGCCATC	mdo-miR-34b-5p	AGGCAGTGTAGTTAGCTGATTGT	5'	Diff	gp3	.(((((((.((((((.((((((((..........)))))))))))))).)))))))...	55	44.1	-28.7	5.25002	3.97506	0.515907	1.735	1.63976	0	0.770496	0.718339	2.60028	4.05713	0	2.0333	low
21	30	ssc-miR-34a	TGGCAGTGTCTTAGCTGGTTGT	22					tttcttTGGCAGTGTCTTAGCTGGTTGTtgtgagtaatagcaaaggaagcaatcagcagcatcctgccctagaaca	14	ssc-mir-34a,bta-mir-34a,eca-mir-34a,cfa-mir-34a,hsa-mir-34a,ppa-mir-34a,mml-mir-34a,age-mir-34a,lla-mir-34a,sla-mir-34a,cgr-mir-34a,mmu-mir-34a,rno-mir-34a,mdo-mir-34a,	ssc-mir-34a	tttcttTGGCAGTGTCTTAGCTGGTTGTtgtgagtaatagcaaaggaagcaatcagcagcatcctgccctagaaca	ssc-miR-34a	TGGCAGTGTCTTAGCTGGTTGT	5'	Yes	gp3	.((((..(((((..(((..((((((((((..................)))))))))))).)..)))))..))))..	73	44.7	-24.1	2205.01	1882.85	2097.68	2080.26	2001.33	1520.15	1973.24	2189.5	1511.63	1836.87	2138.87	1433.48	middle
22	31	cgr-miR-34c-5p_R+2	AGGCAGTGTAGTTAGCTGATTGCCA	25					ctagttactAGGCAGTGTAGTTAGCTGATTGCtaatagtaccAATCACTAACCACACGGCCAGGtaaaaagact	7	cgr-mir-34c,hsa-mir-34c,ptr-mir-34c,mml-mir-34c,mmu-mir-34c,mdo-mir-34c,oan-mir-34a,	cgr-mir-34c	ctagttactAGGCAGTGTAGTTAGCTGATTGCtaatagtaccAATCACTAACCACACGGCCAGGtaaaaagact	cgr-miR-34c-5p	AGGCAGTGTAGTTAGCTGATTGC	5'	Diff	gp3	((..((((..(((.((((.(((((.((((((.((....)).))))))))))).)))).)))..))))..))...	71	41.9	-26.6	3.50002	1.32502	0.515907	0	0	0	0	0.718339	0	0	0	0	low
23	32	mmu-miR-92a-3p_R+2	TATTGCACTTGTCCCGGCCTGAA	23					tgcccattcatccacAGGTGGGGATTGGTGGCATTACttgtgttagatataaagTATTGCACTTGTCCCGGCCTGaggaagaaagagggtt	19	mmu-mir-92a-2,ssc-mir-92a-1,bta-mir-92a-1,ptr-mir-92-2,cgr-mir-92a,mmu-mir-92a-1,rno-mir-92a-2,rno-mir-92a-1,mdo-mir-92a-2,mdo-mir-92a-1,sha-mir-92a,oan-mir-92a-1,oan-mir-92a-2,oan-mir-92b,oan-mir-92d,oan-mir-92c,	mmu-mir-92a-1	ctttctacacAGGTTGGGATTTGTCGCAATGCTgtgtttctctgtatggTATTGCACTTGTCCCGGCCTGttgagtttgg	mmu-miR-92a-3p	TATTGCACTTGTCCCGGCCTG	3'	Diff	gp3	.((((.(((.(((.((((..(((((..((.(((.(((((((((...)))))).))).)))))..)))))..)))).))).)))...)))).	89	47.3	-37.9	463.752	429.969	335.339	343.529	325.493	252.72	335.166	536.599	700.776	508.156	389.252	672.006	middle
24	33	bta-miR-92b	TATTGCACTCGTCCCGGCCTCC	22					cgggccccgggcgggcgggagggacgggacgcggtgcagtgttgttctttcccctgccaaTATTGCACTCGTCCCGGCCTCCggccccctcggccc	13	bta-mir-92b,ssc-mir-92b,eca-mir-92b,cfa-mir-92b,hsa-mir-92b,ptr-mir-92b,ppy-mir-92b,ggo-mir-92b,mml-mir-92b,cgr-mir-92b,mmu-mir-92b,rno-mir-92b,mdo-mir-92b,	bta-mir-92b	cgggccccgggcgggcgggagggacgggacgcggtgcagtgttgttctttcccctgccaaTATTGCACTCGTCCCGGCCTCCggccccctcggccc	bta-miR-92b	TATTGCACTCGTCCCGGCCTCC	3'	Yes	gp3	.(((((..(((.((((.(((((..(((((((.((((((((((((.............))))))))))))))))))).))))).))))))).)))))	95	74	-64.1	5031.27	5924.17	4937.23	4021.72	6832.07	5310.94	7842.88	7094.31	7921.32	8208.59	6746.62	6242.91	high
25	34	hsa-miR-93-5p_R-2	CAAAGTGCTGTTCGTGCAGGT	21					ctgggggctcCAAAGTGCTGTTCGTGCAGGTAGtgtgattacccaacctACTGCTGAGCTAGCACTTCCCGagcccccgg	13	hsa-mir-93,bta-mir-93,eca-mir-93,cfa-mir-93,ppa-mir-93,mml-mir-93,age-mir-93,lla-mir-93,cgr-mir-93,mmu-mir-93,rno-mir-93,mdo-mir-93,sha-mir-93,	hsa-mir-93	ctgggggctcCAAAGTGCTGTTCGTGCAGGTAGtgtgattacccaacctACTGCTGAGCTAGCACTTCCCGagcccccgg	hsa-miR-93-5p	CAAAGTGCTGTTCGTGCAGGTAG	5'	Diff	gp3	((((((((((..((((((((((((.((((.(((..((......))..)))))))))))).)))))))...))))))))))	80	60	-44.8	49954	51500.9	49601.3	43926.7	48379.6	41520.1	47958	55374.6	66201.4	56570.6	46488.2	59287	high
25	35	hsa-miR-93-3p_R+1	ACTGCTGAGCTAGCACTTCCCGA	23					ctgggggctcCAAAGTGCTGTTCGTGCAGGTAGtgtgattacccaacctACTGCTGAGCTAGCACTTCCCGagcccccgg	13	hsa-mir-93,bta-mir-93,eca-mir-93,cfa-mir-93,ppa-mir-93,mml-mir-93,age-mir-93,lla-mir-93,cgr-mir-93,mmu-mir-93,rno-mir-93,mdo-mir-93,sha-mir-93,	hsa-mir-93	ctgggggctcCAAAGTGCTGTTCGTGCAGGTAGtgtgattacccaacctACTGCTGAGCTAGCACTTCCCGagcccccgg	hsa-miR-93-3p	ACTGCTGAGCTAGCACTTCCCG	3'	Diff	gp3	((((((((((..((((((((((((.((((.(((..((......))..)))))))))))).)))))))...))))))))))	80	60	-44.8	124.251	148.402	134.136	173.5	139.38	126.36	94.0005	102.004	98.8107	83.1712	101.733	171.475	middle
26	36	bta-miR-95	TTCAACGGGTATTTATTGAGCA	22					aacacagcgggcgctcaataaatgtttgttgaattgagatgcgctaaaTTCAACGGGTATTTATTGAGCAcccactctgtg	6	bta-mir-95,ssc-mir-95,eca-mir-95,cfa-mir-95,hsa-mir-95,ppa-mir-95,	bta-mir-95	aacacagcgggcgctcaataaatgtttgttgaattgagatgcgctaaaTTCAACGGGTATTTATTGAGCAcccactctgtg	bta-miR-95	TTCAACGGGTATTTATTGAGCA	3'	Yes	gp3	..(((((.(((.((((((((((((..(((((((((.((.....)).)))))))))..)))))))))))).)))...)))))	79	43.2	-39.6	3.50002	2.65004	1.03181	8.67499	3.27953	5.10545	8.47546	5.74671	8.6676	5.07142	7.44387	10.1665	middle
27	37	ssc-miR-96-5p	TTTGGCACTAGCACATTTTTGCT	23					ctgggccgatTTTGGCACTAGCACATTTTTGCTtgtgtctctccgctctgagcaattatgtgcagtgccaatatgggaaagcagg	9	ssc-mir-96,bta-mir-96,eca-mir-96,cfa-mir-96,sla-mir-96,mmu-mir-96,rno-mir-96,mdo-mir-96,oan-mir-96,	ssc-mir-96	ctgggccgatTTTGGCACTAGCACATTTTTGCTtgtgtctctccgctctgagcaattatgtgcagtgccaatatgggaaagcagg	ssc-miR-96-5p	TTTGGCACTAGCACATTTTTGCT	5'	Yes	gp3	(((..((.((.((((((((.((((((..(((((((((......)))...))))))..)))))))))))))).)).))....))).	84	49.4	-37.6	1.75001	6.6251	9.28632	5.20499	5.73917	0	7.70496	3.59169	7.80084	13.1857	4.34225	8.81097	middle
28	38	ptr-miR-99b	CACCCGTAGAACCGACCTTGCG	22					gcaccCACCCGTAGAACCGACCTTGCGgggccttcgccgcacacaagctcgtgtctgtgggtccgtgtc	3	ptr-mir-99b,ssc-mir-99b,cfa-mir-99b,	ptr-mir-99b	gcaccCACCCGTAGAACCGACCTTGCGgggccttcgccgcacacaagctcgtgtctgtgggtccgtgtc	ptr-miR-99b	CACCCGTAGAACCGACCTTGCG	5'	Yes	gp3	((((..((((..(((..(((.(((((((((...)).)))))....)).)))..)))..))))..)))).	68	66.7	-26.9	75.2503	113.952	59.8452	93.6899	82.808	94.4508	119.427	153.724	126.547	178.514	161.284	224.341	middle
29	39	oan-miR-103-3p_R+2	AGCAGCATTGTACAGGGCTATGAGT	25					cttgaactgtaaacatgtggaagattgctccttgcccTCGGCTTCTTTACAGTGCTGCCTTGttgcatatggatcaAGCAGCATTGTACAGGGCTATGAgggcattgagactttatcttcaaag	28	oan-mir-103-1,ssc-mir-103-2,ssc-mir-103-1,ssc-mir-107,bta-mir-103-1,bta-mir-103-2,bta-mir-107,oar-mir-103,eca-mir-107a,eca-mir-103,cfa-mir-103-2,cfa-mir-103-1,cfa-mir-107,hsa-mir-103a-1,hsa-mir-103a-2,ptr-mir-103-2,cgr-mir-103,cgr-mir-107,mmu-mir-103-2,mmu-mir-103-1,mmu-mir-107,rno-mir-107,mdo-mir-103-2,mdo-mir-103-1,mdo-mir-107,oan-mir-103-2,oan-mir-107,	oan-mir-103-2	gagctgcgccgtccttggtgctttcAGCTTCTTTACAGTGCTGCCTTGttgcattcatgtcaAGCAGCATTGTACAGGGCTATGAaagaaccaaggtttttgctt	oan-miR-103-3p	AGCAGCATTGTACAGGGCTATGA	3'	Diff	gp3	...................((((((..(((..((((((((((.(((.(((((((((((.(((............)))))))))))))).))))))..)))))))..))).....))))))....	101	45.2	-47.3	52.5002	47.7008	34.0498	41.6399	39.3543	25.5272	31.5903	45.9737	45.0715	45.6427	35.9787	28.4662	middle
30	40	hsa-miR-106b-5p	TAAAGTGCTGACAGTGCAGAT	21					cctgccggggcTAAAGTGCTGACAGTGCAGATagtggtcctctccgtgctaCCGCACTGTGGGTACTTGCTGCtccagcagg	9	hsa-mir-106b,bta-mir-106b,oar-mir-106b,eca-mir-106b,cfa-mir-106b,mml-mir-106b,lla-mir-106b,cgr-mir-106b,mmu-mir-106b,	hsa-mir-106b	cctgccggggcTAAAGTGCTGACAGTGCAGATagtggtcctctccgtgctaCCGCACTGTGGGTACTTGCTGCtccagcagg	hsa-miR-106b-5p	TAAAGTGCTGACAGTGCAGAT	5'	Yes	gp3	(((((.(((((..((((((..(((((((...((((((......))..))))..)))))))..))))))...))))).)))))	82	61	-41.7	19671.8	19806.4	17770.9	20981.3	21393.2	26206.3	13336.5	14430.7	16364.4	8854.69	17336.1	24495.2	high
30	41	hsa-miR-106b-3p_R-2	CCGCACTGTGGGTACTTGCT	20					cctgccggggcTAAAGTGCTGACAGTGCAGATagtggtcctctccgtgctaCCGCACTGTGGGTACTTGCTGCtccagcagg	9	hsa-mir-106b,bta-mir-106b,oar-mir-106b,eca-mir-106b,cfa-mir-106b,mml-mir-106b,lla-mir-106b,cgr-mir-106b,mmu-mir-106b,	hsa-mir-106b	cctgccggggcTAAAGTGCTGACAGTGCAGATagtggtcctctccgtgctaCCGCACTGTGGGTACTTGCTGCtccagcagg	hsa-miR-106b-3p	CCGCACTGTGGGTACTTGCTGC	3'	Diff	gp3	(((((.(((((..((((((..(((((((...((((((......))..))))..)))))))..))))))...))))).)))))	82	61	-41.7	1725.51	1787.45	2454.68	1943.2	2034.95	2061.33	1787.55	1877.74	1958.01	1613.72	1628.97	1493.12	middle
31	42	rno-miR-125b-5p_R+2	TCCCTGAGACCCTAACTTGTGAAA	24					accagacttttcctagTCCCTGAGACCCTAACTTGTGAggtattttagtaacatcACAAGTCAGGCTCTTGGGACCTaggcggagagg	31	rno-mir-125b-2,ssc-mir-125b-2,ssc-mir-125b-1,ssc-mir-125a,bta-mir-125b-1,bta-mir-125b-2,bta-mir-125a,eca-mir-125b-2,eca-mir-125b,eca-mir-125a,cfa-mir-125b-1,cfa-mir-125b-2,cfa-mir-125a,hsa-mir-125b-1,hsa-mir-125a,ppa-mir-125b,ggo-mir-125a,mml-mir-125a,cgr-mir-125b,cgr-mir-125a,mmu-mir-125b-1,mmu-mir-125b-2,mmu-mir-125a,rno-mir-125b-1,rno-mir-125a,mdo-mir-125b-2,mdo-mir-125b-1,sha-mir-125b,sha-mir…	rno-mir-125b-1	tgcgctcccctcagTCCCTGAGACCCTAACTTGTGAtgtttaccgtttaaatccACGGGTTAGGCTCTTGGGAGCTgcgagtcgtgc	rno-miR-125b-5p	TCCCTGAGACCCTAACTTGTGA	5'	Diff	gp3	.((...(((..(((((..((..(((.(((.((((((((..(((....)))...)))))))).))).)))..))..)))))..))).))	87	48.9	-37.3	64.7503	21.2003	89.7677	74.6049	64.7706	33.1854	73.1971	91.9474	68.4741	78.0998	73.8183	78.621	middle
31	43	rno-miR-125b-2-3p	ACAAGTCAGGCTCTTGGGACCT	22					accagacttttcctagTCCCTGAGACCCTAACTTGTGAggtattttagtaacatcACAAGTCAGGCTCTTGGGACCTaggcggagagg	31	rno-mir-125b-2,ssc-mir-125b-2,ssc-mir-125b-1,ssc-mir-125a,bta-mir-125b-1,bta-mir-125b-2,bta-mir-125a,eca-mir-125b-2,eca-mir-125b,eca-mir-125a,cfa-mir-125b-1,cfa-mir-125b-2,cfa-mir-125a,hsa-mir-125b-1,hsa-mir-125a,ppa-mir-125b,ggo-mir-125a,mml-mir-125a,cgr-mir-125b,cgr-mir-125a,mmu-mir-125b-1,mmu-mir-125b-2,mmu-mir-125a,rno-mir-125b-1,rno-mir-125a,mdo-mir-125b-2,mdo-mir-125b-1,sha-mir-125b,sha-mir…	rno-mir-125b-2	accagacttttcctagTCCCTGAGACCCTAACTTGTGAggtattttagtaacatcACAAGTCAGGCTCTTGGGACCTaggcggagagg	rno-miR-125b-2-3p	ACAAGTCAGGCTCTTGGGACCT	3'	Yes	gp3	.((...(((..(((((..((..(((.(((.((((((((..(((....)))...)))))))).))).)))..))..)))))..))).))	87	48.9	-37.3	1190.01	1298.52	3127.43	1965.75	2071.84	1104.05	3357.05	4340.92	2677.42	5337.16	2725.08	2017.71	middle
32	44	oan-miR-126-3p_R+1_1ss22GC	TCGTACCGTGAGTAATAATGCCT	23					gaagcatcagtgacagctggcaactgccCATTATTACTTTTGGTACGCGctgtgacgcttcaaacTCGTACCGTGAGTAATAATGCGtggctggcagcactggcagcgcc	13	oan-mir-126,ssc-mir-126,bta-mir-126,eca-mir-126,hsa-mir-126,ptr-mir-126,ppy-mir-126,mml-mir-126,cgr-mir-126,mmu-mir-126a,rno-mir-126a,mdo-mir-126,sha-mir-126,	oan-mir-126	gaagcatcagtgacagctggcaactgccCATTATTACTTTTGGTACGCGctgtgacgcttcaaacTCGTACCGTGAGTAATAATGCGtggctggcagcactggcagcgcc	oan-miR-126-3p	TCGTACCGTGAGTAATAATGCG	3'	Diff	gp3	...((.(((((....((((.((.(..(.((((((((((..(((((((.....(((....)))....)))))))..)))))))))).)..).)).)))))))))..))...	104	53.6	-42.3	6.12503	0.66251	1.54772	3.46999	1.22982	0	3.46723	3.95086	2.60028	2.53571	3.41177	2.71107	low
34	45	cgr-miR-130b-3p_R+2	CAGTGCAATGATGAAAGGGCATTT	24					cttgctggacACTCTTTCCCTGTTGCACTACTgtgggccactggggagCAGTGCAATGATGAAAGGGCATctgtcaggc	26	cgr-mir-130b,ssc-mir-130b,ssc-mir-130a,bta-mir-130b,bta-mir-130a,eca-mir-130b,eca-mir-130a,cfa-mir-130b,cfa-mir-130a,hsa-mir-130b,hsa-mir-130a,ptr-mir-130b,ptr-mir-130a,ppy-mir-130b,ggo-mir-130b,mml-mir-130b,mml-mir-130a,cgr-mir-130a,mmu-mir-130b,mmu-mir-130a,rno-mir-130b,rno-mir-130a,mdo-mir-130c-1,mdo-mir-130c-2,sha-mir-130b,oan-mir-130b,	cgr-mir-130b	cttgctggacACTCTTTCCCTGTTGCACTACTgtgggccactggggagCAGTGCAATGATGAAAGGGCATctgtcaggc	cgr-miR-130b-3p	CAGTGCAATGATGAAAGGGCAT	3'	Diff	gp3	((((..(((..(((((((...((((((((...((...((....))..))))))))))...)))))))..)))..)))).	78	55.7	-24.1	35.0002	21.2003	13.4136	19.085	23.7766	19.1454	15.4099	8.62007	21.669	9.12855	20.4706	14.9109	middle
35	46	ggo-miR-142_L-2R-1_1ss10TC	CATAAAGCAGAAAGCACT	18					acagacagacagtgcagtcaCCCATAAAGTAGAAAGCACTActaacagcactggagggtgtagtgtttcctactttatggatgagtgtactgtgggcttcggagatcacgc	8	ggo-mir-142,ssc-mir-142,bta-mir-142,eca-mir-142,cfa-mir-142,cgr-mir-142,sha-mir-142,oan-mir-142,	ggo-mir-142	acagacagacagtgcagtcaCCCATAAAGTAGAAAGCACTActaacagcactggagggtgtagtgtttcctactttatggatgagtgtactgtgggcttcggagatcacgc	ggo-miR-142	CCCATAAAGTAGAAAGCACTA	5'	Diff	gp3	........((((((((.(((.(((((((((((.(((((((((...((....))......))))))))).))))))))))).))).))))))))..................	85	47.7	-44.4	13.1251	10.6002	9.80222	8.67499	9.0187	6.38181	5.00822	12.5709	9.53436	4.56427	8.58112	11.0702	middle
35	47	ssc-miR-142-3p_R+1_1ss16TN	TGTAGTGTTTCCTACNTTATGGT	23					acagacagacagtgcagtcaCCCATAAAGTAGAAAGCACTActaacagcactggagggtgtagtgtttcctactttatggatgagtgtactgtgggcttcggagatcacgc	8	ggo-mir-142,ssc-mir-142,bta-mir-142,eca-mir-142,cfa-mir-142,cgr-mir-142,sha-mir-142,oan-mir-142,	ssc-mir-142	gtgcagtcaccCATAAAGTAGAAAGCACTACTaacagcactggagggTGTAGTGTTTCCTACTTTATGGatgagtgtact	ssc-miR-142-3p	TGTAGTGTTTCCTACTTTATGG	3'	Diff	gp3	........((((((((.(((.(((((((((((.(((((((((...((....))......))))))))).))))))))))).))).))))))))..................	85	47.7	-44.4	19.2501	17.2253	8.2545	14.7475	22.1368	10.2109	12.3279	8.97923	12.568	14.2	13.0268	20.6719	middle
37	49	cgr-miR-143_R+2	TGAGATGAAGCACTGTAGCTCAT	23					ctgtctcccagcctgaggtgcagtgctgcatctctggtcagttgggagtcTGAGATGAAGCACTGTAGCTCaggaaggga	14	cgr-mir-143,ssc-mir-143,bta-mir-143,oar-mir-143,eca-mir-143,aja-mir-143,cfa-mir-143,hsa-mir-143,ppa-mir-143,mml-mir-143,mmu-mir-143,rno-mir-143,mdo-mir-143,oan-mir-143,	cgr-mir-143	ctgtctcccagcctgaggtgcagtgctgcatctctggtcagttgggagtcTGAGATGAAGCACTGTAGCTCaggaaggga	cgr-miR-143	TGAGATGAAGCACTGTAGCTC	3'	Diff	gp3	.....((((..((((((.(((((((((.((((((.((((......)).)).)))))).))))))))).))))))..))))	75	56.2	-44.8	1.75001	0	6.19088	3.46999	3.27953	1.27636	12.3279	6.46505	9.53436	6.0857	4.34225	0.677767	middle
38	50	hsa-miR-144-5p_R+1	GGATATCATCATATACTGTAAGT	23					tggggccctggctgGGATATCATCATATACTGTAAGtttgcgatgagacacTACAGTATAGATGATGTACTagtccgggcaccccc	14	hsa-mir-144,ssc-mir-144,bta-mir-144,eca-mir-144,aja-mir-144,cfa-mir-144,ppa-mir-144,ptr-mir-144,ppy-mir-144,mml-mir-144,mmu-mir-144,rno-mir-144,mdo-mir-144,oan-mir-144,	hsa-mir-144	tggggccctggctgGGATATCATCATATACTGTAAGtttgcgatgagacacTACAGTATAGATGATGTACTagtccgggcaccccc	hsa-miR-144-5p	GGATATCATCATATACTGTAAG	5'	Diff	gp3	.(((((((.((((((.((((((((.(((((((((.((((......))))..))))))))))))))))).)))))).)))).)))..	83	50	-44.4	3395.02	1681.45	3940.49	1934.52	2891.31	2529.11	1028.61	4327.63	5515.2	954.44	2741.82	4687.78	middle
38	51	hsa-miR-144-3p	TACAGTATAGATGATGTACT	20					tggggccctggctgGGATATCATCATATACTGTAAGtttgcgatgagacacTACAGTATAGATGATGTACTagtccgggcaccccc	14	hsa-mir-144,ssc-mir-144,bta-mir-144,eca-mir-144,aja-mir-144,cfa-mir-144,ppa-mir-144,ptr-mir-144,ppy-mir-144,mml-mir-144,mmu-mir-144,rno-mir-144,mdo-mir-144,oan-mir-144,	hsa-mir-144	tggggccctggctgGGATATCATCATATACTGTAAGtttgcgatgagacacTACAGTATAGATGATGTACTagtccgggcaccccc	hsa-miR-144-3p	TACAGTATAGATGATGTACT	3'	Yes	gp3	.(((((((.((((((.((((((((.(((((((((.((((......))))..))))))))))))))))).)))))).)))).)))..	83	50	-44.4	6359.53	4532.9	11660	9827.02	6136.4	7505.01	2627.39	6126.35	7566.82	1439.77	5523.04	22591.3	high
40	53	oan-miR-148-3p_R+1_1ss4GN	TCANTGCACTACAGAACTTTGTT	23					agtcttttgaggcAAAGTTCTGTGACACTCAGACTctgattatgatagaagTCAGTGCACTACAGAACTTTGTctccagaggct	29	oan-mir-148,ssc-mir-148a,ssc-mir-148b,ssc-mir-152,bta-mir-148b,oar-mir-152,eca-mir-148b,cfa-mir-148a,cfa-mir-148b,cfa-mir-152,hsa-mir-148a,hsa-mir-148b,hsa-mir-152,ptr-mir-148a,ptr-mir-148b,ptr-mir-152,ppy-mir-152,ggo-mir-148a,ggo-mir-148b,ggo-mir-152,cgr-mir-148b,cgr-mir-152,mmu-mir-148a,mmu-mir-148b,mmu-mir-152,rno-mir-148a,rno-mir-148b,rno-mir-152,mdo-mir-148,	oan-mir-148	agtcttttgaggcAAAGTTCTGTGACACTCAGACTctgattatgatagaagTCAGTGCACTACAGAACTTTGTctccagaggct	oan-miR-148-3p	TCAGTGCACTACAGAACTTTGT	3'	Diff	gp3	(((((((.((((((((((((((((.((((..(((((((.......))).))))))))...)))))))))))))))).)))))))	84	42.9	-37.9	1.75001	14.5752	9.28632	5.20499	7.37893	6.38181	9.24595	17.9585	12.1346	21.2999	6.20322	5.42214	middle
41	54	bta-miR-150_R+1	TCTCCCAACCCTTGTACCAGTGTT	24					cctctctcctcacggccctgTCTCCCAACCCTTGTACCAGTGTgtgtctcagaccctggtacaggtacggggaggcagggacctgggggatcccagcagc	14	bta-mir-150,ssc-mir-150-2,oar-mir-150,eca-mir-150,cfa-mir-150,hsa-mir-150,ptr-mir-150,ggo-mir-150,mmu-mir-150,rno-mir-150,mdo-mir-150,sha-mir-150,oan-mir-150,	bta-mir-150	cctctctcctcacggccctgTCTCCCAACCCTTGTACCAGTGTgtgtctcagaccctggtacaggtacggggaggcagggacctgggggatcccagcagc	bta-miR-150	TCTCCCAACCCTTGTACCAGTGT	5'	Diff	gp3	....((.(((((.(((((((((((((....((((((((((.((.((...)).)).))))))))))....))))))))))).)))))))))..........	86	64	-53.6	199.501	215.978	149.613	133.595	191.852	208.047	182.608	272.25	307.7	260.671	232	424.282	middle
42	55	ggo-miR-151a_R+1	TCGAGGAGCTCACAGTCTAGT	21					ggggcaaagatgactaaaacacttttcctgcccTCGAGGAGCTCACAGTCTAGtatgtctcatcccctactagactgaagctccttgaggacagggatggtcatactcacct	11	ggo-mir-151a,ssc-mir-151,bta-mir-151,eca-mir-151,cfa-mir-151,hsa-mir-151a,hsa-mir-151b,ppy-mir-151b,cgr-mir-151,mmu-mir-151,rno-mir-151,	ggo-mir-151a	ggggcaaagatgactaaaacacttttcctgcccTCGAGGAGCTCACAGTCTAGtatgtctcatcccctactagactgaagctccttgaggacagggatggtcatactcacct	ggo-miR-151a	TCGAGGAGCTCACAGTCTAG	5'	Diff	gp3	(((......(((((((........((((((.((((((((((((..((((((((((............)))))))))).)))))))))))).))))))))))))).....)))	112	50	-52.8	3828.58	3945.03	2913.93	3354.62	3354.55	3959.91	3502.93	3528.12	4899.15	2882.09	3759.31	4927.54	middle
42	56	ssc-miR-151-3p	CTAGACTGAAGCTCCTTGAGGA	22					ggggcaaagatgactaaaacacttttcctgcccTCGAGGAGCTCACAGTCTAGtatgtctcatcccctactagactgaagctccttgaggacagggatggtcatactcacct	11	ggo-mir-151a,ssc-mir-151,bta-mir-151,eca-mir-151,cfa-mir-151,hsa-mir-151a,hsa-mir-151b,ppy-mir-151b,cgr-mir-151,mmu-mir-151,rno-mir-151,	ssc-mir-151	ttttcctgcccTCGAGGAGCTCACAGTCTAGTacgtctcatcccctaCTAGACTGAAGCTCCTTGAGGAcagggatcgtc	ssc-miR-151-3p	CTAGACTGAAGCTCCTTGAGGA	3'	Yes	gp3	(((......(((((((........((((((.((((((((((((..((((((((((............)))))))))).)))))))))))).))))))))))))).....)))	112	50	-52.8	2066.76	2948.17	2008.94	1597.93	2303.46	1699.48	1933.56	2535.38	3487.84	2310.54	1822.51	2472.49	middle
44	59	mdo-miR-152-3p_R+2_1ss22GT	TCAGTGCATGACAGAACTTGGTCT	24					cccggcccAGGTTCTGTGATACACTCCGACTtagactctggagcagTCAGTGCATGACAGAACTTGGGcttgg	5	mdo-mir-152,hsa-mir-152,cgr-mir-152,mmu-mir-152,rno-mir-152,	mdo-mir-152	cccggcccAGGTTCTGTGATACACTCCGACTtagactctggagcagTCAGTGCATGACAGAACTTGGGcttgg	mdo-miR-152-3p	TCAGTGCATGACAGAACTTGGG	3'	Diff	gp3	((..(((((((((((((.((.((((..((((....((....)).)))))))).)).)))))))))))))..))	73	56.2	-34.3	2.62501	0.66251	0	0	0.819882	0.638181	1.92624	0.718339	0.86676	3.54999	1.86097	2.0333	low
46	60	bta-miR-154c	AGATATTGCACGGTTGATCTCT	22					ttcgaaaggaggttgtccgtgatgtatttgctttatttgtggcAGATATTGCACGGTTGATCTCTtttcttcatc	4	bta-mir-154c,oar-mir-3958,eca-mir-3958,cfa-mir-3958,	bta-mir-154c	ttcgaaaggaggttgtccgtgatgtatttgctttatttgtggcAGATATTGCACGGTTGATCTCTtttcttcatc	bta-miR-154c	AGATATTGCACGGTTGATCTCT	3'	Yes	gp3	...(((((((((((..(((((..(((((((((........)))))))))..)))))..)))))))))))......	66	40	-32.4	0	1.32502	1.03181	3.46999	0	0	0.770496	1.43668	0.86676	1.01428	0	0	low
47	61	sha-miR-181a-5p_R+7	AACATTCAACGCTGTCGGTGAGTTGT	26					atggagagcaacctacagataacttcagtgAACATTCAACGCTGTCGGTgagttttcagatttaaaagaaaccatcgaccgttgactgtaccttgaggtttatcagatgc	41	sha-mir-181a-2,ssc-mir-181a-2,ssc-mir-181a-1,ssc-mir-181c,bta-mir-181a-1,bta-mir-181a-2,bta-mir-181c,oar-mir-181a-1,oar-mir-181a-2,eca-mir-181a,eca-mir-181a-2,cfa-mir-181a-1,cfa-mir-181a-2,cfa-mir-181c,hsa-mir-181a-1,hsa-mir-181a-2,hsa-mir-181c,ppy-mir-181c,ggo-mir-181a-1,ggo-mir-181a-2,mml-mir-181a-2,mml-mir-181c,mne-mir-181a-2,sla-mir-181a-2,cgr-mir-181a,cgr-mir-181c,mmu-mir-181a-1,mmu-mir-181a…	sha-mir-181a-1	ttttttgaggttgcttcagtgAACATTCAACGCTGTCGGTgagtttggaattaaaatgaaaACCATCGACCGTTGATTGTaccctacagctaaccgac	sha-miR-181a-5p	AACATTCAACGCTGTCGGT	5'	Diff	gp3	.................(((((((((((...(((.((((((..(((((((.(((((...........)))))))))))))))))).)))...)))))))).)))......	87	41.8	-30.4	99.7505	70.2261	112.468	67.6649	110.684	52.3309	112.492	343.366	378.774	495.984	225.177	156.564	middle
47	62	hsa-miR-181a-3p_R+2_2ss16TG19TG	ACCATCGACCGTTGAGTGGACCTT	24					atggagagcaacctacagataacttcagtgAACATTCAACGCTGTCGGTgagttttcagatttaaaagaaaccatcgaccgttgactgtaccttgaggtttatcagatgc	41	sha-mir-181a-2,ssc-mir-181a-2,ssc-mir-181a-1,ssc-mir-181c,bta-mir-181a-1,bta-mir-181a-2,bta-mir-181c,oar-mir-181a-1,oar-mir-181a-2,eca-mir-181a,eca-mir-181a-2,cfa-mir-181a-1,cfa-mir-181a-2,cfa-mir-181c,hsa-mir-181a-1,hsa-mir-181a-2,hsa-mir-181c,ppy-mir-181c,ggo-mir-181a-1,ggo-mir-181a-2,mml-mir-181a-2,mml-mir-181c,mne-mir-181a-2,sla-mir-181a-2,cgr-mir-181a,cgr-mir-181c,mmu-mir-181a-1,mmu-mir-181a…	hsa-mir-181a-1	tgagttttgaggttgcttcagtgAACATTCAACGCTGTCGGTGAGTttggaattaaaatcaaaACCATCGACCGTTGATTGTACCctatggctaaccatcatctactcca	hsa-miR-181a-3p	ACCATCGACCGTTGATTGTACC	3'	Diff	gp3	.................(((((((((((...(((.((((((..(((((((.(((((...........)))))))))))))))))).)))...)))))))).)))......	87	41.8	-30.4	3.50002	2.65004	7.22269	3.46999	9.0187	3.82909	14.6394	6.46505	8.6676	13.1857	6.20322	6.77767	middle
48	63	bta-miR-181d_R+1	AACATTCATTGTTGTCGGTGGGTT	24					tcccctcccttaggccacagcgaaggtcacaatcAACATTCATTGTTGTCGGTGGGTtgtgacagagaccagacccaccgagggatgaatgtcactgtggctgggccagacac	37	bta-mir-181d,ssc-mir-181d,ssc-mir-181b-2,ssc-mir-181b-1,bta-mir-181b-1,bta-mir-181b-2,eca-mir-181b,cfa-mir-181d,cfa-mir-181b-2,cfa-mir-181b-1,hsa-mir-181d,hsa-mir-181b-1,ptr-mir-181d,ptr-mir-181b-2,ptr-mir-181b-1,ppy-mir-181d,ppy-mir-181b-2,ppy-mir-181b,ggo-mir-181d,mml-mir-181d,mml-mir-181b-1,cgr-mir-181d,cgr-mir-181b,mmu-mir-181d,mmu-mir-181b-2,mmu-mir-181b-1,rno-mir-181d,rno-mir-181b-2,rno-mir…	bta-mir-181d	tcccctcccttaggccacagcgaaggtcacaatcAACATTCATTGTTGTCGGTGGGTtgtgacagagaccagacccaccgagggatgaatgtcactgtggctgggccagacac	bta-miR-181d	AACATTCATTGTTGTCGGTGGGT	5'	Diff	gp3	............((((.((((......((((....(((((((((....((((((((((.((........))))))))))))..)))))))))...))))))))))))......	95	55.8	-42.8	6391.03	4787.3	10656.6	8100.7	7724.92	3936.3	12640	11441	11959.6	15960.8	7679.59	6066.69	high
49	64	bta-miR-185_R-4_1ss18CA	TGGAGAGAAAGGCAGTTA	18					gggggtgagggacTGGAGAGAAAGGCAGTTCCTGAtggtcccctccccaggggctggctttcctccggcccctccttcc	10	bta-mir-185,ssc-mir-185,cfa-mir-185,hsa-mir-185,ptr-mir-185,ggo-mir-185,mml-mir-185,cgr-mir-185,mmu-mir-185,rno-mir-185,	bta-mir-185	gggggtgagggacTGGAGAGAAAGGCAGTTCCTGAtggtcccctccccaggggctggctttcctccggcccctccttcc	bta-miR-185	TGGAGAGAAAGGCAGTTCCTGA	5'	Diff	gp3	((..(.(((((.((((((.(((((.(((..((((..((......)).))))..))).))))))))))).))))))..))	79	67.1	-50.2	3.50002	0.66251	0.515907	0.867499	0.409941	2.55272	0.385248	1.79585	1.73352	1.01428	1.24064	2.0333	low
50	65	mdo-miR-186-5p_R+2	CAAAGAATTCTCCTTTTGGGCTTAT	25					accttcCAAAGAATTCTCCTTTTGGGCTTttgattcttaatttcagCCCAAAGGTGAATTTTTTGGGa	11	mdo-mir-186,ssc-mir-186,bta-mir-186,eca-mir-186,cfa-mir-186,hsa-mir-186,mml-mir-186,cgr-mir-186,mmu-mir-186,rno-mir-186,oan-mir-186,	mdo-mir-186	accttcCAAAGAATTCTCCTTTTGGGCTTttgattcttaatttcagCCCAAAGGTGAATTTTTTGGGa	mdo-miR-186-5p	CAAAGAATTCTCCTTTTGGGCTT	5'	Diff	gp3	...(((((((((((((.(((((.(((((...((((...))))..)))))))))).)))))))))))))	65	36.8	-28.8	12.2501	13.2502	12.3818	13.88	26.2362	8.93454	19.2624	48.1287	31.2034	31.4428	28.5348	23.7218	middle
51	66	mdo-miR-187-3p_L-1R+3	CGTGTCTTGTGTTGCAGCCAGT	22					attgtgagacctcTGGCTACAACACAGGACACGGGAgcttttctgaacccTCGTGTCTTGTGTTGCAGCCagaggggcaca	2	mdo-mir-187,oan-mir-187,	mdo-mir-187	attgtgagacctcTGGCTACAACACAGGACACGGGAgcttttctgaacccTCGTGTCTTGTGTTGCAGCCagaggggcaca	mdo-miR-187-3p	TCGTGTCTTGTGTTGCAGCC	3'	Diff	gp3	..((((...(((((((((.((((((((((((((((..............)))))))))))))))).)))))))))..))))	79	54.3	-49.5	0	0	4.12725	0	0.819882	2.55272	1.54099	0	0	1.01428	0	0	low
52	67	bta-miR-193b_R-2	AACTGGCCCACAAAGTCCCGCT	22					gtggtcccagaatcggggttttgagggcgagatgagtttatgttttatccAACTGGCCCACAAAGTCCCGCTTTtggggtcat	10	bta-mir-193b,eca-mir-193b,hsa-mir-193b,ptr-mir-193b,cgr-mir-193b,mmu-mir-193b,rno-mir-193b,mdo-mir-193b,sha-mir-193,oan-mir-193,	bta-mir-193b	gtggtcccagaatcggggttttgagggcgagatgagtttatgttttatccAACTGGCCCACAAAGTCCCGCTTTtggggtcat	bta-miR-193b	AACTGGCCCACAAAGTCCCGCTTT	3'	Diff	gp3	(((..(((((((.((((..((((.((((.((.((..(.........)..)).)).)))).))))..)))).)))))))..)))	83	50.6	-41.2	29.7501	59.6259	106.793	102.365	49.6028	48.5018	83.2136	132.174	192.421	113.6	163.765	269.751	middle
54	69	cfa-miR-194_R+1	TGTAACAGCAACTCCATGTGGAT	23					TGTAACAGCAACTCCATGTGGAttgtgtgccaatttccagtggagatgctgttacttt	20	cfa-mir-194,ssc-mir-194a,ssc-mir-194b,bta-mir-194-2,bta-mir-194-1,oar-mir-194,eca-mir-194-2,eca-mir-194-1,hsa-mir-194-1,hsa-mir-194-2,ppy-mir-194,mml-mir-194-2,cgr-mir-194,mmu-mir-194-1,mmu-mir-194-2,rno-mir-194-1,rno-mir-194-2,oan-mir-194-1,oan-mir-194-2,	cfa-mir-194	TGTAACAGCAACTCCATGTGGAttgtgtgccaatttccagtggagatgctgttacttt	cfa-miR-194	TGTAACAGCAACTCCATGTGGA	5'	Diff	gp3	.(((((((((.(((((((..(((((.....)))))..)).))))).)))))))))...	54	43.1	-27.4	1.75001	5.30008	2.06363	0	5.73917	6.38181	3.08198	5.02837	5.20056	2.02857	3.10161	7.45544	low
55	70	bta-miR-200a_R-1	TAACACTGTCTGGTAACGATGT	22					gggcctctgtggacatcttaccggacagtgctggatttctcggctcgactcTAACACTGTCTGGTAACGATGTTcaaaggtgaccc	25	bta-mir-200a,bta-mir-141,eca-mir-200a,eca-mir-141,cfa-mir-141,hsa-mir-200a,hsa-mir-141,ppa-mir-141,ptr-mir-200a,ptr-mir-141,ppy-mir-200a,ppy-mir-141,ggo-mir-200a,ggo-mir-141,mml-mir-200a,mml-mir-141,cgr-mir-141,mmu-mir-141,rno-mir-200a,rno-mir-141,mdo-mir-200a,mdo-mir-141,sha-mir-200a,sha-mir-141,oan-mir-200a,	bta-mir-200a	gggcctctgtggacatcttaccggacagtgctggatttctcggctcgactcTAACACTGTCTGGTAACGATGTTcaaaggtgaccc	bta-miR-200a	TAACACTGTCTGGTAACGATGTT	3'	Diff	gp3	(((..(((.(((((((((((((((((((((.((((....(((...))).)))).))))))))))))).)))))))).)))...)))	86	53.5	-39.6	0.875004	18.5503	1.54772	0	2.86959	3.82909	5.39347	12.5709	12.568	19.7785	6.20322	2.0333	middle
57	72	hsa-miR-203a-5p_R-3	AGTGGTTCTTAACAGTTCAACA	22					tgttggggactcgcgcgctgggtccagtggttcttaacagttcaacagttctgtagcgcaattGTGAAATGTTTAGGACCACTAGactcggcgggcgcggcgacagcga	8	ptr-mir-203,cfa-mir-203,hsa-mir-203a,ppy-mir-203,mml-mir-203,mmu-mir-203,rno-mir-203a,mdo-mir-203,	hsa-mir-203a	gtgttggggactcgcgcgctgggtccAGTGGTTCTTAACAGTTCAACAGTTctgtagcgcaattGTGAAATGTTTAGGACCACTAGacccggcgggcgcggcgacagcga	hsa-miR-203a-5p	AGTGGTTCTTAACAGTTCAACAGTT	5'	Diff	gp3	(((((......(((.(((((((((.(((((((((.((((.((((.((((..((.....)))))))))).)))).))))))))).))))))))).)))......))))).	108	56	-50.5	24.5001	33.1255	5.15907	19.085	31.9754	38.2909	10.0164	10.0567	17.3352	8.11426	26.0535	25.7551	middle
57	73	ptr-miR-203_L-1R+1	TGAAATGTTTAGGACCACTAGT	22					tgttggggactcgcgcgctgggtccagtggttcttaacagttcaacagttctgtagcgcaattGTGAAATGTTTAGGACCACTAGactcggcgggcgcggcgacagcga	8	ptr-mir-203,cfa-mir-203,hsa-mir-203a,ppy-mir-203,mml-mir-203,mmu-mir-203,rno-mir-203a,mdo-mir-203,	ptr-mir-203	tgttggggactcgcgcgctgggtccagtggttcttaacagttcaacagttctgtagcgcaattGTGAAATGTTTAGGACCACTAGactcggcgggcgcggcgacagcga	ptr-miR-203	GTGAAATGTTTAGGACCACTAG	3'	Diff	gp3	(((((......(((.(((((((((.(((((((((.((((.((((.((((..((.....)))))))))).)))).))))))))).))))))))).)))......))))).	108	56	-50.5	6378.78	7502.27	4445.05	2772.53	7766.74	5674.71	6234.08	6732.27	6765.93	7078.68	6066.13	5157.81	middle
58	74	ggo-miR-203b	TTGAACTGTTAAGAACCACTGG	22					gctccgtcgccgtcgccgcgcccgccgggtctagtggtcctaaacatttcacaattgcgctacagaactgTTGAACTGTTAAGAACCACTGGacccagcgcgcgagtcccca	3	ggo-mir-203b,hsa-mir-203b,rno-mir-203b,	ggo-mir-203b	gctccgtcgccgtcgccgcgcccgccgggtctagtggtcctaaacatttcacaattgcgctacagaactgTTGAACTGTTAAGAACCACTGGacccagcgcgcgagtcccca	ggo-miR-203b	TTGAACTGTTAAGAACCACTGG	3'	Yes	gp3	((......))....(((((((..((.((((((((((((.((.((((.((((((.(((.....)))...)).)))).)))).)).)))))))))))).))))))).)).....	93	59.8	-43.1	35.0002	41.0757	15.4772	19.085	58.2116	26.8036	17.7214	10.7751	16.4684	11.1571	14.2674	20.333	middle
59	75	cgr-miR-210-3p_2ss21GA22AT	CTGTGCGTGTGACAGCGGCTAT	22					ggctcaggacAGCCACTGCCCACCGCACACTGcgttgctccggacccaCTGTGCGTGTGACAGCGGCTGAtctgtccct	11	cgr-mir-210,ssc-mir-210,bta-mir-210,cfa-mir-210,hsa-mir-210,ptr-mir-210,ggo-mir-210,mml-mir-210,mmu-mir-210,rno-mir-210,mdo-mir-210,	cgr-mir-210	ggctcaggacAGCCACTGCCCACCGCACACTGcgttgctccggacccaCTGTGCGTGTGACAGCGGCTGAtctgtccct	cgr-miR-210-3p	CTGTGCGTGTGACAGCGGCTGA	3'	Diff	gp3	((..(((..(((((.(((..(((((((((.((.(((......))).)).)))))).))).))).)))))..)))..)).	78	65.8	-36.9	5.25002	13.2502	6.19088	12.145	4.09941	6.38181	1.54099	2.87336	6.93408	0	4.96258	7.45544	middle
60	76	mmu-miR-215-5p_R+1	ATGACCTATGATTTGACAGACC	22					agctctcagcatcaacggtgtacaggagaATGACCTATGATTTGACAGACcgtgcagctgtgtatgTCTGTCATTCTGTAGGCCAATattctgtatgtcactgctacttaaa	7	mmu-mir-215,cgr-mir-215,mmu-mir-192,rno-mir-215,rno-mir-192,mdo-mir-215,oan-mir-192,	mmu-mir-215	agctctcagcatcaacggtgtacaggagaATGACCTATGATTTGACAGACcgtgcagctgtgtatgTCTGTCATTCTGTAGGCCAATattctgtatgtcactgctacttaaa	mmu-miR-215-5p	ATGACCTATGATTTGACAGAC	5'	Diff	gp3	.......((((.....(..((((((((...((.(((((((..((((((((.(((((....))))))))))))).)).))))).))...))))))))..)..)))).......	98	43.8	-37.1	0	0	0	0	0	0	0	56.7488	50.2721	74.0427	39.7006	3.38884	middle
60	77	mmu-miR-215-3p	TCTGTCATTCTGTAGGCCAAT	21					agctctcagcatcaacggtgtacaggagaATGACCTATGATTTGACAGACcgtgcagctgtgtatgTCTGTCATTCTGTAGGCCAATattctgtatgtcactgctacttaaa	7	mmu-mir-215,cgr-mir-215,mmu-mir-192,rno-mir-215,rno-mir-192,mdo-mir-215,oan-mir-192,	mmu-mir-215	agctctcagcatcaacggtgtacaggagaATGACCTATGATTTGACAGACcgtgcagctgtgtatgTCTGTCATTCTGTAGGCCAATattctgtatgtcactgctacttaaa	mmu-miR-215-3p	TCTGTCATTCTGTAGGCCAAT	3'	Yes	gp3	.......((((.....(..((((((((...((.(((((((..((((((((.(((((....))))))))))))).)).))))).))...))))))))..)..)))).......	98	43.8	-37.1	0	0	0	0	0	0	0	0.718339	2.60028	4.05713	0	0	low
61	78	oan-miR-223-3p_1ss22AT	TGTCAGTTTGTCAAATACCCTT	22					gcgaccacgtgaccacaccgcagtgccgcgctcCGTGTATTTGACAAGCTGAGTTGgacactccgtgtggtttgagTGTCAGTTTGTCAAATACCCTAagtgaggcatgctcacccatgtttgc	2	oan-mir-223,bta-mir-223,	oan-mir-223	gcgaccacgtgaccacaccgcagtgccgcgctcCGTGTATTTGACAAGCTGAGTTGgacactccgtgtggtttgagTGTCAGTTTGTCAAATACCCTAagtgaggcatgctcacccatgtttgc	oan-miR-223-3p	TGTCAGTTTGTCAAATACCCTA	3'	Diff	gp3	((((.((.((((.......(((.((((.((((....((((((((((((((((.(..(((((.....)).)))..)...))))))))))))))))....)))).)))))))))))...)).))))	124	54	-45	409.502	421.357	150.645	147.475	72.1496	91.8981	14.6394	72.5522	58.9397	6.0857	66.3745	137.587	middle
62	79	bta-miR-224_R-1	CAAGTCACTAGTGGTTCCGTTT	22					gggctttCAAGTCACTAGTGGTTCCGTTTAgtagatggttgtacattgtttcaaaatggtaccctagtgactacaaagccc	7	bta-mir-224,ssc-mir-224,eca-mir-224,cfa-mir-224,hsa-mir-224,mmu-mir-224,rno-mir-224,	bta-mir-224	gggctttCAAGTCACTAGTGGTTCCGTTTAgtagatggttgtacattgtttcaaaatggtaccctagtgactacaaagccc	bta-miR-224	CAAGTCACTAGTGGTTCCGTTTA	5'	Diff	gp3	(((((((..(((((((((.(((.((((((....((((......))))......)))))).))))))))))))..)))))))	81	43.2	-36.5	0	0	0	0	0	0	3.08198	0.718339	0	3.04285	0	0	low
63	80	bta-miR-296-5p_R+2_1ss7CT	GAGGGCTCCCCCCAATCCTGT	21					aggacccttccgGAGGGCCCCCCCCAATCCTgttgtgcttggttcaGAGGGTTGGGCGGAGGCTTTCCtgaagggtct	9	bta-mir-296,ssc-mir-296,eca-mir-296,hsa-mir-296,ptr-mir-296,ppy-mir-296,ggo-mir-296,mmu-mir-296,rno-mir-296,	bta-mir-296	aggacccttccgGAGGGCCCCCCCCAATCCTgttgtgcttggttcaGAGGGTTGGGCGGAGGCTTTCCtgaagggtct	bta-miR-296-5p	GAGGGCCCCCCCCAATCCT	5'	Diff	gp3	.(((((((((.(((..(((.(((((((((((.(((..(...)..)))))))))))).)).)))..))).)))))))))	77	62.8	-48.4	0	1.32502	4.12725	1.735	0.819882	1.27636	2.31149	0	1.73352	1.01428	0.620322	0.677767	low
64	81	mml-miR-320b_1ss22AT	AAAAGCTGGGTTGAGAGGGCAT	22					gttatttttagtcttctacctaagaattctgtctcttaggctttctcttcccagttttcccaaagttgggAAAAGCTGGGTTGAGAGGGCAAaaggaaaaagaaaaaaaa	34	mml-mir-320b,ssc-mir-320,bta-mir-320a-2,bta-mir-320a-1,cfa-mir-320,hsa-mir-320b-2,hsa-mir-320b-1,hsa-mir-320a,hsa-mir-320c-1,hsa-mir-320c-2,hsa-mir-320d-1,hsa-mir-320d-2,hsa-mir-4429,ptr-mir-320b-2,ptr-mir-320b-1,ptr-mir-320a,ptr-mir-320c-2,ptr-mir-320c-1,ptr-mir-320d-3,ptr-mir-320d-2,ptr-mir-320d-1,ppy-mir-320b-2,ppy-mir-320b-1,ppy-mir-320c-1,ppy-mir-320c-2,ppy-mir-320d-1,ggo-mir-320a,ggo-mir-32…	mml-mir-320b	gttatttttagtcttctacctaagaattctgtctcttaggctttctcttcccagttttcccaaagttgggAAAAGCTGGGTTGAGAGGGCAAaaggaaaaagaaaaaaaa	mml-miR-320b	AAAAGCTGGGTTGAGAGGGCAA	3'	Diff	gp3	...((((((((........))))))))(((...((((..((..((((..(((((((((((((....)))).)))))))))..))))..))...))))...))).......	76	37.3	-38.5	22.7501	29.1505	36.1135	29.495	34.0251	13.4018	48.5413	48.1287	51.5722	37.5285	44.9734	66.7601	middle
65	82	bta-miR-323	GCACATTACACGGTCGACCTCT	22					ttggtacttggagagaggtggtccgtggcgcgttcgctttatttatggcGCACATTACACGGTCGACCTCTttgcagtatctaatc	8	bta-mir-323,ssc-mir-323,oar-mir-323a,oar-mir-323c,cfa-mir-323,ptr-mir-323,ggo-mir-323a,mmu-mir-323,	bta-mir-323	ttggtacttggagagaggtggtccgtggcgcgttcgctttatttatggcGCACATTACACGGTCGACCTCTttgcagtatctaatc	bta-miR-323	GCACATTACACGGTCGACCTCT	3'	Yes	gp3	..(((((.((.((((((((((.(((((....((.((((........)))).))....))))))).)))))))).))))))).....	79	50	-34.5	0	0	0	1.735	0	0	0	0	0	4.05713	0	0	low
66	83	cgr-miR-326_R+1	CCTCTGGGCCCTTCCTCCAGTT	22					ctattgggctgggggcagggcctttgtgaaggcgggttatgctcggatcgCCTCTGGGCCCTTCCTCCAGTcccgaggca	10	cgr-mir-326,ssc-mir-326,bta-mir-326,eca-mir-326,cfa-mir-326,hsa-mir-326,ptr-mir-326,ggo-mir-326,mmu-mir-326,rno-mir-326,	cgr-mir-326	ctattgggctgggggcagggcctttgtgaaggcgggttatgctcggatcgCCTCTGGGCCCTTCCTCCAGTcccgaggca	cgr-miR-326	CCTCTGGGCCCTTCCTCCAGT	3'	Diff	gp3	...((((((((((((.(((((((..((((...((((.....))))..))))....))))))).))))))).)))))....	73	65	-42.9	309.751	229.229	578.847	595.104	460.773	359.934	416.838	364.198	460.25	331.671	478.268	513.747	middle
67	84	mmu-miR-330-5p_R+1	TCTCTGGGCCTGTGTCTTAGGCT	23					gaccctttggcgatctctgccTCTCTGGGCCTGTGTCTTAGGCtcttcaagatccaacgaGCAAAGCACAGGGCCTGCAGAGAggtagcgctctgctc	6	mmu-mir-330,bta-mir-330,hsa-mir-330,ptr-mir-330,ggo-mir-330,rno-mir-330,	mmu-mir-330	gaccctttggcgatctctgccTCTCTGGGCCTGTGTCTTAGGCtcttcaagatccaacgaGCAAAGCACAGGGCCTGCAGAGAggtagcgctctgctc	mmu-miR-330-5p	TCTCTGGGCCTGTGTCTTAGGC	5'	Diff	gp3	........((((....(((((((((((((((((((.(((..((((.............)))).))))))).))))..)))))))))))))))......	84	58.2	-41	345.627	258.379	970.42	575.152	432.488	564.152	1218.92	1213.63	1367.75	1739.5	1030.67	365.316	middle
69	85	ppy-miR-331-3p_R+4	GCCCCTGGGCCTATCCTAGACA	22					gagtttggttttgtttgggtttgttCTAGGTATGGTCCCAGGGATCCcagatcaaaccagGCCCCTGGGCCTATCCTAaacaacctaa	12	ppy-mir-331,ssc-mir-331,bta-mir-331,eca-mir-331,aja-mir-331,hsa-mir-331,ptr-mir-331,ggo-mir-331,mml-mir-331,cgr-mir-331,mmu-mir-331,rno-mir-331,	ppy-mir-331	gagtttggttttgtttgggtttgttCTAGGTATGGTCCCAGGGATCCcagatcaaaccagGCCCCTGGGCCTATCCTAaacaacctaa	ppy-miR-331-3p	GCCCCTGGGCCTATCCTA	3'	Diff	gp3	..............(((((.(((((.((((.((((.(((((((..(.............)..))))))).))))))))))))))))))	74	48.9	-30.9	7.00003	3.97506	15.4772	13.88	13.938	6.38181	3.85248	9.3384	13.8682	13.1857	11.1658	6.0999	middle
70	86	ssc-miR-339_R+2	TCCCTGTCCTCCAGGAGCTCACT	23					gcagccgccgTCCCTGTCCTCCAGGAGCTCActtaccttgggccgtgAGCTCCTCGAGGCCAGAGCCCgtgtctgcctct	13	ssc-mir-339-1,ssc-mir-339-2,ssc-mir-4334,bta-mir-339a,bta-mir-339b,cfa-mir-339-1,hsa-mir-339,ppy-mir-339,mml-mir-339,cgr-mir-339,mmu-mir-339,rno-mir-339,rno-mir-3586,	ssc-mir-339-2	taagacaaggTCCCTGTCCTCCAGGAGCTCAtggtccaatagaagcatatatacaaatggctctgaggggagatcccgctgtggct	ssc-miR-339	TCCCTGTCCTCCAGGAGCTCA	5'	Diff	gp3	((((.(((.((..(((.((((.((((((((((...((...))..)))))))))).)))).))).))..))).))))....	76	67.5	-37.3	4494.02	3890.92	6821.32	4912.64	5719.9	3926.73	9214.75	6749.51	6916.75	9023.06	6936.44	6526.56	high
70	87	ssc-miR-339-3p_L+2R-1_1ss22CT	TGAGCTCCTCGAGGCCAGAGCT	22					gcagccgccgTCCCTGTCCTCCAGGAGCTCActtaccttgggccgtgAGCTCCTCGAGGCCAGAGCCCgtgtctgcctct	13	ssc-mir-339-1,ssc-mir-339-2,ssc-mir-4334,bta-mir-339a,bta-mir-339b,cfa-mir-339-1,hsa-mir-339,ppy-mir-339,mml-mir-339,cgr-mir-339,mmu-mir-339,rno-mir-339,rno-mir-3586,	ssc-mir-339-1	gcagccgccgTCCCTGTCCTCCAGGAGCTCActtaccttgggccgtgAGCTCCTCGAGGCCAGAGCCCgtgtctgcctct	ssc-miR-339-3p	AGCTCCTCGAGGCCAGAGCCC	3'	Diff	gp3	((((.(((.((..(((.((((.((((((((((...((...))..)))))))))).)))).))).))..))).))))....	76	67.5	-37.3	26.2501	19.8753	22.6999	13.88	34.435	22.9745	18.4919	22.9868	19.0687	25.3571	20.4706	34.5661	middle
71	88	hsa-miR-339-5p_1ss23GA	TCCCTGTCCTCCAGGAGCTCACA	23					gtcctgtgctccgcaggggcggggcggccgctctccctgtcctccaggagctcacgtgtgcctgcctgTGAGCGCCTCGACGACAGAGCCGgcgcctgccccagtgtctgc	6	ggo-mir-339,hsa-mir-339,ptr-mir-339,mml-mir-339,mmu-mir-339,rno-mir-339,	hsa-mir-339	cggggcggccgctcTCCCTGTCCTCCAGGAGCTCACGtgtgcctgcctgTGAGCGCCTCGACGACAGAGCCGgcgcctgccccagtgtctgcgc	hsa-miR-339-5p	TCCCTGTCCTCCAGGAGCTCACG	5'	Diff	gp3	............((((..(((((((((.((((....(((((.((.(((.((((((..((....))..)))))).))).)).)))))....)))).))))))).))..))))	99	73	-53.8	315.001	264.342	310.576	340.927	318.524	286.543	359.436	301.702	401.31	285.014	354.204	489.687	middle
72	89	cgr-miR-340-5p	TTATAAAGCAATGAGACTGATT	22					ttggtgtgaTTATAAAGCAATGAGACTGATTgtcatatgtcgtttgtgggaTCCGTCTCAGTTACTTTATAGCCatacctggta	13	cgr-mir-340,ssc-mir-340-1,ssc-mir-340-2,eca-mir-340,cfa-mir-340,hsa-mir-340,ptr-mir-340,ppy-mir-340,ggo-mir-340,mml-mir-340,mmu-mir-340,rno-mir-340-2,	cgr-mir-340	ttggtgtgaTTATAAAGCAATGAGACTGATTgtcatatgtcgtttgtgggaTCCGTCTCAGTTACTTTATAGCCatacctggta	cgr-miR-340-5p	TTATAAAGCAATGAGACTGATT	5'	Yes	gp3	..((((((..(((((((...((((((.(((...((((.......))))..))).))))))....)))))))..)))))).....	77	39.3	-27.1	5327.9	7871.95	9626.82	6060.35	7763.32	4837.2	11555.5	14879.7	11755.4	13920.5	10378.3	7459.5	high
74	90	eca-miR-342-5p_L-1R+1_2ss2GA18TC	AGGGTGCTATCTGTGACTGAGG	22					aaggtgagggtgctatctgtgactgagggacatggcgcatagaactgTCTCACACAGAAATCGCACCCGTCAccttggcc	9	ssc-mir-342,bta-mir-342,eca-mir-342,cfa-mir-342,hsa-mir-342,ptr-mir-342,ggo-mir-342,cgr-mir-342,mmu-mir-342,	eca-mir-342	gaacctgggctcaaggtgAGGGGTGCTATCTGTGATTGAGggacatggcaaatagaattgTCTCACACAGAAATCGCACCCGTcaccttggcccgccta	eca-miR-342-5p	AGGGGTGCTATCTGTGATTGAG	5'	Diff	gp3	(((((((((((((..((((((.....((((((.............)))))).))))))....)))))).)))))))....	76	55	-32.8	1914.51	1431.02	2119.34	1776.64	1147.83	862.821	2185.9	2032.9	1919.01	2851.15	1613.46	1621.9	middle
74	91	ssc-miR-342_R-1	TCTCACACAGAAATCGCACCCGTC	24					aaggtgagggtgctatctgtgactgagggacatggcgcatagaactgTCTCACACAGAAATCGCACCCGTCAccttggcc	9	ssc-mir-342,bta-mir-342,eca-mir-342,cfa-mir-342,hsa-mir-342,ptr-mir-342,ggo-mir-342,cgr-mir-342,mmu-mir-342,	ssc-mir-342	aaggtgagggtgctatctgtgactgagggacatggcgcatagaactgTCTCACACAGAAATCGCACCCGTCAccttggcc	ssc-miR-342	TCTCACACAGAAATCGCACCCGTCA	3'	Diff	gp3	(((((((((((((..((((((.....((((((.............)))))).))))))....)))))).)))))))....	76	55	-32.8	10262	9646.15	16466.7	13139.1	10105	8769.89	23772.9	21591.1	20563	28758	22194.5	23859.4	high
75	92	bta-miR-345-5p_R+1	GCTGACTCCTAGTCCAGTGCTG	22					acccaaacccaggtctGCTGACTCCTAGTCCAGTGCTtgtgatggctggtgggcCCTGAACTAGGGGTCTGGAGgcctgggtttgaatatc	10	bta-mir-345,ssc-mir-345-1,ssc-mir-345-2,eca-mir-345,hsa-mir-345,ptr-mir-345,ppy-mir-345,ggo-mir-345,cgr-mir-345,mmu-mir-345,	bta-mir-345	acccaaacccaggtctGCTGACTCCTAGTCCAGTGCTtgtgatggctggtgggcCCTGAACTAGGGGTCTGGAGgcctgggtttgaatatc	bta-miR-345-5p	GCTGACTCCTAGTCCAGTGCT	5'	Diff	gp3	...(((((((((((((.((((((((((((.(((.(((..(........)..))).))).)))))))))).)))))))))))))))......	82	57.1	-50.6	14.8751	15.9003	19.0885	32.0975	18.0374	13.4018	16.1804	20.4727	19.9355	12.6785	17.369	24.0607	middle
75	93	bta-miR-345-3p_L+1R+2	CCCTGAACTAGGGGTCTGGAGAT	23					acccaaacccaggtctGCTGACTCCTAGTCCAGTGCTtgtgatggctggtgggcCCTGAACTAGGGGTCTGGAGgcctgggtttgaatatc	10	bta-mir-345,ssc-mir-345-1,ssc-mir-345-2,eca-mir-345,hsa-mir-345,ptr-mir-345,ppy-mir-345,ggo-mir-345,cgr-mir-345,mmu-mir-345,	bta-mir-345	acccaaacccaggtctGCTGACTCCTAGTCCAGTGCTtgtgatggctggtgggcCCTGAACTAGGGGTCTGGAGgcctgggtttgaatatc	bta-miR-345-3p	CCTGAACTAGGGGTCTGGAG	3'	Diff	gp3	...(((((((((((((.((((((((((((.(((.(((..(........)..))).))).)))))))))).)))))))))))))))......	82	57.1	-50.6	0	0	1.03181	0.867499	0	1.27636	1.15574	2.15502	3.46704	3.54999	1.24064	0.338884	low
77	94	ggo-miR-361	TTATCAGAATCTCCAGGGGTAC	22					ttttcctgggatttgggagcTTATCAGAATCTCCAGGGGTACtttataatttcaaaaagtcccccaggtgtgattctgatttgcttccttttcctcctcctgctctgagaat	9	ggo-mir-361,ssc-mir-361,bta-mir-361,eca-mir-361,cfa-mir-361,hsa-mir-361,cgr-mir-361,mmu-mir-361,rno-mir-361,	ggo-mir-361	ttttcctgggatttgggagcTTATCAGAATCTCCAGGGGTACtttataatttcaaaaagtcccccaggtgtgattctgatttgcttccttttcctcctcctgctctgagaat	ggo-miR-361	TTATCAGAATCTCCAGGGGTAC	5'	Yes	gp3	.......((((...((((((..(((((((((.((.((((.(((((..........))))).)))).))...)))))))))..))))))...)))).(((.......)))...	88	42.9	-41.3	880.254	1087.18	842.991	732.169	1165.87	1074.7	920.358	1003.52	1167.96	1062.97	1206.22	1456.18	middle
77	95	ssc-miR-361-3p_L+1R-3	TCCCCCAGGTGTGATTCTGATT	22					ttttcctgggatttgggagcTTATCAGAATCTCCAGGGGTACtttataatttcaaaaagtcccccaggtgtgattctgatttgcttccttttcctcctcctgctctgagaat	9	ggo-mir-361,ssc-mir-361,bta-mir-361,eca-mir-361,cfa-mir-361,hsa-mir-361,cgr-mir-361,mmu-mir-361,rno-mir-361,	ssc-mir-361	ggagcTTATCAGAATCTCCAGGGGTACttataatttgaaaaagtCCCCCAGGTGTGATTCTGATTTGCttcctcctcctc	ssc-miR-361-3p	CCCCCAGGTGTGATTCTGATTTGC	3'	Diff	gp3	.......((((...((((((..(((((((((.((.((((.(((((..........))))).)))).))...)))))))))..))))))...)))).(((.......)))...	88	42.9	-41.3	668.503	983.166	901.289	590.767	967.87	749.863	875.669	853.386	1226.9	768.319	832.782	926.846	middle
79	98	bta-miR-374a_R+1	TTATAATACAACCTGATAAGTGA	23					tacatcggccaTTATAATACAACCTGATAAGTGttacagcacttatcaggttgtattgtaattgtctgtgta	18	bta-mir-374a,ssc-mir-374a,ssc-mir-374b,bta-mir-374b,eca-mir-374b,cfa-mir-374a,cfa-mir-374b,hsa-mir-374a,hsa-mir-374b,ptr-mir-374a,ptr-mir-374b,ppy-mir-374a,ggo-mir-374b,mml-mir-374a,cgr-mir-374,mmu-mir-374b,mmu-mir-374c,rno-mir-374,	bta-mir-374a	tacatcggccaTTATAATACAACCTGATAAGTGttacagcacttatcaggttgtattgtaattgtctgtgta	bta-miR-374a	TTATAATACAACCTGATAAGTG	5'	Diff	gp3	((((..(((.((((((((((((((((((((((((....)))))))))))))))))))))))).)))..))))	72	34.7	-40.8	915.254	723.461	590.197	656.696	726.005	850.057	715.791	943.179	985.073	788.098	1067.26	1542.82	middle
79	99	ssc-miR-374a-3p	CTTATCAGGTTGTATTGTAATT	22					tacatcggccaTTATAATACAACCTGATAAGTGttacagcacttatcaggttgtattgtaattgtctgtgta	18	bta-mir-374a,ssc-mir-374a,ssc-mir-374b,bta-mir-374b,eca-mir-374b,cfa-mir-374a,cfa-mir-374b,hsa-mir-374a,hsa-mir-374b,ptr-mir-374a,ptr-mir-374b,ppy-mir-374a,ggo-mir-374b,mml-mir-374a,cgr-mir-374,mmu-mir-374b,mmu-mir-374c,rno-mir-374,	ssc-mir-374a	catcggccaTTATAATACAACCTGATAAGTGttacagcaCTTATCAGGTTGTATTGTAATTgtctgtgtatatatatgcc	ssc-miR-374a-3p	CTTATCAGGTTGTATTGTAATT	3'	Yes	gp3	((((..(((.((((((((((((((((((((((((....)))))))))))))))))))))))).)))..))))	72	34.7	-40.8	3115.01	3483.48	2488.73	1944.06	3125.39	2397.65	3801.24	3751.88	4030.44	4072.35	2949.01	2511.47	middle
81	101	cgr-miR-378-5p_R-1_1ss21GT	CTCCTGACTCCAGGTCCTGTT	21					cacccagggCTCCTGACTCCAGGTCCTGTGTgttacctcgaaatagcACTGGACTTGGAGTCAGAAGGCctgagtggag	36	cgr-mir-378,ssc-mir-378-2,ssc-mir-378-1,ssc-mir-378b,bta-mir-378-2,bta-mir-378-1,bta-mir-378b,bta-mir-378c,bta-mir-378d,cfa-mir-378,hsa-mir-378a,hsa-mir-378c,hsa-mir-378i,hsa-mir-378d-1,hsa-mir-378d-2,hsa-mir-378f,hsa-mir-422a,hsa-mir-378g,hsa-mir-378b,hsa-mir-378e,hsa-mir-378h,ptr-mir-378a,ptr-mir-422a,ptr-mir-378e,ppy-mir-378a,ppy-mir-378d,ppy-mir-378b,ppy-mir-378e,ggo-mir-378a,ggo-mir-378b,mml…	cgr-mir-378	cacccagggCTCCTGACTCCAGGTCCTGTGTgttacctcgaaatagcACTGGACTTGGAGTCAGAAGGCctgagtggag	cgr-miR-378-5p	CTCCTGACTCCAGGTCCTGTGT	5'	Diff	gp3	(((.((((.((.((((((((((((((...((((((........)))))).)))))))))))))).)).)))).)))...	76	57	-45.7	3.50002	5.30008	0	5.20499	7.37893	11.4873	8.47546	2.87336	5.20056	3.04285	9.30483	6.77767	middle
81	102	ssc-miR-378b-3p_R+1_1ss21TG	ACTGGACTTGGAGTCAGAAGGA	22					cacccagggCTCCTGACTCCAGGTCCTGTGTgttacctcgaaatagcACTGGACTTGGAGTCAGAAGGCctgagtggag	36	cgr-mir-378,ssc-mir-378-2,ssc-mir-378-1,ssc-mir-378b,bta-mir-378-2,bta-mir-378-1,bta-mir-378b,bta-mir-378c,bta-mir-378d,cfa-mir-378,hsa-mir-378a,hsa-mir-378c,hsa-mir-378i,hsa-mir-378d-1,hsa-mir-378d-2,hsa-mir-378f,hsa-mir-422a,hsa-mir-378g,hsa-mir-378b,hsa-mir-378e,hsa-mir-378h,ptr-mir-378a,ptr-mir-422a,ptr-mir-378e,ppy-mir-378a,ppy-mir-378d,ppy-mir-378b,ppy-mir-378e,ggo-mir-378a,ggo-mir-378b,mml…	ssc-mir-378b	ttgagctacatttgcttgcgttctctaagtgtctggctgaaaacgcACTGGACTTGGAGTCAGAAGTtgaggttcct	ssc-miR-378b-3p	ACTGGACTTGGAGTCAGAAGT	3'	Diff	gp3	(((.((((.((.((((((((((((((...((((((........)))))).)))))))))))))).)).)))).)))...	76	57	-45.7	2161.26	1623.15	1594.67	1814.81	1593.44	1681.61	1697.02	2094.32	2272.21	1747.61	1464.27	1319.95	middle
82	103	bta-miR-379_R+1	TGGTAGACTATGGAACGTAGGA	22					tggttcctgcagagaTGGTAGACTATGGAACGTAGGctttgtgatttttgacctatgtaacatggtccactaactctcagtatcca	11	bta-mir-379,oar-mir-379,eca-mir-379,cfa-mir-379,hsa-mir-379,ptr-mir-379,ppy-mir-379,ggo-mir-379,cgr-mir-379,mmu-mir-379,rno-mir-379,	bta-mir-379	tggttcctgcagagaTGGTAGACTATGGAACGTAGGctttgtgatttttgacctatgtaacatggtccactaactctcagtatcca	bta-miR-379	TGGTAGACTATGGAACGTAGG	5'	Diff	gp3	.((...(((.((((.((((.(((((((..(((((((...............)))))))..))))))).)))).)))))))...)).	84	43	-32.9	0	1.32502	1.03181	0	0	0	10.7869	4.31003	4.3338	13.1857	3.72193	0	middle
83	104	bta-miR-380-3p	TATGTAATGTGGTCCACGTCT	21					aagaTGGTTGACCATAGAACATGCGCtgtctctatgtcgTATGTAATGTGGTCCACGTCTt	7	bta-mir-380,oar-mir-380,eca-mir-380,cfa-mir-380,mml-mir-380,mmu-mir-380,rno-mir-380,	bta-mir-380	aagaTGGTTGACCATAGAACATGCGCtgtctctatgtcgTATGTAATGTGGTCCACGTCTt	bta-miR-380-3p	TATGTAATGTGGTCCACGTCT	3'	Yes	gp3	((((((...(((((((..((((((((.........).)))))))..)))))))..))))))	61	44.3	-23.9	15.7501	11.9252	18.5726	27.76	8.19882	8.93454	12.3279	13.6484	9.53436	8.11426	6.20322	10.8443	middle
84	105	bta-miR-381_1ss4AG	TATGCAAGGGCAAGCTCTCTGT	22					tactcagagcgaggttgccctttgtatattcggttttttgatgtagaaTATACAAGGGCAAGCTCTCTGTgagta	7	bta-mir-381,oar-mir-381,eca-mir-381,hsa-mir-381,ptr-mir-381,ggo-mir-381,cgr-mir-381,	bta-mir-381	tactcagagcgaggttgccctttgtatattcggttttttgatgtagaaTATACAAGGGCAAGCTCTCTGTgagta	bta-miR-381	TATACAAGGGCAAGCTCTCTGT	3'	Diff	gp3	((((((.((.(((.((((((.((((((((((..............)))))))))))))))).))).)).))))))	75	41.3	-37.5	0	1.32502	1.03181	3.46999	0	0	0	0	0	0	2.48129	0	low
85	106	hsa-miR-411-5p_L+1R-1	ATAGTAGACCGTATAGCGTAC	21					tggtacttggagagaTAGTAGACCGTATAGCGTACGctttatctgtgacgTATGTAACACGGTCCACTAACCctcagtatcaaatccatccccgag	8	hsa-mir-411,ssc-mir-411,oar-mir-411a,oar-mir-411b,oar-mir-379,hsa-mir-379,mmu-mir-379,rno-mir-379,	hsa-mir-411	tggtacttggagagaTAGTAGACCGTATAGCGTACGctttatctgtgacgTATGTAACACGGTCCACTAACCctcagtatcaaatccatccccgag	hsa-miR-411-5p	TAGTAGACCGTATAGCGTACG	5'	Diff	gp3	(((((((..(((...((((.((((((...(((((((.((.......)))))))))...)))))).))))...))))))))))..............	82	46.9	-28.8	0	0	0	8.67499	0.409941	0	17.3362	6.10588	9.10098	14.2	4.65242	0	middle
87	108	ggo-miR-421_R+1	ATCAACAGACATTAATTGGGCGT	23					gtattcacagtgcctaatccggtgcacattgtaggcctcattaaatgtttgttgaatgaaaaaatgaatcATCAACAGACATTAATTGGGCGcctgctctgtgatctccatg	8	ggo-mir-421,ssc-mir-421,bta-mir-421,cfa-mir-421,ptr-mir-421,ppy-mir-421,mmu-mir-421,rno-mir-421,	ggo-mir-421	gtattcacagtgcctaatccggtgcacattgtaggcctcattaaatgtttgttgaatgaaaaaatgaatcATCAACAGACATTAATTGGGCGcctgctctgtgatctccatg	ggo-miR-421	ATCAACAGACATTAATTGGGCG	3'	Diff	gp3	....((((.(..((......))..).....((((((((((...((((((((((((.(((.........)))))))))))))))...)))).))))))...))))........	67	41.1	-39.6	386.752	523.383	546.861	442.424	433.307	367.592	936.538	783.708	615.833	1026.45	728.568	469.015	middle
89	110	bta-miR-424-5p	CAGCAGCAATTCATGTTTTGA	21					tcgttgactccgaggggatgCAGCAGCAATTCATGTTTTGAagtgctttaaacggttCAAAACGTGAGGCGCTGCTATacccccttgcgaggaagt	10	bta-mir-424,ssc-mir-424,eca-mir-424,hsa-mir-424,ptr-mir-424,ggo-mir-424,cgr-mir-322,mmu-mir-322,rno-mir-322-1,	bta-mir-424	tcgttgactccgaggggatgCAGCAGCAATTCATGTTTTGAagtgctttaaacggttCAAAACGTGAGGCGCTGCTATacccccttgcgaggaagt	bta-miR-424-5p	CAGCAGCAATTCATGTTTTGA	5'	Yes	gp3	...((..((((((((((.(..((((((..(((((((((((((((.......))..)))))))))))))..))))))..).))))))).)))..)).	92	50	-42.6	36.7502	46.3757	35.5975	74.6049	36.0748	37.6527	166.812	59.9813	26.4362	146.057	122.824	32.5328	middle
89	111	bta-miR-424-3p	CAAAACGTGAGGCGCTGCTAT	21					tcgttgactccgaggggatgCAGCAGCAATTCATGTTTTGAagtgctttaaacggttCAAAACGTGAGGCGCTGCTATacccccttgcgaggaagt	10	bta-mir-424,ssc-mir-424,eca-mir-424,hsa-mir-424,ptr-mir-424,ggo-mir-424,cgr-mir-322,mmu-mir-322,rno-mir-322-1,	bta-mir-424	tcgttgactccgaggggatgCAGCAGCAATTCATGTTTTGAagtgctttaaacggttCAAAACGTGAGGCGCTGCTATacccccttgcgaggaagt	bta-miR-424-3p	CAAAACGTGAGGCGCTGCTAT	3'	Yes	gp3	...((..((((((((((.(..((((((..(((((((((((((((.......))..)))))))))))))..))))))..).))))))).)))..)).	92	50	-42.6	0.875004	5.96259	5.15907	4.33749	4.09941	1.27636	8.09021	4.6692	6.5007	14.2	7.44387	1.35553	middle
91	112	bta-miR-432_1ss23GT	TCTTGGAGTAGGTCATTGGGTGT	23					gcatgactcctccaagTCTTGGAGTAGGTCATTGGGTGGatcctttatttccctatgtgggccactggatggctcctccatgtcttggcg	8	bta-mir-432,ssc-mir-432,eca-mir-432,cfa-mir-432,hsa-mir-432,ptr-mir-432,ggo-mir-432,mml-mir-432,	bta-mir-432	gcatgactcctccaagTCTTGGAGTAGGTCATTGGGTGGatcctttatttccctatgtgggccactggatggctcctccatgtcttggcg	bta-miR-432	TCTTGGAGTAGGTCATTGGGTGG	5'	Diff	gp3	...........(((((...(((((..((((((..(((((.(((..(((......))).))))))))..)))))).)))))...)))))..	77	53.3	-31.9	0	0	3.09544	3.46999	0.819882	0	3.08198	0.718339	0	5.07142	1.86097	0.677767	low
92	113	mmu-miR-434-5p_R-1	GCTCGACTCATGGTTTGAACC	21					tcgactctgggtttgaaccaaaGCTCGACTCATGGTTTGAACCAttacttaattcgtggTTTGAACCATCACTCGACTCCTggttcgaaccatc	3	mmu-mir-434,rno-mir-434-1,	mmu-mir-434	tcgactctgggtttgaaccaaaGCTCGACTCATGGTTTGAACCAttacttaattcgtggTTTGAACCATCACTCGACTCCTggttcgaaccatc	mmu-miR-434-5p	GCTCGACTCATGGTTTGAACCA	5'	Diff	gp3	.........(((((((((((.((.((((...((((((..((((((..........))))))..))))))...))))))..)))))))))))...	82	45.7	-38.8	0	0	0	0	0	0	0	5.02837	7.80084	3.04285	1.86097	1.35553	low
92	114	mmu-miR-434-3p	TTTGAACCATCACTCGACTCCT	22					tcgactctgggtttgaaccaaaGCTCGACTCATGGTTTGAACCAttacttaattcgtggTTTGAACCATCACTCGACTCCTggttcgaaccatc	3	mmu-mir-434,rno-mir-434-1,	mmu-mir-434	tcgactctgggtttgaaccaaaGCTCGACTCATGGTTTGAACCAttacttaattcgtggTTTGAACCATCACTCGACTCCTggttcgaaccatc	mmu-miR-434-3p	TTTGAACCATCACTCGACTCCT	3'	Yes	gp3	.........(((((((((((.((.((((...((((((..((((((..........))))))..))))))...))))))..)))))))))))...	82	45.7	-38.8	0	0	0	0	0	0	0	5.74671	3.46704	7.09998	7.44387	0	low
93	115	mmu-miR-451a_L+5R-1	CGTGGAAACCGTTACCATTACTGAGT	26					cttgggaatggcgaggAAACCGTTACCATTACTGAGTTtagtaatggtaacggttctcttgctgctcccaca	11	mmu-mir-451a,ssc-mir-451,bta-mir-451,eca-mir-451,cfa-mir-451,hsa-mir-451a,ptr-mir-451,mml-mir-451,rno-mir-451,mdo-mir-451,oan-mir-451,	mmu-mir-451a	cttgggaatggcgaggAAACCGTTACCATTACTGAGTTtagtaatggtaacggttctcttgctgctcccaca	mmu-miR-451a	AAACCGTTACCATTACTGAGTT	5'	Diff	gp3	..(((((..((((((..(((((((((((((((((....)))))))))))))))))..))))))..)))))..	68	47.2	-45.7	5.25002	10.6002	11.3499	8.67499	5.73917	14.04	5.39347	40.9453	23.4025	12.1714	17.369	75.9099	middle
[truncated: 89 more rows]

## Sheet: Table S3
Talbe S3: Length distribution of miRNAs identified in the study
Length	Unique miRNA	%
18	99	10.9392
19	126	13.9227
20	86	9.50276
21	145	16.0221
22	274	30.2762
23	119	13.1492
24	41	4.53039
25	11	1.21547
26	4	0.441989
all	905	100

## Sheet: Table S4
Table S4 (A): Detailed information of DE miRNAs between poly I:C stimulation group (DT) and control group (DC) of Dapulian
miR_name	miR_seq	down/up regulated	pvalue(t_test)	DT(mean)	DC(mean)	DC/DP11	DC/DP12	DC/DP19	DT/DP11P	DT/DP12P	DT/DP19P
[truncated: 45 more rows]

## Sheet: Table S5
Table S5: Target genes of the DE miRNAs in response to poly I:C stimulation in Dapulian (DT_DC) and Landrace (LT_LC)
[truncated: 5,129 more rows]

[truncated: 11 more sheets: Table S6, Table S7, Table S8, Table S9, Table S10, Table S11, Table S12, Table S13, Table S14, Table S15, Table S16]
